# Supplementary material for: Membrane proteome of the thermoalkaliphile Caldalkalibacillus thermarum TA2.A1
Source: Front Microbiol. 2023 Jul 28;14:1228266. doi: 10.3389/fmicb.2023.1228266 (PMC10416648; doi:10.3389/fmicb.2023.1228266)
Supplement: Supplementary Table 1 — Raw mass spectrometry data of all performed conditions. The absolute peak area and the number of unique peptides are shown for all proteins detected per condition. Some column headers are self-explanatory, as the name directly refers to a specific condition. For those that do not, the order is as follows: FOS, solubilised at 65°C (S1); FOS, solubilised at 65°C (S2); FOS, solubilised at 50°C (S3); FOS, solubilised at 65°C (S4); FOS, solubilised at 80°C (S5); SDS, solubilised at 50°C (S6); SDS, solubilised at 65°C (S7); and SDS, solubilised at 80°C (S8). [file Table_1.XLSX]

## Sheet: Protein_ID_summary
#	Accession	Description	S1_01_Area	S1_01_Unique	S1_02_Area	S1_02_Unique	S2_01_Area	S2_01_Unique	S2_02_Area	S2_02_Unique	S3_01_Area	S3_01_Unique	S3_02_Area	S3_02_Unique	S4_01_Area	S4_01_Unique	S4_02_Area	S4_02_Unique	S5_01_Area	S5_01_Unique	S5_02_Area	S5_02_Unique	S6_01_Area	S6_01_Unique	S6_02_Area	S6_02_Unique	S7_01_Area	S7_01_Unique	S7_02_Area	S7_02_Unique	S8_01_Area	S8_01_Unique	S8_02_Area	S8_02_Unique	S10_Chymo_Area	S10_Chymo_Unique	S10_LysC_Area	S10_LysC_Unique	S9_Chymo_Area	S9_Chymo_Unique	S9_LysC_Area	S9_LysC_Unique	whole_cell_lysate_Area	whole_cell_lysate_Unique
1	QZT33192.1	FAD-dependent oxidoreductase [Caldalkalibacillus thermarum TA2.A1]	3980000000	20	3570000000	18	2860000000	15	2620000000	18	2830000000	22	2640000000	22	2350000000	17	2180000000	19	2290000000	17	1980000000	17	1890000000	15	1790000000	18	3090000000	20	3360000000	22	4420000000	22	5370000000	25	1560000000	10	1750000000	13	1730000000	15	4030000000	15	520000	1
2	QZT34590.1	chaperonin GroEL [Caldalkalibacillus thermarum TA2.A1]	1980000000	16	1470000000	19	1420000000	16	1060000000	18	1770000000	20	1310000000	22	1360000000	17	988000000	19	1050000000	17	681000000	17	5110000000	21	5620000000	26	6840000000	29	6700000000	32	9780000000	34	8290000000	31	6960000000	19	22100000000	36	6360000000	26	6610000000	24	36700000000	63
3	QZT34684.1	iron-sulfur cluster-binding protein [Caldalkalibacillus thermarum TA2.A1]	794000000	12	663000000	10	648000000	10	547000000	10	285000000	11	313000000	12	488000000	10	392000000	11	427000000	9	416000000	7	320000000	8	348000000	9	345000000	15	334000000	15	1100000000	17	623000000	17	21800000	2	21400000	2	21200000	1	131000000	4	10600000	7
4	QZT34390.1	ATP-dependent protease ATP-binding subunit ClpC [Caldalkalibacillus thermarum TA2.A1]	1510000000	17	1180000000	18	1270000000	18	1230000000	17	424000000	18	421000000	18	948000000	19	704000000	16	2010000000	17	1660000000	14	2390000000	25	2420000000	31	3080000000	42	2850000000	40	4510000000	45	3480000000	46	689000000	15	4770000000	31	162000000	5	1240000000	14	4670000000	69
5	QZT34889.1	2-oxoglutarate dehydrogenase complex dihydrolipoyllysine-residue succinyltransferase [Caldalkalibacillus thermarum TA2.A1]	474000000	12	627000000	13	422000000	9	312000000	10	241000000	11	233000000	11	335000000	10	247000000	11	93600000	8	113000000	6	379000000	15	461000000	15	327000000	12	316000000	15	733000000	18	676000000	21	252000000	3	1100000000	14	32700000	2	106000000	3	377000000	22
6	QZT33378.1	flotillin-like protein FloA [Caldalkalibacillus thermarum TA2.A1]	3950000000	13	4020000000	16	2330000000	13	2160000000	12	4950000000	17	4330000000	17	2860000000	12	2480000000	15	2490000000	14	1950000000	13	2410000000	17	2240000000	17	5270000000	19	4470000000	18	10800000000	19	9190000000	19	822000000	9	9650000000	8	2080000000	20	5380000000	5	3100000000	24
7	QZT34418.1	elongation factor Tu [Caldalkalibacillus thermarum TA2.A1]	1740000000	11	830000000	13	2430000000	14	1080000000	14	1160000000	14	1070000000	15	1210000000	12	956000000	11	2360000000	14	2660000000	15	6470000000	16	5520000000	16	5730000000	19	4840000000	21	6760000000	21	5480000000	18	4090000000	9	4220000000	15	2540000000	11	1030000000	10	21300000000	40
8	QZT34166.1	F0F1 ATP synthase subunit beta [Caldalkalibacillus thermarum TA2.A1]	4030000000	20	3530000000	17	2800000000	18	2370000000	15	1760000000	17	1680000000	18	1950000000	16	1650000000	14	3710000000	17	3070000000	17	547000000	9	651000000	11	861000000	16	854000000	16	2810000000	21	2370000000	18	1620000000	12	1050000000	6	298000000	10	159000000	4	3850000000	30
9	QZT33837.1	precorrin-3B C(17)-methyltransferase [Caldalkalibacillus thermarum TA2.A1]	654000000	15	634000000	14	566000000	15	404000000	14	674000000	17	535000000	15	564000000	15	459000000	14	352000000	13	347000000	10	1240000000	12	884000000	11	2720000000	21	2270000000	22	2870000000	23	2110000000	22	603000000	9	2870000000	13	384000000	10	1410000000	12	639000000	30
10	QZT33336.1	ribonuclease J [Caldalkalibacillus thermarum TA2.A1]	854000000	16	772000000	15	640000000	15	575000000	13	600000000	15	552000000	18	528000000	12	460000000	15	605000000	14	647000000	14	619000000	16	712000000	21	846000000	21	591000000	24	1420000000	25	1120000000	24	615000000	15	835000000	18	143000000	8	663000000	13	305000000	32
11	QZT34367.1	ATP-dependent zinc metalloprotease FtsH [Caldalkalibacillus thermarum TA2.A1]	1860000000	12	1590000000	13	1380000000	14	1260000000	12	1170000000	13	1040000000	13	1120000000	14	942000000	12	1150000000	12	886000000	9	575000000	14	548000000	12	907000000	11	923000000	15	1680000000	21	1460000000	21	462000000	8	1000000000	10	104000000	6	1080000000	8	364000000	31
12	QZT33807.1	L-glutamate gamma-semialdehyde dehydrogenase [Caldalkalibacillus thermarum TA2.A1]	359000000	13	191000000	13	318000000	12	279000000	13	203000000	13	152000000	10	344000000	10	216000000	12	522000000	15	411000000	14	301000000	6	374000000	7	618000000	21	832000000	19	1530000000	28	1750000000	24	690000000	13	760000000	11	0	0	180000000	6	4240000000	42
13	QZT35524.1	precorrin-6A reductase [Caldalkalibacillus thermarum TA2.A1]	2700000000	14	1990000000	12	1550000000	10	1300000000	10	1420000000	17	1150000000	15	1670000000	13	1440000000	13	1760000000	14	1420000000	15	1900000000	17	1870000000	16	2910000000	21	2600000000	16	3730000000	21	2880000000	19	483000000	7	2930000000	11	272000000	6	2960000000	11	496000000	21
14	QZT33835.1	precorrin-8X methylmutase [Caldalkalibacillus thermarum TA2.A1]	2090000000	10	1860000000	7	1270000000	7	1030000000	7	1660000000	9	1720000000	8	1560000000	8	1060000000	7	1060000000	9	802000000	7	1490000000	6	1160000000	6	3710000000	11	3470000000	12	4410000000	11	3730000000	11	1080000000	4	1050000000	9	516000000	11	1320000000	10	3580000000	17
15	QZT35063.1	30S ribosomal protein S4 [Caldalkalibacillus thermarum TA2.A1]	1070000000	8	898000000	7	466000000	8	387000000	6	618000000	8	525000000	9	437000000	8	359000000	6	474000000	9	347000000	8	833000000	6	825000000	8	911000000	9	882000000	9	1630000000	11	1420000000	13	597000000	4	2120000000	12	0	0	834000000	7	650000000	18
16	QZT34389.1	protein arginine kinase [Caldalkalibacillus thermarum TA2.A1]	2290000000	8	2410000000	8	3250000000	10	2890000000	11	975000000	9	1030000000	9	1650000000	10	1480000000	11	3860000000	9	3040000000	10	3950000000	14	3250000000	15	3830000000	15	3990000000	15	6050000000	16	4990000000	16	220000000	7	697000000	6	0	0	1320000000	4	760000000	16
17	QZT32982.1	translation initiation factor IF-2 [Caldalkalibacillus thermarum TA2.A1]	706000000	11	605000000	10	450000000	9	320000000	9	394000000	15	415000000	18	346000000	12	263000000	13	222000000	6	234000000	7	1130000000	22	926000000	23	1750000000	24	1400000000	23	2160000000	19	1840000000	20	495000000	4	3520000000	21	223000000	7	373000000	10	435000000	27
18	QZT33595.1	succinate dehydrogenase flavoprotein subunit [Caldalkalibacillus thermarum TA2.A1]	497000000	16	389000000	13	312000000	16	281000000	15	210000000	13	188000000	14	255000000	17	186000000	16	2420000000	24	2050000000	25	104000000	5	200000000	9	347000000	12	368000000	15	4340000000	32	3280000000	30	955000000	9	2990000000	16	0	0	140000000	4	1990000000	46
19	QZT32481.1	dioxygenase [Caldalkalibacillus thermarum TA2.A1]	1480000000	11	1680000000	9	1880000000	12	1610000000	11	1760000000	12	1300000000	13	1700000000	14	1260000000	13	1730000000	12	1510000000	11	1390000000	9	1180000000	9	2770000000	12	2210000000	10	3650000000	12	2830000000	13	2020000000	9	84100000	3	1230000000	6	506000000	6	4010000000	15
20	QZT34859.1	glutathione ABC transporter substrate-binding protein [Caldalkalibacillus thermarum TA2.A1]	449000000	10	504000000	11	617000000	9	478000000	10	0	0	0	0	225000000	11	217000000	11	6030000000	18	5170000000	18	0	0	0	0	1770000	1	6720000	3	11600000000	24	9490000000	24	6660000000	21	11100000000	7	704000000	6	208000000	3	2820000000	27
21	QZT33106.1	cell division protein FtsA [Caldalkalibacillus thermarum TA2.A1]	284000000	14	202000000	10	223000000	9	235000000	12	234000000	13	159000000	11	174000000	15	89400000	14	231000000	13	116000000	7	600000000	12	695000000	13	752000000	15	758000000	12	1180000000	19	1010000000	21	99800000	2	1030000000	6	130000000	3	198000000	5	227000000	22
22	QZT33635.1	NAD(P)/FAD-dependent oxidoreductase [Caldalkalibacillus thermarum TA2.A1]	955000000	6	1070000000	8	902000000	9	616000000	9	1060000000	12	731000000	10	687000000	7	624000000	10	717000000	12	518000000	9	97800000	5	145000000	7	428000000	9	433000000	8	2620000000	15	2160000000	14	706000000	9	758000000	4	478000000	11	648000000	4	339000000	20
23	QZT33842.1	catalase/peroxidase HPI [Caldalkalibacillus thermarum TA2.A1]	215000000	12	232000000	9	332000000	11	264000000	11	241000000	8	172000000	8	245000000	11	234000000	11	288000000	12	174000000	9	401000000	9	328000000	9	626000000	14	679000000	15	966000000	15	708000000	17	79000000	5	179000000	7	146000000	5	152000000	10	1690000000	38
24	QZT32969.1	ribonuclease J [Caldalkalibacillus thermarum TA2.A1]	631000000	13	457000000	12	625000000	14	479000000	15	457000000	12	427000000	11	392000000	15	359000000	16	743000000	14	597000000	15	465000000	10	440000000	16	782000000	21	756000000	21	1180000000	17	863000000	21	201000000	4	259000000	6	40700000	3	301000000	11	413000000	33
25	QZT32617.1	Glu/Leu/Phe/Val dehydrogenase [Caldalkalibacillus thermarum TA2.A1]	1090000000	12	608000000	9	363000000	8	321000000	10	554000000	9	474000000	8	278000000	8	189000000	5	643000000	11	563000000	8	61100000	4	49100000	3	133000000	11	67100000	7	1530000000	21	1510000000	19	169000000	5	1090000000	12	224000000	3	229000000	7	805000000	25
26	QZT34687.1	TIGR01777 family oxidoreductase [Caldalkalibacillus thermarum TA2.A1]	430000000	7	361000000	6	548000000	7	270000000	5	157000000	5	182000000	6	232000000	6	242000000	8	579000000	8	546000000	8	64600000	1	51700000	2	441000000	3	351000000	3	458000000	6	418000000	6	273000000	4	10800000	2	57800000	2	353000000	6	239000000	10
27	QZT33105.1	cell division protein FtsZ [Caldalkalibacillus thermarum TA2.A1]	688000000	9	550000000	10	739000000	6	598000000	6	558000000	13	552000000	12	697000000	10	542000000	10	658000000	9	481000000	8	2720000000	17	2730000000	20	2230000000	19	3080000000	22	3800000000	20	3280000000	20	1290000000	7	2020000000	16	793000000	10	1090000000	10	506000000	20
28	QZT33143.1	cytochrome c biogenesis protein ResB [Caldalkalibacillus thermarum TA2.A1]	2320000000	12	1940000000	14	1350000000	10	1140000000	11	509000000	12	918000000	13	1080000000	13	790000000	12	1260000000	12	1160000000	13	56400000	2	28100000	3	66700000	4	53100000	4	638000000	12	329000000	9	444000000	6	1540000000	7	262000000	2	1030000000	7	183000000	20
29	QZT33760.1	Fe-S cluster assembly ATPase SufC [Caldalkalibacillus thermarum TA2.A1]	295000000	9	320000000	9	553000000	8	520000000	8	213000000	3	150000000	6	203000000	8	170000000	7	978000000	8	884000000	7	631000000	8	803000000	10	635000000	11	671000000	14	773000000	13	744000000	15	223000000	1	389000000	7	78800000	1	291000000	4	6440000000	23
30	QZT35525.1	protoporphyrinogen oxidase [Caldalkalibacillus thermarum TA2.A1]	312000000	9	282000000	12	346000000	11	303000000	12	144000000	12	92200000	8	238000000	10	162000000	9	434000000	10	414000000	9	176000000	11	271000000	13	158000000	9	211000000	14	518000000	19	371000000	17	19700000	2	65800000	3	11300000	1	275000000	10	44000000	15
31	QZT34169.1	F0F1 ATP synthase subunit delta [Caldalkalibacillus thermarum TA2.A1]	565000000	9	407000000	9	342000000	9	283000000	8	263000000	8	217000000	8	289000000	9	198000000	7	230000000	7	128000000	5	5070000	2	3450000	3	22500000	6	17100000	6	86700000	9	55500000	7	0	0	9080000	2	74500000	3	241000000	4	267000000	12
32	QZT34161.1	NADH-quinone oxidoreductase subunit D [Caldalkalibacillus thermarum TA2.A1]	1130000000	11	1090000000	12	1210000000	11	935000000	11	807000000	10	906000000	11	767000000	12	754000000	13	964000000	8	740000000	9	260000000	7	278000000	7	832000000	15	955000000	15	2180000000	13	1530000000	13	684000000	6	361000000	5	458000000	2	2720000000	6	311000000	22
33	QZT33830.1	cobyrinate a c-diamide synthase [Caldalkalibacillus thermarum TA2.A1]	609000000	8	401000000	9	641000000	9	457000000	8	717000000	8	650000000	8	421000000	8	476000000	9	589000000	11	418000000	12	361000000	9	457000000	10	987000000	16	908000000	15	1030000000	18	855000000	16	111000000	6	187000000	5	37800000	2	148000000	7	1590000000	32
34	QZT33193.1	electron transfer flavoprotein subunit alpha/FixB family protein [Caldalkalibacillus thermarum TA2.A1]	2090000000	12	1760000000	13	1500000000	15	1330000000	13	1560000000	16	1310000000	12	1320000000	14	1180000000	13	1150000000	11	1020000000	12	2590000000	13	2410000000	13	3680000000	18	3460000000	18	4860000000	20	3900000000	20	344000000	8	5760000000	11	2200000000	13	3350000000	11	2350000	2
35	QZT34863.1	dipeptide ABC transporter ATP-binding protein [Caldalkalibacillus thermarum TA2.A1]	690000000	13	439000000	11	537000000	10	250000000	10	403000000	9	439000000	10	414000000	11	366000000	12	395000000	11	463000000	11	538000000	8	503000000	10	622000000	10	586000000	9	888000000	16	807000000	12	72500000	1	499000000	6	58900000	1	612000000	5	126000000	15
36	QZT32949.1	cytochrome c oxidase subunit II [Caldalkalibacillus thermarum TA2.A1]	676000000	5	613000000	6	621000000	4	431000000	5	114000000	4	183000000	4	478000000	5	152000000	6	324000000	6	333000000	6	46800000	3	35600000	2	133000000	5	100000000	5	587000000	9	498000000	8	69600000	2	447000000	6	22300000	1	222000000	5	475000000	13
37	QZT33625.1	endonuclease MutS2 [Caldalkalibacillus thermarum TA2.A1]	163000000	10	112000000	9	80300000	10	36900000	9	90800000	8	88000000	9	52900000	8	41000000	8	58000000	6	14900000	5	236000000	10	215000000	10	348000000	23	258000000	18	322000000	20	230000000	18	36200000	1	231000000	8	96200000	3	130000000	7	260000000	22
38	QZT32673.1	thiamine pyrophosphate-dependent dehydrogenase E1 component subunit alpha [Caldalkalibacillus thermarum TA2.A1]	639000000	12	556000000	11	454000000	8	405000000	8	577000000	12	473000000	8	392000000	8	304000000	8	408000000	8	328000000	9	216000000	4	215000000	5	595000000	6	701000000	13	1020000000	13	809000000	14	194000000	2	459000000	10	75700000	3	315000000	5	528000000	21
39	QZT34202.1	4Fe-4S dicluster domain-containing protein [Caldalkalibacillus thermarum TA2.A1]	1450000000	17	1200000000	16	1090000000	14	832000000	15	431000000	16	598000000	18	965000000	14	825000000	15	1290000000	14	1070000000	15	155000000	12	108000000	9	124000000	10	117000000	10	1310000000	26	1180000000	22	672000000	12	1040000000	19	320000000	12	1920000000	17	178000000	29
40	QZT33296.1	sn-glycerol-3-phosphate ABC transporter ATP-binding protein UgpC [Caldalkalibacillus thermarum TA2.A1]	405000000	11	364000000	12	349000000	8	286000000	10	209000000	10	287000000	14	288000000	9	247000000	12	213000000	9	51500000	3	577000000	6	545000000	7	755000000	11	705000000	10	1100000000	11	798000000	10	212000000	6	302000000	6	214000000	5	351000000	6	404000000	19
41	QZT33824.1	ABC transporter substrate-binding protein [Caldalkalibacillus thermarum TA2.A1]	404000000	7	469000000	7	400000000	7	322000000	7	86600000	4	93700000	4	336000000	6	278000000	7	305000000	5	127000000	6	14000000	1	13700000	1	313000000	8	242000000	8	857000000	6	705000000	5	653000000	7	0	0	113000000	6	0	0	41400000	8
42	QZT33520.1	type IV pilus twitching motility protein PilT [Caldalkalibacillus thermarum TA2.A1]	310000000	12	225000000	8	153000000	11	121000000	10	176000000	12	141000000	9	121000000	10	85900000	10	52800000	9	84400000	8	93900000	5	118000000	8	211000000	11	168000000	13	350000000	13	279000000	12	8620000	1	0	0	0	0	8730000	1	27200000	10
43	QZT33785.1	sugar ABC transporter substrate-binding protein [Caldalkalibacillus thermarum TA2.A1]	303000000	9	266000000	9	196000000	9	121000000	8	60700000	6	100000000	8	159000000	9	177000000	11	110000000	7	118000000	6	0	0	0	0	385000000	13	234000000	11	505000000	10	335000000	9	0	0	0	0	0	0	0	0	26600000	10
44	QZT34182.1	methyl-accepting chemotaxis protein [Caldalkalibacillus thermarum TA2.A1]	1270000000	6	1150000000	6	976000000	4	618000000	4	989000000	5	814000000	6	787000000	5	338000000	5	705000000	4	414000000	5	488000000	11	502000000	12	649000000	11	335000000	8	1040000000	15	674000000	14	6680000	1	1480000000	5	76600000	1	786000000	6	362000000	15
45	QZT34989.1	phosphate/phosphite/phosphonate ABC transporter substrate-binding protein [Caldalkalibacillus thermarum TA2.A1]	400000000	6	564000000	5	320000000	3	270000000	5	613000000	5	554000000	5	331000000	3	267000000	3	169000000	3	143000000	3	59300000	5	40400000	3	1870000000	11	1820000000	11	2090000000	10	1680000000	9	681000000	10	1880000000	6	739000000	9	620000000	6	582000000	12
46	QZT34770.1	NADP-dependent isocitrate dehydrogenase [Caldalkalibacillus thermarum TA2.A1]	286000000	8	362000000	10	395000000	9	351000000	10	378000000	9	382000000	8	337000000	9	302000000	12	411000000	10	358000000	12	654000000	8	621000000	11	951000000	14	891000000	13	1180000000	17	817000000	12	571000000	9	705000000	10	245000000	7	393000000	6	5130000000	35
47	QZT34685.1	(Fe-S)-binding protein [Caldalkalibacillus thermarum TA2.A1]	491000000	5	449000000	4	451000000	7	344000000	5	328000000	4	227000000	5	341000000	4	292000000	5	385000000	7	321000000	5	18500000	2	11900000	3	75600000	7	45500000	3	115000000	5	123000000	6	0	0	22800000	2	0	0	65300000	3	45100000	6
48	QZT33345.1	alpha-ketoacid dehydrogenase subunit beta [Caldalkalibacillus thermarum TA2.A1]	345000000	10	271000000	8	171000000	7	134000000	7	38700000	6	31200000	6	84400000	7	130000000	9	195000000	7	241000000	7	75600000	6	83400000	7	814000000	13	626000000	14	1380000000	13	1260000000	16	943000000	10	1060000000	11	199000000	4	446000000	8	3560000000	30
49	QZT32585.1	ABC transporter substrate-binding protein [Caldalkalibacillus thermarum TA2.A1]	167000000	9	80000000	5	79200000	6	52000000	7	43700000	6	61500000	8	94300000	11	74300000	7	140000000	9	59400000	9	0	0	0	0	32600000	6	37700000	6	285000000	15	217000000	11	269000000	6	91900000	3	133000000	2	96300000	4	78400000	20
50	QZT34862.1	ABC transporter ATP-binding protein [Caldalkalibacillus thermarum TA2.A1]	229000000	7	188000000	6	114000000	8	119000000	8	155000000	10	137000000	9	130000000	8	115000000	7	211000000	6	196000000	6	327000000	9	282000000	10	335000000	11	367000000	15	556000000	13	584000000	12	47600000	1	889000000	14	64300000	2	659000000	8	108000000	13
51	QZT34456.1	P-loop NTPase [Caldalkalibacillus thermarum TA2.A1]	199000000	7	150000000	4	168000000	6	139000000	6	195000000	8	162000000	8	210000000	6	176000000	7	127000000	5	91900000	5	224000000	3	199000000	3	478000000	6	505000000	7	732000000	8	596000000	10	213000000	1	212000000	5	34400000	1	94300000	4	533000000	17
52	QZT33832.1	precorrin-2 C(20)-methyltransferase [Caldalkalibacillus thermarum TA2.A1]	1080000000	7	934000000	7	932000000	6	743000000	6	727000000	9	757000000	9	755000000	9	573000000	7	712000000	7	620000000	8	646000000	6	629000000	8	2130000000	12	1890000000	12	2030000000	15	1990000000	14	221000000	4	2360000000	7	1000000000	6	1320000000	7	1110000000	20
53	QZT34162.1	NADH-quinone oxidoreductase subunit C [Caldalkalibacillus thermarum TA2.A1]	1670000000	11	1750000000	10	1230000000	10	1160000000	9	1440000000	9	1460000000	9	966000000	9	902000000	10	986000000	8	793000000	7	47400000	4	53900000	7	295000000	7	222000000	6	1110000000	10	760000000	10	259000000	5	1020000000	10	729000000	4	833000000	4	146000000	12
54	QZT34282.1	sugar ABC transporter substrate-binding protein [Caldalkalibacillus thermarum TA2.A1]	70800000	6	58900000	6	50700000	6	26100000	5	0	0	0	0	22000000	3	35400000	6	55900000	7	33500000	5	0	0	0	0	0	0	0	0	106000000	7	74200000	6	5410000	2	73500000	3	0	0	25200000	1	25400000	8
55	QZT33194.1	electron transfer flavoprotein subunit beta/FixA family protein [Caldalkalibacillus thermarum TA2.A1]	1860000000	10	2030000000	8	1640000000	8	1460000000	7	2270000000	10	2050000000	9	1530000000	8	1110000000	8	883000000	9	452000000	10	3420000000	15	3000000000	16	3320000000	15	3080000000	14	3730000000	17	3550000000	15	128000000	3	6400000000	13	508000000	7	4200000000	13	345000	2
56	QZT34313.1	pyridoxal 5'-phosphate synthase lyase subunit PdxS [Caldalkalibacillus thermarum TA2.A1]	490000000	7	372000000	8	368000000	7	348000000	6	335000000	10	232000000	9	341000000	7	296000000	8	261000000	8	220000000	6	369000000	9	316000000	8	501000000	13	343000000	9	537000000	13	459000000	12	83600000	1	232000000	8	0	0	112000000	3	6750000000	27
57	QZT32890.1	catalase/peroxidase HPI [Caldalkalibacillus thermarum TA2.A1]	252000000	7	92600000	8	223000000	7	191000000	7	193000000	7	145000000	9	206000000	6	190000000	8	127000000	8	152000000	5	117000000	5	182000000	9	489000000	13	522000000	15	751000000	17	554000000	18	0	0	1150000000	14	0	0	262000000	8	5070000000	47
58	QZT35341.1	6-phosphofructokinase [Caldalkalibacillus thermarum TA2.A1]	133000000	9	79600000	7	133000000	8	86600000	8	29400000	4	26300000	3	71500000	7	79500000	7	101000000	8	79600000	7	32400000	1	24100000	2	187000000	6	179000000	4	351000000	7	232000000	5	8350000	1	38200000	2	0	0	197000000	3	449000000	15
59	QZT33026.1	GTP-sensing pleiotropic transcriptional regulator CodY [Caldalkalibacillus thermarum TA2.A1]	151000000	7	115000000	8	77300000	7	68100000	5	120000000	7	60700000	5	58000000	6	47000000	6	55200000	5	41500000	4	368000000	4	360000000	4	469000000	6	449000000	8	801000000	9	607000000	10	182000000	4	272000000	7	81700000	3	47900000	2	2370000000	24
60	QZT34955.1	glyceraldehyde-3-phosphate dehydrogenase [Caldalkalibacillus thermarum TA2.A1]	167000000	6	112000000	6	206000000	8	181000000	8	289000000	9	276000000	10	205000000	8	170000000	7	178000000	7	79200000	4	284000000	6	297000000	7	559000000	12	501000000	11	571000000	11	576000000	12	65200000	5	256000000	3	33300000	2	142000000	2	0	0
61	QZT34741.1	type I-B CRISPR-associated protein Cas7/Cst2/DevR [Caldalkalibacillus thermarum TA2.A1]	98800000	7	59700000	4	72600000	7	85300000	9	78000000	5	31700000	5	52500000	6	53600000	6	52600000	4	60400000	4	231000000	6	151000000	6	448000000	10	280000000	12	754000000	12	585000000	10	166000000	6	17300000	2	109000000	3	35500000	2	1070000000	21
62	QZT33828.1	nicotinate-nucleotide--dimethylbenzimidazole phosphoribosyltransferase [Caldalkalibacillus thermarum TA2.A1]	288000000	8	239000000	9	352000000	10	333000000	11	277000000	8	247000000	8	304000000	7	238000000	7	317000000	9	256000000	8	209000000	3	216000000	5	449000000	9	480000000	13	539000000	12	461000000	11	107000000	2	0	0	0	0	50700000	3	3160000000	23
63	QZT33805.1	ABC transporter substrate-binding protein [Caldalkalibacillus thermarum TA2.A1]	1380000000	6	1260000000	6	778000000	4	559000000	4	1470000000	7	1300000000	5	883000000	4	680000000	5	469000000	3	437000000	4	102000000	4	88300000	5	1960000000	6	1550000000	6	2670000000	7	2150000000	7	5120000000	18	2710000000	4	1990000000	15	1870000000	3	1760000000	8
64	QZT35312.1	type I-B CRISPR-associated protein Cas7/Csh2 [Caldalkalibacillus thermarum TA2.A1]	200000000	6	160000000	6	162000000	5	146000000	5	91000000	6	51600000	4	135000000	5	114000000	5	129000000	6	86500000	2	113000000	5	162000000	6	185000000	8	174000000	8	304000000	10	262000000	11	0	0	31600000	2	0	0	108000000	4	3170000000	30
65	QZT33833.1	bifunctional cobalt-precorrin-7 (C(5))-methyltransferase/cobalt-precorrin-6B (C(15))-methyltransferase [Caldalkalibacillus thermarum TA2.A1]	429000000	12	339000000	11	388000000	11	295000000	13	69600000	9	184000000	12	134000000	11	120000000	12	391000000	12	311000000	10	68900000	7	41300000	7	164000000	11	132000000	13	459000000	17	410000000	19	50200000	3	226000000	6	50300000	4	182000000	5	1770000000	38
66	QZT33886.1	ArsJ-associated glyceraldehyde-3-phosphate dehydrogenase [Caldalkalibacillus thermarum TA2.A1]	119000000	7	109000000	7	65300000	6	92400000	6	226000000	10	196000000	9	106000000	8	94500000	8	92400000	6	61900000	3	202000000	8	320000000	9	560000000	14	532000000	16	628000000	15	530000000	14	35700000	1	279000000	7	78100000	2	177000000	4	10300000000	36
67	QZT34250.1	trypsin-like peptidase domain-containing protein [Caldalkalibacillus thermarum TA2.A1]	904000000	5	778000000	4	763000000	5	831000000	5	332000000	5	458000000	5	760000000	5	642000000	4	913000000	5	838000000	5	573000000	6	606000000	7	847000000	8	628000000	8	1420000000	9	1110000000	10	478000000	6	208000000	3	59700000	2	859000000	6	21300000	3
68	QZT33542.1	trigger factor [Caldalkalibacillus thermarum TA2.A1]	300000000	8	269000000	9	128000000	6	85200000	5	183000000	8	69800000	6	47400000	4	60400000	5	64700000	3	61700000	3	1000000000	14	1040000000	13	891000000	13	988000000	17	1060000000	18	738000000	14	157000000	5	957000000	11	25100000	1	40900000	2	2480000000	32
69	QZT32953.1	2-oxoacid:ferredoxin oxidoreductase subunit beta [Caldalkalibacillus thermarum TA2.A1]	345000000	7	205000000	7	336000000	6	168000000	5	100000000	6	173000000	6	234000000	8	95700000	6	234000000	7	134000000	7	71200000	3	135000000	3	283000000	10	308000000	9	341000000	11	274000000	11	0	0	31500000	3	18200000	1	12200000	1	924000000	18
70	QZT33243.1	Cys-tRNA(Pro) deacylase [Caldalkalibacillus thermarum TA2.A1]	252000000	7	247000000	6	211000000	3	226000000	6	207000000	7	153000000	7	163000000	3	140000000	4	431000000	8	401000000	5	643000000	4	512000000	4	805000000	7	782000000	7	901000000	6	1050000000	7	554000000	4	293000000	6	448000000	6	409000000	5	70000000	6
71	QZT33258.1	SDR family oxidoreductase [Caldalkalibacillus thermarum TA2.A1]	536000000	7	461000000	5	438000000	6	418000000	5	197000000	7	169000000	6	327000000	7	319000000	6	452000000	4	356000000	7	1110000000	7	1170000000	6	867000000	7	996000000	9	2030000000	13	1420000000	10	33400000	1	881000000	6	123000000	4	526000000	3	734000000	18
72	QZT32539.1	selenocysteine-specific translation elongation factor [Caldalkalibacillus thermarum TA2.A1]	83700000	6	85500000	6	78400000	6	58200000	5	16100000	4	21900000	4	24700000	3	7980000	2	56000000	5	27800000	3	28300000	5	51900000	6	56300000	10	60300000	13	108000000	12	123000000	15	3700000	1	3580000	1	0	0	10200000	4	23000000	14
73	QZT34059.1	LCP family protein [Caldalkalibacillus thermarum TA2.A1]	25200000	2	24600000	3	32500000	3	26500000	2	15600000	3	11400000	2	14900000	3	10600000	3	24300000	1	0	0	6840000	1	4230000	1	14000000	3	2590000	1	13500000	4	24000000	2	0	0	15500000	2	0	0	42300000	1	22500000	4
74	QZT35097.1	signal peptide peptidase SppA [Caldalkalibacillus thermarum TA2.A1]	139000000	7	121000000	7	94400000	4	103000000	6	0	0	0	0	70200000	5	64400000	7	68300000	5	30300000	5	0	0	0	0	0	0	0	0	29300000	2	28500000	2	19500000	1	47700000	1	0	0	49400000	2	24600000	6
75	QZT34084.1	SEC-C domain-containing protein [Caldalkalibacillus thermarum TA2.A1]	397000000	7	321000000	4	354000000	4	302000000	4	152000000	4	185000000	5	202000000	4	167000000	4	255000000	3	234000000	4	65500000	5	148000000	8	237000000	7	311000000	10	603000000	9	277000000	9	65400000	2	0	0	0	0	3450000	1	215000000	19
76	QZT34177.1	UDP-N-acetylglucosamine 2-epimerase (non-hydrolyzing) [Caldalkalibacillus thermarum TA2.A1]	41000000	5	42000000	6	20800000	3	23500000	4	47600000	7	37700000	6	36700000	5	25000000	5	20900000	5	14100000	4	39600000	2	31400000	3	36900000	6	25400000	6	67100000	6	26300000	6	0	0	0	0	0	0	0	0	470000000	28
77	QZT32621.1	flagellar brake domain-containing protein [Caldalkalibacillus thermarum TA2.A1]	87800000	6	57500000	5	60000000	5	30700000	6	56400000	6	41100000	7	29300000	5	33100000	5	36400000	5	24800000	5	8600000	2	3520000	1	102000000	3	138000000	4	161000000	5	2230000	2	0	0	36400000	1	0	0	18700000	2	7360000	3
78	QZT34167.1	F0F1 ATP synthase subunit gamma [Caldalkalibacillus thermarum TA2.A1]	393000000	5	280000000	6	411000000	6	233000000	5	110000000	7	98200000	7	241000000	6	179000000	5	329000000	5	293000000	6	0	0	0	0	0	0	0	0	103000000	4	91700000	5	75700000	3	235000000	7	47000000	2	69400000	4	300000000	13
79	QZT34586.1	cyclic pyranopterin monophosphate synthase MoaC [Caldalkalibacillus thermarum TA2.A1]	59200000	6	69900000	5	51000000	5	78400000	5	25700000	4	29100000	4	56100000	6	53200000	6	71700000	5	83700000	6	7600000	1	20100000	2	66600000	6	47900000	5	136000000	9	76300000	7	0	0	90600000	4	13500000	1	0	0	232000000	9
80	QZT34168.1	F0F1 ATP synthase subunit alpha [Caldalkalibacillus thermarum TA2.A1]	464000000	12	385000000	12	347000000	12	247000000	12	522000000	18	403000000	10	315000000	9	329000000	13	522000000	14	381000000	12	276000000	8	121000000	4	144000000	8	134000000	5	1740000000	16	1280000000	14	513000000	6	1520000000	9	1590000000	18	595000000	8	2680000000	27
81	QZT34424.1	30S ribosomal protein S19 [Caldalkalibacillus thermarum TA2.A1]	558000000	5	474000000	5	295000000	4	281000000	4	302000000	4	251000000	4	263000000	5	198000000	5	194000000	5	126000000	2	1290000000	5	1340000000	5	739000000	8	503000000	8	1140000000	8	823000000	6	0	0	1800000000	5	0	0	195000000	2	362000000	9
82	QZT35218.1	preprotein translocase subunit SecA [Caldalkalibacillus thermarum TA2.A1]	246000000	12	266000000	12	119000000	10	167000000	10	53000000	8	65600000	10	119000000	13	109000000	11	138000000	11	155000000	8	185000000	9	169000000	13	178000000	13	164000000	10	284000000	17	252000000	15	4650000	1	29300000	4	0	0	65000000	5	283000000	41
83	QZT34039.1	WecB/TagA/CpsF family glycosyltransferase [Caldalkalibacillus thermarum TA2.A1]	83100000	5	57400000	3	70000000	5	48500000	5	4220000	1	8470000	3	44000000	6	44200000	4	28400000	6	0	0	0	0	0	0	60300000	5	41500000	4	69700000	6	49000000	5	8440000	1	0	0	0	0	25100000	2	7010000	6
84	QZT34432.1	50S ribosomal protein L5 [Caldalkalibacillus thermarum TA2.A1]	969000000	8	715000000	9	456000000	9	293000000	8	660000000	9	494000000	9	406000000	8	313000000	9	370000000	9	272000000	8	1700000000	9	1270000000	10	1860000000	10	1830000000	10	1940000000	10	1720000000	11	0	0	2480000000	9	27900000	3	626000000	7	717000000	15
85	QZT33937.1	ribosome-associated translation inhibitor RaiA [Caldalkalibacillus thermarum TA2.A1]	1550000000	5	740000000	6	1080000000	3	704000000	3	110000000	7	110000000	9	632000000	5	425000000	3	464000000	5	54400000	4	1770000000	7	1600000000	6	1400000000	10	1030000000	8	1620000000	5	901000000	7	1430000000	5	3410000000	7	431000000	1	2340000000	7	2430000000	17
86	QZT33469.1	Rrf2 family transcriptional regulator [Caldalkalibacillus thermarum TA2.A1]	52200000	4	12200000	3	45300000	3	18500000	3	32000000	2	23400000	2	6840000	2	19000000	4	26500000	3	7870000	2	17300000	2	40000000	3	27100000	4	81700000	5	13000000	3	50600000	3	0	0	13800000	1	0	0	28700000	1	202000000	6
87	QZT33791.1	FAD-dependent oxidoreductase [Caldalkalibacillus thermarum TA2.A1]	15000000	1	13900000	1	11800000	2	10500000	1	0	0	0	0	5390000	1	2150000	1	7540000	1	4790000	1	0	0	0	0	1990000	1	0	0	2610000	1	0	0	0	0	0	0	0	0	0	0	0	0
88	QZT32954.1	2-oxoacid:acceptor oxidoreductase subunit alpha [Caldalkalibacillus thermarum TA2.A1]	141000000	6	44600000	3	91200000	6	31000000	6	130000000	6	116000000	3	148000000	7	79600000	5	128000000	4	58300000	3	77800000	5	83400000	7	427000000	15	286000000	14	577000000	18	292000000	13	82200000	3	243000000	9	0	0	44000000	4	1600000000	41
89	QZT35419.1	ribonuclease Y [Caldalkalibacillus thermarum TA2.A1]	274000000	3	68400000	3	60600000	2	75800000	3	283000000	2	297000000	6	146000000	3	143000000	4	48100000	3	66700000	4	341000000	14	353000000	13	520000000	10	507000000	16	350000000	13	398000000	13	24900000	1	352000000	12	116000000	3	326000000	5	283000000	25
90	QZT34427.1	50S ribosomal protein L16 [Caldalkalibacillus thermarum TA2.A1]	440000000	5	420000000	5	174000000	5	138000000	4	260000000	4	268000000	4	165000000	4	174000000	4	56500000	4	120000000	4	180000000	2	157000000	2	444000000	4	451000000	5	497000000	4	358000000	4	141000000	4	201000000	2	0	0	0	0	108000000	6
91	QZT33267.1	hypothetical protein HUR95_13355 [Caldalkalibacillus thermarum TA2.A1]	157000000	5	146000000	5	99000000	3	78800000	4	91300000	3	117000000	3	88800000	3	75100000	4	60000000	3	26400000	2	41700000	3	24000000	3	23900000	2	19900000	2	55800000	2	38100000	3	0	0	0	0	13200000	1	206000000	2	80900000	12
92	QZT34248.1	alanine dehydrogenase [Caldalkalibacillus thermarum TA2.A1]	221000000	7	183000000	5	196000000	6	178000000	7	95500000	5	70900000	4	137000000	5	60100000	4	341000000	6	294000000	6	337000000	9	283000000	8	489000000	12	345000000	9	710000000	10	560000000	11	0	0	69800000	4	42100000	2	28500000	3	7250000000	28
93	QZT34535.1	glutamate 5-kinase [Caldalkalibacillus thermarum TA2.A1]	49900000	7	21800000	5	6320000	2	2680000	2	12900000	3	6920000	2	6230000	2	2070000	1	19700000	4	17800000	2	0	0	5300000	3	3340000	1	3930000	2	26000000	4	22200000	4	0	0	10300000	2	0	0	6770000	1	70000000	11
94	QZT35194.1	DUF4352 domain-containing protein [Caldalkalibacillus thermarum TA2.A1]	490000000	6	232000000	5	495000000	4	144000000	4	461000	1	8500000	2	206000000	5	160000000	5	665000000	5	469000000	3	66900000	1	71500000	1	422000000	7	760000000	5	1140000000	6	933000000	6	2470000000	10	289000000	1	951000000	6	0	0	74000000	6
95	QZT34352.1	peptidylprolyl isomerase [Caldalkalibacillus thermarum TA2.A1]	162000000	7	129000000	6	83600000	4	66700000	5	138000000	6	123000000	6	57600000	5	70400000	7	83800000	6	63700000	4	0	1	6240000	2	73800000	6	59200000	5	98500000	7	105000000	6	0	0	43500000	3	42900000	1	57700000	4	28000000	8
96	QZT33861.1	SsrA-binding protein SmpB [Caldalkalibacillus thermarum TA2.A1]	88900000	5	64700000	4	56700000	5	39200000	4	53900000	5	42700000	4	22300000	3	39500000	5	36200000	3	25800000	3	0	0	0	0	22300000	3	22200000	3	91300000	4	19200000	1	2080000	1	0	0	0	0	31000000	4	4800000	1
97	QZT32659.1	1-deoxy-D-xylulose-5-phosphate synthase [Caldalkalibacillus thermarum TA2.A1]	200000000	8	148000000	12	159000000	8	129000000	8	200000000	11	158000000	11	174000000	10	87900000	5	191000000	9	223000000	12	136000000	13	103000000	12	250000000	13	243000000	16	457000000	19	326000000	15	20900000	2	7590000	2	7700000	1	73100000	6	167000000	29
98	QZT33839.1	acyl-CoA dehydrogenase family protein [Caldalkalibacillus thermarum TA2.A1]	72800000	6	43700000	4	104000000	6	116000000	7	44000000	6	40900000	7	72700000	7	44700000	4	156000000	5	113000000	3	140000000	9	151000000	9	107000000	9	87200000	9	239000000	18	173000000	13	84300000	4	142000000	7	42000000	2	47500000	6	1880000000	49
99	QZT33257.1	YugN-like family protein [Caldalkalibacillus thermarum TA2.A1]	2700000000	6	2430000000	4	2220000000	3	1940000000	5	2300000000	4	2020000000	6	1750000000	4	1540000000	4	1590000000	4	1230000000	3	0	0	39500000	2	29600000	2	31400000	2	238000000	3	208000000	3	65900000	3	326000000	4	1130000000	14	2090000000	4	107000000	5
100	QZT33032.1	succinate--CoA ligase subunit alpha [Caldalkalibacillus thermarum TA2.A1]	151000000	6	206000000	8	388000000	7	320000000	7	161000000	6	197000000	8	318000000	8	270000000	6	356000000	6	361000000	7	551000000	9	567000000	10	523000000	9	683000000	10	848000000	9	593000000	8	0	0	569000000	4	16000000	1	130000000	4	1450000000	19
101	QZT33847.1	uroporphyrinogen decarboxylase [Caldalkalibacillus thermarum TA2.A1]	58100000	5	42300000	5	61500000	6	39500000	5	25100000	3	15800000	4	28400000	3	17400000	4	10700000	6	4640000	2	18000000	1	21800000	3	89100000	4	33300000	5	110000000	7	92900000	4	0	0	0	0	0	0	11900000	1	88700000	13
102	QZT33744.1	metal ABC transporter ATP-binding protein [Caldalkalibacillus thermarum TA2.A1]	313000000	6	207000000	6	222000000	7	114000000	4	169000000	7	162000000	7	190000000	5	122000000	4	104000000	5	155000000	3	222000000	7	184000000	6	291000000	10	192000000	6	284000000	11	450000000	12	21700000	1	408000000	6	13700000	1	214000000	5	129000000	17
103	QZT33293.1	ectoine/hydroxyectoine ABC transporter substrate-binding protein EhuB [Caldalkalibacillus thermarum TA2.A1]	32800000	6	17900000	5	7620000	2	2450000	1	0	0	0	0	2260000	1	8270000	3	0	0	4690000	2	0	0	0	0	0	0	2570000	1	21300000	4	24600000	5	0	0	0	0	0	0	0	0	0	0
104	QZT32814.1	3-oxoacyl-[acyl-carrier-protein] reductase [Caldalkalibacillus thermarum TA2.A1]	579000000	5	558000000	5	332000000	4	336000000	3	372000000	10	274000000	5	255000000	4	273000000	4	390000000	7	246000000	7	772000000	9	746000000	9	410000000	8	691000000	10	1090000000	10	1070000000	11	212000000	4	563000000	6	296000000	3	537000000	7	226000000	12
105	QZT32960.1	DUF4115 domain-containing protein [Caldalkalibacillus thermarum TA2.A1]	286000000	3	225000000	3	222000000	4	164000000	4	120000000	4	115000000	4	174000000	3	118000000	3	149000000	3	83900000	3	118000000	4	107000000	4	233000000	6	234000000	6	201000000	7	162000000	6	21200000	1	0	0	38500000	1	49900000	2	28500000	7
106	QZT32931.1	UPF0182 family protein [Caldalkalibacillus thermarum TA2.A1]	73100000	9	116000000	8	52000000	8	88300000	9	104000000	11	32300000	7	124000000	10	27800000	7	42200000	6	103000000	8	0	0	0	0	0	0	0	0	95600000	9	32200000	7	0	0	0	0	0	0	7860000	1	853000	8
107	QZT33245.1	DoxX family protein [Caldalkalibacillus thermarum TA2.A1]	1520000000	5	1300000000	5	987000000	5	864000000	4	1430000000	5	1300000000	5	909000000	5	813000000	3	595000000	4	476000000	3	0	0	0	0	0	0	0	0	3050000	1	2370000	1	0	0	0	0	0	0	2180000000	3	21500000	4
108	QZT35443.1	Crp/Fnr family transcriptional regulator [Caldalkalibacillus thermarum TA2.A1]	99200000	8	72100000	7	83600000	5	75200000	8	66200000	6	36100000	5	83200000	6	44600000	5	62600000	5	45800000	4	95800000	2	94200000	6	426000000	9	300000000	6	516000000	9	328000000	7	7830000	1	0	0	0	0	24300000	1	39100000	9
109	QZT33402.1	translation elongation factor 4 [Caldalkalibacillus thermarum TA2.A1]	124000000	8	114000000	6	15200000	3	6860000	2	24200000	3	23600000	5	32000000	6	31300000	5	39200000	6	400000	1	49500000	4	31600000	7	35600000	7	44300000	6	102000000	7	55500000	7	0	0	43700000	2	0	0	4850000	2	55800000	19
110	QZT34127.1	TRAP transporter substrate-binding protein [Caldalkalibacillus thermarum TA2.A1]	161000000	6	163000000	5	145000000	4	116000000	4	27200000	3	31200000	3	166000000	5	75000000	7	96700000	3	72300000	2	0	0	0	0	23000000	3	21700000	4	1390000000	11	910000000	11	0	1	37600000	2	98400000	1	26700000	2	94800000	15
111	QZT34898.1	aconitate hydratase AcnA [Caldalkalibacillus thermarum TA2.A1]	143000000	9	99900000	8	186000000	11	153000000	9	118000000	10	81600000	12	101000000	8	79700000	11	158000000	8	112000000	7	154000000	12	146000000	10	162000000	11	155000000	12	334000000	15	360000000	15	91400000	3	362000000	12	0	0	66900000	4	2440000000	50
112	QZT34257.1	inositol-3-phosphate synthase [Caldalkalibacillus thermarum TA2.A1]	55100000	6	49100000	7	59900000	5	58100000	8	17300000	3	13600000	3	35100000	4	44800000	8	130000000	10	81900000	7	6180000	1	4130000	2	61600000	8	45300000	6	112000000	8	92100000	9	128000000	5	198000000	6	141000000	2	28400000	3	3140000000	33
113	QZT33399.1	molecular chaperone DnaK [Caldalkalibacillus thermarum TA2.A1]	130000000	7	119000000	9	65700000	5	87600000	10	137000000	11	112000000	11	133000000	9	93200000	10	50000000	8	23900000	3	141000000	8	55500000	4	227000000	16	144000000	13	506000000	20	388000000	17	119000000	2	829000000	14	0	0	777000000	15	2090000000	43
114	QZT33756.1	Fe-S cluster assembly protein SufB [Caldalkalibacillus thermarum TA2.A1]	98400000	7	23800000	6	54800000	4	20200000	4	38300000	6	78900000	7	15100000	3	49900000	7	99000000	9	66700000	5	111000000	6	111000000	7	152000000	7	137000000	5	286000000	14	178000000	10	15100000	1	54300000	4	28600000	2	39300000	8	3130000000	36
115	QZT35208.1	lysophospholipase [Caldalkalibacillus thermarum TA2.A1]	144000000	5	76500000	4	70100000	4	68500000	5	799000	1	27700000	2	45100000	5	58300000	6	39500000	4	42800000	4	4440000	2	11800000	2	4630000	2	2000000	1	34900000	7	34200000	5	0	0	19000000	2	0	0	0	0	43700000	12
116	QZT34413.1	DNA-directed RNA polymerase subunit beta [Caldalkalibacillus thermarum TA2.A1]	50400000	6	44100000	7	24600000	4	17900000	5	39400000	4	19600000	4	29900000	5	25300000	4	42100000	4	28300000	4	89500000	6	105000000	9	76300000	9	75900000	11	327000000	22	310000000	23	4880000	2	120000000	8	0	0	0	0	1110000000	64
117	QZT34423.1	50S ribosomal protein L2 [Caldalkalibacillus thermarum TA2.A1]	1600000000	7	1270000000	5	708000000	5	705000000	5	796000000	6	702000000	8	601000000	5	518000000	6	520000000	4	483000000	6	1700000000	13	1200000000	13	1910000000	18	1710000000	17	2430000000	14	1970000000	12	60800000	1	2140000000	11	0	0	349000000	4	564000000	17
118	QZT32581.1	UDP-N-acetylmuramoyl-tripeptide--D-alanyl-D-alanine ligase [Caldalkalibacillus thermarum TA2.A1]	69500000	7	35600000	5	33300000	6	34600000	5	11600000	3	20200000	3	47200000	6	11700000	4	57200000	4	23600000	3	12500000	2	22700000	2	69300000	8	99100000	11	98100000	10	71100000	9	0	0	0	0	0	0	0	0	260000000	21
119	QZT32819.1	signal recognition particle-docking protein FtsY [Caldalkalibacillus thermarum TA2.A1]	55200000	4	33500000	4	21500000	1	23100000	3	65100000	4	85600000	5	20800000	2	34700000	2	18100000	2	6310000	3	49700000	5	9000000	2	107000000	5	123000000	6	218000000	10	147000000	8	39900000	1	86100000	5	0	0	18400000	1	70700000	11
120	QZT33515.1	SPOR domain-containing protein [Caldalkalibacillus thermarum TA2.A1]	91900000	5	62400000	3	37800000	4	42600000	5	48000000	6	12500000	3	30000000	4	28900000	7	34500000	3	33100000	3	9570000	3	5980000	2	21100000	2	35200000	3	92200000	6	113000000	6	0	0	75100000	3	18900000	2	20100000	1	188000	1
121	QZT32976.1	polyribonucleotide nucleotidyltransferase [Caldalkalibacillus thermarum TA2.A1]	101000000	10	108000000	9	52400000	4	47800000	4	11700000	2	10600000	3	44400000	9	11300000	5	108000000	4	71700000	4	27000000	5	47900000	5	76200000	8	54800000	5	165000000	10	111000000	9	12800000	1	108000000	8	32900000	3	49300000	4	351000000	36
122	QZT35121.1	enoyl-ACP reductase FabI [Caldalkalibacillus thermarum TA2.A1]	209000000	7	182000000	5	483000000	6	445000000	6	242000000	7	234000000	7	233000000	6	183000000	5	629000000	7	284000000	6	236000000	11	293000000	14	396000000	15	400000000	13	862000000	13	721000000	15	155000000	3	461000000	4	39200000	4	0	0	479000000	20
123	QZT35340.1	acetyl-CoA carboxylase carboxyl transferase subunit alpha [Caldalkalibacillus thermarum TA2.A1]	234000000	4	85300000	5	117000000	3	103000000	3	88000000	3	46900000	6	94600000	4	77200000	3	0	0	63400000	3	147000000	6	136000000	6	126000000	7	98500000	8	144000000	10	70200000	7	14500000	1	113000000	4	14600000	1	166000000	4	251000000	15
124	QZT33346.1	pyruvate dehydrogenase (acetyl-transferring) E1 component subunit alpha [Caldalkalibacillus thermarum TA2.A1]	344000000	5	202000000	4	122000000	4	109000000	4	8980000	1	0	1	98700000	4	70800000	4	85300000	6	18700000	2	32100000	3	48700000	5	334000000	12	364000000	10	470000000	10	501000000	12	389000000	7	271000000	5	34900000	3	14200000	1	2050000000	23
125	QZT33207.1	2-oxoacid:acceptor oxidoreductase family protein [Caldalkalibacillus thermarum TA2.A1]	81100000	5	52100000	4	79900000	4	48700000	4	91000000	6	124000000	8	59700000	5	50400000	4	81100000	6	52300000	7	77800000	5	75000000	7	145000000	9	107000000	8	287000000	9	227000000	11	38500000	4	0	0	36100000	1	10200000	1	0	0
126	QZT33320.1	aldehyde ferredoxin oxidoreductase family protein [Caldalkalibacillus thermarum TA2.A1]	75600000	7	38900000	4	164000000	9	37200000	5	256000000	11	212000000	11	146000000	9	34200000	5	110000000	8	119000000	10	352000000	11	344000000	14	566000000	19	500000000	16	814000000	17	628000000	18	348000000	6	78800000	6	32800000	1	89200000	7	454000000	33
127	QZT34145.1	rod shape-determining protein [Caldalkalibacillus thermarum TA2.A1]	142000000	5	101000000	3	65300000	3	53700000	2	113000000	2	93800000	2	43000000	3	43700000	4	35600000	2	42300000	2	178000000	6	279000000	8	393000000	12	487000000	10	503000000	10	414000000	9	33700000	1	165000000	4	18900000	1	319000000	3	216000000	17
128	QZT32794.1	DUF370 domain-containing protein [Caldalkalibacillus thermarum TA2.A1]	134000000	3	126000000	3	28800000	2	24700000	2	98900000	2	103000000	2	21700000	2	46300000	3	30600000	2	67700000	2	188000000	2	180000000	2	140000000	2	168000000	2	251000000	4	178000000	3	0	0	13600000	1	136000000	2	0	0	27800000	3
129	QZT33620.1	electron transfer flavoprotein subunit alpha/FixB family protein [Caldalkalibacillus thermarum TA2.A1]	40400000	4	24300000	2	24800000	3	44500000	5	16400000	2	8340000	1	29200000	5	16900000	5	4650000	3	3760000	1	83800000	7	73600000	5	93300000	8	96000000	9	121000000	10	86000000	9	0	0	9540000	2	10800000	1	0	0	269000000	13
130	QZT32695.1	glycine cleavage system aminomethyltransferase GcvT [Caldalkalibacillus thermarum TA2.A1]	53200000	5	16500000	3	42700000	3	14800000	2	10900000	3	15800000	4	23300000	3	24200000	4	21000000	2	12300000	2	29900000	3	856000	1	47300000	7	45200000	5	72000000	6	57100000	6	0	0	0	0	0	0	9340000	1	212000000	26
131	QZT33862.1	ribonuclease R [Caldalkalibacillus thermarum TA2.A1]	61400000	5	59100000	6	33200000	5	25700000	3	33100000	3	22900000	4	24900000	4	8990000	5	31600000	5	4330000	1	108000000	10	103000000	7	76800000	8	55200000	6	124000000	13	89100000	8	0	0	31200000	4	0	0	18000000	1	47000000	17
132	QZT34813.1	TAXI family TRAP transporter solute-binding subunit [Caldalkalibacillus thermarum TA2.A1]	168000000	5	122000000	5	125000000	6	56100000	4	0	0	0	0	62300000	4	29200000	3	31000000	4	1560000	1	0	0	0	0	73300000	4	78900000	4	204000000	4	66900000	4	208000000	5	29700000	1	153000000	2	0	0	62500000	6
133	QZT34194.1	class II fructose-1 6-bisphosphate aldolase [Caldalkalibacillus thermarum TA2.A1]	257000000	6	173000000	6	374000000	6	343000000	6	308000000	7	239000000	7	280000000	8	165000000	5	283000000	5	260000000	5	206000000	6	174000000	7	518000000	15	414000000	14	612000000	14	497000000	12	3390000	1	551000000	7	37700000	2	96800000	3	5190000000	25
134	QZT33205.1	TIGR04053 family radical SAM/SPASM domain-containing protein [Caldalkalibacillus thermarum TA2.A1]	148000000	4	123000000	4	123000000	4	100000000	3	181000000	5	156000000	4	145000000	5	120000000	4	155000000	5	138000000	5	227000000	9	242000000	10	368000000	11	186000000	8	598000000	13	521000000	12	170000000	5	63000000	3	122000000	3	122000000	1	0	1
135	QZT33521.1	Flp pilus assembly complex ATPase component TadA [Caldalkalibacillus thermarum TA2.A1]	90000000	7	73700000	6	48000000	4	74100000	5	77300000	5	82800000	4	71800000	4	98100000	5	129000000	6	40800000	4	122000000	10	169000000	12	237000000	14	202000000	15	283000000	19	221000000	14	0	0	26000000	2	9290000	1	43400000	4	22300000	11
136	QZT34283.1	redox-regulated ATPase YchF [Caldalkalibacillus thermarum TA2.A1]	37400000	4	14700000	2	66300000	4	51400000	5	35400000	4	21900000	3	30100000	3	22300000	3	36000000	3	11000000	2	137000000	5	88300000	5	115000000	7	86700000	7	99300000	6	81000000	7	0	0	7400000	1	0	0	7250000	1	136000000	17
137	QZT34453.1	50S ribosomal protein L13 [Caldalkalibacillus thermarum TA2.A1]	210000000	4	238000000	4	49300000	2	43900000	2	154000000	4	177000000	4	77500000	2	44100000	2	106000000	4	86400000	3	209000000	5	256000000	6	656000000	7	554000000	8	591000000	6	447000000	6	53900000	1	972000000	5	0	0	44000000	1	77300000	8
138	QZT34990.1	phosphonate ABC transporter ATP-binding protein [Caldalkalibacillus thermarum TA2.A1]	69200000	5	70000000	5	114000000	7	67000000	7	81400000	5	77700000	7	64000000	5	38000000	6	39400000	5	40100000	7	0	0	2110000	1	5540000	3	1670000	1	26900000	2	18600000	4	0	0	34900000	4	9190000	2	29100000	4	2220000	4
139	QZT33809.1	plasmid pRiA4b ORF-3 family protein [Caldalkalibacillus thermarum TA2.A1]	29100000	6	23400000	4	36100000	5	32900000	6	14200000	3	14400000	5	26900000	6	26500000	6	25800000	4	26500000	4	9010000	1	76200000	7	50400000	7	64300000	8	131000000	11	121000000	12	20500000	2	24900000	3	0	0	4740000	1	11300000	8
140	QZT33344.1	2-oxo acid dehydrogenase subunit E2 [Caldalkalibacillus thermarum TA2.A1]	783000000	7	746000000	8	484000000	6	467000000	7	407000000	7	281000000	7	405000000	7	364000000	7	482000000	8	392000000	7	559000000	10	544000000	10	877000000	13	675000000	13	866000000	15	631000000	15	358000000	6	1500000000	14	42900000	3	200000000	8	5100000000	31
141	QZT33369.1	GTPase Era [Caldalkalibacillus thermarum TA2.A1]	284000000	5	246000000	6	161000000	3	145000000	3	157000000	6	207000000	7	192000000	5	182000000	7	200000000	6	164000000	3	406000000	8	344000000	9	436000000	11	540000000	12	787000000	12	435000000	11	242000000	5	88800000	5	0	0	78300000	4	125000000	17
142	QZT33867.1	FAD-dependent oxidoreductase [Caldalkalibacillus thermarum TA2.A1]	90100000	3	70300000	4	139000000	7	97600000	3	187000000	6	146000000	4	120000000	4	100000000	4	117000000	5	91700000	2	31200000	2	44200000	4	27800000	2	32500000	3	55400000	4	99000000	4	17000000	1	72000000	6	2070000	1	93500000	5	1800000000	21
143	QZT33499.1	GTPase ObgE [Caldalkalibacillus thermarum TA2.A1]	97500000	4	93700000	4	50400000	2	60900000	3	7380000	1	6910000	1	17800000	1	16000000	1	40600000	4	53400000	4	61700000	10	52600000	6	52100000	6	41000000	6	150000000	11	90300000	9	9500000	1	43000000	4	0	1	2680000	1	62800000	12
144	QZT34924.1	glycine/betaine ABC transporter [Caldalkalibacillus thermarum TA2.A1]	480000000	2	304000000	2	301000000	2	170000000	2	97400000	2	71000000	2	192000000	2	97400000	1	194000000	2	141000000	2	0	0	0	1	124000000	3	13700000	3	131000000	2	96600000	3	407000000	4	268000000	1	29300000	1	237000000	1	131000000	6
145	QZT33813.1	extracellular solute-binding protein [Caldalkalibacillus thermarum TA2.A1]	53700000	7	20200000	4	11100000	2	8180000	3	14400000	2	12200000	3	4510000	2	592000	1	192000000	10	155000000	7	0	0	0	0	396000	1	0	0	287000000	14	200000000	13	170000000	6	245000000	4	0	0	0	0	91300000	19
146	QZT34414.1	DNA-directed RNA polymerase subunit beta' [Caldalkalibacillus thermarum TA2.A1]	34400000	6	12800000	3	44900000	4	30200000	3	2880000	4	10500000	1	19800000	6	2300000	1	89700000	8	68300000	7	35800000	10	32700000	6	27400000	9	24900000	5	127000000	14	121000000	16	661000	1	13800000	4	2710000	1	1710000	1	1370000000	71
147	QZT33812.1	tryptophanase [Caldalkalibacillus thermarum TA2.A1]	53500000	5	40700000	5	39800000	6	36400000	6	38400000	7	42400000	6	38800000	3	51000000	7	35300000	4	28200000	4	1920000	1	14600000	3	58900000	8	81100000	7	106000000	7	51600000	7	0	0	0	0	0	0	0	1	1060000000	32
148	QZT34447.1	30S ribosomal protein S11 [Caldalkalibacillus thermarum TA2.A1]	437000000	4	212000000	4	210000000	1	223000000	1	167000000	3	166000000	4	176000000	1	178000000	1	189000000	2	233000000	3	1170000000	6	809000000	4	1230000000	11	1070000000	8	1000000000	8	792000000	8	0	0	2220000000	7	43900000	1	636000000	4	219000000	11
149	QZT32715.1	chorismate synthase [Caldalkalibacillus thermarum TA2.A1]	111000000	5	80000000	5	131000000	4	109000000	3	80100000	5	44300000	3	83200000	5	64200000	5	115000000	3	84600000	4	159000000	7	120000000	8	189000000	7	188000000	9	275000000	10	158000000	6	76500000	1	66200000	3	12800000	1	6780000	1	86900000	14
150	QZT33343.1	dihydrolipoyl dehydrogenase [Caldalkalibacillus thermarum TA2.A1]	159000000	5	134000000	5	217000000	8	110000000	5	215000000	6	185000000	9	96600000	6	88300000	8	790000000	11	595000000	7	142000000	8	174000000	10	223000000	12	185000000	13	3090000000	21	2710000000	21	1010000000	9	1660000000	18	113000000	4	142000000	12	4470000000	32
151	QZT32816.1	beta-ketoacyl-ACP synthase II [Caldalkalibacillus thermarum TA2.A1]	23800000	5	6620000	4	7760000	5	2470000	2	13200000	3	20000000	6	0	1	2370000	2	3140000	2	0	1	0	0	0	0	8070000	2	19000000	3	20600000	2	8940000	1	0	0	0	1	0	0	9170000	1	445000000	29
152	QZT33141.1	response regulator transcription factor [Caldalkalibacillus thermarum TA2.A1]	203000000	6	179000000	5	180000000	4	147000000	5	179000000	2	62200000	3	117000000	5	129000000	6	127000000	4	165000000	5	0	0	7410000	1	167000000	4	140000000	4	143000000	5	195000000	6	2950000	1	54400000	4	0	0	63600000	5	243000000	16
153	QZT32733.1	zinc metallopeptidase [Caldalkalibacillus thermarum TA2.A1]	1870000000	3	959000000	3	945000000	2	868000000	2	46800000	3	473000000	3	958000000	2	581000000	2	370000000	2	118000000	1	317000000	5	253000000	3	238000000	4	168000000	3	304000000	5	238000000	5	0	0	0	0	706000000	1	0	0	11300000	4
154	QZT33431.1	efflux RND transporter permease subunit [Caldalkalibacillus thermarum TA2.A1]	69500000	3	57000000	3	49000000	3	39400000	3	9860000	2	13500000	2	21200000	2	26000000	3	39800000	3	34900000	2	66600000	7	54900000	5	38300000	2	37900000	5	66700000	6	57400000	5	3590000	1	0	0	6070000	1	0	0	1210000	3
155	QZT34347.1	ribose-phosphate diphosphokinase [Caldalkalibacillus thermarum TA2.A1]	203000000	5	238000000	5	268000000	6	150000000	4	139000000	9	175000000	8	168000000	4	97000000	4	288000000	6	289000000	7	880000000	11	870000000	13	933000000	12	1060000000	12	1380000000	11	885000000	10	53100000	2	875000000	8	0	0	291000000	5	610000000	20
156	QZT34436.1	50S ribosomal protein L18 [Caldalkalibacillus thermarum TA2.A1]	92200000	4	134000000	5	6310000	1	11900000	2	123000000	4	132000000	5	50600000	3	37900000	2	21100000	1	30100000	3	290000000	7	260000000	9	315000000	8	236000000	7	286000000	5	313000000	6	85200000	2	151000000	6	31100000	1	138000000	5	184000000	8
157	QZT33763.1	methionine ABC transporter ATP-binding protein [Caldalkalibacillus thermarum TA2.A1]	206000000	5	175000000	4	151000000	5	109000000	4	64500000	5	37300000	3	109000000	4	64600000	4	80300000	5	86900000	2	83900000	6	77400000	8	135000000	11	123000000	9	147000000	10	153000000	11	15400000	1	1450000	1	0	0	47400000	6	171000000	15
158	QZT35414.1	cytochrome ubiquinol oxidase subunit I [Caldalkalibacillus thermarum TA2.A1]	68300000	2	28100000	1	23600000	1	28000000	1	0	0	8020000	1	17800000	2	6290000	1	0	0	0	0	0	0	0	0	0	0	0	0	0	0	0	0	229000000	3	0	0	0	0	0	0	7990000	3
159	QZT33829.1	cobyric acid synthase [Caldalkalibacillus thermarum TA2.A1]	82900000	6	71400000	6	61800000	3	24000000	3	80700000	6	47300000	4	55500000	3	57700000	7	59200000	5	52500000	3	340000000	11	346000000	14	366000000	13	364000000	15	502000000	22	382000000	16	263000000	9	37500000	3	33700000	1	933000	1	365000000	28
160	QZT33594.1	succinate dehydrogenase iron-sulfur subunit [Caldalkalibacillus thermarum TA2.A1]	253000000	3	243000000	4	233000000	4	188000000	4	86500000	2	97900000	4	123000000	2	129000000	3	1130000000	6	1150000000	6	84400000	4	96500000	4	137000000	8	117000000	6	2130000000	11	1870000000	15	9560000	1	1690000000	11	0	0	147000000	7	499000000	17
161	QZT32806.1	Asp23/Gls24 family envelope stress response protein [Caldalkalibacillus thermarum TA2.A1]	28200000	3	3380000	1	10500000	1	21700000	3	44400000	4	23700000	2	25200000	2	6240000	2	12600000	2	14900000	3	15000000	2	77900000	4	83900000	3	53500000	3	135000000	5	86900000	6	0	0	0	0	0	0	25300000	1	25100000	4
162	QZT34888.1	2-oxoglutarate dehydrogenase E1 component [Caldalkalibacillus thermarum TA2.A1]	209000000	6	94800000	5	91400000	4	84100000	5	106000000	5	107000000	4	73300000	4	53200000	3	266000000	10	306000000	13	166000000	5	131000000	4	190000000	5	195000000	5	1250000000	29	1030000000	30	107000000	3	53200000	5	0	0	0	0	148000000	35
163	QZT33091.1	TAXI family TRAP transporter solute-binding subunit [Caldalkalibacillus thermarum TA2.A1]	84800000	4	130000000	5	78100000	4	36700000	3	0	1	0	0	52900000	3	21200000	2	40100000	3	11100000	2	0	0	0	0	55300000	2	28500000	1	595000000	4	358000000	4	341000000	7	366000000	1	91100000	3	72100000	1	427000000	8
164	QZT34197.1	cobalamin-dependent protein [Caldalkalibacillus thermarum TA2.A1]	63300000	8	62600000	10	75000000	9	76000000	9	107000000	14	37600000	9	56300000	9	52500000	13	65200000	8	52800000	8	136000000	9	143000000	9	198000000	19	131000000	17	189000000	19	173000000	17	81000000	5	37600000	4	0	0	23500000	3	47300000	29
165	QZT33150.1	6 7-dimethyl-8-ribityllumazine synthase [Caldalkalibacillus thermarum TA2.A1]	28100000	5	30400000	3	8650000	1	13300000	2	0	0	7750000	3	20100000	3	4030000	1	10200000	2	0	0	29400000	2	19800000	1	39300000	3	0	0	44300000	2	84900000	3	0	0	105000000	2	0	0	7670000	1	562000000	11
166	QZT33638.1	diaminopimelate epimerase [Caldalkalibacillus thermarum TA2.A1]	39800000	5	18200000	3	26100000	4	41700000	6	20600000	4	41700000	5	52500000	6	40200000	5	33200000	5	36000000	3	230000	1	16200000	2	70900000	6	50200000	6	75800000	7	61300000	6	0	0	0	0	0	0	0	0	177000000	14
167	QZT32894.1	thiol reductant ABC exporter subunit CydD [Caldalkalibacillus thermarum TA2.A1]	147000000	6	106000000	7	98800000	5	70000000	6	136000000	9	49800000	6	89400000	5	104000000	10	64500000	5	49200000	4	52000000	5	64000000	7	106000000	8	87100000	7	98100000	8	164000000	11	29300000	1	13100000	1	0	0	23900000	2	4640000	4
168	QZT34335.1	16S rRNA (cytidine(1402)-2'-O)-methyltransferase [Caldalkalibacillus thermarum TA2.A1]	32900000	6	44600000	4	16000000	2	228000	1	0	0	0	0	3850000	2	2900000	2	45900000	5	38000000	3	38200000	1	38600000	1	37900000	3	42600000	2	30500000	2	31400000	5	0	0	66500000	2	0	0	2220000	1	108000000	17
169	QZT34454.1	30S ribosomal protein S9 [Caldalkalibacillus thermarum TA2.A1]	240000000	5	230000000	4	157000000	4	107000000	4	352000000	5	302000000	5	190000000	6	136000000	3	70900000	3	163000000	5	1790000000	6	1750000000	7	1930000000	7	1790000000	7	1600000000	6	948000000	6	218000000	2	1520000000	12	179000000	5	786000000	7	393000000	11
170	QZT34408.1	50S ribosomal protein L11 [Caldalkalibacillus thermarum TA2.A1]	114000000	4	85300000	4	32900000	1	5290000	1	62700000	3	56900000	4	33300000	2	27800000	1	31600000	2	28500000	2	165000000	4	171000000	5	176000000	3	165000000	4	717000000	4	608000000	3	51800000	1	114000000	2	103000000	2	176000000	2	206000000	6
171	QZT35416.1	type I glutamate--ammonia ligase [Caldalkalibacillus thermarum TA2.A1]	66100000	4	38000000	4	59600000	4	34000000	3	20600000	4	5480000	3	35900000	6	21400000	3	89200000	5	82100000	4	160000000	6	171000000	8	108000000	7	105000000	6	222000000	9	165000000	8	22600000	3	126000000	5	0	0	35300000	4	3790000000	31
172	QZT32921.1	GerMN domain-containing protein [Caldalkalibacillus thermarum TA2.A1]	913000000	2	706000000	2	663000000	2	587000000	3	416000000	2	386000000	2	426000000	2	352000000	2	471000000	2	350000000	2	0	0	0	0	15200000	1	0	0	484000000	3	431000000	2	474000000	3	379000000	1	13700000	1	221000000	2	28300000	3
173	QZT34941.1	acetyl-CoA carboxylase carboxyltransferase subunit beta [Caldalkalibacillus thermarum TA2.A1]	75700000	3	29700000	3	9620000	2	24400000	2	41400000	3	37800000	3	25300000	2	20700000	2	81500000	5	79600000	4	81800000	4	79800000	4	62600000	3	76700000	4	107000000	7	113000000	8	0	0	38700000	2	38000000	1	0	0	163000000	20
174	QZT33398.1	molecular chaperone DnaJ [Caldalkalibacillus thermarum TA2.A1]	195000000	4	100000000	3	118000000	3	105000000	3	80000000	3	31000000	2	94000000	4	101000000	4	54800000	2	99500000	3	693000000	5	691000000	5	687000000	8	731000000	9	878000000	8	697000000	6	34600000	3	121000000	2	13100000	1	0	0	62000000	9
175	QZT32706.1	HU family DNA-binding protein [Caldalkalibacillus thermarum TA2.A1]	214000000	3	194000000	4	167000000	5	104000000	3	111000000	3	89700000	4	127000000	3	110000000	4	167000000	4	134000000	5	283000000	6	247000000	6	220000000	6	160000000	5	208000000	8	192000000	5	0	0	846000000	5	0	0	290000000	6	244000000	10
176	QZT33400.1	heat-inducible transcriptional repressor HrcA [Caldalkalibacillus thermarum TA2.A1]	44500000	4	15800000	1	23800000	2	19900000	2	11400000	4	14700000	3	14400000	2	16100000	2	14400000	2	16100000	2	30500000	3	24200000	4	62700000	7	55100000	7	67600000	6	67400000	8	0	0	0	0	0	0	0	0	0	0
177	QZT34784.1	Na/Pi cotransporter family protein [Caldalkalibacillus thermarum TA2.A1]	176000000	4	153000000	5	88800000	5	78900000	4	100000000	4	99000000	5	92800000	4	82600000	5	62400000	4	44300000	1	49000000	4	40600000	2	69100000	5	46200000	6	96100000	7	64800000	5	0	0	30800000	3	309000	1	20900000	1	16600000	6
178	QZT34437.1	30S ribosomal protein S5 [Caldalkalibacillus thermarum TA2.A1]	174000000	4	95500000	3	60300000	3	43600000	2	192000000	4	161000000	4	88000000	4	57500000	3	119000000	5	111000000	5	1400000000	7	1270000000	6	1030000000	6	987000000	8	643000000	5	768000000	8	24200000	1	1060000000	6	12700000	1	244000000	3	376000000	9
179	QZT33208.1	pyruvate synthase [Caldalkalibacillus thermarum TA2.A1]	173000000	8	92000000	5	106000000	7	121000000	8	135000000	8	148000000	7	99300000	9	69500000	8	173000000	11	132000000	10	86400000	2	100000000	2	258000000	13	211000000	6	153000000	8	242000000	10	74500000	6	173000000	5	0	0	48600000	2	292000	2
180	QZT33611.1	helix-turn-helix transcriptional regulator [Caldalkalibacillus thermarum TA2.A1]	372000000	6	403000000	8	357000000	5	230000000	6	362000000	9	372000000	9	270000000	7	273000000	9	283000000	7	238000000	4	719000000	7	796000000	9	1380000000	18	1230000000	14	2450000000	19	1810000000	16	46500000	3	332000000	8	43600000	1	319000000	6	110000000	17
181	QZT33206.1	DUF2249 domain-containing protein [Caldalkalibacillus thermarum TA2.A1]	249000000	6	244000000	7	309000000	6	237000000	5	200000000	3	88300000	3	232000000	4	203000000	5	327000000	6	284000000	5	250000000	3	311000000	3	277000000	6	251000000	4	481000000	7	300000000	7	63600000	2	703000000	6	106000000	3	691000000	3	2150000	3
182	QZT34410.1	50S ribosomal protein L10 [Caldalkalibacillus thermarum TA2.A1]	99900000	3	108000000	4	44200000	2	6530000	1	58100000	4	42700000	3	6730000	1	5180000	1	5410000	1	0	0	391000000	5	416000000	7	344000000	4	414000000	5	425000000	5	399000000	6	75500000	3	347000000	5	16100000	1	137000000	2	248000000	11
183	QZT34395.1	PIN/TRAM domain-containing protein [Caldalkalibacillus thermarum TA2.A1]	87900000	2	68500000	2	22100000	1	26200000	3	27200000	3	15900000	2	61400000	3	41800000	2	45500000	4	34900000	3	25500000	2	53400000	2	56900000	5	40800000	1	89000000	4	76600000	4	0	0	93000000	2	17200000	1	25500000	3	31000000	7
184	QZT35091.1	cysteine desulfurase [Caldalkalibacillus thermarum TA2.A1]	88100000	5	52700000	3	91000000	4	48200000	6	39500000	4	16900000	3	47500000	5	34600000	3	55000000	5	34800000	3	20800000	2	29400000	3	54100000	5	71100000	6	172000000	9	187000000	10	13200000	1	42600000	2	0	0	29900000	4	14900000	10
185	QZT33335.1	superoxide dismutase [Caldalkalibacillus thermarum TA2.A1]	59400000	2	47900000	2	91000000	2	71000000	2	10100000	1	7070000	1	58000000	2	41900000	2	321000000	5	319000000	5	3370000	1	0	0	30100000	1	13300000	1	179000000	4	58900000	4	0	0	219000000	3	0	0	37100000	2	6820000000	19
186	QZT35380.1	elongation factor P [Caldalkalibacillus thermarum TA2.A1]	64100000	2	34400000	2	41600000	3	11400000	3	18100000	3	24600000	3	3610000	3	19000000	3	5420000	2	14300000	3	30800000	1	27100000	1	42000000	1	26800000	1	53200000	2	38400000	1	0	0	19600000	1	0	0	0	0	389000000	12
187	QZT34861.1	ABC transporter permease [Caldalkalibacillus thermarum TA2.A1]	113000000	2	109000000	2	68100000	2	7520000	2	89200000	1	102000000	2	82200000	3	67800000	2	54800000	3	4190000	1	17700000	1	24200000	3	10400000	2	33600000	3	129000000	3	207000000	4	0	0	0	0	24900000	2	0	0	17000000	5
188	QZT35248.1	fructose-6-phosphate aldolase [Caldalkalibacillus thermarum TA2.A1]	31900000	2	64300000	4	111000000	4	58300000	3	65400000	2	57600000	2	108000000	4	87100000	5	169000000	5	129000000	4	140000000	5	129000000	7	262000000	9	173000000	7	290000000	7	196000000	7	18500000	2	86400000	6	0	0	103000000	3	408000000	14
189	QZT32961.1	DUF3388 domain-containing protein [Caldalkalibacillus thermarum TA2.A1]	41700000	3	28500000	3	14300000	2	6400000	1	14500000	1	0	0	0	0	5650000	2	2740000	1	13800000	1	92400000	5	38300000	3	89600000	4	101000000	7	275000000	7	73400000	5	67900000	2	0	0	0	0	0	0	1630000	5
190	QZT34259.1	adenylosuccinate synthase [Caldalkalibacillus thermarum TA2.A1]	103000000	4	75800000	2	114000000	6	83600000	5	70000000	2	79100000	4	71500000	4	56700000	6	78400000	7	84900000	4	87000000	6	80300000	8	139000000	11	110000000	9	197000000	9	147000000	9	19700000	1	0	0	12400000	1	2060000	1	329000000	22
191	QZT32974.1	insulinase family protein [Caldalkalibacillus thermarum TA2.A1]	66200000	4	78100000	5	65800000	4	50700000	4	35200000	4	26100000	3	41400000	4	45500000	5	41900000	3	36200000	3	0	0	2080000	1	77500000	5	49900000	6	60200000	5	54300000	7	25200000	1	0	0	0	0	0	0	3650000	4
192	QZT32849.1	dihydroxy-acid dehydratase [Caldalkalibacillus thermarum TA2.A1]	39600000	4	35700000	4	39800000	3	36800000	4	35700000	7	35000000	6	32000000	5	19900000	3	38600000	5	27500000	4	21300000	3	1530000	2	5090000	2	15800000	3	48000000	6	24500000	4	0	0	12900000	3	0	0	9060000	1	1640000000	30
193	QZT33808.1	proline dehydrogenase [Caldalkalibacillus thermarum TA2.A1]	270000000	7	413000000	8	327000000	5	243000000	5	8300000	2	52900000	1	307000000	6	246000000	4	189000000	7	187000000	5	0	0	0	0	0	0	26200000	2	847000000	14	709000000	12	188000000	6	19300000	1	32400000	3	94400000	4	69800000	14
194	QZT34992.1	phenylalanine--tRNA ligase subunit beta [Caldalkalibacillus thermarum TA2.A1]	77400000	5	20800000	3	58000000	4	60400000	5	39600000	5	44000000	7	61600000	6	14000000	3	26600000	4	21400000	3	41600000	7	14600000	7	10100000	6	12200000	6	131000000	9	72700000	12	0	0	12300000	2	0	0	0	0	360000000	33
195	QZT33389.1	formate dehydrogenase accessory protein FdhE [Caldalkalibacillus thermarum TA2.A1]	16300000	4	27200000	4	30800000	5	23800000	5	30900000	3	46300000	3	32700000	6	18700000	7	33000000	6	7960000	3	7930000	1	66900000	2	65400000	8	78900000	7	108000000	6	79400000	5	7600000	1	0	0	0	0	11300000	2	0	0
196	QZT34948.1	malate dehydrogenase [Caldalkalibacillus thermarum TA2.A1]	67500000	4	46100000	3	100000000	2	77100000	3	19400000	3	0	0	32900000	3	36600000	3	127000000	3	57300000	2	15300000	2	46700000	5	19400000	2	61500000	4	141000000	4	116000000	4	57800000	1	49300000	3	11300000	2	39500000	1	1250000000	19
197	QZT34616.1	phosphoribosylformylglycinamidine synthase subunit PurL [Caldalkalibacillus thermarum TA2.A1]	47700000	6	41100000	7	70000000	8	57200000	7	90400000	8	71000000	6	52700000	6	39500000	8	52200000	6	45800000	5	277000000	14	236000000	15	235000000	14	284000000	17	395000000	21	246000000	17	35900000	3	0	0	7670000	1	0	0	118000000	23
198	QZT33531.1	glutamate-1-semialdehyde 2 1-aminomutase [Caldalkalibacillus thermarum TA2.A1]	91900000	5	64800000	4	79100000	3	120000000	5	60700000	4	38200000	6	47700000	3	41100000	3	32000000	2	79300000	4	69500000	2	74600000	2	51900000	4	81900000	5	316000000	11	138000000	7	44300000	3	0	0	28600000	1	9100000	1	1260000000	20
199	QZT34191.1	transcription termination factor Rho [Caldalkalibacillus thermarum TA2.A1]	72800000	4	59000000	4	31900000	3	22000000	3	77200000	4	54500000	3	10700000	3	25100000	4	35300000	3	17900000	2	151000000	12	151000000	9	154000000	13	189000000	11	280000000	12	261000000	14	2380000	1	128000000	7	0	0	54900000	2	72500000	17
200	QZT33374.1	PhoH family protein [Caldalkalibacillus thermarum TA2.A1]	19100000	3	24900000	3	18900000	2	9300000	2	13000000	2	9590000	3	9860000	2	13100000	3	10100000	3	15100000	3	18800000	2	4160000	2	45700000	3	34500000	3	55600000	3	31300000	4	54300000	4	0	0	0	0	0	0	8570000	6
201	QZT35387.1	methylmalonyl-CoA carboxyltransferase [Caldalkalibacillus thermarum TA2.A1]	93000000	5	74000000	7	69700000	8	47500000	5	18100000	2	39000000	5	52300000	7	46800000	5	40700000	4	38700000	6	88000000	7	43200000	3	14000000	2	57400000	6	167000000	11	135000000	10	0	0	63200000	3	0	0	0	0	64600000	19
202	QZT32496.1	cadmium-translocating P-type ATPase [Caldalkalibacillus thermarum TA2.A1]	22800000	4	7610000	2	4090000	1	1490000	2	10500000	2	35900000	3	15600000	3	29100000	4	17800000	4	2550000	2	19600000	1	20200000	1	24100000	2	20400000	1	35700000	4	36500000	3	0	0	62300000	6	11100000	1	39600000	3	0	0
203	QZT32674.1	2-oxo acid dehydrogenase subunit E2 [Caldalkalibacillus thermarum TA2.A1]	42100000	4	21000000	2	14000000	2	21300000	3	8450000	1	0	0	9430000	2	11600000	3	36000000	3	27900000	3	145000000	6	139000000	6	211000000	6	115000000	6	183000000	6	133000000	5	54500000	1	373000000	7	116000000	1	11500000	2	257000000	18
204	QZT34420.1	50S ribosomal protein L3 [Caldalkalibacillus thermarum TA2.A1]	38800000	4	87500000	4	20500000	4	50000000	3	132000000	5	99800000	2	57600000	2	42800000	4	89100000	3	35900000	1	665000000	8	560000000	7	634000000	7	516000000	8	835000000	11	633000000	10	499000000	5	1280000000	9	306000000	4	12500000	2	170000000	11
205	QZT34290.1	tRNA uridine-5-carboxymethylaminomethyl(34) synthesis enzyme MnmG [Caldalkalibacillus thermarum TA2.A1]	43300000	7	83000000	7	64200000	6	50400000	6	54300000	4	30800000	4	48400000	7	38200000	5	74600000	6	34200000	7	30000000	5	14400000	4	43700000	6	96100000	11	227000000	13	162000000	12	0	0	101000000	4	26500000	1	16300000	1	1110000000	41
206	QZT34079.1	carbohydrate kinase [Caldalkalibacillus thermarum TA2.A1]	109000000	4	92900000	4	100000000	3	78900000	4	10900000	1	26800000	3	82100000	4	18000000	3	131000000	4	144000000	6	60800000	4	72800000	7	153000000	12	111000000	7	163000000	8	113000000	9	0	0	21000000	2	0	0	7010000	1	409000000	19
207	QZT33732.1	penicillin-binding transpeptidase domain-containing protein [Caldalkalibacillus thermarum TA2.A1]	13800000	5	23200000	4	8810000	3	8930000	4	18300000	4	7810000	4	3980000	2	6150000	3	4060000	2	6000000	3	12400000	3	11000000	4	36800000	9	22900000	7	26900000	5	22100000	4	11400000	1	6220000	1	0	0	0	0	3840000	5
208	QZT35436.1	HAMP domain-containing protein [Caldalkalibacillus thermarum TA2.A1]	192000000	6	117000000	6	71000000	5	64700000	5	184000000	10	108000000	10	85000000	6	75900000	5	76000000	5	63600000	7	60500000	4	102000000	6	240000000	7	61100000	4	394000000	16	317000000	17	12500000	1	145000000	5	41400000	2	0	0	14100000	7
209	QZT34199.1	methylmalonyl Co-A mutase-associated GTPase MeaB [Caldalkalibacillus thermarum TA2.A1]	20400000	5	15600000	3	0	0	0	0	2350000	1	1540000	1	7260000	2	0	0	4860000	2	2460000	1	36300000	1	17800000	1	31500000	3	28200000	2	14400000	5	2200000	1	0	0	0	0	0	0	0	0	813000	1
210	QZT34165.1	F0F1 ATP synthase subunit epsilon [Caldalkalibacillus thermarum TA2.A1]	302000000	4	215000000	4	121000000	1	111000000	2	162000000	3	133000000	2	154000000	4	89400000	3	106000000	2	67900000	3	8150000	1	7540000	2	0	0	4890000	2	65500000	3	12800000	2	0	0	244000000	4	0	0	156000000	4	309000000	10
211	QZT32811.1	phosphate acyltransferase PlsX [Caldalkalibacillus thermarum TA2.A1]	23000000	4	10900000	4	0	0	14600000	3	18900000	5	6270000	3	0	0	5890000	3	168000000	5	107000000	2	218000000	5	136000000	7	211000000	11	175000000	7	191000000	9	162000000	11	2680000	1	131000000	3	5940000	1	32500000	2	32000000	11
212	QZT34643.1	aliphatic sulfonate ABC transporter substrate-binding protein [Caldalkalibacillus thermarum TA2.A1]	146000000	3	29900000	3	15100000	2	14400000	2	104000000	2	85600000	2	79800000	3	68800000	3	53800000	2	46000000	2	46400000	3	34900000	4	98800000	5	85500000	6	89700000	6	79100000	7	41300000	1	74600000	4	0	0	11800000	1	1330000000	15
213	QZT34493.1	phosphoglucosamine mutase [Caldalkalibacillus thermarum TA2.A1]	43200000	4	37400000	3	57400000	4	50000000	4	11200000	1	9240000	1	34600000	4	30900000	4	48900000	4	0	0	42000000	2	46300000	3	40100000	3	27600000	1	97300000	7	63800000	6	0	1	24900000	2	0	0	9990000	1	1220000000	23
214	QZT33841.1	3-hydroxyacyl-CoA dehydrogenase [Caldalkalibacillus thermarum TA2.A1]	33500000	4	5300000	1	71300000	5	42000000	5	19000000	2	26000000	3	11800000	4	13600000	5	59000000	7	43800000	5	65600000	9	91900000	11	107000000	9	53500000	9	169000000	17	118000000	14	10500000	1	37700000	3	0	0	0	0	1090000000	50
215	QZT33314.1	GTP 3' 8-cyclase MoaA [Caldalkalibacillus thermarum TA2.A1]	58800000	5	53000000	3	34700000	3	24200000	2	22400000	2	19300000	3	29800000	3	7260000	3	35900000	5	34500000	3	28900000	3	22800000	4	18600000	4	4320000	1	136000000	7	132000000	8	10600000	2	0	0	0	0	4050000	1	20700000	9
216	QZT34293.1	protein jag [Caldalkalibacillus thermarum TA2.A1]	65300000	2	60600000	3	85100000	4	63900000	4	27600000	3	10100000	2	14900000	1	1210000	1	71600000	3	27400000	2	0	0	0	0	17500000	5	9690000	4	37900000	6	16400000	4	18100000	1	25700000	2	0	0	0	0	2730000	1
217	QZT32538.1	penicillin-binding protein 1A [Caldalkalibacillus thermarum TA2.A1]	31400000	5	25500000	4	84800000	6	65000000	6	9800000	3	7310000	2	11400000	4	18400000	6	591000000	10	418000000	8	2850000	1	1610000	2	4840000	3	2500000	2	1340000000	23	1090000000	19	461000000	11	833000000	8	0	0	0	0	413000000	31
218	QZT33831.1	precorrin-4 C(11)-methyltransferase [Caldalkalibacillus thermarum TA2.A1]	406000000	4	282000000	4	330000000	4	242000000	4	291000000	5	276000000	4	248000000	4	207000000	4	124000000	5	233000000	5	196000000	3	309000000	5	1140000000	8	715000000	9	1300000000	9	913000000	8	649000000	10	325000000	4	164000000	4	313000000	5	561000000	13
219	QZT35462.1	phosphate/phosphite/phosphonate ABC transporter substrate-binding protein [Caldalkalibacillus thermarum TA2.A1]	104000000	5	86600000	3	242000000	4	138000000	3	154000000	3	122000000	3	99100000	5	58600000	3	413000000	6	358000000	7	0	0	0	0	0	0	0	0	792000000	9	838000000	10	600000000	7	739000000	3	307000000	6	61300000	1	89300000	9
220	QZT32753.1	endonuclease III [Caldalkalibacillus thermarum TA2.A1]	25100000	2	0	0	10900000	1	9750000	1	36300000	4	26100000	4	29700000	3	27400000	4	3340000	1	7220000	1	139000000	6	162000000	7	141000000	5	201000000	8	123000000	4	97500000	5	0	0	8440000	1	0	0	37000000	2	5200000	4
221	QZT33688.1	cytoplasmic protein [Caldalkalibacillus thermarum TA2.A1]	116000000	4	125000000	4	99500000	4	49100000	3	4190000	1	16700000	2	110000000	5	54000000	3	101000000	5	26200000	1	21200000	1	18600000	1	54000000	3	398000000	3	162000000	6	98800000	3	0	0	456000000	5	0	0	22200000	2	26500000	8
222	QZT35221.1	hypothetical protein HUR95_00595 [Caldalkalibacillus thermarum TA2.A1]	21300000	2	19100000	2	27300000	2	26500000	2	19900000	3	34500000	3	24200000	3	0	2	32300000	1	24300000	1	0	0	0	0	0	0	0	0	5970000	1	4240000	1	0	0	0	0	0	0	3760000	1	70300000	7
223	QZT35420.1	recombinase RecA [Caldalkalibacillus thermarum TA2.A1]	60600000	3	95400000	4	85800000	3	56700000	3	94700000	6	21100000	5	76700000	4	48000000	3	85700000	3	57000000	2	717000000	9	755000000	10	821000000	13	706000000	11	710000000	11	660000000	12	41100000	2	250000000	5	0	0	204000000	6	1660000000	23
224	QZT35158.1	helicase-exonuclease AddAB subunit AddA [Caldalkalibacillus thermarum TA2.A1]	6410000	6	14800000	6	23200000	6	19200000	5	41100000	7	10800000	5	15600000	7	12300000	6	25500000	7	34800000	10	688000	1	21400000	5	23700000	7	26600000	6	43800000	11	29300000	9	2220000	1	0	0	0	0	2360000	2	204000000	47
225	QZT33685.1	IS200/IS605 family transposase [Caldalkalibacillus thermarum TA2.A1]	245000000	2	636000000	4	605000000	3	629000000	3	280000000	3	190000000	3	485000000	3	389000000	3	492000000	3	423000000	3	77200000	1	108000000	4	88300000	3	65800000	4	224000000	5	177000000	4	0	0	94300000	4	0	0	0	0	97200000	5
226	QZT33654.1	IS200/IS605 family transposase [Caldalkalibacillus thermarum TA2.A1]	245000000	2	636000000	4	605000000	3	629000000	3	280000000	3	190000000	3	485000000	3	389000000	3	492000000	3	423000000	3	77200000	1	108000000	4	88300000	3	65800000	4	224000000	5	177000000	4	0	0	94300000	4	0	0	0	0	97200000	5
227	QZT34416.1	30S ribosomal protein S12 [Caldalkalibacillus thermarum TA2.A1]	793000000	2	434000000	2	348000000	2	176000000	2	384000000	2	190000000	2	185000000	2	135000000	2	266000000	2	212000000	2	95800000	3	96600000	3	246000000	3	248000000	6	487000000	5	450000000	6	0	0	403000000	1	129000000	1	718000000	1	155000000	10
228	QZT34491.1	arginase [Caldalkalibacillus thermarum TA2.A1]	97600000	5	59000000	5	152000000	7	99900000	5	42100000	3	20700000	1	68500000	6	57100000	6	63400000	4	18700000	2	40500000	2	50400000	2	15400000	3	65700000	5	158000000	6	164000000	4	28300000	2	55900000	2	0	0	2690000	1	404000000	14
229	QZT34765.1	MBL fold metallo-hydrolase [Caldalkalibacillus thermarum TA2.A1]	23700000	3	33100000	4	42000000	5	33900000	4	9970000	1	18000000	2	27600000	4	22900000	4	21200000	3	5450000	2	11900000	2	4860000	2	16900000	3	7360000	2	20800000	2	1330000	2	6710000	1	0	0	0	0	0	0	154000000	18
230	QZT33263.1	pyruvate carboxylase [Caldalkalibacillus thermarum TA2.A1]	14500000	5	26400000	7	54300000	7	31300000	6	60400000	6	50000000	5	13200000	5	9180000	5	17400000	3	21200000	3	62900000	7	64200000	7	121000000	9	72500000	10	197000000	19	179000000	16	12300000	1	60600000	5	18400000	1	0	0	2480000000	79
231	QZT33731.1	NAD(P)/FAD-dependent oxidoreductase [Caldalkalibacillus thermarum TA2.A1]	4910000	2	4120000	1	27400000	5	22100000	4	7870000	5	12100000	4	7970000	4	11600000	3	6570000	3	13500000	3	16700000	4	0	1	5350000	4	11900000	6	11800000	3	11800000	3	14800000	2	0	0	0	0	0	0	18200000	8
232	QZT34160.1	NADH-quinone oxidoreductase subunit NuoH [Caldalkalibacillus thermarum TA2.A1]	71800000	4	43500000	3	21100000	2	25800000	3	6930000	1	25000000	3	44700000	3	21100000	2	111000000	4	89900000	3	25600000	1	0	0	41600000	3	12300000	3	131000000	2	44100000	1	93100000	1	0	0	4240000	1	0	0	7460000	4
233	QZT33793.1	electron transfer flavoprotein subunit beta/FixA family protein [Caldalkalibacillus thermarum TA2.A1]	1010000000	2	918000000	2	765000000	2	702000000	2	479000000	3	417000000	2	649000000	3	513000000	2	595000000	3	572000000	2	12300000	2	21600000	3	481000000	4	429000000	4	549000000	4	372000000	5	0	0	177000000	1	2480000	1	36000000	4	0	0
234	QZT35343.1	hypothetical protein HUR95_06915 [Caldalkalibacillus thermarum TA2.A1]	108000000	4	91600000	4	61300000	4	88600000	4	79200000	3	43900000	2	75200000	3	52000000	2	77000000	6	6160000	2	0	0	0	0	0	1	0	0	321000000	7	406000000	8	161000000	9	18200000	1	12900000	1	0	0	122000000	9
235	QZT35004.1	tetraprenyl-beta-curcumene synthase family protein [Caldalkalibacillus thermarum TA2.A1]	23500000	5	14600000	3	11800000	4	8560000	3	0	1	2310000	2	2420000	2	3800000	3	2500000	2	2960000	2	0	0	0	0	14900000	1	17500000	2	0	0	12200000	1	4950000	1	0	0	0	0	0	0	1800000	3
236	QZT33409.1	RNA polymerase sigma factor [Caldalkalibacillus thermarum TA2.A1]	16000000	1	31000000	2	27400000	3	9900000	2	13000000	1	21700000	2	14200000	3	7840000	2	18100000	2	4390000	1	0	0	5070000	1	5620000	1	4080000	1	17600000	3	15700000	2	0	0	0	0	0	0	5080000	1	0	0
237	QZT34521.1	ABC transporter ATP-binding protein [Caldalkalibacillus thermarum TA2.A1]	37300000	3	30000000	2	24900000	2	22700000	3	22100000	4	17600000	4	16700000	2	22300000	4	62600000	2	33900000	1	400000	1	0	0	0	0	912000	1	25200000	3	10500000	2	0	0	0	0	0	0	0	0	33100000	8
238	QZT33191.1	4Fe-4S dicluster domain-containing protein [Caldalkalibacillus thermarum TA2.A1]	588000000	3	518000000	3	357000000	3	326000000	3	209000000	3	188000000	2	269000000	2	231000000	2	726000000	3	635000000	2	104000000	1	99400000	1	394000000	4	450000000	4	1620000000	7	648000000	5	96300000	2	577000000	4	0	0	722000000	5	0	0
239	QZT34654.1	Asp-tRNA(Asn)/Glu-tRNA(Gln) amidotransferase subunit GatB [Caldalkalibacillus thermarum TA2.A1]	37600000	3	24200000	1	36400000	1	36900000	2	41500000	2	41800000	3	29700000	1	29400000	2	33200000	2	17200000	1	124000000	8	111000000	7	176000000	13	147000000	11	216000000	13	155000000	14	0	0	107000000	8	0	0	7000000	1	784000000	40
240	QZT33144.1	thiol-disulfide oxidoreductase ResA [Caldalkalibacillus thermarum TA2.A1]	10800000	3	639000	1	8400000	2	11500000	3	21500000	3	14500000	3	5420000	2	0	1	81000000	3	59500000	4	0	0	0	0	0	1	2270000	1	115000000	3	97900000	5	0	0	68200000	3	0	0	0	0	0	0
241	QZT34440.1	preprotein translocase subunit SecY [Caldalkalibacillus thermarum TA2.A1]	392000000	3	439000000	3	352000000	3	225000000	2	384000000	2	328000000	2	219000000	2	235000000	1	299000000	2	272000000	2	74700000	1	71000000	2	52800000	1	48600000	1	96400000	1	2830000	1	24500000	1	48200000	1	58900000	2	149000000	3	67800000	5
242	QZT32790.1	nicotinate phosphoribosyltransferase [Caldalkalibacillus thermarum TA2.A1]	32900000	4	43200000	5	50800000	6	42200000	6	32800000	4	9770000	3	52700000	6	32300000	5	31900000	5	19800000	4	0	0	4010000	2	4530000	2	6650000	2	42100000	5	41200000	7	19200000	2	0	0	0	0	0	0	113000000	18
243	QZT33836.1	sirohydrochlorin chelatase [Caldalkalibacillus thermarum TA2.A1]	149000000	5	101000000	3	199000000	3	104000000	3	89900000	2	87900000	2	164000000	3	116000000	3	123000000	2	121000000	3	91400000	3	61100000	1	206000000	6	189000000	5	159000000	6	86600000	3	53700000	3	0	0	63200000	1	17700000	2	1490000000	23
244	QZT34302.1	DNA topoisomerase (ATP-hydrolyzing) subunit B [Caldalkalibacillus thermarum TA2.A1]	14300000	3	6650000	2	8250000	2	0	2	2130000	1	1720000	1	4170000	1	0	1	6230000	3	5200000	2	1360000	1	0	0	1130000	1	2910000	2	29700000	5	25900000	3	0	0	0	0	0	0	0	0	36300000	18
245	QZT33840.1	acetyl-CoA C-acetyltransferase [Caldalkalibacillus thermarum TA2.A1]	23900000	2	18500000	3	29500000	4	16800000	3	4740000	2	20000000	3	24000000	3	25800000	4	19800000	4	15100000	3	21700000	2	74400000	3	31600000	4	44500000	5	87300000	7	77600000	8	17800000	1	46700000	5	0	0	4490000	1	503000000	19
246	QZT34287.1	AAA family ATPase [Caldalkalibacillus thermarum TA2.A1]	31900000	2	0	0	21900000	1	0	0	14800000	1	2740000	1	15300000	2	14400000	1	12700000	1	3630000	1	286000000	5	303000000	5	209000000	8	100000000	5	196000000	6	83400000	4	6720000	1	26100000	2	0	1	0	0	39900000	9
247	QZT33758.1	cysteine desulfurase [Caldalkalibacillus thermarum TA2.A1]	35400000	5	32000000	4	59000000	5	43300000	5	45100000	5	44100000	6	34500000	4	32800000	5	31400000	4	50000000	5	0	0	23300000	3	92900000	8	90000000	10	181000000	13	87600000	9	0	0	20300000	1	0	0	28900000	1	3260000000	33
248	QZT34398.1	serine O-acetyltransferase [Caldalkalibacillus thermarum TA2.A1]	258000000	4	165000000	4	82600000	3	135000000	4	300000000	4	237000000	5	276000000	5	257000000	8	236000000	5	71400000	3	1180000000	7	983000000	11	1300000000	10	1060000000	9	1270000000	9	1170000000	10	131000000	1	362000000	3	217000000	2	164000000	2	153000000	11
249	QZT34304.1	magnesium transporter [Caldalkalibacillus thermarum TA2.A1]	56900000	3	51000000	3	48000000	3	39100000	5	51000000	4	43200000	4	32900000	2	24600000	3	29100000	2	23600000	2	0	0	11800000	3	1290000	1	1740000	1	8340000	2	9390000	3	0	0	0	0	0	0	0	0	19600000	8
250	QZT33533.1	uroporphyrinogen-III synthase [Caldalkalibacillus thermarum TA2.A1]	41800000	2	87800000	7	101000000	6	74500000	4	19000000	3	2230000	2	56200000	4	63700000	5	98200000	4	43200000	3	34400000	4	19600000	3	27300000	6	28400000	4	65100000	4	65100000	4	1420000	1	0	0	0	0	0	0	26400000	6
251	QZT33508.1	septum site-determining protein MinD [Caldalkalibacillus thermarum TA2.A1]	58700000	4	29800000	4	25200000	4	18700000	3	61100000	6	52400000	5	15100000	3	23000000	3	36800000	2	38100000	2	375000000	10	349000000	9	504000000	11	508000000	11	700000000	14	584000000	13	75700000	3	89300000	5	36400000	3	101000000	5	133000000	14
252	QZT34792.1	acryloyl-CoA reductase [Caldalkalibacillus thermarum TA2.A1]	30200000	4	35500000	5	32100000	5	24500000	4	22800000	2	17200000	1	42900000	5	42100000	6	33900000	4	14000000	3	4170000	2	11000000	3	41000000	3	39900000	5	42000000	4	45100000	5	23800000	1	14900000	3	57500000	1	20300000	5	279000000	18
253	QZT34163.1	NADH-quinone oxidoreductase subunit B [Caldalkalibacillus thermarum TA2.A1]	239000000	3	367000000	4	802000000	4	457000000	3	571000000	4	163000000	3	267000000	4	142000000	3	636000000	4	159000000	3	101000000	4	118000000	5	271000000	5	133000000	4	429000000	6	388000000	6	5800000	1	360000000	3	36600000	1	155000000	4	56200000	7
254	QZT35059.1	catabolite control protein A [Caldalkalibacillus thermarum TA2.A1]	52800000	2	58000000	3	25100000	2	34400000	3	15900000	1	22200000	2	22400000	2	20000000	1	0	0	5070000	1	149000000	4	163000000	10	170000000	9	154000000	9	212000000	8	187000000	9	2110000	1	129000000	3	0	0	0	0	102000000	16
255	QZT33182.1	deoxyribonuclease IV [Caldalkalibacillus thermarum TA2.A1]	19100000	3	18300000	3	10600000	2	16500000	3	26900000	3	24700000	3	25200000	3	19900000	3	11700000	4	9680000	3	5450000	2	707000	1	44000000	3	28100000	3	29600000	3	25600000	3	9820000	1	0	0	0	0	0	0	147000000	10
256	QZT35457.1	bifunctional hydroxymethylpyrimidine kinase/phosphomethylpyrimidine kinase [Caldalkalibacillus thermarum TA2.A1]	230000000	4	149000000	4	488000000	6	394000000	5	85600000	2	85100000	4	274000000	6	260000000	4	653000000	7	546000000	4	467000000	7	405000000	7	674000000	9	595000000	9	734000000	11	584000000	8	34400000	1	70800000	3	18500000	1	52500000	2	1350000000	14
257	QZT34446.1	30S ribosomal protein S13 [Caldalkalibacillus thermarum TA2.A1]	73800000	3	51700000	5	86900000	3	58400000	3	10500000	1	6490000	1	23700000	2	19200000	3	76700000	4	51700000	3	121000000	2	209000000	5	186000000	5	159000000	4	136000000	3	144000000	3	0	0	356000000	2	0	0	22200000	1	172000000	10
258	QZT35459.1	thiazole synthase [Caldalkalibacillus thermarum TA2.A1]	35600000	3	45800000	4	52800000	4	28400000	3	21300000	2	24200000	3	35700000	3	37200000	4	17200000	3	14600000	3	60500000	2	64200000	3	127000000	6	103000000	6	182000000	8	137000000	7	48600000	3	33800000	2	43400000	2	42400000	3	639000000	12
259	QZT33429.1	homoserine dehydrogenase [Caldalkalibacillus thermarum TA2.A1]	5310000	3	1820000	1	1370000	1	7340000	4	1860000	2	1130000	1	4170000	2	957000	1	4340000	2	0	0	0	0	0	0	600000	1	0	0	1320000	1	1040000	1	0	0	0	0	0	0	0	0	0	0
260	QZT32624.1	1-acyl-sn-glycerol-3-phosphate acyltransferase [Caldalkalibacillus thermarum TA2.A1]	50500000	5	43900000	4	57400000	4	30000000	4	20100000	5	14200000	3	17500000	3	25000000	4	74600000	5	58900000	3	13400000	1	6350000	1	8320000	1	21300000	2	61800000	4	50000000	3	0	0	25400000	1	0	1	0	0	5860000	4
261	QZT34435.1	50S ribosomal protein L6 [Caldalkalibacillus thermarum TA2.A1]	274000000	4	225000000	5	137000000	3	127000000	4	307000000	6	229000000	4	159000000	4	132000000	5	93200000	3	85400000	3	1040000000	7	1010000000	7	1170000000	8	1030000000	8	1400000000	6	1190000000	5	105000000	1	3090000000	9	0	0	241000000	3	696000000	10
262	QZT33436.1	type I glutamate--ammonia ligase [Caldalkalibacillus thermarum TA2.A1]	7460000	2	14300000	4	11900000	3	10400000	3	7120000	2	6240000	3	14800000	5	8040000	3	10300000	3	6580000	2	13800000	1	25200000	3	19200000	4	20000000	7	30800000	4	31300000	6	0	0	0	0	0	0	0	0	195000000	19
263	QZT35271.1	MgtC/SapB family protein [Caldalkalibacillus thermarum TA2.A1]	32900000	1	25700000	1	47800000	1	36100000	1	0	0	0	0	21600000	1	15500000	1	33500000	1	69800000	1	0	0	11600000	1	41400000	2	39400000	2	15000000	2	42300000	3	0	0	0	0	10600000	1	0	0	26200000	5
264	QZT34651.1	CamS family sex pheromone protein [Caldalkalibacillus thermarum TA2.A1]	56100000	2	80600000	3	109000000	3	123000000	4	89100000	3	77600000	3	97800000	3	47400000	4	66100000	4	38500000	2	0	0	5180000	1	0	1	0	0	108000000	6	72700000	7	38800000	2	12300000	1	0	0	0	0	13600000	7
265	QZT32728.1	YpiF family protein [Caldalkalibacillus thermarum TA2.A1]	63000000	3	29500000	3	39300000	3	13000000	2	12200000	3	8930000	2	13900000	2	17400000	3	6240000	1	16700000	2	12300000	1	9300000	1	12400000	2	46500000	2	54100000	5	46900000	3	0	0	0	0	0	0	0	0	216000000	6
266	QZT34419.1	30S ribosomal protein S10 [Caldalkalibacillus thermarum TA2.A1]	128000000	1	111000000	1	60400000	2	54900000	1	103000000	1	24300000	2	63300000	1	51200000	1	92000000	2	106000000	2	523000000	4	427000000	4	364000000	3	395000000	4	448000000	5	308000000	4	0	0	528000000	2	158000000	1	0	0	356000000	7
267	QZT35185.1	CRISPR-associated endoribonuclease Cas6 [Caldalkalibacillus thermarum TA2.A1]	94900000	4	32800000	1	82400000	6	74800000	6	53400000	2	42700000	2	48500000	3	46100000	3	30900000	3	29100000	1	52200000	2	46500000	2	77400000	2	33200000	1	104000000	6	45800000	2	60300000	4	0	0	4040000	1	0	0	12300000	6
268	QZT33385.1	formate dehydrogenase accessory sulfurtransferase FdhD [Caldalkalibacillus thermarum TA2.A1]	186000000	3	130000000	2	130000000	2	82700000	2	81700000	4	66200000	3	108000000	3	85900000	2	113000000	2	132000000	3	117000000	3	90800000	2	257000000	6	202000000	4	462000000	10	309000000	10	0	0	0	0	28600000	2	18300000	2	4930000	3
269	QZT34965.1	ABC transporter ATP-binding protein [Caldalkalibacillus thermarum TA2.A1]	34300000	4	35000000	4	18300000	3	23600000	4	33700000	7	23400000	4	37800000	3	19400000	3	20000000	4	16100000	4	4020000	1	4350000	2	58100000	6	61800000	5	123000000	9	65500000	5	0	0	16400000	2	12400000	1	16800000	2	22700000	7
270	QZT33511.1	rod shape-determining protein MreC [Caldalkalibacillus thermarum TA2.A1]	17500000	4	9820000	3	13300000	3	9820000	4	1550000	1	0	0	7070000	3	4300000	2	4070000	2	0	0	0	1	7700000	1	0	0	0	0	35500000	2	55800000	3	0	0	0	0	0	0	6460000	1	8670000	9
271	QZT32724.1	3-phosphoshikimate 1-carboxyvinyltransferase [Caldalkalibacillus thermarum TA2.A1]	57700000	3	19800000	4	35100000	5	18200000	3	4270000	3	10800000	4	5220000	1	1510000	1	62500000	4	45700000	4	87600000	4	74000000	5	98700000	4	142000000	6	195000000	12	167000000	11	0	0	10600000	1	0	0	0	0	143000000	23
272	QZT33628.1	transketolase [Caldalkalibacillus thermarum TA2.A1]	24500000	5	17400000	3	47000000	4	19200000	3	28800000	4	26800000	5	37300000	8	23400000	7	22000000	3	19500000	4	13200000	3	48500000	4	31700000	6	50300000	7	93800000	6	62100000	7	31300000	4	29000000	3	0	0	10700000	2	984000000	37
273	QZT32855.1	1 4-dihydroxy-2-naphthoyl-CoA synthase [Caldalkalibacillus thermarum TA2.A1]	18700000	2	11400000	2	6410000	1	19400000	1	1020000	1	0	0	13800000	2	10200000	2	7910000	1	10400000	2	0	0	156000	1	9940000	5	7390000	5	17700000	4	9490000	3	0	0	5610000	2	0	0	0	0	523000000	13
274	QZT33517.1	pilus assembly protein PilM [Caldalkalibacillus thermarum TA2.A1]	46700000	3	16800000	1	42800000	2	4650000	2	8300000	3	0	1	21700000	3	2300000	1	48400000	4	9700000	4	5390000	1	5240000	1	7140000	3	6260000	1	18900000	3	5770000	3	0	0	0	0	0	0	6070000	1	402000	3
275	QZT34050.1	phosphocholine cytidylyltransferase family protein [Caldalkalibacillus thermarum TA2.A1]	43500000	4	74800000	5	71700000	4	62300000	5	71800000	4	48100000	4	23300000	3	20500000	2	75300000	4	37900000	2	147000000	7	102000000	4	114000000	9	66500000	7	172000000	11	127000000	9	0	0	0	0	0	0	79200000	1	176000000	14
276	QZT34619.1	bifunctional phosphoribosylaminoimidazolecarboxamide formyltransferase/IMP cyclohydrolase [Caldalkalibacillus thermarum TA2.A1]	14600000	4	19500000	4	35900000	5	27700000	5	2150000	1	0	0	24800000	4	21200000	5	15400000	2	28700000	4	0	0	13100000	5	58200000	7	65900000	12	56900000	8	80100000	6	0	0	136000000	8	6840000	1	0	0	649000000	35
277	QZT32534.1	PepSY domain-containing protein [Caldalkalibacillus thermarum TA2.A1]	278000000	2	243000000	2	275000000	2	239000000	3	153000000	2	226000000	2	224000000	2	192000000	2	156000000	2	121000000	1	0	0	0	0	8850000	1	77000000	2	123000000	3	104000000	2	0	0	0	0	0	0	0	0	15200000	2
278	QZT33142.1	cytochrome c biogenesis protein CcsA [Caldalkalibacillus thermarum TA2.A1]	1640000000	2	1290000000	2	1030000000	2	951000000	2	1110000000	2	1110000000	2	750000000	1	716000000	2	871000000	1	893000000	1	21400000	1	13400000	1	22700000	1	20000000	1	34100000	1	25700000	1	0	0	0	0	16700000	1	57500000	1	72100000	3
279	QZT34845.1	D-2-hydroxyacid dehydrogenase [Caldalkalibacillus thermarum TA2.A1]	6990000	3	11900000	2	14300000	3	23200000	3	9100000	1	5480000	1	30500000	3	14400000	1	10300000	1	25200000	2	2660000	1	2590000	2	12000000	5	4820000	1	27600000	3	2590000	2	0	0	0	0	0	0	0	0	546000000	21
280	QZT35256.1	thioredoxin-dependent thiol peroxidase [Caldalkalibacillus thermarum TA2.A1]	10500000	2	2080000	1	6660000	1	14800000	2	10800000	1	11100000	1	12300000	2	12500000	2	15000000	2	10900000	2	6060000	2	5780000	2	10300000	2	7950000	1	44400000	4	30000000	4	8310000	1	7110000	1	0	0	6600000	1	350000000	14
281	QZT34048.1	glycosyltransferase family 2 protein [Caldalkalibacillus thermarum TA2.A1]	17300000	3	17900000	3	17100000	2	20600000	3	0	0	0	0	8950000	2	7770000	2	16200000	2	15900000	3	0	0	0	0	0	0	0	0	20200000	5	7030000	2	0	0	0	0	0	0	0	0	2450000	3
282	QZT33636.1	NAD(P)/FAD-dependent oxidoreductase [Caldalkalibacillus thermarum TA2.A1]	29300000	2	16800000	3	37800000	4	34800000	4	26700000	2	14300000	1	16100000	2	12100000	3	16500000	2	10900000	2	22100000	2	30600000	3	59100000	6	43500000	5	282000000	10	130000000	6	23000000	3	151000000	6	3090000	1	20500000	4	2310000000	21
283	QZT35002.1	phosphoenolpyruvate carboxykinase (ATP) [Caldalkalibacillus thermarum TA2.A1]	23200000	2	75500000	4	91300000	5	107000000	5	150000000	8	130000000	6	117000000	5	68700000	4	102000000	5	90200000	6	240000000	6	227000000	9	216000000	11	242000000	12	366000000	15	288000000	15	116000000	3	23900000	2	54100000	2	3110000	1	19900000	10
284	QZT33601.1	thioredoxin [Caldalkalibacillus thermarum TA2.A1]	26100000	2	24200000	2	60000000	3	49700000	3	20700000	3	3570000	3	25300000	2	21800000	2	15200000	1	0	0	101000000	3	52500000	4	72900000	3	57500000	5	102000000	5	23400000	2	0	0	227000000	2	0	0	22700000	2	6600000000	12
285	QZT34315.1	serine--tRNA ligase [Caldalkalibacillus thermarum TA2.A1]	34900000	4	16600000	3	48400000	3	23900000	3	63400000	5	23300000	2	48900000	4	24500000	3	22300000	3	15500000	3	9340000	4	13400000	4	66600000	6	60900000	8	32600000	5	33500000	3	23100000	1	0	0	0	0	0	1	576000000	27
286	QZT35328.1	C40 family peptidase [Caldalkalibacillus thermarum TA2.A1]	8830000	3	6220000	2	7010000	2	2720000	2	8220000	2	5490000	1	3980000	2	3770000	2	10900000	3	6720000	1	10500000	1	11200000	1	12400000	2	9390000	2	25300000	4	14900000	2	0	0	0	0	0	0	0	0	55500000	12
287	QZT35389.1	aminomethyl-transferring glycine dehydrogenase subunit GcvPA [Caldalkalibacillus thermarum TA2.A1]	34400000	4	35700000	8	54000000	7	49500000	8	18700000	7	29500000	8	53300000	8	32900000	7	21500000	6	33100000	3	0	0	29600000	3	45100000	8	31900000	7	109000000	10	64600000	11	48900000	5	10100000	1	0	0	0	0	235000000	21
288	QZT33094.1	isoleucine--tRNA ligase [Caldalkalibacillus thermarum TA2.A1]	15400000	4	18800000	4	41600000	5	16000000	5	52600000	5	58600000	6	55900000	7	41000000	5	19400000	3	16200000	3	19700000	1	63400000	8	104000000	11	112000000	11	107000000	8	62800000	7	0	0	0	0	0	0	0	1	657000000	55
289	QZT34449.1	50S ribosomal protein L17 [Caldalkalibacillus thermarum TA2.A1]	151000000	2	110000000	2	76100000	3	39500000	1	63400000	1	56900000	1	69400000	2	53600000	2	47800000	2	47600000	2	7870000	1	6350000	1	158000000	4	120000000	3	126000000	3	139000000	3	0	0	473000000	2	141000000	1	143000000	2	62500000	4
290	QZT34448.1	DNA-directed RNA polymerase subunit alpha [Caldalkalibacillus thermarum TA2.A1]	30200000	3	37700000	3	26800000	3	30600000	4	18400000	1	16200000	1	19400000	2	10300000	1	45000000	4	19700000	1	57800000	3	46900000	2	77900000	4	82900000	5	137000000	7	171000000	7	13500000	1	36800000	1	0	0	0	0	826000000	27
291	QZT33885.1	phosphoglycerate kinase [Caldalkalibacillus thermarum TA2.A1]	76300000	4	53500000	4	68400000	3	57100000	3	163000000	4	116000000	3	97800000	4	109000000	4	79900000	4	53600000	4	44300000	5	41400000	5	375000000	10	322000000	8	393000000	9	309000000	9	23300000	4	214000000	8	0	0	26800000	1	2440000000	24
292	QZT34051.1	iron-containing alcohol dehydrogenase family protein [Caldalkalibacillus thermarum TA2.A1]	9900000	3	23200000	3	49000000	3	39700000	5	27200000	4	2820000	2	32600000	5	18500000	4	33300000	4	25100000	3	13600000	1	1800000	1	14000000	3	21400000	5	68500000	7	45600000	6	0	0	0	0	0	0	2780000	1	12100000	9
293	QZT34298.1	chromosomal replication initiator protein DnaA [Caldalkalibacillus thermarum TA2.A1]	15500000	4	16500000	3	24300000	4	15800000	3	15200000	3	5930000	1	17500000	2	15900000	4	22300000	3	7280000	2	29400000	4	17300000	1	31200000	5	18700000	6	14200000	1	3060000	2	0	0	905000	1	0	0	1750000	1	11100000	9
294	QZT33915.1	SCO family protein [Caldalkalibacillus thermarum TA2.A1]	583000000	5	643000000	6	377000000	3	322000000	4	1010000000	6	861000000	6	455000000	2	397000000	4	278000000	4	235000000	3	617000000	4	546000000	5	4110000000	6	3830000000	6	5120000000	7	4150000000	6	4250000000	11	985000000	2	3150000000	9	579000000	1	290000000	9
295	QZT33080.1	alkyl hydroperoxide reductase subunit F [Caldalkalibacillus thermarum TA2.A1]	7560000	3	5620000	2	21300000	2	13000000	2	14600000	5	12600000	5	12100000	1	18600000	5	23900000	5	7800000	3	973000	2	3280000	4	6740000	2	24200000	4	53500000	8	63900000	8	0	0	13600000	2	0	0	18300000	3	1250000000	38
296	QZT32696.1	aminomethyl-transferring glycine dehydrogenase subunit GcvPB [Caldalkalibacillus thermarum TA2.A1]	21500000	4	9020000	2	14100000	2	15300000	3	45800000	7	45400000	5	13700000	3	7550000	2	22400000	4	34600000	6	69800000	2	112000000	5	116000000	6	107000000	5	146000000	12	186000000	10	0	0	47600000	4	0	0	1510000	1	235000000	24
297	QZT33848.1	ferrochelatase [Caldalkalibacillus thermarum TA2.A1]	15300000	2	8420000	3	33500000	4	44000000	5	8770000	2	4780000	2	20600000	3	17800000	4	3720000	1	2990000	2	2990000	1	17700000	3	19700000	3	6390000	4	48200000	4	30500000	4	0	0	2680000	1	0	1	0	0	256000000	21
298	QZT34949.1	response regulator transcription factor [Caldalkalibacillus thermarum TA2.A1]	29300000	2	12300000	2	5290000	2	4650000	2	11800000	2	7270000	1	9560000	3	3170000	1	2450000	1	3020000	3	16900000	2	21600000	2	0	0	24300000	4	7290000	2	11300000	4	0	0	0	0	0	0	902000	1	6480000	4
299	QZT33769.1	biotin-dependent carboxyltransferase family protein [Caldalkalibacillus thermarum TA2.A1]	9560000	2	3220000	2	0	1	7150000	2	0	0	0	0	4360000	1	0	0	0	0	555000	1	0	0	0	0	0	0	0	0	6160000	1	742000	1	0	0	0	0	0	0	0	0	0	0
300	QZT33261.1	ABC transporter ATP-binding protein [Caldalkalibacillus thermarum TA2.A1]	6980000	3	8620000	3	6020000	4	5330000	3	5960000	1	2990000	1	4730000	2	2640000	2	0	0	0	0	0	0	0	0	264000	1	374000	1	1070000	1	606000	1	0	0	0	0	5340000	1	0	0	338000	3
301	QZT33818.1	adenosylmethionine--8-amino-7-oxononanoate transaminase [Caldalkalibacillus thermarum TA2.A1]	41300000	3	33500000	3	54700000	3	47900000	5	7420000	1	3620000	3	38000000	4	35900000	6	133000000	4	120000000	6	17900000	2	18400000	3	78700000	3	83000000	4	244000000	7	201000000	7	19600000	1	0	0	0	0	0	0	1620000000	32
302	QZT34204.1	DEAD/DEAH box helicase [Caldalkalibacillus thermarum TA2.A1]	4670000	3	0	1	7380000	2	9110000	3	6960000	2	5040000	1	0	0	432000	2	0	0	2180000	2	750000	1	300000	1	25600000	4	20200000	5	21800000	6	39900000	7	0	0	0	0	0	0	0	0	41600000	19
303	QZT34254.1	cell wall metabolism sensor histidine kinase WalK [Caldalkalibacillus thermarum TA2.A1]	4160000	4	2710000	1	4120000	2	3480000	5	1340000	1	1920000	1	1830000	1	2350000	2	2800000	2	0	0	0	0	0	0	0	0	0	0	0	0	0	0	0	0	0	0	0	1	2070000	1	395000	1
304	QZT34825.1	ATP-binding cassette domain-containing protein [Caldalkalibacillus thermarum TA2.A1]	9340000	3	18500000	4	31400000	3	34100000	6	16700000	5	12800000	3	8270000	3	11200000	4	9490000	3	6880000	3	4340000	2	2810000	2	71100000	4	73800000	6	66300000	6	22500000	2	12200000	1	10100000	1	0	0	0	0	2480000	3
305	QZT34450.1	energy-coupling factor transporter ATPase [Caldalkalibacillus thermarum TA2.A1]	11300000	3	6240000	2	14500000	2	14800000	3	7010000	2	10400000	3	5640000	2	4330000	2	0	0	20900000	1	2730000	1	2370000	1	2270000	1	0	0	14400000	4	10600000	4	0	0	2390000	1	0	0	0	0	1130000	3
306	QZT34222.1	N-acetylglucosamine-specific PTS transporter subunit IIBC [Caldalkalibacillus thermarum TA2.A1]	76500000	2	62800000	1	53200000	1	35800000	1	16800000	2	0	0	5150000	1	26400000	1	2570000	1	6910000	1	68500000	3	55000000	3	6510000	1	18200000	2	0	0	21200000	1	0	0	18000000	1	0	0	29100000	2	19800000	3
307	QZT32827.1	signal peptidase I [Caldalkalibacillus thermarum TA2.A1]	10100000	2	3790000	1	10100000	2	5200000	1	8620000	1	8470000	1	12800000	3	8070000	2	7180000	2	0	0	2090000	1	0	0	1350000	1	1660000	1	17200000	1	16100000	1	0	0	0	0	0	0	0	0	2600000	3
308	QZT33914.1	hypothetical protein HUR95_00235 [Caldalkalibacillus thermarum TA2.A1]	200000000	2	173000000	1	141000000	2	120000000	2	211000000	3	167000000	3	131000000	1	117000000	2	93800000	2	69700000	3	44800000	2	8250000	1	24200000	1	8960000	1	103000000	2	26600000	1	52800000	2	0	0	0	0	0	0	2740000	2
309	QZT35053.1	MBL fold metallo-hydrolase [Caldalkalibacillus thermarum TA2.A1]	25700000	4	23200000	4	14300000	3	12400000	3	0	0	5510000	1	19300000	4	8760000	3	21700000	1	18600000	3	0	0	0	0	6850000	1	6260000	2	17800000	2	8150000	2	2550000	1	0	0	0	0	0	0	13000000	2
310	QZT35016.1	MBL fold metallo-hydrolase [Caldalkalibacillus thermarum TA2.A1]	25700000	4	23200000	4	14300000	3	12400000	3	0	0	5510000	1	19300000	4	8760000	3	21700000	1	18600000	3	0	0	0	0	6850000	1	6260000	2	17800000	2	8150000	2	2550000	1	0	0	0	0	0	0	282000	1
311	QZT33741.1	lipoyl synthase [Caldalkalibacillus thermarum TA2.A1]	12200000	2	6150000	2	5590000	1	14100000	3	15200000	3	0	0	12000000	3	0	1	13700000	3	389000	1	230000000	6	288000000	6	292000000	11	331000000	10	309000000	11	111000000	7	0	0	218000000	5	1800000	1	30300000	3	93000000	16
312	QZT34635.1	DUF3048 domain-containing protein [Caldalkalibacillus thermarum TA2.A1]	11200000	4	16200000	4	6910000	4	7110000	3	2810000	1	16400000	4	7520000	2	5160000	2	15400000	2	12700000	3	45600000	3	68200000	3	28500000	4	7610000	2	20800000	5	44100000	5	11900000	1	0	0	0	0	0	0	3870000	4
313	QZT33033.1	ADP-forming succinate--CoA ligase subunit beta [Caldalkalibacillus thermarum TA2.A1]	35500000	3	32400000	3	23000000	2	20500000	3	18000000	2	22000000	2	30900000	2	30900000	4	6240000	2	28400000	2	159000000	6	178000000	8	90800000	7	142000000	6	220000000	9	226000000	8	29400000	2	272000000	10	86700000	4	40400000	4	1200000000	24
314	QZT34317.1	dipeptide ABC transporter ATP-binding protein [Caldalkalibacillus thermarum TA2.A1]	14800000	3	16500000	3	5690000	1	5720000	2	19300000	3	18700000	3	7460000	3	5750000	1	1140000	1	0	0	9080000	1	5750000	1	14400000	3	8970000	3	8010000	2	4880000	1	0	0	0	0	0	0	0	0	0	0
315	QZT32722.1	histidinol-phosphate transaminase [Caldalkalibacillus thermarum TA2.A1]	5040000	2	5260000	2	4370000	1	3610000	2	2930000	2	2120000	1	3910000	2	2070000	1	3580000	2	715000	1	17800000	2	15800000	2	24100000	5	25700000	4	11600000	2	11100000	3	0	0	3270000	1	0	0	1750000	1	273000000	16
316	QZT33422.1	Na+/H+ antiporter subunit A [Caldalkalibacillus thermarum TA2.A1]	12400000	2	3060000	1	7000000	1	6290000	1	18900000	3	3920000	2	1800000	1	0	0	0	0	0	0	0	0	0	0	0	0	0	0	0	0	0	0	0	0	0	0	0	0	0	0	380000	1
317	QZT34982.1	extracellular solute-binding protein [Caldalkalibacillus thermarum TA2.A1]	15300000	3	0	0	11500000	3	8760000	2	2350000	1	0	0	4840000	1	2360000	1	14300000	2	0	0	0	0	0	0	95500000	6	75200000	5	200000000	7	188000000	7	0	0	47200000	3	0	0	36600000	2	2780000	7
318	QZT32750.1	pyridoxal phosphate-dependent aminotransferase [Caldalkalibacillus thermarum TA2.A1]	25200000	4	19200000	3	63800000	4	75500000	4	97900000	6	51500000	4	48800000	4	2760000	1	49100000	4	42800000	4	51000000	3	47400000	5	87700000	7	102000000	7	107000000	8	69500000	9	0	0	32000000	5	0	0	5460000	2	601000000	20
319	QZT34663.1	IS1634 family transposase [Caldalkalibacillus thermarum TA2.A1]	19300000	2	17200000	3	15700000	2	11900000	3	11300000	3	10800000	3	12000000	3	9300000	2	34000000	5	15400000	2	8170000	1	1110000	1	6180000	2	14500000	2	4570000	1	4040000	1	0	0	5090000	1	0	0	0	0	1020000	2
320	QZT35207.1	IS1634 family transposase [Caldalkalibacillus thermarum TA2.A1]	19300000	2	17200000	3	15700000	2	11900000	3	11300000	3	10800000	3	12000000	3	9300000	2	34000000	5	15400000	2	8170000	1	1110000	1	6180000	2	14500000	2	4570000	1	4040000	1	0	0	0	0	0	0	0	0	1020000	2
321	QZT32751.1	asparagine--tRNA ligase [Caldalkalibacillus thermarum TA2.A1]	65200000	3	58700000	5	41400000	4	34700000	4	44600000	3	39800000	3	19700000	2	11600000	1	33500000	5	7280000	1	3730000	1	13100000	2	0	0	8800000	1	63600000	5	49400000	4	0	0	0	0	0	0	7030000	1	196000000	23
322	QZT35456.1	ABC transporter ATP-binding protein [Caldalkalibacillus thermarum TA2.A1]	11000000	2	10100000	2	11800000	3	8380000	2	2660000	2	489000	1	10000000	3	5250000	2	18200000	2	9490000	3	9760000	2	20800000	4	36300000	5	19800000	4	41000000	7	30200000	6	6790000	1	0	0	0	0	8780000	2	0	0
323	QZT32735.1	4-hydroxy-tetrahydrodipicolinate reductase [Caldalkalibacillus thermarum TA2.A1]	50900000	2	16700000	2	24000000	2	27500000	2	0	0	13900000	2	17100000	2	10500000	1	28700000	3	29200000	1	15300000	3	12500000	2	43600000	2	3350000	1	41200000	3	4710000	3	0	0	0	0	0	0	0	0	79400000	11
324	QZT32995.1	translation elongation factor Ts [Caldalkalibacillus thermarum TA2.A1]	24500000	2	13800000	2	28700000	2	19000000	2	22400000	4	20800000	4	28500000	3	0	0	11400000	1	8100000	2	232000000	10	184000000	9	74800000	6	141000000	7	113000000	6	89700000	7	24000000	3	186000000	9	0	0	39500000	2	1010000000	24
325	QZT33538.1	endopeptidase La [Caldalkalibacillus thermarum TA2.A1]	27100000	3	21400000	3	76200000	4	39600000	1	16100000	2	14200000	3	85600000	5	40100000	4	89800000	2	61900000	4	184000000	16	188000000	12	152000000	10	137000000	9	242000000	15	220000000	17	23100000	3	39700000	6	0	0	16300000	2	243000000	27
326	QZT34396.1	2-C-methyl-D-erythritol 4-phosphate cytidylyltransferase [Caldalkalibacillus thermarum TA2.A1]	28700000	4	22000000	2	21600000	3	16100000	4	2060000	1	1470000	1	13900000	1	14700000	2	3220000	1	3860000	1	3480000	2	0	0	16500000	4	4070000	3	41300000	5	38100000	5	0	0	0	0	0	0	0	0	52000000	11
327	QZT34262.1	DHH family phosphoesterase [Caldalkalibacillus thermarum TA2.A1]	61900000	5	59700000	5	32300000	3	32600000	4	32700000	3	15000000	4	3240000	3	11700000	5	15900000	6	25300000	2	44700000	3	56300000	6	24500000	4	2990000	1	21500000	5	20800000	10	4740000	1	5790000	2	0	0	38900000	3	2430000	4
328	QZT32996.1	30S ribosomal protein S2 [Caldalkalibacillus thermarum TA2.A1]	31700000	5	77600000	7	63500000	5	46900000	5	74200000	6	60500000	5	20100000	2	26700000	3	182000000	2	157000000	3	189000000	3	164000000	3	362000000	7	364000000	9	528000000	9	396000000	8	0	0	1220000000	9	39400000	1	271000000	7	457000000	15
329	QZT34258.1	NTP transferase domain-containing protein [Caldalkalibacillus thermarum TA2.A1]	92400000	2	78100000	2	106000000	2	101000000	2	9880000	1	42900000	2	63300000	1	72600000	2	107000000	1	72100000	2	189000000	5	138000000	4	96400000	4	101000000	2	126000000	4	38000000	3	0	0	147000000	2	56200000	1	49400000	2	50200000	9
330	QZT34740.1	type I-B CRISPR-associated protein Cas8b1/Cst1 [Caldalkalibacillus thermarum TA2.A1]	7170000	3	14200000	4	17600000	4	20600000	5	12900000	5	24000000	7	22600000	5	10200000	3	9120000	3	15400000	3	0	0	1080000	1	21800000	3	14800000	3	43500000	5	31800000	4	21800000	1	7260000	2	0	0	18800000	3	291000000	31
331	QZT35523.1	cobalamin biosynthesis protein [Caldalkalibacillus thermarum TA2.A1]	78700000	3	50500000	3	111000000	3	95100000	3	48800000	6	34200000	6	91500000	5	64800000	5	110000000	6	36200000	3	151000000	9	157000000	7	374000000	16	318000000	12	586000000	18	393000000	12	3630000	1	58300000	3	6390000	1	38400000	4	672000000	23
332	QZT33470.1	AAA family ATPase [Caldalkalibacillus thermarum TA2.A1]	76900000	4	54300000	3	61200000	5	47900000	5	30100000	4	32500000	5	45800000	5	38600000	4	55000000	5	45200000	4	21600000	3	13400000	3	77800000	8	52300000	7	60100000	9	29500000	7	0	0	5640000	1	0	0	33600000	2	379000000	21
333	QZT34868.1	guanylate kinase [Caldalkalibacillus thermarum TA2.A1]	2180000	3	8590000	2	6090000	2	10200000	2	12300000	2	1600000	1	3390000	3	20700000	3	28900000	3	32100000	4	41000000	2	5280000	1	75300000	7	52200000	4	60300000	4	72100000	5	0	0	20900000	1	0	0	14200000	1	939000000	19
334	QZT35069.1	septation ring formation regulator EzrA [Caldalkalibacillus thermarum TA2.A1]	28900000	4	35200000	2	2280000	2	16000000	2	27600000	3	36400000	3	2870000	1	9950000	2	10200000	2	1340000	1	179000000	10	136000000	10	159000000	9	134000000	10	81900000	7	80300000	8	31400000	1	58300000	5	0	0	29200000	1	41300000	19
335	QZT35287.1	CopG family ribbon-helix-helix protein [Caldalkalibacillus thermarum TA2.A1]	9710000	2	9530000	1	1720000	1	0	0	0	0	0	0	2090000	1	4480000	1	58600000	1	3610000	1	0	0	0	0	0	0	0	0	0	0	0	0	0	0	0	0	0	0	0	0	14700000	2
336	QZT33761.1	U32 family peptidase [Caldalkalibacillus thermarum TA2.A1]	12400000	3	13000000	4	13400000	2	4120000	2	12600000	3	9530000	4	10900000	2	8570000	4	15800000	5	8050000	3	25500000	4	54700000	2	39900000	6	42300000	4	53400000	6	54100000	8	1800000	1	0	0	0	0	0	0	19900000	11
337	QZT32613.1	SDR family oxidoreductase [Caldalkalibacillus thermarum TA2.A1]	276000000	4	209000000	4	498000000	4	404000000	4	89200000	5	70000000	4	261000000	3	143000000	2	408000000	3	432000000	2	53400000	4	49800000	3	175000000	6	177000000	3	449000000	6	317000000	4	34100000	3	14700000	1	0	0	43900000	1	40800000	5
338	QZT35344.1	ABC transporter permease [Caldalkalibacillus thermarum TA2.A1]	41800000	3	39400000	2	66400000	2	45500000	2	17400000	2	11300000	2	28200000	3	19100000	2	33400000	1	85600000	2	0	0	0	0	888000	1	0	0	0	2	19500000	2	0	0	0	0	0	0	0	0	7120000	4
339	QZT33612.1	substrate-binding domain-containing protein [Caldalkalibacillus thermarum TA2.A1]	154000000	3	124000000	5	34500000	3	14100000	3	3600000	2	3400000	2	53400000	5	9730000	5	175000000	5	169000000	4	0	0	0	0	742000000	6	684000000	7	2710000000	7	2050000000	7	3820000000	6	4480000000	7	397000000	5	178000000	3	244000000	8
340	QZT34311.1	D-alanyl-D-alanine carboxypeptidase [Caldalkalibacillus thermarum TA2.A1]	218000000	4	451000000	4	484000000	5	409000000	3	28600000	4	60100000	2	312000000	3	250000000	4	379000000	4	288000000	4	6340000	3	6170000	3	571000000	11	489000000	12	1030000000	12	870000000	14	354000000	6	311000000	5	116000000	3	270000000	6	188000000	15
341	QZT34976.1	threonine--tRNA ligase [Caldalkalibacillus thermarum TA2.A1]	11800000	2	12600000	3	11600000	2	11700000	2	0	0	12000000	1	7890000	2	6380000	1	17100000	2	19200000	3	15300000	2	38700000	5	6420000	1	13000000	2	46900000	6	41200000	7	0	0	0	0	0	0	0	0	226000000	33
342	QZT34947.1	NADP-dependent isocitrate dehydrogenase [Caldalkalibacillus thermarum TA2.A1]	38500000	3	34600000	4	63100000	6	41100000	5	56600000	5	49100000	5	43400000	5	42800000	6	55600000	6	34700000	3	84400000	5	79500000	4	60300000	3	104000000	5	135000000	7	88300000	4	0	0	10100000	1	0	0	5710000	2	621000000	28
343	QZT32699.1	vitamin B12-dependent ribonucleotide reductase [Caldalkalibacillus thermarum TA2.A1]	14800000	4	13900000	3	27800000	5	24700000	6	51300000	7	41400000	7	13200000	4	18000000	6	9760000	4	27200000	6	109000000	6	107000000	6	110000000	13	130000000	14	258000000	14	151000000	8	26900000	3	107000000	7	6080000	1	23100000	2	2000000000	63
344	QZT32966.1	DNA translocase FtsK [Caldalkalibacillus thermarum TA2.A1]	8020000	2	7260000	2	1250000	2	4670000	2	0	0	0	0	1080000	1	1210000	2	3160000	2	0	0	0	0	0	1	4180000	2	0	1	8820000	1	8440000	2	0	0	0	0	0	0	14100000	3	0	0
345	QZT35441.1	inositol monophosphatase family protein [Caldalkalibacillus thermarum TA2.A1]	35800000	5	20200000	4	11800000	2	731000	1	618000	1	21000000	4	1240000	1	10300000	4	5700000	2	0	0	32000000	1	25900000	1	544000	2	23300000	2	21300000	4	4740000	2	0	0	0	0	0	0	0	0	113000000	15
346	QZT35027.1	heavy metal translocating P-type ATPase [Caldalkalibacillus thermarum TA2.A1]	35700000	3	15600000	3	27600000	3	6830000	2	22400000	3	17400000	3	13000000	2	13700000	2	8440000	2	0	0	33500000	3	3450000	1	4420000	3	2450000	1	42100000	3	28800000	3	0	0	21900000	4	0	0	5160000	1	7090000	8
347	QZT35469.1	kinase/pyrophosphorylase [Caldalkalibacillus thermarum TA2.A1]	42700000	3	47200000	2	54600000	3	22800000	2	43300000	3	21400000	1	57500000	3	49400000	3	70000000	3	42900000	2	30200000	2	15100000	2	48500000	5	34900000	4	168000000	9	54100000	5	0	1	13500000	2	0	0	22500000	5	338000000	16
348	QZT35290.1	redox-sensing transcriptional repressor Rex [Caldalkalibacillus thermarum TA2.A1]	37200000	2	32300000	2	20700000	3	17700000	2	1540000	1	13300000	2	17300000	2	18300000	3	28700000	2	17100000	1	0	0	0	0	3630000	1	0	1	63700000	5	44200000	3	0	0	2900000	1	0	0	3520000	1	31600000	7
349	QZT34653.1	Asp-tRNA(Asn)/Glu-tRNA(Gln) amidotransferase subunit GatA [Caldalkalibacillus thermarum TA2.A1]	32900000	5	28400000	4	47000000	6	24800000	5	20500000	2	23600000	2	20700000	4	15700000	4	26000000	4	31200000	3	30800000	4	15400000	3	35000000	5	22700000	6	142000000	10	109000000	10	0	0	49400000	4	13000000	1	27800000	4	646000000	32
350	QZT34095.1	extracellular solute-binding protein [Caldalkalibacillus thermarum TA2.A1]	48100000	1	47500000	1	0	0	0	0	0	0	0	0	25500000	2	21600000	2	721000000	11	686000000	9	0	0	0	0	0	0	0	0	4370000000	20	3480000000	18	6630000000	20	7560000000	10	0	0	58400000	3	1660000000	27
351	QZT35160.1	AAA family ATPase [Caldalkalibacillus thermarum TA2.A1]	8320000	3	11700000	4	23500000	4	16000000	2	6140000	3	1310000	2	4760000	1	3970000	3	52800000	5	38900000	1	71800000	9	62700000	10	24500000	6	13100000	7	79100000	10	87600000	15	0	0	23400000	7	0	0	7550000	2	65000000	26
352	QZT34439.1	50S ribosomal protein L15 [Caldalkalibacillus thermarum TA2.A1]	431000000	3	382000000	4	13100000	1	147000000	2	197000000	4	187000000	3	13500000	1	140000000	2	127000000	1	137000000	4	500000000	9	383000000	5	560000000	9	363000000	4	667000000	7	455000000	6	0	0	509000000	5	0	0	36300000	2	94800000	12
353	QZT34683.1	lactate utilization protein C [Caldalkalibacillus thermarum TA2.A1]	189000000	4	126000000	5	216000000	4	149000000	6	102000000	5	98200000	3	114000000	2	134000000	4	231000000	3	222000000	3	16200000	1	42100000	3	42400000	3	52300000	2	415000000	6	230000000	5	11900000	1	34400000	1	0	0	0	0	15700000	6
354	QZT34612.1	adenylosuccinate lyase [Caldalkalibacillus thermarum TA2.A1]	137000000	3	64800000	3	128000000	4	103000000	3	108000000	5	98100000	3	53900000	2	41800000	3	50900000	2	49600000	3	84100000	5	72700000	7	347000000	10	333000000	8	525000000	15	390000000	12	123000000	3	99600000	6	0	0	21600000	2	3090000000	39
355	QZT32736.1	methylglyoxal synthase [Caldalkalibacillus thermarum TA2.A1]	3170000	1	2310000	1	4660000	1	4650000	2	4610000	4	8210000	4	0	0	1300000	1	981000	2	0	1	1780000	1	0	0	14500000	2	27100000	4	18000000	3	8260000	2	0	0	0	0	0	0	0	0	66600000	11
356	QZT32956.1	TIGR00282 family metallophosphoesterase [Caldalkalibacillus thermarum TA2.A1]	12800000	2	9680000	2	11400000	2	6050000	1	9380000	1	17300000	3	6640000	1	5710000	1	10200000	2	6090000	1	21700000	4	2780000	2	37200000	6	13400000	5	46800000	6	42300000	5	0	0	0	0	0	0	12200000	3	28400000	12
357	QZT34451.1	energy-coupling factor transporter ATPase [Caldalkalibacillus thermarum TA2.A1]	17600000	4	23700000	4	6590000	3	1760000	2	11200000	2	21700000	2	5800000	3	8440000	4	20600000	3	0	0	0	0	0	0	0	0	0	0	8630000	1	2980000	1	0	0	0	0	0	0	3990000	1	953000	2
358	QZT34519.1	23S rRNA (adenine(2503)-C(2))-methyltransferase RlmN [Caldalkalibacillus thermarum TA2.A1]	17400000	3	17500000	4	9620000	4	9910000	4	8230000	2	9090000	2	6530000	3	7380000	4	12800000	5	3390000	1	0	0	0	0	8560000	4	5380000	3	7550000	3	9880000	3	0	0	0	0	0	0	3430000	1	23600000	10
359	QZT34348.1	50S ribosomal protein L25/general stress protein Ctc [Caldalkalibacillus thermarum TA2.A1]	124000000	3	143000000	3	40200000	2	46900000	3	78100000	3	62000000	2	95600000	6	59200000	4	38700000	2	30700000	3	472000000	7	516000000	7	520000000	6	546000000	5	827000000	7	728000000	7	0	0	836000000	8	26600000	1	8140000	1	997000000	13
360	QZT33306.1	phosphonate ABC transporter ATP-binding protein [Caldalkalibacillus thermarum TA2.A1]	16800000	2	8300000	1	4130000	1	3440000	1	0	1	0	0	13100000	3	5010000	1	73500000	2	56700000	2	31500000	1	52000000	4	28100000	1	45800000	4	119000000	5	72300000	4	5520000	1	27300000	1	4290000	1	43500000	2	1140000	1
361	QZT33373.1	HDIG domain-containing protein [Caldalkalibacillus thermarum TA2.A1]	7580000	3	78500000	4	18400000	3	10100000	2	12800000	1	9940000	3	8710000	4	27500000	4	107000000	5	87100000	2	2390000	1	0	0	0	0	0	0	32100000	2	27000000	5	4940000	1	40700000	3	0	0	0	0	2290000	7
362	QZT32828.1	ribosome biogenesis GTPase YlqF [Caldalkalibacillus thermarum TA2.A1]	34500000	3	29400000	1	26800000	3	3560000	2	244000	1	928000	1	3140000	1	0	1	12600000	3	4410000	1	23400000	2	12700000	2	14200000	3	18000000	3	32600000	6	37600000	5	0	0	7330000	1	0	0	1670000	2	0	0
363	QZT34950.1	cell wall metabolism sensor histidine kinase WalK [Caldalkalibacillus thermarum TA2.A1]	6080000	2	5100000	1	5930000	1	5520000	1	0	0	0	0	2240000	1	2560000	1	0	0	0	0	0	0	0	0	0	0	0	0	0	0	0	0	0	0	0	0	0	0	0	0	0	0
364	QZT34409.1	50S ribosomal protein L1 [Caldalkalibacillus thermarum TA2.A1]	17600000	1	50500000	2	11500000	1	21600000	2	41700000	4	28800000	3	24300000	2	6290000	1	18000000	1	24600000	1	149000000	7	104000000	7	153000000	6	133000000	6	227000000	8	205000000	8	41600000	2	909000000	10	0	0	17400000	3	239000000	13
365	QZT34253.1	hypothetical protein HUR95_02235 [Caldalkalibacillus thermarum TA2.A1]	18500000	4	8970000	5	20500000	5	6150000	3	15000000	4	11300000	3	28100000	6	7910000	3	12600000	3	2880000	2	4960000	1	4740000	1	6770000	2	4720000	2	9570000	3	19000000	5	0	0	0	0	0	0	0	0	1110000	4
366	QZT34452.1	tRNA pseudouridine(38-40) synthase TruA [Caldalkalibacillus thermarum TA2.A1]	32700000	2	29000000	4	25800000	2	21900000	3	18800000	2	17300000	2	3320000	1	9610000	2	1000000	1	16500000	3	4640000	1	22700000	4	25500000	3	29700000	5	59900000	6	66500000	8	0	0	0	0	10000000	1	0	0	2440000	3
367	QZT33282.1	thiamine phosphate synthase [Caldalkalibacillus thermarum TA2.A1]	42600000	2	39500000	3	86800000	5	54300000	3	6020000	1	11000000	2	61500000	4	28600000	3	114000000	3	80900000	3	16200000	2	11900000	2	25100000	4	13300000	1	68200000	7	64700000	5	0	0	52500000	2	0	0	0	0	678000000	19
368	QZT33902.1	excinuclease ABC subunit UvrA [Caldalkalibacillus thermarum TA2.A1]	4190000	2	3110000	4	12100000	4	4780000	1	5860000	1	7330000	3	9810000	5	6880000	4	12000000	5	8090000	2	7520000	3	4160000	3	36600000	7	28000000	8	21400000	6	12900000	6	0	0	0	0	0	0	0	0	81200000	31
369	QZT33899.1	acyltransferase [Caldalkalibacillus thermarum TA2.A1]	8840000	2	15100000	3	10300000	3	0	1	0	0	0	0	3430000	1	6240000	2	0	0	0	1	0	0	0	0	0	0	0	0	0	0	0	0	0	0	0	0	0	0	0	0	156000	1
370	QZT33798.1	bifunctional adenosylcobinamide kinase/adenosylcobinamide-phosphate guanylyltransferase [Caldalkalibacillus thermarum TA2.A1]	4810000	2	0	0	0	0	0	0	1840000	1	1170000	1	0	0	0	0	0	0	0	0	18000000	1	18700000	1	14100000	1	13500000	1	22400000	2	19200000	2	0	0	0	0	0	0	0	0	16300000	6
371	QZT33463.1	alanine--tRNA ligase [Caldalkalibacillus thermarum TA2.A1]	38900000	3	13900000	3	29400000	4	21300000	3	21000000	5	1620000	2	12700000	3	16100000	5	4930000	2	2710000	2	65500000	6	99200000	7	164000000	14	130000000	11	216000000	12	104000000	8	2540000	1	150000000	10	0	1	45300000	4	374000000	37
372	QZT34937.1	Cof-type HAD-IIB family hydrolase [Caldalkalibacillus thermarum TA2.A1]	7140000	1	5330000	1	1300000	1	7270000	1	7510000	1	6150000	1	0	0	2590000	1	36800000	1	38200000	1	0	0	0	0	12900000	2	3280000	1	5600000	1	4840000	1	0	0	0	0	0	0	15200000	1	221000	1
373	QZT34400.1	23S rRNA (guanosine(2251)-2'-O)-methyltransferase RlmB [Caldalkalibacillus thermarum TA2.A1]	27900000	2	2380000	1	0	0	4100000	1	0	0	722000	1	7000000	1	0	0	0	0	0	0	89400000	5	30100000	4	46300000	6	33100000	4	55000000	6	74700000	7	0	0	47500000	3	0	0	2420000	1	25900000	6
374	QZT34178.1	uracil phosphoribosyltransferase [Caldalkalibacillus thermarum TA2.A1]	54000000	3	32900000	2	14200000	3	12600000	3	49600000	5	32500000	2	52500000	3	37100000	2	60400000	4	73300000	4	29800000	2	26900000	2	99400000	8	71500000	7	89200000	6	71500000	7	57800000	2	0	0	5970000	1	21300000	2	454000000	20
375	QZT34314.1	pyridoxal 5'-phosphate synthase glutaminase subunit PdxT [Caldalkalibacillus thermarum TA2.A1]	15800000	2	4840000	1	52100000	2	49300000	3	0	0	0	0	15800000	3	23200000	3	14200000	1	60100000	3	55800000	4	45000000	2	25800000	3	32300000	2	105000000	6	62300000	3	0	0	34800000	2	0	0	0	0	740000000	12
376	QZT34379.1	lysine--tRNA ligase [Caldalkalibacillus thermarum TA2.A1]	51600000	1	8890000	3	20200000	3	19200000	3	47400000	3	42200000	2	43800000	2	45900000	3	59100000	2	52700000	3	19700000	2	26900000	3	48300000	3	58300000	6	135000000	9	101000000	7	46500000	2	30000000	2	8120000	1	2700000	1	993000000	33
377	QZT34587.1	MogA/MoaB family molybdenum cofactor biosynthesis protein [Caldalkalibacillus thermarum TA2.A1]	5490000	3	5860000	2	2270000	1	3850000	2	12500000	3	19600000	4	5910000	2	3900000	2	0	0	2460000	1	27200000	1	50300000	2	25600000	3	62200000	3	43900000	2	71400000	3	8380000	1	12200000	1	0	0	3610000	1	237000000	8
378	QZT33129.1	N-acetyltransferase [Caldalkalibacillus thermarum TA2.A1]	21500000	3	994000	1	20000000	3	9470000	2	23400000	3	24900000	4	44200000	4	40700000	4	3210000	1	1770000	1	14400000	1	11800000	1	76800000	6	65500000	3	45600000	4	35700000	4	0	0	139000000	3	0	0	0	0	739000000	15
379	QZT32826.1	50S ribosomal protein L19 [Caldalkalibacillus thermarum TA2.A1]	50500000	3	41400000	2	17100000	2	10100000	1	43500000	3	24800000	2	14500000	1	24100000	3	10500000	1	0	0	527000000	2	545000000	4	413000000	5	521000000	5	820000000	5	602000000	6	0	0	0	0	0	0	0	0	131000000	6
380	QZT33379.1	nodulation protein NfeD [Caldalkalibacillus thermarum TA2.A1]	90900000	1	105000000	2	61600000	1	47000000	1	102000000	2	80200000	2	61800000	1	51100000	2	65500000	2	53400000	2	48900000	3	12800000	2	11700000	1	24000000	2	40800000	1	33500000	1	33900000	3	135000000	2	0	0	8930000	1	30500000	6
381	QZT33834.1	cobalt-precorrin-5B (C(1))-methyltransferase [Caldalkalibacillus thermarum TA2.A1]	5240000	2	2150000	1	5810000	2	4720000	2	2270000	1	0	0	2490000	1	1700000	1	3050000	1	3040000	1	0	0	0	0	19700000	2	16500000	1	23700000	2	16300000	3	0	0	0	0	0	0	0	0	1040000	1
382	QZT33108.1	DUF881 domain-containing protein [Caldalkalibacillus thermarum TA2.A1]	47300000	3	45500000	4	8750000	1	34800000	3	24600000	2	21900000	2	36400000	3	25600000	3	25400000	3	34300000	3	51000000	4	47400000	6	61700000	7	32400000	5	47300000	5	42600000	7	0	0	0	0	0	0	19600000	2	0	0
383	QZT33854.1	KamA family radical SAM protein [Caldalkalibacillus thermarum TA2.A1]	21300000	2	5620000	1	7110000	2	3780000	2	5890000	1	3780000	1	4200000	1	0	0	24700000	2	27000000	2	64500000	6	61600000	9	65900000	8	73000000	10	66800000	9	67900000	11	7830000	1	974000	1	0	0	0	0	71200000	21
384	QZT34961.1	primosomal protein DnaI [Caldalkalibacillus thermarum TA2.A1]	28400000	2	42800000	2	6920000	2	8410000	3	23100000	1	0	1	6510000	1	24000000	2	3330000	1	0	0	3330000	1	11700000	2	13700000	3	13500000	3	42200000	4	49000000	5	0	0	0	0	0	0	4340000	1	5390000	5
385	QZT33011.1	response regulator [Caldalkalibacillus thermarum TA2.A1]	19300000	3	1640000	1	0	0	10200000	1	12900000	1	12900000	2	0	0	789000	1	337000	1	5390000	1	0	0	0	0	759000	1	10300000	1	5180000	1	2550000	1	0	0	0	0	0	0	0	0	12800000	4
386	QZT33269.1	ornithine--oxo-acid transaminase [Caldalkalibacillus thermarum TA2.A1]	20700000	2	24500000	4	14600000	2	19400000	3	38200000	5	32200000	5	16600000	2	20100000	5	29300000	4	26400000	4	12800000	1	10200000	2	23200000	3	25200000	6	22200000	5	20700000	6	0	0	6270000	3	0	0	0	0	630000000	27
387	QZT33081.1	peroxiredoxin [Caldalkalibacillus thermarum TA2.A1]	54600000	2	55400000	2	72100000	2	63100000	2	118000000	3	63700000	1	58900000	2	45200000	2	72300000	2	38000000	1	343000000	7	260000000	9	133000000	7	234000000	6	538000000	8	313000000	8	387000000	6	359000000	7	0	0	26600000	1	5250000000	20
388	QZT33512.1	rod shape-determining protein [Caldalkalibacillus thermarum TA2.A1]	98300000	3	93300000	4	100000000	2	87000000	2	55200000	4	11300000	2	51300000	2	76000000	5	185000000	3	157000000	4	281000000	8	320000000	8	365000000	10	358000000	10	642000000	14	511000000	12	0	0	210000000	5	67100000	2	28900000	3	413000000	22
389	QZT34613.1	phosphoribosylaminoimidazolesuccinocarboxamide synthase [Caldalkalibacillus thermarum TA2.A1]	21600000	3	19600000	2	22500000	2	17000000	2	0	0	7490000	1	2120000	1	1830000	1	20800000	2	17200000	1	1200000000	3	593000000	3	47500000	4	35700000	3	47800000	6	25300000	5	0	0	5430000	1	0	0	0	0	122000000	15
390	QZT34137.1	ABC transporter substrate-binding protein [Caldalkalibacillus thermarum TA2.A1]	18700000	3	7280000	2	13800000	3	11300000	3	0	0	0	0	2750000	2	5420000	2	6590000	2	1260000	1	0	0	0	0	21300000	5	31600000	4	23000000	3	40000000	5	0	0	0	0	0	0	0	0	7110000	6
391	QZT34351.1	transcription-repair coupling factor [Caldalkalibacillus thermarum TA2.A1]	15700000	4	16200000	5	15300000	4	14200000	4	5580000	2	1370000	2	2040000	1	3430000	2	23400000	4	12000000	4	10900000	2	12700000	3	5510000	3	2070000	1	37100000	7	17700000	7	0	0	0	0	15500000	1	0	0	89500000	40
392	QZT34702.1	glycine/betaine/sarcosine/D-proline family reductase selenoprotein B [Caldalkalibacillus thermarum TA2.A1]	7950000	2	6250000	1	10200000	1	8570000	1	0	0	0	0	5460000	1	4620000	1	9310000	1	6480000	1	0	0	2240000	1	0	0	0	0	0	0	0	0	0	0	0	0	0	0	0	0	389000000	13
393	QZT33029.1	FADH(2)-oxidizing methylenetetrahydrofolate--tRNA-(uracil(54)-C(5))-methyltransferase TrmFO [Caldalkalibacillus thermarum TA2.A1]	5400000	2	3680000	1	5260000	2	2870000	1	9160000	1	8820000	1	0	0	1220000	1	0	0	9550000	1	2970000	1	1650000	1	9360000	4	7400000	3	2490000	1	5420000	2	0	0	0	0	0	0	0	0	46300000	15
394	QZT34434.1	30S ribosomal protein S8 [Caldalkalibacillus thermarum TA2.A1]	370000000	1	338000000	2	313000000	2	263000000	2	69000000	2	80300000	3	155000000	2	168000000	3	219000000	1	242000000	3	486000000	4	486000000	6	524000000	7	509000000	8	314000000	7	219000000	5	23900000	3	201000000	3	238000000	3	282000000	2	538000000	11
395	QZT32912.1	DsrE/DsrF/DrsH-like family protein [Caldalkalibacillus thermarum TA2.A1]	15600000	1	13700000	1	16300000	1	18900000	1	6710000	1	6020000	1	10200000	1	8970000	1	10100000	1	9490000	1	0	0	0	0	0	0	0	1	21600000	3	15700000	2	0	1	13800000	2	0	0	0	0	131000000	9
396	QZT34272.1	BMC domain-containing protein [Caldalkalibacillus thermarum TA2.A1]	14400000	2	11400000	2	11000000	1	9630000	1	0	0	0	0	0	0	0	0	19300000	2	15500000	1	0	0	3120000	2	427000	1	395000	1	4280000	1	4230000	2	0	0	12000000	1	0	0	0	0	205000000	5
397	QZT35124.1	hypothetical protein HUR95_07875 [Caldalkalibacillus thermarum TA2.A1]	11600000	1	10500000	1	22800000	2	22500000	2	0	0	0	0	0	0	7070000	1	61500000	2	39700000	2	0	0	0	0	0	0	0	0	185000000	5	166000000	6	106000000	4	0	0	0	0	0	0	18200000	4
398	QZT33430.1	efflux RND transporter periplasmic adaptor subunit [Caldalkalibacillus thermarum TA2.A1]	3930000	2	5690000	3	0	0	0	0	1660000	1	5670000	4	4720000	2	1620000	1	738000	1	0	0	50600000	4	43100000	3	40000000	3	26500000	2	26300000	4	24900000	4	0	0	0	0	0	0	0	0	7130000	4
399	QZT34536.1	glutamate-5-semialdehyde dehydrogenase [Caldalkalibacillus thermarum TA2.A1]	28800000	2	26200000	2	30700000	2	18800000	1	0	0	0	0	11800000	1	26900000	4	22600000	3	6540000	1	0	0	1470000	1	16600000	4	10500000	3	54000000	3	46300000	2	0	0	0	0	0	0	0	0	3840000000	21
400	QZT35101.1	class I SAM-dependent methyltransferase [Caldalkalibacillus thermarum TA2.A1]	9620000	2	11100000	3	16300000	2	15200000	3	7730000	5	2910000	1	10000000	5	4910000	3	18800000	4	9370000	3	0	0	8760000	2	15400000	2	12700000	3	57300000	6	25800000	5	6100000	2	0	0	0	0	0	0	44800000	14
401	QZT35285.1	diadenylate cyclase CdaA [Caldalkalibacillus thermarum TA2.A1]	34000000	2	31900000	2	31100000	2	28300000	2	31100000	1	27400000	2	23600000	2	24900000	3	44600000	2	23100000	1	1010000	1	16500000	2	17200000	1	22600000	2	33500000	2	24200000	2	0	0	10600000	1	0	0	10600000	1	8950000	5
402	QZT34939.1	NAD-dependent malic enzyme [Caldalkalibacillus thermarum TA2.A1]	5730000	2	5590000	2	16900000	4	9690000	3	4600000	2	6580000	3	8810000	2	8380000	4	6220000	2	0	0	48700000	4	44300000	4	33800000	4	22600000	2	92500000	8	72800000	9	0	0	54600000	4	0	0	0	0	521000000	23
403	QZT34656.1	DUF1002 domain-containing protein [Caldalkalibacillus thermarum TA2.A1]	257000000	2	242000000	2	146000000	2	130000000	2	187000000	2	159000000	2	38100000	1	137000000	3	20300000	1	99000000	2	281000000	2	220000000	3	312000000	2	476000000	2	591000000	3	573000000	3	0	0	0	0	120000000	5	0	0	59400000	4
404	QZT32864.1	fructosamine kinase family protein [Caldalkalibacillus thermarum TA2.A1]	23900000	2	27900000	3	34900000	3	38300000	2	54100000	4	50900000	3	33000000	2	24000000	3	39200000	3	0	0	0	1	0	1	4580000	2	16000000	2	9060000	1	0	0	0	1	0	0	0	0	0	0	9820000	4
405	QZT33260.1	ABC transporter permease [Caldalkalibacillus thermarum TA2.A1]	1760000	1	0	0	0	0	0	0	0	0	1030000	1	0	0	1040000	1	0	1	0	1	0	0	0	0	0	0	0	0	0	0	0	0	0	0	0	0	0	0	0	0	229000	1
406	QZT35056.1	YtxH domain-containing protein [Caldalkalibacillus thermarum TA2.A1]	60100000	2	182000000	2	105000000	2	58600000	1	309000000	7	192000000	4	110000000	3	99600000	2	108000000	3	47500000	1	583000000	6	506000000	5	780000000	7	714000000	8	1110000000	8	866000000	7	263000000	2	3660000000	8	31800000	1	652000000	4	328000000	12
407	QZT33377.1	hypothetical protein HUR95_14140 [Caldalkalibacillus thermarum TA2.A1]	175000000	2	260000000	3	115000000	2	139000000	3	178000000	3	151000000	3	105000000	2	61100000	1	127000000	2	89000000	3	340000000	4	422000000	5	361000000	5	332000000	6	538000000	9	372000000	8	0	0	496000000	4	10500000	1	338000000	3	106000000	8
408	QZT33608.1	YIP1 family protein [Caldalkalibacillus thermarum TA2.A1]	13300000	1	0	0	17100000	1	2590000	1	0	0	0	0	0	1	2780000	1	0	0	10400000	1	0	0	0	0	0	0	0	0	0	0	0	0	0	0	0	0	0	0	0	0	7350000	2
409	QZT35104.1	EcsC family protein [Caldalkalibacillus thermarum TA2.A1]	18600000	2	25500000	2	2820000	1	5170000	1	0	0	0	0	0	0	0	0	29900000	2	14600000	1	0	0	0	0	1980000	2	0	0	1120000	1	1210000	1	0	0	0	0	0	0	0	0	11000000	4
410	QZT34843.1	molybdopterin-dependent oxidoreductase [Caldalkalibacillus thermarum TA2.A1]	4540000	3	2090000	2	2820000	2	10400000	2	0	0	0	0	10100000	1	12400000	2	4530000	2	0	0	0	0	0	0	0	0	0	0	16000000	3	12800000	2	0	0	0	0	0	0	0	0	262000000	17
411	QZT34286.1	ParB/RepB/Spo0J family partition protein [Caldalkalibacillus thermarum TA2.A1]	11900000	3	8300000	1	14100000	1	4720000	2	6990000	1	6230000	1	4260000	1	4750000	2	23600000	2	21500000	1	69800000	3	67100000	4	55400000	5	54000000	7	89900000	8	31000000	5	0	0	5200000	1	0	0	1250000	1	2820000	3
412	QZT32642.1	Xaa-Pro peptidase family protein [Caldalkalibacillus thermarum TA2.A1]	5050000	1	0	0	0	0	4370000	1	8410000	2	7700000	2	0	0	3370000	1	4800000	1	6340000	1	7690000	2	7450000	2	6930000	2	2460000	1	6380000	2	3930000	2	6840000	1	0	0	0	0	0	0	169000000	18
413	QZT33759.1	Fe-S cluster assembly protein SufD [Caldalkalibacillus thermarum TA2.A1]	8030000	3	35200000	6	44500000	4	37900000	5	45200000	5	29500000	4	46400000	6	26000000	5	28400000	3	39000000	4	278000000	8	248000000	9	317000000	14	359000000	15	375000000	13	255000000	12	9340000	1	502000000	11	0	0	4260000	1	6690000000	42
414	QZT33481.1	protein translocase subunit SecD [Caldalkalibacillus thermarum TA2.A1]	149000000	3	117000000	3	170000000	3	78300000	3	135000000	4	89300000	4	102000000	4	78500000	3	63100000	3	40200000	4	6450000	1	6120000	1	8940000	2	0	0	241000000	6	196000000	7	16800000	2	0	0	0	0	0	0	68800000	8
415	QZT34284.1	DUF951 domain-containing protein [Caldalkalibacillus thermarum TA2.A1]	19300000	1	0	1	0	0	0	0	23000000	2	13100000	2	1690000	1	0	0	0	0	0	0	0	0	0	0	10700000	1	0	0	25400000	3	16600000	3	0	0	0	0	0	0	18300000	1	21700000	3
416	QZT34063.1	DUF86 domain-containing protein [Caldalkalibacillus thermarum TA2.A1]	20000000	2	29900000	2	35500000	2	13100000	2	23000000	1	0	0	15500000	2	13600000	2	22300000	2	20100000	2	5650000	1	12100000	2	10000000	2	439000	1	20100000	3	17400000	2	0	0	0	0	0	0	0	0	484000000	11
417	QZT35507.1	YutD family protein [Caldalkalibacillus thermarum TA2.A1]	12000000	2	0	0	0	1	6400000	1	0	1	1050000	1	0	0	0	0	0	1	2090000	2	0	0	0	0	0	0	10400000	2	15100000	1	18600000	2	0	0	0	0	0	0	0	0	2950000	3
418	QZT34646.1	cobalamin-binding protein [Caldalkalibacillus thermarum TA2.A1]	34100000	2	29600000	1	29200000	2	29100000	3	21600000	4	44600000	4	13200000	3	15200000	2	32500000	4	13800000	2	28300000	1	27700000	2	117000000	7	80800000	3	99400000	4	92200000	4	0	0	0	0	0	0	0	0	80900000	10
419	QZT33796.1	cob(I)yrinic acid a c-diamide adenosyltransferase [Caldalkalibacillus thermarum TA2.A1]	10100000	2	9400000	2	1750000	1	0	0	0	0	0	0	0	0	0	0	5340000	1	0	0	0	0	0	0	0	0	0	0	36400000	2	21600000	1	0	0	28200000	2	0	0	2400000	1	138000000	12
420	QZT34669.1	fumarate hydratase [Caldalkalibacillus thermarum TA2.A1]	15400000	2	16500000	4	37400000	4	30400000	7	32600000	5	25500000	3	31000000	5	27400000	5	21600000	3	11600000	2	222000000	9	215000000	8	187000000	9	204000000	12	276000000	15	272000000	13	12200000	3	160000000	7	0	0	29300000	2	1190000000	31
421	QZT34645.1	ferritin-like domain-containing protein [Caldalkalibacillus thermarum TA2.A1]	327000000	2	295000000	2	221000000	1	196000000	1	435000000	4	412000000	4	254000000	3	224000000	1	145000000	2	151000000	2	861000000	5	800000000	6	863000000	5	823000000	4	1080000000	6	822000000	5	914000000	7	4310000000	8	525000000	9	898000000	6	4450000000	14
422	QZT32943.1	tRNA (N6-isopentenyl adenosine(37)-C2)-methylthiotransferase MiaB [Caldalkalibacillus thermarum TA2.A1]	52400000	3	8790000	1	71500000	3	0	0	6400000	2	0	0	31800000	2	33100000	2	0	0	23300000	1	87100000	5	98300000	5	72700000	4	80100000	6	206000000	9	99300000	8	0	0	49400000	6	0	0	0	0	37900000	11
423	QZT35250.1	acyl-CoA dehydrogenase [Caldalkalibacillus thermarum TA2.A1]	5220000	4	11000000	3	35900000	5	28800000	5	19100000	4	10000000	4	21100000	3	20000000	4	3280000	1	9340000	2	4910000	2	0	0	46200000	5	53300000	7	185000000	6	53100000	8	29400000	2	34300000	6	0	0	16000000	3	154000000	17
424	QZT34929.1	disulfide bond formation protein B [Caldalkalibacillus thermarum TA2.A1]	5910000	1	5620000	1	5750000	1	4740000	1	4140000	1	3800000	1	4940000	1	0	0	2930000	1	2460000	1	0	0	0	0	0	0	0	0	0	0	0	0	0	0	0	0	0	0	0	0	660000	1
425	QZT34176.1	acetyl-CoA C-acetyltransferase [Caldalkalibacillus thermarum TA2.A1]	10300000	2	0	0	11600000	3	3330000	2	3910000	2	2820000	2	10900000	2	9170000	3	0	0	0	0	24100000	7	22300000	5	55300000	9	38300000	8	59800000	8	54900000	9	0	0	44600000	4	0	0	13600000	2	757000000	25
426	QZT32482.1	DoxX family protein [Caldalkalibacillus thermarum TA2.A1]	32500000	1	28800000	1	34300000	1	34600000	1	28500000	1	23200000	1	17300000	1	16300000	1	0	0	23700000	1	0	0	0	0	0	0	0	0	1040000	1	760000	1	0	0	0	0	0	0	0	0	144000000	4
427	QZT33103.1	arginine--tRNA ligase [Caldalkalibacillus thermarum TA2.A1]	8490000	3	0	1	2020000	2	5620000	3	0	0	1300000	1	4560000	2	2060000	2	4970000	2	2930000	2	9280000	2	15700000	3	16600000	3	10000000	2	24800000	6	19600000	8	0	0	12600000	1	0	0	1730000	1	1130000000	45
428	QZT34337.1	methionine--tRNA ligase [Caldalkalibacillus thermarum TA2.A1]	27400000	2	12200000	2	39200000	2	34400000	2	5120000	2	13700000	3	11800000	1	15600000	1	1290000	1	16600000	2	25400000	4	16100000	2	39600000	9	40800000	10	32400000	5	35400000	6	7810000	1	18000000	2	0	0	5600000	1	1570000000	48
429	QZT34916.1	ATP-binding cassette domain-containing protein [Caldalkalibacillus thermarum TA2.A1]	21800000	2	14900000	2	16900000	2	9950000	2	9020000	1	6620000	1	11100000	2	2520000	1	4790000	1	0	0	0	0	0	0	2110000	1	0	0	567000	1	0	0	0	0	0	0	0	0	0	0	5680000	4
430	QZT32652.1	Asp23/Gls24 family envelope stress response protein [Caldalkalibacillus thermarum TA2.A1]	69900000	1	68100000	1	29300000	1	13900000	1	22700000	1	27300000	1	28400000	1	12300000	1	5210000	1	7640000	1	22400000	1	21200000	1	0	1	0	0	10100000	1	0	0	0	0	0	0	0	0	0	0	24600000	2
431	QZT35373.1	2 3 4 5-tetrahydropyridine-2 6-dicarboxylate N-acetyltransferase [Caldalkalibacillus thermarum TA2.A1]	3000000	2	1890000	1	9120000	2	6890000	2	0	0	0	0	3130000	2	0	1	9320000	1	9630000	1	0	0	0	0	7570000	1	22400000	3	12200000	1	13200000	2	0	0	38200000	3	0	0	0	0	749000000	14
432	QZT32978.1	bifunctional riboflavin kinase/FAD synthetase [Caldalkalibacillus thermarum TA2.A1]	9050000	2	0	0	3870000	1	0	0	0	0	0	0	0	0	1200000	1	5200000	1	0	0	0	0	0	0	0	0	0	0	9920000	2	13200000	4	0	0	0	0	0	0	0	0	8480000	6
433	QZT33316.1	molybdopterin biosynthesis protein [Caldalkalibacillus thermarum TA2.A1]	16400000	3	24500000	5	33800000	3	37700000	5	72200000	5	44700000	5	61100000	5	54400000	5	43400000	6	43200000	4	58100000	3	67400000	4	106000000	6	81500000	6	199000000	16	149000000	10	64900000	3	0	0	11500000	1	0	0	737000000	26
434	QZT34092.1	ABC transporter ATP-binding protein [Caldalkalibacillus thermarum TA2.A1]	17300000	3	4590000	1	0	0	29600000	2	10100000	2	8690000	2	0	0	2140000	1	8910000	2	45100000	2	28100000	5	21100000	4	24100000	4	18700000	4	82400000	8	66900000	6	0	0	0	0	0	0	12300000	2	13100000	9
435	QZT33912.1	cell division ATP-binding protein FtsE [Caldalkalibacillus thermarum TA2.A1]	113000000	2	109000000	3	94400000	2	84100000	2	101000000	3	81800000	2	86300000	2	72900000	2	36100000	2	63200000	2	87000000	4	67500000	4	142000000	5	130000000	6	183000000	8	116000000	5	11900000	1	0	0	0	0	3220000	1	0	0
436	QZT34615.1	phosphoribosylformylglycinamidine synthase subunit PurQ [Caldalkalibacillus thermarum TA2.A1]	9990000	2	6090000	1	15500000	2	0	2	25800000	2	6420000	1	6830000	1	4610000	2	3820000	1	3010000	2	64500000	2	42200000	2	57400000	2	49700000	1	162000000	4	95500000	3	14900000	2	0	0	0	0	0	1	27700000	5
437	QZT35102.1	acetate kinase [Caldalkalibacillus thermarum TA2.A1]	8530000	3	3610000	3	14200000	5	4510000	3	3290000	2	2610000	2	8010000	4	3840000	2	3570000	2	1900000	1	9430000	1	10900000	3	50000000	8	39800000	8	66300000	10	42600000	7	0	0	0	0	0	0	5430000	1	82900000	21
438	QZT35116.1	GTP pyrophosphokinase family protein [Caldalkalibacillus thermarum TA2.A1]	31000000	2	32900000	3	20600000	1	17700000	1	0	0	0	0	17300000	1	18400000	2	15700000	1	13000000	1	25100000	2	85900000	2	67600000	5	53600000	4	56300000	5	36300000	4	0	0	16200000	2	0	0	0	0	32800000	8
439	QZT32948.1	cytochrome c oxidase subunit I [Caldalkalibacillus thermarum TA2.A1]	44400000	3	10200000	1	23200000	2	8990000	1	5330000	1	53700000	2	44900000	2	45800000	3	67500000	4	57000000	3	31400000	1	80600000	2	75700000	2	111000000	3	412000000	5	380000000	5	17000000	1	549000000	2	0	0	167000000	2	407000000	10
440	QZT35177.1	bis-aminopropyl spermidine synthase family protein [Caldalkalibacillus thermarum TA2.A1]	18100000	1	17200000	1	23400000	1	19900000	1	26700000	2	0	0	20200000	1	16800000	1	18600000	2	9990000	1	8220000	3	21400000	3	60300000	6	46000000	4	61300000	8	41400000	5	0	0	12100000	1	0	0	0	0	1110000000	27
441	QZT34946.1	citrate synthase [Caldalkalibacillus thermarum TA2.A1]	28500000	3	27000000	4	45300000	4	60100000	7	2620000	2	1510000	1	33200000	4	25600000	4	35300000	5	101000000	5	9080000	1	15700000	1	321000	2	6010000	2	87400000	8	66700000	7	13800000	1	0	0	0	0	0	0	2040000000	29
442	QZT34682.1	D-glycerate dehydrogenase [Caldalkalibacillus thermarum TA2.A1]	2940000	1	0	0	0	0	0	0	4690000	1	7460000	2	4310000	1	0	1	0	1	0	0	0	0	0	0	2320000	1	1940000	1	0	2	5760000	3	0	0	0	0	0	0	1580000	1	219000000	20
443	QZT35494.1	ATP-binding cassette domain-containing protein [Caldalkalibacillus thermarum TA2.A1]	31800000	1	32900000	2	29300000	3	22300000	2	72800000	2	55000000	2	33700000	2	8450000	2	9760000	2	0	0	2630000	2	1780000	2	17500000	4	38800000	3	85700000	3	3980000	1	0	0	0	0	0	0	60200000	2	7210000	3
444	QZT33266.1	acetate--CoA ligase [Caldalkalibacillus thermarum TA2.A1]	3100000	2	2280000	2	4960000	3	4360000	3	0	0	0	1	2950000	2	2390000	3	785000	1	3920000	2	12700000	1	55800000	6	10000000	2	36700000	6	87100000	10	58400000	7	0	0	7060000	1	0	0	0	0	1210000000	39
445	QZT33317.1	molybdopterin molybdotransferase MoeA [Caldalkalibacillus thermarum TA2.A1]	7290000	3	11600000	3	35000000	5	27600000	3	14000000	2	9990000	1	4280000	2	24100000	5	29200000	3	27500000	4	813000	1	3050000	1	20000000	1	2450000	1	47700000	3	13900000	2	0	0	24200000	1	0	0	8610000	1	107000000	11
446	QZT34356.1	HU family DNA-binding protein [Caldalkalibacillus thermarum TA2.A1]	108000000	2	17200000	2	11400000	2	79000000	3	100000000	3	100000000	3	14200000	1	1070000	1	6080000	1	71300000	3	571000000	3	454000000	4	300000000	4	375000000	4	435000000	4	319000000	3	42400000	2	2270000000	2	0	0	920000000	3	541000000	7
447	QZT35384.1	transcriptional regulator ArgR [Caldalkalibacillus thermarum TA2.A1]	96100000	2	3140000	1	39400000	2	0	0	31000000	2	22700000	1	16200000	1	11500000	1	6910000	1	0	0	0	0	0	0	0	0	0	0	30400000	1	24400000	1	34900000	1	0	0	0	0	75700000	1	16800000	5
448	QZT35232.1	ABC transporter substrate-binding protein [Caldalkalibacillus thermarum TA2.A1]	39200000	1	35400000	1	22500000	1	19400000	1	3360000	1	0	0	27500000	1	25700000	1	20000000	1	16500000	1	0	0	0	0	13000000	2	12100000	2	272000000	2	221000000	3	92200000	5	0	0	18100000	1	53100000	2	1900000000	16
449	QZT32711.1	demethylmenaquinone methyltransferase [Caldalkalibacillus thermarum TA2.A1]	31500000	2	31200000	2	20200000	2	16700000	2	19500000	2	21800000	2	17600000	2	14300000	2	0	0	1840000	2	6450000	1	4420000	1	8970000	1	13500000	2	17200000	3	7010000	1	0	0	16700000	1	0	0	7590000	2	481000	2
450	QZT33726.1	recombinase family protein [Caldalkalibacillus thermarum TA2.A1]	9770000	2	5520000	2	6560000	3	15500000	2	6570000	2	3620000	1	5370000	2	2900000	1	35900000	4	15900000	3	16300000	1	14300000	2	23100000	4	18000000	2	14300000	2	6130000	3	0	0	0	0	0	0	6700000	1	0	0
451	QZT34321.1	PAS domain S-box protein [Caldalkalibacillus thermarum TA2.A1]	44700000	2	47200000	3	46200000	4	36600000	4	10600000	1	35400000	1	34800000	3	33900000	5	15500000	3	0	0	38500000	5	29900000	5	56100000	6	61100000	6	87500000	6	58200000	5	10200000	1	0	0	0	0	0	0	32600000	10
452	QZT34265.1	single-stranded DNA-binding protein [Caldalkalibacillus thermarum TA2.A1]	4420000	1	3400000	1	2990000	1	6550000	2	2240000	1	0	0	2460000	1	1750000	1	0	0	3020000	1	4960000	1	4020000	1	5980000	1	6680000	1	29300000	3	0	0	4140000	2	0	0	0	0	0	0	81100000	6
453	QZT33662.1	hypothetical protein HUR95_15765 [Caldalkalibacillus thermarum TA2.A1]	1010000	2	0	0	8750000	2	583000	1	0	0	0	1	0	0	5590000	2	0	0	0	0	20500000	1	8300000	1	27500000	3	22000000	3	27800000	3	24300000	3	0	0	0	0	0	0	0	0	162000000	6
454	QZT33689.1	DNA cytosine methyltransferase [Caldalkalibacillus thermarum TA2.A1]	32300000	2	23000000	1	33500000	3	31000000	2	4980000	2	2990000	1	12400000	1	8680000	1	39500000	3	32600000	2	18300000	2	0	1	34000000	4	11500000	3	29500000	5	28100000	4	0	0	17800000	2	0	0	0	0	39700000	11
455	QZT32821.1	signal recognition particle protein [Caldalkalibacillus thermarum TA2.A1]	24600000	4	38000000	5	21000000	5	8220000	3	24400000	3	22800000	5	55700000	4	54700000	6	72800000	3	57800000	3	11400000	4	52100000	6	80900000	8	53500000	7	96200000	11	59300000	10	14500000	2	12500000	2	0	0	0	0	91600000	21
456	QZT33063.1	hypothetical protein HUR95_12145 [Caldalkalibacillus thermarum TA2.A1]	16600000	3	11600000	2	15100000	3	13200000	3	5130000	2	2130000	1	5800000	2	13300000	2	15900000	2	17500000	2	5600000	1	11700000	3	18800000	4	23900000	5	33200000	3	13500000	2	0	0	0	0	0	0	0	0	19900000	10
457	QZT32971.1	aspartate-semialdehyde dehydrogenase [Caldalkalibacillus thermarum TA2.A1]	51400000	4	124000000	5	181000000	6	184000000	7	44100000	6	31900000	4	147000000	9	119000000	6	146000000	8	75400000	6	6080000	2	28700000	3	77400000	8	65900000	8	240000000	14	281000000	11	0	0	52000000	2	0	0	41200000	3	1420000000	28
458	QZT33201.1	hypothetical protein HUR95_12975 [Caldalkalibacillus thermarum TA2.A1]	18700000	2	19600000	2	21400000	2	14000000	2	0	0	3240000	1	0	1	6400000	2	0	0	0	0	83600000	2	76200000	2	57400000	3	55600000	2	78500000	3	64400000	3	0	0	0	0	0	0	5830000	1	0	0
459	QZT33386.1	twin-arginine translocation signal domain-containing protein [Caldalkalibacillus thermarum TA2.A1]	12100000	3	11500000	3	0	0	0	0	5870000	1	4410000	1	0	0	1330000	1	1650000	1	0	0	15600000	1	16500000	1	13000000	1	3590000	1	11400000	1	3310000	1	0	0	0	0	0	0	0	0	0	0
460	QZT34198.1	TetR/AcrR family transcriptional regulator [Caldalkalibacillus thermarum TA2.A1]	6170000	2	1590000	1	905000	1	869000	1	1660000	1	0	0	1270000	1	1860000	2	0	0	0	0	18500000	2	11600000	2	2410000	1	10200000	5	1850000	2	8610000	3	0	0	0	0	0	0	0	0	1280000	2
461	QZT34349.1	aminoacyl-tRNA hydrolase [Caldalkalibacillus thermarum TA2.A1]	31400000	5	2820000	1	56300000	2	25800000	2	51400000	3	15300000	2	3650000	1	2520000	1	155000000	3	131000000	3	27100000	1	27500000	2	51900000	3	0	0	183000000	6	167000000	8	11100000	2	71500000	4	0	0	27900000	1	414000000	9
462	QZT33516.1	hypothetical protein HUR95_14905 [Caldalkalibacillus thermarum TA2.A1]	20100000	1	21500000	2	23800000	1	19000000	1	19200000	2	4030000	1	23100000	2	19400000	2	28000000	2	18800000	2	1860000	1	2390000	1	2720000	2	14400000	2	29100000	2	33600000	3	0	1	0	0	0	0	0	0	193000	1
463	QZT34827.1	NAD-dependent succinate-semialdehyde dehydrogenase [Caldalkalibacillus thermarum TA2.A1]	7650000	2	3030000	1	7070000	2	5820000	2	0	0	0	0	1900000	1	2050000	2	12200000	3	8380000	2	0	0	2090000	2	6470000	3	0	0	20600000	4	16000000	4	0	0	0	0	1340000	1	0	0	835000000	33
464	QZT34769.1	amidohydrolase [Caldalkalibacillus thermarum TA2.A1]	53700000	2	25800000	1	77300000	2	71300000	2	80700000	2	46400000	3	25100000	2	37600000	2	45100000	2	58000000	3	27700000	6	16900000	4	51900000	7	46400000	8	51200000	5	65400000	7	21800000	1	0	0	0	0	0	0	1160000000	22
465	QZT34928.1	DsbA family protein [Caldalkalibacillus thermarum TA2.A1]	15400000	1	6310000	1	19100000	1	8470000	2	0	0	0	0	6230000	1	4520000	1	16900000	1	19500000	1	0	0	0	0	0	0	0	0	0	0	0	0	0	0	0	0	0	0	0	0	0	0
466	QZT32599.1	phosphoglycerate dehydrogenase [Caldalkalibacillus thermarum TA2.A1]	7560000	3	3800000	2	6820000	2	5050000	2	1190000	2	0	0	3350000	1	2600000	1	2550000	1	1440000	1	5200000	1	5600000	1	14900000	5	13200000	4	18800000	6	9120000	3	0	0	0	0	0	0	0	0	694000000	35
467	QZT34052.1	ABC transporter ATP-binding protein [Caldalkalibacillus thermarum TA2.A1]	70100000	2	66300000	3	53000000	2	60000000	3	66500000	4	58800000	3	52600000	3	41300000	2	52300000	3	32600000	3	6920000	1	0	0	47000000	3	45300000	4	67600000	3	58200000	4	0	0	3530000	1	0	0	3100000	1	6720000	4
468	QZT32988.1	proline--tRNA ligase [Caldalkalibacillus thermarum TA2.A1]	4120000	2	27400000	3	13000000	2	5650000	1	3320000	1	3430000	1	15500000	3	17700000	3	6630000	2	7460000	2	5180000	3	4350000	3	45300000	6	2100000	2	18200000	5	15100000	4	0	0	1180000	1	0	0	0	0	625000000	36
469	QZT34610.1	5-(carboxyamino)imidazole ribonucleotide mutase [Caldalkalibacillus thermarum TA2.A1]	6830000	1	19700000	1	26400000	2	22100000	2	0	1	4300000	1	13700000	1	11100000	2	44600000	2	26600000	2	0	0	0	0	7630000	2	2700000	1	44800000	3	37200000	3	0	0	18900000	3	0	0	0	0	478000000	11
470	QZT34411.1	50S ribosomal protein L7/L12 [Caldalkalibacillus thermarum TA2.A1]	13200000	1	42500000	2	5750000	1	5200000	1	47000000	2	48500000	2	10800000	1	8880000	1	0	0	0	0	1620000000	8	1700000000	8	1330000000	7	614000000	7	1400000000	7	963000000	8	236000000	1	2690000000	6	9650000	1	297000000	4	620000000	11
471	QZT34346.1	bifunctional UDP-N-acetylglucosamine diphosphorylase/glucosamine-1-phosphate N-acetyltransferase GlmU [Caldalkalibacillus thermarum TA2.A1]	10800000	2	13300000	3	0	0	2490000	1	14900000	3	6220000	1	5970000	2	4380000	1	7650000	1	7280000	2	2330000	1	0	0	0	0	8590000	1	14900000	1	30600000	4	0	0	0	0	0	0	0	0	156000000	12
472	QZT34886.1	heavy metal translocating P-type ATPase [Caldalkalibacillus thermarum TA2.A1]	57900000	3	0	2	35700000	1	40300000	1	38300000	1	38100000	2	30900000	1	27000000	3	4810000	1	23200000	1	17700000	5	45300000	7	71500000	8	75100000	11	50300000	7	40000000	5	0	0	13000000	3	3570000	1	21900000	4	4380000	7
473	QZT34589.1	co-chaperone GroES [Caldalkalibacillus thermarum TA2.A1]	12500000	2	7910000	1	10900000	1	10300000	1	59000000	2	39400000	1	13600000	1	12600000	1	12100000	2	10600000	2	885000000	4	777000000	3	1020000000	4	988000000	4	1220000000	5	981000000	5	0	0	6050000000	3	0	0	136000000	2	14400000000	16
474	QZT33301.1	rhomboid family intramembrane serine protease [Caldalkalibacillus thermarum TA2.A1]	39800000	3	24800000	2	13500000	2	19800000	3	29000000	6	16900000	3	18100000	4	15300000	4	7210000	3	7510000	2	0	0	0	0	0	0	0	0	1080000	2	7630000	3	0	0	0	0	0	0	0	0	0	0
475	QZT33547.1	homocysteine synthase [Caldalkalibacillus thermarum TA2.A1]	36500000	4	21200000	3	28400000	3	36900000	3	18500000	3	15100000	5	34400000	3	42400000	4	13500000	4	44200000	3	17400000	2	8350000	2	54200000	5	66200000	6	101000000	10	30600000	6	0	1	28000000	2	16600000	1	14900000	1	1870000000	25
476	QZT35458.1	glycine oxidase ThiO [Caldalkalibacillus thermarum TA2.A1]	32300000	3	20000000	2	13100000	2	2120000	1	13800000	3	10200000	2	0	1	3540000	1	58000000	3	48900000	2	10200000	1	5850000	1	17800000	3	27800000	4	63500000	4	78600000	6	7840000	1	0	0	0	0	0	0	201000000	18
477	QZT35176.1	glutathione peroxidase [Caldalkalibacillus thermarum TA2.A1]	97400000	2	33800000	1	106000000	2	92000000	2	68400000	2	34000000	2	58100000	1	36700000	2	51000000	2	33500000	1	1980000	1	936000	1	18700000	3	18600000	2	104000000	5	94400000	3	0	0	0	0	0	0	0	0	4130000	5
478	QZT34494.1	glutamine--fructose-6-phosphate transaminase (isomerizing) [Caldalkalibacillus thermarum TA2.A1]	27800000	2	20600000	2	36900000	2	37700000	4	35500000	6	37300000	6	28300000	4	36600000	5	59500000	3	27800000	2	34000000	4	26400000	3	74000000	7	54300000	5	75000000	5	50400000	5	0	0	0	0	0	0	0	0	173000000	24
479	QZT34201.1	acetyl-CoA C-acetyltransferase [Caldalkalibacillus thermarum TA2.A1]	30500000	3	0	0	12000000	1	11200000	3	31600000	2	25900000	4	14300000	2	17500000	4	42500000	5	24400000	3	43800000	7	16800000	4	45400000	9	34800000	5	90800000	8	62000000	7	0	0	27000000	3	0	0	0	0	397000000	20
480	QZT35155.1	zinc metallopeptidase [Caldalkalibacillus thermarum TA2.A1]	104000000	1	63100000	2	87900000	1	56900000	1	47800000	3	28700000	2	59700000	1	63400000	2	131000000	3	120000000	4	0	0	0	0	0	0	0	0	0	0	0	0	0	0	0	0	0	0	0	0	912000	2
481	QZT33332.1	penicillin-binding protein 2 [Caldalkalibacillus thermarum TA2.A1]	27100000	3	0	0	47600000	3	17200000	3	44500000	3	0	0	37300000	3	1100000	1	30800000	2	8330000	2	0	0	0	1	41100000	5	31300000	7	42200000	9	17200000	2	0	0	0	0	0	0	2350000	1	0	1
482	QZT35477.1	tRNA 2-thiouridine(34) synthase MnmA [Caldalkalibacillus thermarum TA2.A1]	9960000	2	23300000	3	13700000	3	8130000	3	9370000	2	4620000	2	3810000	1	491000	1	1790000	1	0	0	7660000	1	10200000	1	28500000	3	33000000	2	60200000	6	32500000	4	3700000	1	0	0	0	0	0	0	120000000	16
483	QZT34180.1	TIGR01440 family protein [Caldalkalibacillus thermarum TA2.A1]	23700000	1	1260000	1	15200000	1	0	1	16500000	1	12900000	1	0	0	12200000	2	0	0	17000000	2	0	0	0	1	8960000	3	5630000	3	14200000	4	7420000	3	0	0	0	0	0	0	0	0	322000000	11
484	QZT33452.1	b(o/a)3-type cytochrome-c oxidase subunit 1 [Caldalkalibacillus thermarum TA2.A1]	103000000	3	86700000	3	99300000	3	81200000	3	18500000	2	11500000	1	52800000	3	15900000	2	153000000	3	118000000	4	20300000	1	16400000	1	30500000	2	12800000	1	263000000	3	240000000	3	71600000	4	0	0	0	0	0	0	25900000	5
485	QZT33863.1	alpha/beta fold hydrolase [Caldalkalibacillus thermarum TA2.A1]	1150000	1	9430000	3	27200000	4	18300000	3	7100000	1	5130000	1	0	0	540000	1	0	0	20900000	3	0	0	0	0	1550000	1	0	0	6010000	1	0	0	0	0	0	0	0	0	0	0	24200000	4
486	QZT33599.1	aspartate kinase [Caldalkalibacillus thermarum TA2.A1]	28900000	2	5710000	1	24900000	2	26900000	3	0	0	0	0	0	0	0	0	18100000	3	11700000	1	27300000	3	26900000	3	18400000	3	34900000	5	75000000	6	42200000	5	7980000	1	64600000	2	0	0	0	0	631000000	22
487	QZT35528.1	hypothetical protein HUR95_17075 [Caldalkalibacillus thermarum TA2.A1]	22100000	3	23000000	4	19800000	4	14800000	3	10300000	3	6060000	2	11800000	3	10400000	3	8770000	2	6130000	1	1310000	1	8630000	3	0	0	1240000	1	9060000	3	3180000	1	0	0	0	0	0	0	0	0	17900000	11
488	QZT33152.1	riboflavin synthase [Caldalkalibacillus thermarum TA2.A1]	115000000	2	156000000	3	203000000	3	176000000	3	200000000	4	203000000	4	126000000	3	73200000	3	143000000	3	86700000	3	88500000	5	122000000	7	199000000	7	197000000	7	213000000	8	153000000	7	0	0	0	0	3340000	1	71700000	3	469000000	9
489	QZT34871.1	TRAP transporter substrate-binding protein [Caldalkalibacillus thermarum TA2.A1]	26100000	2	0	0	22100000	1	19600000	1	0	0	0	0	1600000	1	9130000	1	62900000	2	2090000	1	0	0	0	0	0	0	0	0	99400000	5	71700000	4	41800000	3	60100000	2	0	0	46500000	1	77400000	8
490	QZT34880.1	hypothetical protein HUR95_06410 [Caldalkalibacillus thermarum TA2.A1]	9590000	2	0	0	10900000	2	11800000	2	11800000	2	4760000	1	8890000	2	0	0	14000000	2	14500000	2	16200000	1	20800000	2	18500000	3	14600000	2	31500000	3	26000000	5	0	0	0	0	0	0	0	0	375000	1
491	QZT32754.1	hypothetical protein HUR95_10200 [Caldalkalibacillus thermarum TA2.A1]	7100000	1	0	0	5360000	1	4490000	1	5220000	1	1620000	1	5690000	1	5120000	1	5210000	1	0	0	0	0	0	0	0	0	0	0	0	0	0	0	0	0	0	0	0	0	0	0	22000000	3
492	QZT34842.1	histidine kinase [Caldalkalibacillus thermarum TA2.A1]	8490000	2	5280000	2	9090000	2	2230000	1	0	0	1040000	1	6410000	1	1570000	1	5330000	1	6360000	2	2510000	1	2310000	1	2590000	2	7090000	2	10100000	3	1470000	1	0	0	0	0	0	0	0	0	0	0
493	QZT34979.1	50S ribosomal protein L20 [Caldalkalibacillus thermarum TA2.A1]	7800000	2	30900000	4	1610000	1	0	0	11100000	3	10500000	3	0	0	0	0	2990000	1	0	0	90900000	4	75400000	5	149000000	5	134000000	4	62000000	2	98800000	3	0	0	289000000	2	0	0	0	0	42800000	5
494	QZT33111.1	UDP-N-acetylmuramate dehydrogenase [Caldalkalibacillus thermarum TA2.A1]	15400000	2	15800000	3	6790000	1	6280000	1	7820000	2	0	0	4400000	2	3760000	1	10500000	2	5120000	1	9780000	1	0	0	2490000	1	0	1	7620000	2	6930000	3	0	0	0	0	0	0	0	0	18700000	9
495	QZT35065.1	DUF1446 domain-containing protein [Caldalkalibacillus thermarum TA2.A1]	0	2	1620000	2	2650000	1	7320000	3	2930000	1	2050000	2	5120000	2	1570000	1	2380000	2	0	0	918000	1	0	0	7810000	2	2570000	1	6160000	2	4200000	3	0	0	0	0	58900	1	0	0	5120000	5
496	QZT33425.1	Na+/H+ antiporter subunit D [Caldalkalibacillus thermarum TA2.A1]	30200000	1	0	0	0	0	0	0	0	0	0	0	0	0	0	0	0	0	0	0	0	0	0	0	0	0	0	0	0	0	0	0	0	0	0	0	0	0	0	0	0	0
497	QZT34554.1	type II toxin-antitoxin system PemK/MazF family toxin [Caldalkalibacillus thermarum TA2.A1]	28600000	1	1560000	1	32200000	2	28100000	2	4100000	1	23500000	1	8570000	2	3350000	1	21300000	2	40100000	2	83300000	2	60900000	1	3200000	1	79000000	4	98200000	4	67000000	3	27200000	2	0	1	0	0	11300000	1	69800000	7
498	QZT32730.1	cytochrome b6 [Caldalkalibacillus thermarum TA2.A1]	21100000	2	133000000	2	35900000	1	38500000	2	40700000	2	40500000	2	109000000	1	125000000	2	101000000	2	88400000	3	0	0	0	0	0	0	0	0	3330000	1	0	0	0	0	0	0	13300000	1	0	0	91600000	5
499	QZT33112.1	undecaprenyldiphospho-muramoylpentapeptide beta-N-acetylglucosaminyltransferase [Caldalkalibacillus thermarum TA2.A1]	155000000	3	161000000	5	155000000	2	140000000	4	84900000	4	65300000	4	108000000	3	70700000	2	144000000	4	142000000	5	3400000	1	0	0	54900000	7	25300000	3	106000000	7	130000000	9	0	0	0	0	0	0	28800000	2	4180000	4
500	QZT34155.1	NADH-quinone oxidoreductase subunit M [Caldalkalibacillus thermarum TA2.A1]	72200000	2	64400000	2	125000000	1	120000000	1	129000000	2	114000000	1	97900000	2	45300000	1	19000000	1	41200000	2	0	0	0	0	0	0	0	0	0	0	0	0	0	0	0	0	0	0	1800000	1	2340000	2
501	QZT34864.1	ABC transporter ATP-binding protein [Caldalkalibacillus thermarum TA2.A1]	17800000	3	37700000	4	8850000	2	2100000	2	14200000	1	11200000	1	36200000	2	24200000	2	36100000	2	33000000	1	0	0	1040000	1	0	0	0	0	6570000	1	4890000	1	0	0	0	0	0	0	0	0	0	0
502	QZT34428.1	50S ribosomal protein L29 [Caldalkalibacillus thermarum TA2.A1]	75000000	1	66100000	1	40600000	1	28400000	1	22300000	1	0	0	22200000	1	11600000	1	28300000	1	28000000	1	108000000	1	88600000	1	180000000	3	94000000	1	256000000	3	214000000	3	0	0	0	0	0	0	0	0	256000000	4
503	QZT32761.1	malate synthase A [Caldalkalibacillus thermarum TA2.A1]	23300000	2	6830000	2	35700000	5	32300000	4	13100000	2	4750000	1	20900000	3	9850000	2	15400000	4	0	0	17300000	1	14300000	1	23300000	2	4020000	3	61400000	8	52500000	7	0	0	29300000	2	0	0	4370000	2	2050000000	43
504	QZT34388.1	UvrB/UvrC motif-containing protein [Caldalkalibacillus thermarum TA2.A1]	37600000	2	17900000	2	5350000	1	37100000	2	11500000	1	13400000	1	32700000	3	11700000	2	0	0	17700000	2	793000000	3	857000000	3	833000000	4	819000000	4	701000000	7	555000000	6	12800000	1	1150000000	3	9870000	2	17600000	1	186000000	9
505	QZT34844.1	M3 family oligoendopeptidase [Caldalkalibacillus thermarum TA2.A1]	1690000	1	1400000	1	1480000	1	1080000	1	0	0	783000	1	1330000	1	1200000	1	2940000	2	8100000	2	0	0	0	0	0	0	0	0	11900000	3	0	0	0	0	0	0	0	0	0	0	71100000	21
506	QZT34659.1	amino acid ABC transporter ATP-binding protein [Caldalkalibacillus thermarum TA2.A1]	5880000	2	4800000	2	3180000	2	2760000	2	4460000	1	3700000	1	4540000	2	3090000	2	2540000	1	0	0	0	0	0	0	0	0	0	0	0	0	0	0	0	0	0	0	0	0	0	0	113000	1
507	QZT32803.1	ribosome small subunit-dependent GTPase A [Caldalkalibacillus thermarum TA2.A1]	12500000	1	4320000	1	14100000	1	10400000	2	947000	1	839000	1	8790000	2	6630000	2	5100000	1	0	0	4130000	1	0	0	10500000	2	0	0	2950000	1	1270000	1	0	0	0	0	0	0	0	0	2810000	2
508	QZT34081.1	MMPL family transporter [Caldalkalibacillus thermarum TA2.A1]	3750000	1	3760000	2	0	0	0	0	1180000	1	0	0	0	0	6630000	1	2350000	1	0	0	0	0	0	0	0	0	0	0	75400000	6	54500000	6	0	0	0	0	0	0	0	0	3490000	4
509	QZT32889.1	thiol peroxidase [Caldalkalibacillus thermarum TA2.A1]	4330000	1	0	0	6140000	1	3820000	1	4920000	1	2070000	1	5620000	1	3560000	1	10300000	2	0	0	0	1	0	0	0	0	0	1	0	0	0	0	0	0	0	0	0	0	0	0	161000000	6
510	QZT32655.1	bifunctional methylenetetrahydrofolate dehydrogenase/methenyltetrahydrofolate cyclohydrolase FolD [Caldalkalibacillus thermarum TA2.A1]	2930000	2	3160000	1	18100000	2	12000000	1	6620000	1	0	0	3340000	2	23900000	3	24800000	2	6890000	1	12500000	1	10600000	1	41700000	4	31100000	4	58100000	3	20200000	3	0	0	0	0	0	0	0	0	90600000	9
511	QZT35265.1	AbrB/MazE/SpoVT family DNA-binding domain-containing protein [Caldalkalibacillus thermarum TA2.A1]	5940000	2	1860000	1	1980000	1	0	0	9410000	2	3860000	1	2790000	1	2560000	1	0	0	8570000	2	24300000	2	1650000	1	1590000	1	1280000	1	76700000	1	101000000	3	0	0	157000000	3	4600000	1	27800000	1	919000000	10
512	QZT34266.1	30S ribosomal protein S6 [Caldalkalibacillus thermarum TA2.A1]	142000000	2	163000000	2	2360000	1	7900000	1	90400000	2	85400000	2	66600000	1	65800000	2	50300000	1	34700000	1	70000000	2	53000000	2	128000000	3	123000000	3	159000000	3	109000000	3	530000000	3	0	0	113000000	2	217000000	1	474000000	8
513	QZT32741.1	pantoate--beta-alanine ligase [Caldalkalibacillus thermarum TA2.A1]	9880000	2	5630000	1	14600000	1	13400000	1	0	0	0	0	11500000	2	9930000	2	11000000	1	3510000	1	0	0	0	1	389000	1	0	0	9630000	1	8110000	1	0	0	0	0	0	0	0	0	151000000	11
514	QZT35145.1	multicopper oxidase family protein [Caldalkalibacillus thermarum TA2.A1]	83900000	1	0	0	0	0	0	1	0	0	1810000	1	0	0	0	0	0	0	8160000	1	0	0	0	0	5260000	1	0	0	25800000	1	22300000	1	0	0	0	0	1930000	1	17900000	1	7230000	6
515	QZT35048.1	multicopper oxidase family protein [Caldalkalibacillus thermarum TA2.A1]	83900000	1	63900000	2	131000000	2	18400000	1	0	0	1810000	1	0	0	0	0	145000000	2	16900000	1	0	0	2460000	1	9830000	3	0	1	3210000	1	2500000	1	0	0	0	0	0	0	17900000	1	3840000	3
516	QZT34299.1	DNA polymerase III subunit beta [Caldalkalibacillus thermarum TA2.A1]	18200000	3	20000000	4	24700000	4	22200000	5	6020000	2	9050000	4	20300000	4	10000000	3	5780000	4	2390000	1	0	0	7390000	1	41000000	7	37500000	4	49900000	6	47600000	5	0	0	3110000	1	0	0	0	0	272000000	16
517	QZT33204.1	metal-sulfur cluster assembly factor [Caldalkalibacillus thermarum TA2.A1]	17900000	1	15200000	1	19200000	1	16300000	1	0	0	0	0	14500000	1	8940000	1	8850000	1	5680000	1	0	0	0	0	0	0	0	0	0	0	0	0	0	0	0	0	0	0	0	0	0	0
518	QZT34036.1	polysaccharide pyruvyl transferase CsaB [Caldalkalibacillus thermarum TA2.A1]	11400000	2	0	0	19100000	2	14400000	2	0	1	9160000	2	13100000	2	11800000	2	10600000	1	0	0	0	0	0	0	9140000	2	7870000	2	17900000	2	15800000	3	0	0	0	0	0	0	0	0	0	0
519	QZT35346.1	translation initiation factor IF-3 [Caldalkalibacillus thermarum TA2.A1]	23400000	1	26000000	2	41700000	1	41300000	2	14700000	1	16400000	1	20200000	1	15400000	1	92800000	1	86600000	1	142000000	4	367000000	4	336000000	3	386000000	4	439000000	5	409000000	5	0	0	333000000	4	37400000	1	145000000	4	195000000	8
520	QZT35154.1	MFS transporter [Caldalkalibacillus thermarum TA2.A1]	0	1	0	0	0	1	0	1	0	0	0	0	0	0	0	0	0	0	0	0	0	0	0	0	0	0	0	0	0	0	0	0	0	0	0	0	0	0	0	0	0	0
521	QZT33057.1	MFS transporter [Caldalkalibacillus thermarum TA2.A1]	0	1	2170000	1	0	1	0	1	792000	1	714000	1	0	0	0	0	0	0	0	0	0	0	0	0	0	0	0	0	0	0	0	0	705000	1	0	0	0	0	0	0	0	0
522	QZT32523.1	RsmB/NOP family class I SAM-dependent RNA methyltransferase [Caldalkalibacillus thermarum TA2.A1]	2950000	1	2120000	1	1860000	1	1580000	1	0	0	1670000	1	2020000	1	1820000	1	0	0	0	0	0	0	0	0	427000	1	0	0	4120000	1	4060000	1	0	0	0	0	0	0	0	0	13500000	7
523	QZT32575.1	peroxiredoxin [Caldalkalibacillus thermarum TA2.A1]	9430000	2	0	0	11700000	2	7500000	1	8210000	2	0	0	3900000	2	0	0	16300000	1	13500000	1	40400000	2	10500000	1	16000000	2	16900000	3	8080000	2	5770000	3	0	0	0	0	0	0	0	0	5880000000	22
524	QZT32950.1	glycine C-acetyltransferase [Caldalkalibacillus thermarum TA2.A1]	6530000	2	8300000	2	27900000	2	5060000	1	8220000	2	6620000	2	15400000	2	4950000	3	20100000	2	36200000	4	17000000	2	11900000	3	16400000	3	13100000	4	28800000	5	33200000	5	0	0	989000	1	0	0	0	0	92500000	13
525	QZT33003.1	chemotaxis protein CheA [Caldalkalibacillus thermarum TA2.A1]	10900000	2	18800000	4	11800000	2	9570000	2	16300000	3	13600000	5	20000000	5	10500000	3	10500000	4	11500000	3	1950000	1	4560000	2	49500000	8	34700000	6	29400000	6	35900000	6	0	0	0	0	0	0	0	0	1770000	4
526	QZT34896.1	hemolysin family protein [Caldalkalibacillus thermarum TA2.A1]	1010000	1	1070000	1	712000	1	391000	1	0	0	0	0	684000	1	459000	1	0	0	0	0	0	0	0	0	0	0	0	0	7200000	1	0	0	0	0	0	0	0	0	0	0	0	0
527	QZT34421.1	50S ribosomal protein L4 [Caldalkalibacillus thermarum TA2.A1]	286000000	1	103000000	1	211000000	1	189000000	1	127000000	3	113000000	3	158000000	1	155000000	2	259000000	1	279000000	3	311000000	4	296000000	3	368000000	3	204000000	5	620000000	3	615000000	4	197000000	2	215000000	2	70300000	2	39700000	1	179000000	5
528	QZT35008.1	LL-diaminopimelate aminotransferase [Caldalkalibacillus thermarum TA2.A1]	4770000	1	4800000	1	5680000	1	4340000	1	3520000	1	1510000	1	3870000	1	2220000	1	4130000	1	1960000	1	0	0	0	0	0	0	0	0	0	0	0	0	0	0	0	0	0	0	0	0	114000000	13
529	QZT34489.1	phenylacetate-CoA oxygenase subunit PaaC [Caldalkalibacillus thermarum TA2.A1]	1530000	2	0	0	0	0	0	1	6840000	2	0	0	0	0	632000	1	0	1	0	0	0	0	0	0	0	0	0	0	4190000	2	0	1	0	0	0	0	0	0	0	0	3100000	3
530	QZT33642.1	cadmium-translocating P-type ATPase [Caldalkalibacillus thermarum TA2.A1]	5260000	1	4780000	1	4860000	1	4220000	1	870000	2	1130000	1	3120000	1	3760000	2	3790000	1	3230000	1	7470000	1	5780000	2	3240000	2	4580000	3	0	1	1900000	1	0	0	8730000	2	0	0	609000	2	207000000	27
531	QZT34028.1	sensor histidine kinase [Caldalkalibacillus thermarum TA2.A1]	4770000	2	3120000	1	0	0	231000	1	2370000	2	1090000	1	0	0	1750000	1	0	0	2450000	1	0	0	0	0	0	0	2260000	1	1100000	1	0	0	0	0	0	0	0	0	0	0	1290000	3
532	QZT34841.1	LytTR family DNA-binding domain-containing protein [Caldalkalibacillus thermarum TA2.A1]	9530000	2	1740000	2	1160000	1	2340000	2	0	0	0	0	4000000	1	1310000	3	0	0	463000	1	0	0	0	0	7420000	1	375000	1	0	1	225000	1	0	0	0	0	0	0	0	0	175000	1
533	QZT32856.1	o-succinylbenzoate--CoA ligase [Caldalkalibacillus thermarum TA2.A1]	4790000	1	3190000	1	6730000	1	5240000	1	0	0	0	0	3160000	1	3440000	1	0	0	0	0	0	0	0	0	2500000	2	1950000	1	4250000	3	18100000	3	0	0	0	0	0	0	0	0	10300000	9
534	QZT33537.1	ribosome biogenesis GTP-binding protein YihA/YsxC [Caldalkalibacillus thermarum TA2.A1]	5770000	2	9360000	2	16400000	1	16000000	2	7010000	1	3520000	1	0	0	2930000	2	11500000	3	6680000	2	6270000	2	13300000	2	11500000	2	12500000	3	15400000	5	14000000	4	0	0	0	0	0	0	0	0	17200000	6
535	QZT33415.1	ribosome silencing factor [Caldalkalibacillus thermarum TA2.A1]	3820000	1	3080000	1	0	1	1310000	1	7490000	2	1750000	1	0	0	0	1	0	0	0	0	91700000	4	82500000	3	24300000	3	51600000	4	30200000	3	6270000	2	37600000	1	0	0	0	0	0	0	94200000	8
536	QZT33139.1	DUF2129 domain-containing protein [Caldalkalibacillus thermarum TA2.A1]	31400000	2	26400000	2	19100000	3	29400000	4	12900000	2	0	0	5450000	1	14300000	1	49800000	2	20400000	2	0	0	0	0	0	0	0	0	0	0	0	0	5840000	2	15100000	1	0	0	3170000	1	935000	3
537	QZT33017.1	hypothetical protein HUR95_11840 [Caldalkalibacillus thermarum TA2.A1]	7660000	1	3390000	1	1670000	1	0	0	0	0	0	0	0	0	0	0	0	0	0	0	20000000	3	15900000	3	45000000	4	44300000	4	49600000	4	50400000	5	14500000	1	6990000	1	0	0	0	0	0	0
538	QZT32525.1	NAD-dependent deacylase [Caldalkalibacillus thermarum TA2.A1]	4210000	1	3420000	1	0	0	0	0	5720000	1	7160000	2	3140000	1	2080000	1	1690000	1	0	0	0	0	0	0	0	0	3740000	1	7070000	2	18200000	3	0	0	8190000	1	0	0	5960000	1	87800000	11
539	QZT34860.1	ABC transporter permease [Caldalkalibacillus thermarum TA2.A1]	248000000	1	216000000	1	146000000	1	130000000	1	245000000	1	197000000	1	148000000	1	144000000	1	119000000	1	111000000	1	16000000	1	36400000	2	42300000	2	23000000	1	221000000	2	150000000	2	7780000	1	0	0	22100000	1	0	0	18400000	3
540	QZT34417.1	30S ribosomal protein S7 [Caldalkalibacillus thermarum TA2.A1]	9810000	1	39700000	2	4910000	2	0	0	69200000	5	75700000	4	1780000	1	1920000	1	2620000	1	0	0	777000000	5	857000000	7	1210000000	9	1090000000	8	1280000000	8	957000000	7	0	0	239000000	3	0	0	59000000	2	357000000	10
541	QZT34618.1	phosphoribosylglycinamide formyltransferase [Caldalkalibacillus thermarum TA2.A1]	26200000	1	21500000	1	31600000	1	33600000	1	13200000	2	11400000	1	21700000	1	0	0	2610000	1	20600000	1	0	0	27600000	2	13000000	3	8210000	1	17100000	2	0	1	0	0	0	0	0	0	0	0	37500000	6
542	QZT34382.1	cysteine desulfurase [Caldalkalibacillus thermarum TA2.A1]	0	1	5570000	1	0	1	4470000	1	2140000	1	1930000	1	4980000	1	3620000	1	15400000	2	0	0	3410000	1	6170000	2	7890000	2	9220000	4	27300000	5	3940000	1	0	0	0	0	0	0	0	0	0	0
543	QZT34267.1	CoA-transferase [Caldalkalibacillus thermarum TA2.A1]	13100000	2	1300000	1	14600000	3	6890000	1	10400000	2	5100000	1	2500000	1	3470000	1	15300000	3	2360000	2	1520000	1	12700000	2	29500000	3	25800000	2	14100000	4	18400000	4	0	0	0	0	0	0	3240000	1	4600000	7
544	QZT33095.1	DivIVA domain-containing protein [Caldalkalibacillus thermarum TA2.A1]	4580000	1	3870000	1	2100000	1	1830000	1	3410000	1	0	0	2190000	1	1750000	1	0	0	0	0	77700000	3	71500000	4	57400000	4	53000000	3	97700000	5	54300000	4	0	0	225000000	7	0	0	0	0	122000000	10
545	QZT34925.1	sensor domain-containing diguanylate cyclase [Caldalkalibacillus thermarum TA2.A1]	53800000	2	84400000	3	40500000	4	65500000	2	65000000	3	15400000	2	79800000	5	62800000	4	29300000	1	43200000	2	13600000	2	8780000	1	59500000	6	22900000	2	31400000	3	44900000	4	0	1	0	0	23300000	1	43300000	4	1720000	2
546	QZT33844.1	S9 family peptidase [Caldalkalibacillus thermarum TA2.A1]	7360000	1	6640000	1	13800000	2	11600000	2	0	0	0	0	0	0	0	0	12200000	3	12400000	2	0	0	17600000	3	2490000	1	1730000	1	8980000	2	1690000	2	0	0	0	0	0	0	0	0	302000	1
547	QZT33900.1	prolipoprotein diacylglyceryl transferase [Caldalkalibacillus thermarum TA2.A1]	10700000	1	9790000	1	68600000	2	63200000	2	389000	1	0	0	0	0	4950000	1	14000000	1	19500000	1	0	0	0	0	0	0	0	0	29900000	3	23700000	3	0	0	0	0	0	0	0	0	11600000	5
548	QZT34910.1	CBS domain-containing protein [Caldalkalibacillus thermarum TA2.A1]	61600000	2	0	0	39600000	1	1600000	1	0	0	788000	1	30500000	1	26100000	1	43900000	5	16200000	2	12400000	3	30700000	7	53200000	4	50900000	6	105000000	10	118000000	9	1810000	1	8650000	2	0	0	22900000	4	93600000	15
549	QZT33806.1	sodium/proline symporter PutP [Caldalkalibacillus thermarum TA2.A1]	1350000	1	0	0	0	0	0	0	0	0	0	0	0	0	0	0	0	0	0	0	0	0	0	0	0	0	0	0	0	0	0	0	0	0	0	0	0	0	0	0	1460000	1
550	QZT32669.1	sigma 54-interacting transcriptional regulator [Caldalkalibacillus thermarum TA2.A1]	8090000	2	6780000	2	2290000	1	6900000	2	994000	1	0	0	3200000	2	901000	1	14500000	2	6930000	2	10100000	2	0	1	3410000	1	2580000	1	9560000	2	1310000	1	0	0	0	0	0	0	0	0	13100000	13
551	QZT35510.1	U32 family peptidase [Caldalkalibacillus thermarum TA2.A1]	5820000	1	0	0	6980000	1	6450000	1	0	0	0	0	0	0	0	0	0	1	5210000	1	4030000	1	0	0	2980000	1	0	0	0	0	0	0	0	0	0	0	0	0	0	0	85600000	10
552	QZT34917.1	ABC transporter permease subunit [Caldalkalibacillus thermarum TA2.A1]	7250000	1	4970000	1	4020000	1	840000	1	2550000	1	1520000	1	3970000	1	3200000	1	0	0	0	0	0	0	0	0	0	0	0	0	17100000	2	14000000	2	0	0	0	0	0	0	0	0	1150000	2
553	QZT34893.1	XRE family transcriptional regulator [Caldalkalibacillus thermarum TA2.A1]	16700000	1	15000000	1	14100000	2	9720000	1	12600000	2	12700000	2	11900000	2	8460000	2	1580000	2	2950000	1	3560000	1	0	0	5690000	2	10100000	3	7420000	2	0	0	0	0	0	0	0	0	0	0	0	0
554	QZT32891.1	YdiU family protein [Caldalkalibacillus thermarum TA2.A1]	21400000	2	19100000	2	26000000	2	22300000	2	2560000	1	1960000	1	20100000	3	17700000	3	21700000	3	20900000	2	6250000	1	4630000	1	20400000	6	11900000	3	10300000	4	10500000	5	1050000	1	0	0	0	0	0	0	396000	3
555	QZT34991.1	phenylalanine--tRNA ligase subunit alpha [Caldalkalibacillus thermarum TA2.A1]	12600000	1	23100000	2	16100000	2	12300000	3	10700000	2	5100000	1	18000000	3	15800000	3	6350000	2	0	0	19100000	2	17000000	3	26500000	2	15900000	2	26500000	2	28000000	3	0	0	17000000	2	0	0	6650000	1	230000000	19
556	QZT34958.1	transcriptional regulator NrdR [Caldalkalibacillus thermarum TA2.A1]	43300000	2	4660000	1	0	0	23400000	1	120000000	2	124000000	2	0	0	0	0	15000000	1	35300000	1	0	1	20800000	2	274000000	4	223000000	5	401000000	6	267000000	5	131000000	1	128000000	3	0	0	0	0	29200000	10
557	QZT34407.1	transcription termination/antitermination protein NusG [Caldalkalibacillus thermarum TA2.A1]	8890000	1	5300000	1	21300000	1	25300000	2	8390000	1	14100000	2	5520000	1	8240000	2	0	0	5710000	1	165000000	5	174000000	5	124000000	6	119000000	4	205000000	6	60500000	3	2550000	1	71000000	3	0	0	25700000	1	198000000	10
558	QZT34019.1	helix-turn-helix domain-containing protein [Caldalkalibacillus thermarum TA2.A1]	2230000	1	0	0	0	0	0	0	0	0	0	0	0	0	0	0	0	0	0	0	0	0	0	0	0	0	0	0	0	0	0	0	0	0	0	0	0	0	0	0	75500000	8
559	QZT34515.1	hypothetical protein HUR95_03830 [Caldalkalibacillus thermarum TA2.A1]	13500000	1	6580000	1	0	1	5830000	1	0	0	2320000	1	3170000	1	2280000	1	1890000	1	0	0	0	0	0	0	0	0	0	0	0	0	0	0	0	0	0	0	0	0	0	0	0	0
560	QZT34974.1	3-isopropylmalate dehydratase large subunit [Caldalkalibacillus thermarum TA2.A1]	12200000	2	0	0	0	0	966000	1	14200000	2	9780000	1	0	0	0	0	0	0	0	0	1200000	1	0	0	10300000	3	5120000	2	15800000	3	21100000	4	0	0	0	0	0	0	0	0	368000000	18
561	QZT34430.1	50S ribosomal protein L14 [Caldalkalibacillus thermarum TA2.A1]	167000000	1	207000000	3	112000000	1	145000000	3	137000000	1	179000000	3	128000000	2	92000000	2	30200000	1	114000000	3	91300000	4	170000000	6	114000000	4	290000000	4	232000000	4	194000000	6	27800000	1	372000000	3	0	0	52500000	2	86100000	5
562	QZT33396.1	16S rRNA (uracil(1498)-N(3))-methyltransferase [Caldalkalibacillus thermarum TA2.A1]	9970000	1	9820000	1	3150000	1	0	0	8350000	1	7280000	1	0	0	0	0	4260000	1	0	0	2630000	1	1090000	1	2590000	1	9850000	1	2740000	2	4650000	2	0	0	0	0	0	0	0	0	5500000	5
563	QZT32994.1	UMP kinase [Caldalkalibacillus thermarum TA2.A1]	11700000	2	32000000	3	22700000	2	8100000	1	6020000	2	7040000	2	27200000	5	10900000	2	25200000	3	2890000	1	60700000	5	28600000	5	12500000	3	30200000	4	71700000	5	53800000	6	5080000	1	15900000	1	0	0	0	0	59200000	10
564	QZT34895.1	formate--tetrahydrofolate ligase [Caldalkalibacillus thermarum TA2.A1]	10300000	2	0	0	0	0	0	0	2410000	1	2440000	1	0	0	2460000	1	0	0	0	0	13100000	2	16100000	4	11400000	2	7990000	1	8520000	3	0	0	0	0	10500000	2	0	0	0	0	6500000	5
565	QZT35470.1	helix-turn-helix transcriptional regulator [Caldalkalibacillus thermarum TA2.A1]	3530000	1	3050000	1	1930000	1	1620000	1	0	0	0	0	2130000	1	1990000	1	0	0	0	0	0	0	0	0	4070000	2	10700000	2	11600000	1	699000	1	0	0	0	0	0	0	0	0	52400000	7
566	QZT34922.1	glycine betaine/L-proline ABC transporter ATP-binding protein [Caldalkalibacillus thermarum TA2.A1]	7430000	1	6440000	1	6720000	1	5840000	1	4180000	1	0	0	5040000	1	4410000	1	3830000	1	3510000	1	13800000	4	1010000	1	8790000	3	7340000	3	8430000	4	9550000	3	0	0	0	0	0	0	1650000	1	4690000	7
567	QZT33114.1	UDP-N-acetylmuramoyl-L-alanine--D-glutamate ligase [Caldalkalibacillus thermarum TA2.A1]	2280000	2	0	0	12000000	2	12400000	3	744000	1	2070000	2	0	0	2150000	3	3430000	2	464000	1	10200000	2	9330000	2	0	0	2750000	1	1270000	1	5820000	2	0	0	0	0	0	0	0	0	16000000	11
568	QZT34249.1	23S rRNA (pseudouridine(1915)-N(3))-methyltransferase RlmH [Caldalkalibacillus thermarum TA2.A1]	5100000	2	4330000	1	7670000	2	6510000	2	0	0	2040000	1	2860000	1	3850000	2	11700000	1	3520000	1	18100000	1	16300000	1	13400000	1	18500000	1	25100000	2	16000000	2	0	0	0	0	14600000	1	4860000	1	23900000	6
569	QZT33397.1	50S ribosomal protein L11 methyltransferase [Caldalkalibacillus thermarum TA2.A1]	11000000	1	6170000	1	4880000	1	3830000	1	8660000	2	5930000	2	7940000	2	4120000	1	0	0	0	0	4710000	1	3850000	1	0	0	5910000	1	0	0	8960000	2	0	0	0	0	0	0	9360000	1	39500000	9
570	QZT33153.1	bifunctional diaminohydroxyphosphoribosylaminopyrimidine deaminase/5-amino-6-(5-phosphoribosylamino)uracil reductase RibD [Caldalkalibacillus thermarum TA2.A1]	1240000	1	0	0	0	0	5780000	2	3510000	2	1960000	1	3790000	2	3060000	1	0	0	2820000	1	484000	1	1730000	1	9530000	4	7960000	3	18800000	5	5270000	3	0	0	0	0	0	0	0	0	236000000	19
571	QZT34334.1	tRNA1(Val) (adenine(37)-N6)-methyltransferase [Caldalkalibacillus thermarum TA2.A1]	22700000	1	9380000	1	0	0	0	0	11200000	1	4080000	1	0	0	3020000	2	0	1	7340000	1	11600000	1	14500000	2	31200000	3	38100000	5	39200000	4	7900000	2	0	0	0	0	0	0	4270000	1	21300000	9
572	QZT33827.1	hypothetical protein HUR95_16735 [Caldalkalibacillus thermarum TA2.A1]	25700000	2	24000000	2	36100000	3	24900000	2	6150000	1	6680000	2	0	1	1410000	1	20200000	2	10000000	2	58300000	2	34200000	2	30200000	1	16800000	1	93200000	3	29600000	1	4780000	1	18100000	1	0	0	31900000	1	526000000	14
573	QZT32807.1	DAK2 domain-containing protein [Caldalkalibacillus thermarum TA2.A1]	4740000	1	6590000	3	0	0	0	0	0	0	341000	1	2280000	1	2340000	1	0	0	12200000	1	27800000	3	27500000	5	49900000	3	67900000	5	78300000	5	65100000	4	0	0	22000000	3	0	0	0	0	31200000	10
574	QZT33347.1	esterase family protein [Caldalkalibacillus thermarum TA2.A1]	12200000	1	14300000	2	14800000	2	11300000	1	0	0	0	0	0	0	0	0	9250000	1	0	0	0	0	0	0	0	0	2680000	1	10500000	2	5810000	1	0	0	5680000	1	0	0	0	0	101000000	9
575	QZT35281.1	enoyl-CoA hydratase/isomerase family protein [Caldalkalibacillus thermarum TA2.A1]	355000	1	0	0	0	0	0	0	0	0	1500000	1	0	0	0	1	0	0	0	0	2060000	1	1480000	1	9270000	2	8790000	3	4150000	1	0	0	0	0	0	0	0	0	3190000	1	47600000	5
576	QZT34239.1	isocitrate lyase [Caldalkalibacillus thermarum TA2.A1]	8440000	1	7970000	1	1020000	1	1960000	2	289000	2	2490000	2	10500000	2	8620000	3	13000000	1	13900000	2	24800000	2	21800000	1	41200000	5	44100000	4	36400000	5	28100000	4	0	0	0	0	0	0	0	0	268000000	22
577	QZT35159.1	exonuclease SbcCD subunit D [Caldalkalibacillus thermarum TA2.A1]	18800000	2	4830000	1	17300000	1	2880000	1	7890000	2	5110000	2	3600000	1	2450000	1	14400000	2	10500000	1	0	0	0	0	19500000	4	28300000	4	49500000	4	17900000	4	0	0	0	0	0	0	6760000	1	53600000	15
578	QZT32993.1	ribosome recycling factor [Caldalkalibacillus thermarum TA2.A1]	4360000	1	0	0	4770000	1	4160000	1	5750000	1	0	0	6110000	2	5870000	2	2250000	1	0	0	0	1	304000	1	964000	1	1060000	1	9690000	2	2180000	1	0	0	0	0	0	0	0	0	677000000	16
579	QZT34634.1	amidohydrolase family protein [Caldalkalibacillus thermarum TA2.A1]	7770000	3	1360000	1	4210000	2	8320000	3	4420000	2	0	0	1050000	1	2600000	2	6660000	2	0	1	0	0	0	0	270000	1	175000	1	0	1	0	0	0	0	0	0	0	0	0	0	30900000	16
580	QZT35345.1	branched-chain-amino-acid transaminase [Caldalkalibacillus thermarum TA2.A1]	4380000	1	4300000	1	6330000	1	4590000	1	1140000	1	0	0	4770000	1	2550000	1	45000000	2	4390000	1	4860000	1	2570000	1	19200000	3	13700000	3	9670000	2	6340000	2	0	0	0	0	0	0	0	0	2300000000	20
581	QZT32958.1	competence/damage-inducible protein A [Caldalkalibacillus thermarum TA2.A1]	6390000	1	5460000	1	6360000	1	4980000	1	0	0	0	0	0	0	0	0	0	0	5300000	1	2360000	1	956000	1	2030000	1	1690000	1	1710000	1	0	0	0	0	0	0	0	0	0	0	10000000	6
582	QZT32580.1	D-alanine--D-alanine ligase [Caldalkalibacillus thermarum TA2.A1]	8960000	1	7150000	1	19000000	1	18200000	2	0	0	0	0	1750000	1	966000	1	4510000	1	15400000	1	0	0	0	0	2510000	1	0	0	37000000	4	9580000	1	0	0	0	0	0	0	0	0	839000000	28
583	QZT33289.1	metallophosphoesterase [Caldalkalibacillus thermarum TA2.A1]	18600000	1	4610000	1	11300000	1	11700000	2	0	0	0	0	0	0	0	0	0	0	0	0	4470000	1	223000	1	20500000	2	39000000	3	32900000	3	18100000	2	0	0	0	0	0	0	5130000	1	12900000	6
584	QZT34170.1	F0F1 ATP synthase subunit B [Caldalkalibacillus thermarum TA2.A1]	189000000	1	187000000	2	142000000	2	125000000	3	81100000	1	88600000	2	148000000	2	120000000	3	115000000	3	93100000	1	1120000	1	0	0	136000000	2	112000000	3	275000000	3	227000000	3	53300000	1	1100000000	6	0	0	404000000	3	169000000	5
585	QZT33284.1	protease HtpX [Caldalkalibacillus thermarum TA2.A1]	13200000	1	0	1	0	0	6840000	1	11400000	1	11300000	1	0	0	5980000	1	8990000	1	4220000	1	51700000	2	80400000	3	105000000	1	112000000	3	143000000	3	159000000	4	1030000	1	239000000	2	0	0	0	0	25800000	5
586	QZT33534.1	hydroxymethylbilane synthase [Caldalkalibacillus thermarum TA2.A1]	3720000	2	0	0	17300000	2	19000000	2	31100000	2	30000000	2	2280000	1	448000	1	12100000	1	22600000	2	14100000	1	18800000	3	2620000	2	19300000	2	29300000	2	55800000	5	0	0	34300000	2	0	0	812000	1	221000000	15
587	QZT34767.1	tRNA (uridine(34)/cytosine(34)/5-carboxymethylaminomethyluridine(34)-2'-O)-methyltransferase TrmL [Caldalkalibacillus thermarum TA2.A1]	3920000	1	4190000	1	5840000	1	4980000	1	5220000	2	1580000	1	4070000	1	3310000	1	2860000	1	3590000	2	0	0	0	0	0	0	1320000	1	0	0	0	0	0	0	0	0	0	0	0	0	6040000	4
588	QZT32955.1	stage V sporulation protein SpoVS [Caldalkalibacillus thermarum TA2.A1]	1030000	1	77700000	1	74000000	1	14400000	1	57100000	2	52200000	2	66500000	1	1090000	1	54000000	2	55300000	2	68700000	3	69100000	3	21700000	2	49000000	3	178000000	3	150000000	3	0	0	70200000	1	0	0	16700000	1	181000000	4
589	QZT35213.1	EAL domain-containing protein [Caldalkalibacillus thermarum TA2.A1]	5100000	2	0	0	0	0	2460000	1	1640000	1	2730000	2	96700	2	0	0	0	1	0	0	0	0	5670000	2	5030000	2	7030000	3	8120000	3	9840000	3	0	0	0	0	0	0	0	0	0	0
590	QZT34029.1	methionine adenosyltransferase [Caldalkalibacillus thermarum TA2.A1]	37500000	3	2650000	1	31800000	1	28000000	1	31500000	3	41700000	5	23500000	1	33000000	1	46600000	1	6430000	1	166000000	5	255000000	8	169000000	9	157000000	9	163000000	8	123000000	7	8910000	1	41500000	5	77500000	2	0	0	1490000000	23
591	QZT35206.1	AAA family ATPase [Caldalkalibacillus thermarum TA2.A1]	2130000	1	2300000	1	3390000	3	2880000	3	1970000	1	1080000	1	0	0	1800000	2	8680000	2	5770000	1	6740000	2	14000000	5	11200000	2	5610000	5	3370000	4	5650000	4	0	0	0	0	0	0	0	0	0	0
592	QZT34969.1	acetolactate synthase large subunit [Caldalkalibacillus thermarum TA2.A1]	2510000	1	10200000	3	5950000	1	4410000	1	2000000	1	0	0	0	0	0	0	0	0	0	0	4880000	1	11600000	2	0	0	9270000	3	14800000	2	6070000	2	0	0	5170000	1	0	0	2510000	1	591000000	23
593	QZT35363.1	helicase-exonuclease AddAB subunit AddB [Caldalkalibacillus thermarum TA2.A1]	0	1	7370000	2	7280000	3	4860000	3	13100000	4	776000	1	7340000	3	9820000	5	0	1	4490000	2	2700000	2	0	1	4620000	1	12300000	3	10700000	5	4810000	3	716000	1	0	0	0	0	0	0	190000000	50
594	QZT33190.1	molybdenum cofactor guanylyltransferase [Caldalkalibacillus thermarum TA2.A1]	7230000	1	51900000	2	0	0	34700000	3	0	1	16800000	3	14600000	1	16800000	2	31100000	3	15900000	3	94700000	3	92900000	3	24800000	3	52900000	3	173000000	4	120000000	4	0	0	30500000	2	0	0	6370000	1	1290000	2
595	QZT35147.1	TrkA family potassium uptake protein [Caldalkalibacillus thermarum TA2.A1]	7160000	1	5960000	1	8720000	1	42500000	2	0	0	12100000	1	34400000	2	0	0	33400000	1	72700000	2	130000000	5	167000000	7	135000000	7	119000000	7	195000000	8	135000000	8	0	0	22100000	2	0	0	12300000	1	75800000	10
596	QZT32985.1	transcription termination factor NusA [Caldalkalibacillus thermarum TA2.A1]	11900000	2	0	0	0	0	3370000	1	3130000	1	4180000	2	4840000	2	4390000	2	17500000	1	18000000	1	0	0	0	0	0	0	0	1	15000000	1	17300000	3	0	0	0	0	0	0	0	0	80600000	14
597	QZT34027.1	response regulator transcription factor [Caldalkalibacillus thermarum TA2.A1]	11500000	2	5280000	1	3620000	1	3790000	1	8420000	3	6660000	2	2860000	1	2130000	1	0	0	0	0	11500000	2	2520000	2	9340000	1	2220000	1	13000000	2	12800000	3	0	0	0	0	0	0	0	0	153000000	15
598	QZT34942.1	pyruvate kinase [Caldalkalibacillus thermarum TA2.A1]	8130000	2	3510000	1	7980000	2	0	0	9750000	2	0	1	5610000	2	2230000	1	4700000	2	4750000	2	44700000	5	59800000	6	32800000	4	19800000	4	79800000	6	50400000	4	0	0	41000000	4	0	0	0	0	1390000000	43
599	QZT33522.1	pilus assembly PilX N-terminal domain-containing protein [Caldalkalibacillus thermarum TA2.A1]	0	1	751000	2	0	1	0	0	0	0	0	0	0	0	0	0	6900000	1	9440000	1	0	0	0	0	0	0	0	0	17300000	3	15400000	3	0	0	0	0	0	0	0	0	0	0
600	QZT35383.1	polyprenyl synthetase family protein [Caldalkalibacillus thermarum TA2.A1]	4270000	2	5930000	2	13100000	2	10400000	1	3730000	1	0	0	4530000	2	3860000	2	795000	1	0	0	0	0	0	0	6170000	2	0	0	0	0	19300000	4	0	0	0	0	0	0	0	0	57400000	7
601	QZT33087.1	RluA family pseudouridine synthase [Caldalkalibacillus thermarum TA2.A1]	22600000	2	17100000	1	0	0	9430000	1	0	0	0	0	8710000	1	0	0	0	0	0	0	0	0	0	0	0	0	0	0	14900000	1	11200000	1	0	0	0	0	0	0	0	0	908000	1
602	QZT33509.1	septum site-determining protein MinC [Caldalkalibacillus thermarum TA2.A1]	722000	1	27700000	3	3490000	1	3140000	1	5280000	1	0	0	21300000	1	20500000	2	57000000	3	49800000	2	107000000	7	83700000	5	99200000	7	43200000	4	126000000	8	111000000	8	0	0	2520000	1	0	0	2830000	1	674000	2
603	QZT33128.1	acetyl-CoA carboxylase biotin carboxylase subunit [Caldalkalibacillus thermarum TA2.A1]	5320000	1	3560000	1	5720000	1	5430000	1	17400000	3	18600000	3	10800000	2	0	0	11400000	3	3130000	1	3810000	1	3890000	1	14500000	4	25800000	4	20200000	5	37200000	6	0	0	0	0	0	0	0	0	24600000	9
604	QZT34305.1	molybdate ABC transporter substrate-binding protein [Caldalkalibacillus thermarum TA2.A1]	8430000	1	12900000	2	9360000	2	2520000	2	16100000	2	20500000	3	22400000	3	7910000	2	37500000	2	11500000	2	0	0	0	0	0	0	0	0	11700000	2	4930000	1	5780000	1	13700000	1	0	0	0	0	1950000	2
605	QZT34323.1	YbaB/EbfC family nucleoid-associated protein [Caldalkalibacillus thermarum TA2.A1]	1470000	1	0	0	1470000	1	0	0	0	0	0	0	1020000	1	431000	1	841000	1	6330000	1	11200000	1	9090000	1	923000	1	10400000	1	27000000	1	2920000	1	0	0	54400000	2	0	0	0	0	242000000	5
606	QZT33657.1	DUF4365 domain-containing protein [Caldalkalibacillus thermarum TA2.A1]	11100000	1	19100000	2	10400000	1	7650000	1	0	0	0	0	7780000	1	5350000	1	0	0	0	0	13100000	1	11600000	1	0	0	0	0	0	0	0	0	0	0	0	0	0	0	0	0	10800000	7
607	QZT33706.1	hypothetical protein HUR95_16025 [Caldalkalibacillus thermarum TA2.A1]	1680000	1	13000000	2	3540000	1	0	0	1710000	1	0	0	0	0	1680000	1	3000000	2	5520000	2	3150000	1	10900000	2	2330000	2	11400000	3	39200000	6	33200000	5	0	0	0	0	0	0	847000	1	36000000	10
608	QZT33372.1	rRNA maturation RNase YbeY [Caldalkalibacillus thermarum TA2.A1]	7670000	2	6190000	2	1930000	2	1200000	2	2120000	2	4510000	2	2360000	2	1200000	1	2760000	2	1230000	1	25300000	2	23900000	1	0	0	28300000	1	5940000	1	5030000	1	0	0	0	0	0	0	0	0	16600000	2
609	QZT35267.1	RidA family protein [Caldalkalibacillus thermarum TA2.A1]	2440000	1	0	0	0	0	565000	1	0	1	0	0	0	1	1690000	1	0	1	0	0	2010000	1	0	0	4550000	1	0	0	0	0	0	0	0	0	0	0	0	0	0	0	639000000	9
610	QZT33600.1	excinuclease ABC subunit UvrC [Caldalkalibacillus thermarum TA2.A1]	1120000	2	0	0	0	0	0	0	432000	1	335000	1	351000	1	0	0	0	0	0	0	0	0	218000	1	5100000	2	3670000	3	8590000	2	8630000	4	0	0	0	0	0	0	0	0	1200000	2
611	QZT34076.1	LacI family DNA-binding transcriptional regulator [Caldalkalibacillus thermarum TA2.A1]	2270000	1	0	0	0	0	1440000	1	0	0	0	0	0	0	0	0	0	0	0	0	0	0	0	0	0	0	0	0	0	0	0	0	1700000	1	0	0	0	0	0	0	410000000	20
612	QZT35186.1	hypothetical protein HUR95_08260 [Caldalkalibacillus thermarum TA2.A1]	0	1	0	1	0	0	0	0	0	0	2260000	1	0	1	0	0	27700000	1	0	1	0	0	0	0	0	0	0	0	0	0	12700000	1	0	0	0	0	0	0	0	0	0	0
613	QZT35183.1	hypothetical protein HUR95_08240 [Caldalkalibacillus thermarum TA2.A1]	0	1	0	1	0	0	0	0	0	0	2260000	1	0	1	0	0	27700000	1	0	1	0	0	0	0	0	0	0	0	0	0	0	0	0	0	0	0	0	0	0	0	0	0
614	QZT34296.1	ribonuclease P protein component [Caldalkalibacillus thermarum TA2.A1]	15700000	1	12500000	1	11200000	1	11600000	1	10000000	1	628000	1	8820000	1	9000000	1	0	0	0	0	6440000	1	4820000	1	0	0	0	0	0	0	0	0	0	0	0	0	0	0	0	0	2280000	1
615	QZT34322.1	DNA polymerase III subunit gamma/tau [Caldalkalibacillus thermarum TA2.A1]	4650000	1	4950000	1	4850000	1	4050000	1	0	0	0	0	3370000	1	1940000	1	4620000	1	0	0	11600000	2	3490000	1	3220000	1	2660000	1	0	1	934000	1	0	0	0	0	0	0	0	0	6190000	7
616	QZT33883.1	2 3-bisphosphoglycerate-independent phosphoglycerate mutase [Caldalkalibacillus thermarum TA2.A1]	0	1	0	0	4970000	1	5480000	2	1350000	1	1380000	1	2630000	1	2700000	1	17200000	3	8620000	1	2360000	1	2410000	2	8610000	4	5130000	3	8750000	2	7800000	2	0	0	0	0	0	0	0	0	716000000	31
617	QZT33589.1	ABC transporter substrate-binding protein [Caldalkalibacillus thermarum TA2.A1]	13600000	2	1380000	1	0	0	702000	1	0	0	0	0	0	0	0	0	14700000	2	7450000	1	0	0	0	0	0	0	0	0	8550000	2	7250000	2	0	0	0	0	0	0	0	0	624000	1
618	QZT35430.1	IS5 family transposase [Caldalkalibacillus thermarum TA2.A1]	1090000	1	0	0	0	0	0	0	0	0	0	0	0	0	0	0	0	0	0	0	0	0	0	0	0	0	0	0	1520000	1	1370000	1	0	0	0	0	0	0	0	0	0	0
619	QZT35292.1	IS5 family transposase [Caldalkalibacillus thermarum TA2.A1]	1090000	1	0	0	0	0	0	0	0	0	0	0	0	0	0	0	0	0	0	0	0	0	0	0	0	0	0	0	1520000	1	1370000	1	0	0	0	0	0	0	0	0	0	0
620	QZT34111.1	transposase [Caldalkalibacillus thermarum TA2.A1]	1090000	1	0	0	0	0	0	0	0	0	0	0	0	0	0	0	0	0	0	0	0	0	0	0	0	0	0	0	1520000	1	1370000	1	0	0	0	0	0	0	0	0	0	0
621	QZT34768.1	HAD family hydrolase [Caldalkalibacillus thermarum TA2.A1]	7040000	1	0	0	8890000	1	5680000	1	4910000	1	3600000	1	4020000	1	5870000	1	0	0	0	0	10800000	1	7240000	1	6180000	1	0	0	44600000	3	23600000	1	0	0	0	0	0	0	8440000	1	2910000	1
622	QZT32518.1	class I SAM-dependent methyltransferase [Caldalkalibacillus thermarum TA2.A1]	3420000	2	873000	1	0	0	0	0	0	0	0	0	0	0	0	0	0	0	0	0	1140000	1	0	1	6110000	2	1430000	1	3010000	2	1610000	1	0	0	16400000	2	0	0	0	0	7860000	5
623	QZT33526.1	bifunctional folylpolyglutamate synthase/dihydrofolate synthase [Caldalkalibacillus thermarum TA2.A1]	12300000	1	5760000	2	6800000	1	7450000	1	9210000	1	506000	1	630000	1	5790000	2	383000	1	0	2	4790000	2	9020000	3	11700000	3	21200000	4	21700000	6	14400000	5	0	0	0	0	0	0	0	0	179000000	20
624	QZT34441.1	adenylate kinase [Caldalkalibacillus thermarum TA2.A1]	4300000	1	23500000	3	7510000	1	6640000	1	7830000	2	4090000	1	21600000	3	9150000	2	26300000	2	20400000	3	26900000	3	27100000	3	25500000	3	14300000	2	23000000	3	74300000	4	0	0	18700000	3	0	0	0	0	367000000	15
625	QZT34492.1	hypothetical protein HUR95_03680 [Caldalkalibacillus thermarum TA2.A1]	4280000	1	2130000	1	0	0	3440000	1	0	0	0	0	0	0	0	1	12800000	2	0	0	0	0	0	0	0	0	0	0	1750000	1	930000	1	0	0	0	0	0	0	0	0	2520000	4
626	QZT33476.1	bifunctional (p)ppGpp synthetase/guanosine-3' 5'-bis(diphosphate) 3'-pyrophosphohydrolase [Caldalkalibacillus thermarum TA2.A1]	1600000	1	8800000	1	1830000	1	1520000	1	0	0	1620000	1	5870000	1	4800000	1	0	0	7500000	2	7160000	2	15100000	3	26100000	6	37500000	6	16500000	2	20200000	4	0	0	0	0	0	0	0	0	18900000	10
627	QZT33132.1	50S ribosomal protein L32 [Caldalkalibacillus thermarum TA2.A1]	33900000	1	28600000	1	0	0	7870000	1	0	0	25600000	1	0	0	12700000	1	13800000	1	13100000	1	76400000	1	79600000	1	66000000	1	71100000	1	121000000	1	118000000	1	0	0	98200000	1	0	0	0	0	70200000	1
628	QZT34442.1	type I methionyl aminopeptidase [Caldalkalibacillus thermarum TA2.A1]	5160000	1	16100000	3	15800000	3	5610000	2	4010000	2	3770000	2	6500000	1	7410000	2	11600000	2	3330000	2	10700000	1	10900000	2	26700000	4	8190000	2	46000000	5	33600000	3	0	0	0	0	0	0	0	0	43100000	9
629	QZT33135.1	PDZ domain-containing protein [Caldalkalibacillus thermarum TA2.A1]	6220000	2	0	1	3370000	2	9560000	3	3850000	1	0	0	4340000	2	0	0	8510000	2	8880000	3	0	0	8260000	1	0	0	1120000	1	0	1	0	0	0	0	0	0	0	0	1350000	1	0	0
630	QZT34978.1	50S ribosomal protein L35 [Caldalkalibacillus thermarum TA2.A1]	189000000	1	182000000	1	130000000	1	90100000	1	93500000	1	72900000	1	87500000	1	109000000	1	146000000	1	162000000	1	0	0	0	0	54500000	2	0	0	113000000	2	128000000	1	13200000	1	36200000	1	0	0	20000000	1	44300000	2
631	QZT33010.1	flagellar biosynthetic protein FliO [Caldalkalibacillus thermarum TA2.A1]	1710000	1	1590000	1	2550000	1	1920000	1	0	0	0	0	0	0	858000	1	0	0	15300000	2	0	0	0	0	0	0	0	0	0	0	0	0	0	0	0	0	0	0	0	0	0	0
632	QZT33489.1	Holliday junction branch migration DNA helicase RuvB [Caldalkalibacillus thermarum TA2.A1]	11300000	2	12100000	2	9840000	2	10100000	2	0	0	3870000	1	9070000	2	8500000	2	6310000	2	0	0	0	0	13900000	2	11700000	2	7060000	1	20600000	3	11900000	2	0	0	0	0	0	0	0	0	14100000	8
633	QZT33461.1	Holliday junction resolvase RuvX [Caldalkalibacillus thermarum TA2.A1]	1730000	1	0	0	0	0	891000	1	0	0	0	0	0	0	643000	1	0	0	0	0	0	0	0	0	0	0	0	0	0	0	0	0	0	0	0	0	0	0	0	0	10500000	2
634	QZT34920.1	EAL domain-containing protein [Caldalkalibacillus thermarum TA2.A1]	9150000	1	12200000	2	0	1	13700000	1	5110000	1	2040000	1	626000	1	9230000	3	19500000	1	2920000	2	0	0	43900000	1	35100000	1	32900000	1	86100000	4	23300000	1	0	0	0	0	2470000	1	0	0	0	0
635	QZT34426.1	30S ribosomal protein S3 [Caldalkalibacillus thermarum TA2.A1]	368000000	2	334000000	2	242000000	2	328000000	1	366000000	4	314000000	2	189000000	1	191000000	3	309000000	1	280000000	2	1310000000	9	1020000000	9	1590000000	8	1640000000	9	1900000000	10	1590000000	9	110000000	2	884000000	8	27900000	2	486000000	7	626000000	15
636	QZT33544.1	XTP/dITP diphosphatase [Caldalkalibacillus thermarum TA2.A1]	525000	1	0	0	350000	1	0	0	0	0	0	0	0	0	0	0	0	0	0	0	0	0	0	0	0	0	0	0	10100000	1	6560000	1	0	0	0	0	0	0	0	0	113000000	8
637	QZT34269.1	CoA-disulfide reductase [Caldalkalibacillus thermarum TA2.A1]	2280000	2	988000	1	1070000	1	0	0	0	0	0	0	0	0	18300000	2	1260000	1	0	0	1420000	1	1390000	1	1520000	1	0	0	1680000	1	1190000	1	0	0	0	0	0	0	0	0	5790000	4
638	QZT35190.1	DUF2220 domain-containing protein [Caldalkalibacillus thermarum TA2.A1]	19100000	2	5350000	1	10500000	1	0	0	9070000	1	0	0	5870000	1	4450000	1	0	0	0	0	0	0	0	0	0	0	0	1	4840000	2	10700000	1	0	0	0	0	0	0	0	0	0	0
639	QZT35349.1	phosphonate ABC transporter permease protein PhnE [Caldalkalibacillus thermarum TA2.A1]	11900000	1	9760000	1	8410000	1	6990000	1	0	0	2620000	1	0	0	0	0	0	0	4510000	1	0	0	0	0	0	0	0	0	0	0	0	0	0	0	0	0	0	0	0	0	972000	1
640	QZT34086.1	FAD-binding protein [Caldalkalibacillus thermarum TA2.A1]	1910000	1	1360000	1	2450000	1	2590000	1	1850000	1	1670000	1	1560000	1	0	0	2230000	1	0	0	0	0	0	0	0	0	0	0	0	0	0	0	0	0	0	0	0	0	0	0	1110000	2
641	QZT32925.1	GTPase HflX [Caldalkalibacillus thermarum TA2.A1]	5450000	1	2620000	2	4260000	1	4610000	2	6420000	1	4530000	1	2550000	1	2040000	1	4720000	1	0	1	0	0	0	0	3170000	1	2350000	1	6010000	2	3170000	1	0	0	0	0	0	0	0	0	739000	2
642	QZT33014.1	flagellar FlbD family protein [Caldalkalibacillus thermarum TA2.A1]	1390000	1	0	0	2690000	1	0	0	0	0	0	0	0	0	0	0	0	0	0	0	0	0	0	0	0	0	0	0	0	0	0	0	0	0	0	0	0	0	0	0	0	1
643	QZT35105.1	molybdenum cofactor biosynthesis protein MoaB [Caldalkalibacillus thermarum TA2.A1]	2710000	1	2930000	1	2730000	1	1790000	1	21500000	3	25400000	3	410000	1	2020000	1	17100000	2	11700000	1	3180000	2	19000000	5	7840000	1	21500000	3	41500000	4	63500000	4	0	0	0	0	0	0	0	0	381000000	10
644	QZT32979.1	tRNA pseudouridine(55) synthase TruB [Caldalkalibacillus thermarum TA2.A1]	2200000	1	0	0	0	0	2260000	2	1460000	1	833000	1	0	0	0	0	0	0	0	0	635000	1	2140000	1	1050000	2	1190000	1	4140000	2	0	0	0	0	0	0	0	0	0	0	1400000	3
645	QZT35282.1	alpha-ketoacid dehydrogenase subunit beta [Caldalkalibacillus thermarum TA2.A1]	874000	1	738000	1	0	0	0	0	0	0	0	0	0	0	0	0	0	0	0	0	0	0	0	0	0	0	0	0	0	0	0	0	0	0	0	0	0	0	0	0	0	0
646	QZT32641.1	type II 3-dehydroquinate dehydratase [Caldalkalibacillus thermarum TA2.A1]	634000	1	0	0	1540000	1	1380000	1	0	0	0	0	1220000	1	0	1	1480000	1	0	0	0	0	0	0	0	0	0	0	0	0	0	0	0	0	0	0	0	0	0	0	40000000	9
647	QZT35251.1	acyl-CoA dehydrogenase [Caldalkalibacillus thermarum TA2.A1]	13400000	1	12900000	1	20000000	2	21300000	2	3830000	1	1580000	1	16500000	2	21000000	3	309000	1	10600000	1	22200000	3	27400000	2	36900000	5	44800000	7	44400000	5	28600000	4	0	0	2830000	1	0	0	0	0	62100000	15
648	QZT33865.1	preprotein translocase subunit SecG [Caldalkalibacillus thermarum TA2.A1]	9800000	1	8160000	1	0	0	0	0	11600000	1	10300000	1	14700000	1	8140000	1	6160000	1	0	0	3550000	1	0	0	0	0	0	0	6610000	1	0	0	0	0	18300000	1	0	0	0	0	3330000	2
649	QZT34156.1	NADH-quinone oxidoreductase subunit L [Caldalkalibacillus thermarum TA2.A1]	1990000	1	17400000	1	9950000	1	6670000	1	20600000	1	21400000	2	16900000	3	30400000	5	26300000	3	0	0	0	0	0	0	0	0	0	0	5510000	1	0	0	6360000	1	0	0	0	0	0	0	6770000	3
650	QZT32664.1	sporulation transcription factor Spo0A [Caldalkalibacillus thermarum TA2.A1]	4460000	1	0	0	14700000	2	9790000	2	5660000	1	5600000	1	4540000	1	1730000	2	5020000	2	0	0	63600000	2	35700000	2	47100000	5	53400000	3	41800000	2	13600000	2	0	0	0	0	0	0	0	0	889000	1
651	QZT34739.1	CRISPR-associated endoribonuclease Cas6 [Caldalkalibacillus thermarum TA2.A1]	6880000	2	8990000	3	3900000	1	1650000	1	6490000	2	6340000	2	3320000	2	246000	1	42900000	4	52900000	4	31700000	2	31100000	2	42600000	3	40900000	4	83500000	6	22400000	3	0	0	0	0	0	0	0	0	45800000	13
652	QZT33627.1	transposase [Caldalkalibacillus thermarum TA2.A1]	13400000	1	15600000	1	16400000	1	12700000	1	4860000	2	4380000	2	12600000	1	11700000	1	22800000	2	10600000	1	17700000	1	2090000	1	5740000	1	0	0	8660000	2	2490000	1	0	0	0	0	0	0	8370000	1	0	0
653	QZT34526.1	transposase [Caldalkalibacillus thermarum TA2.A1]	13400000	1	15600000	1	16400000	1	12700000	1	4860000	2	4380000	2	12600000	1	11700000	1	22800000	2	10600000	1	0	0	2090000	1	5740000	1	0	1	8660000	2	2490000	1	0	0	0	0	4520000	1	8370000	1	0	0
654	QZT33548.1	transposase [Caldalkalibacillus thermarum TA2.A1]	13400000	1	15600000	1	16400000	1	12700000	1	0	0	0	0	12600000	1	11700000	1	0	0	10600000	1	0	0	2090000	1	5740000	1	0	0	0	0	0	0	0	0	0	0	0	0	0	0	0	0
655	QZT35081.1	transposase [Caldalkalibacillus thermarum TA2.A1]	13400000	1	15600000	1	16400000	1	12700000	1	4860000	2	4380000	2	12600000	1	11700000	1	22800000	2	10600000	1	0	0	2090000	1	5740000	1	0	1	0	0	2490000	1	0	0	0	0	0	0	8370000	1	0	0
656	QZT33454.1	transposase [Caldalkalibacillus thermarum TA2.A1]	13400000	1	15600000	1	16400000	1	12700000	1	0	0	0	0	12600000	1	11700000	1	0	0	10600000	1	0	0	2090000	1	5740000	1	0	0	0	0	0	0	0	0	0	0	0	0	0	0	0	0
657	QZT33875.1	transposase [Caldalkalibacillus thermarum TA2.A1]	13400000	1	15600000	1	16400000	1	12700000	1	4860000	2	4380000	2	12600000	1	11700000	1	22800000	2	10600000	1	17700000	1	2090000	1	5740000	1	0	0	0	0	2490000	1	0	0	0	0	0	0	8370000	1	2710000	2
658	QZT34546.1	transposase [Caldalkalibacillus thermarum TA2.A1]	13400000	1	15600000	1	16400000	1	12700000	1	4860000	2	4380000	2	12600000	1	11700000	1	22800000	2	10600000	1	17700000	1	2090000	1	5740000	1	0	0	8660000	2	2490000	1	0	0	0	0	0	0	8370000	1	0	0
659	QZT33935.1	transposase [Caldalkalibacillus thermarum TA2.A1]	13400000	1	15600000	1	16400000	1	12700000	1	0	0	0	0	12600000	1	11700000	1	0	0	10600000	1	0	0	2090000	1	5740000	1	0	0	0	0	0	0	0	0	0	0	0	0	0	0	0	0
660	QZT34308.1	transposase [Caldalkalibacillus thermarum TA2.A1]	13400000	1	15600000	1	16400000	1	12700000	1	4860000	2	4380000	2	12600000	1	11700000	1	22800000	2	10600000	1	17700000	1	2090000	1	5740000	1	0	0	8660000	2	2490000	1	0	0	0	0	4520000	1	8370000	1	0	0
661	QZT34404.1	transposase [Caldalkalibacillus thermarum TA2.A1]	13400000	1	15600000	1	16400000	1	12700000	1	4860000	2	4380000	2	12600000	1	11700000	1	22800000	2	10600000	1	17700000	1	2090000	1	5740000	1	0	0	8660000	2	2490000	1	0	0	0	0	0	0	8370000	1	0	0
662	QZT33244.1	transposase [Caldalkalibacillus thermarum TA2.A1]	13400000	1	15600000	1	16400000	1	12700000	1	4860000	2	4380000	2	12600000	1	11700000	1	22800000	2	10600000	1	0	0	2090000	1	5740000	1	0	1	8660000	2	2490000	1	0	0	0	0	0	0	8370000	1	0	0
663	QZT33906.1	transposase [Caldalkalibacillus thermarum TA2.A1]	13400000	1	15600000	1	16400000	1	12700000	1	4860000	2	4380000	2	12600000	1	11700000	1	22800000	2	10600000	1	17700000	1	2090000	1	5740000	1	0	0	8660000	2	2490000	1	0	0	0	0	0	0	8370000	1	0	0
664	QZT33928.1	transposase [Caldalkalibacillus thermarum TA2.A1]	13400000	1	15600000	1	16400000	1	12700000	1	4860000	2	4380000	2	12600000	1	11700000	1	22800000	2	10600000	1	17700000	1	2090000	1	5740000	1	0	0	8660000	2	2490000	1	0	0	0	0	0	0	8370000	1	0	0
665	QZT34806.1	transposase [Caldalkalibacillus thermarum TA2.A1]	13400000	1	15600000	1	16400000	1	12700000	1	4860000	2	4380000	2	12600000	1	11700000	1	22800000	2	10600000	1	17700000	1	2090000	1	5740000	1	0	0	8660000	2	2490000	1	0	0	0	0	0	0	8370000	1	0	0
666	QZT34824.1	transposase [Caldalkalibacillus thermarum TA2.A1]	13400000	1	15600000	1	16400000	1	12700000	1	4860000	2	4380000	2	12600000	1	11700000	1	22800000	2	10600000	1	0	0	2090000	1	5740000	1	0	0	8660000	2	2490000	1	0	0	0	0	0	0	8370000	1	0	0
667	QZT35075.1	transposase [Caldalkalibacillus thermarum TA2.A1]	13400000	1	15600000	1	16400000	1	12700000	1	4860000	2	4380000	2	12600000	1	11700000	1	22800000	2	10600000	1	0	0	2090000	1	5740000	1	0	0	8660000	2	2490000	1	0	0	0	0	0	0	8370000	1	0	0
668	QZT32879.1	transposase [Caldalkalibacillus thermarum TA2.A1]	13400000	1	15600000	1	16400000	1	12700000	1	4860000	2	4380000	2	12600000	1	11700000	1	22800000	2	10600000	1	17700000	1	2090000	1	5740000	1	0	0	8660000	2	2490000	1	0	0	0	0	0	0	8370000	1	0	0
669	QZT35067.1	transposase [Caldalkalibacillus thermarum TA2.A1]	13400000	1	15600000	1	16400000	1	12700000	1	4860000	2	4380000	2	12600000	1	11700000	1	22800000	2	10600000	1	17700000	1	2090000	1	5740000	1	0	0	8660000	2	2490000	1	0	0	0	0	0	0	8370000	1	0	0
670	QZT34686.1	transposase [Caldalkalibacillus thermarum TA2.A1]	13400000	1	15600000	1	16400000	1	12700000	1	4860000	2	4380000	2	12600000	1	11700000	1	22800000	2	10600000	1	17700000	1	2090000	1	5740000	1	0	0	8660000	2	2490000	1	0	0	0	0	0	0	8370000	1	0	0
671	QZT32970.1	aspartate kinase [Caldalkalibacillus thermarum TA2.A1]	2380000	1	0	1	6230000	1	6060000	1	0	0	1110000	1	1540000	1	1200000	1	6840000	1	6990000	1	0	0	0	0	3450000	1	2520000	1	0	0	0	0	0	0	0	0	0	0	0	0	47600000	9
672	QZT34318.1	ABC transporter permease [Caldalkalibacillus thermarum TA2.A1]	671000	1	0	0	2100000	1	1630000	1	0	0	0	0	0	0	620000	1	2200000	1	0	0	0	0	0	0	0	0	0	0	0	0	0	0	0	0	0	0	0	0	0	0	0	0
673	QZT35085.1	transcriptional repressor [Caldalkalibacillus thermarum TA2.A1]	3140000	1	2740000	1	4930000	1	2770000	1	0	0	2820000	1	2750000	1	1930000	1	2450000	1	0	0	0	0	0	0	0	0	2180000	1	0	1	1450000	1	0	0	0	0	0	0	0	0	15600000	4
674	QZT35096.1	NAD kinase [Caldalkalibacillus thermarum TA2.A1]	1400000	1	4560000	2	6000000	2	1950000	1	2140000	1	1560000	1	2280000	1	3290000	2	3020000	2	0	0	0	0	0	0	5720000	1	5100000	1	4530000	1	3730000	1	0	0	0	0	0	0	0	0	15100000	4
675	QZT32595.1	ABC-ATPase domain-containing protein [Caldalkalibacillus thermarum TA2.A1]	2730000	1	869000	1	2840000	1	597000	1	0	0	0	0	0	0	444000	1	22300000	3	7650000	1	0	0	0	0	754000	1	519000	1	58200000	9	23700000	6	0	0	20100000	4	0	0	0	0	77500000	21
676	QZT33367.1	DNA repair protein RecO [Caldalkalibacillus thermarum TA2.A1]	7690000	1	5880000	1	0	0	0	0	0	0	0	0	0	0	0	0	3200000	1	0	0	0	0	0	0	835000	1	0	0	4080000	1	3230000	1	0	0	0	0	0	0	0	0	0	0
677	QZT32670.1	phosphate butyryltransferase [Caldalkalibacillus thermarum TA2.A1]	4610000	1	0	0	0	0	0	0	11200000	1	631000	1	0	0	0	0	15800000	2	10600000	1	0	0	0	0	0	0	0	0	4270000	2	3240000	2	0	0	0	0	0	0	0	0	43200000	11
678	QZT33426.1	Na+/H+ antiporter subunit E [Caldalkalibacillus thermarum TA2.A1]	26300000	1	26300000	1	0	0	16700000	1	0	0	0	0	0	0	15500000	1	13100000	1	12100000	1	0	0	0	0	0	0	0	0	1290000	1	0	0	0	0	0	0	0	0	6550000	1	3230000	1
679	QZT32506.1	GyrI-like domain-containing protein [Caldalkalibacillus thermarum TA2.A1]	2350000	1	2400000	1	3510000	2	1860000	1	0	1	0	0	2250000	1	1370000	1	1270000	1	0	0	0	0	0	0	0	0	0	0	0	0	0	0	0	0	0	0	0	0	0	0	0	0
680	QZT33291.1	ectoine/hydroxyectoine ABC transporter ATP-binding protein EhuA [Caldalkalibacillus thermarum TA2.A1]	8290000	1	5760000	1	5930000	1	0	0	2240000	1	1230000	1	4180000	1	2550000	1	2630000	1	3770000	1	5530000	1	7960000	2	0	0	5370000	1	0	0	0	0	0	0	0	0	0	0	0	0	0	0
681	QZT34021.1	recombinase family protein [Caldalkalibacillus thermarum TA2.A1]	1310000	1	1530000	1	498000	1	0	0	1360000	1	0	0	0	0	929000	1	0	1	0	0	0	0	0	0	6200000	1	0	1	13900000	1	11800000	1	0	0	0	0	0	0	0	0	9810000	10
682	QZT33021.1	flagellar motor switch protein FliG [Caldalkalibacillus thermarum TA2.A1]	0	1	0	0	10300000	1	6450000	1	832000	1	4030000	3	8440000	2	4180000	1	5800000	3	4430000	1	2780000	1	11800000	2	22900000	6	15200000	5	10600000	3	7690000	4	0	0	0	0	0	0	3410000	1	108000	1
683	QZT34097.1	CoA-acylating methylmalonate-semialdehyde dehydrogenase [Caldalkalibacillus thermarum TA2.A1]	764000	1	23300000	2	4300000	1	24300000	1	26400000	2	25100000	2	14500000	1	0	1	3840000	1	3630000	1	33600000	7	23200000	5	77900000	10	50400000	8	53900000	6	29100000	5	0	0	0	0	0	0	0	0	52200000	12
684	QZT34742.1	type I-B CRISPR-associated protein Cas5b [Caldalkalibacillus thermarum TA2.A1]	7030000	1	0	0	0	0	0	0	0	0	1270000	1	7340000	2	0	0	5410000	1	972000	1	9620000	2	8560000	3	42700000	4	40400000	4	69400000	4	58700000	6	0	0	0	0	0	0	0	0	156000000	9
685	QZT35171.1	WYL domain-containing protein [Caldalkalibacillus thermarum TA2.A1]	407000	1	3300000	1	0	0	2970000	1	2640000	1	4230000	1	0	0	2770000	2	0	0	5130000	2	0	0	0	0	1240000	2	6680000	2	1320000	1	5150000	2	0	0	0	0	0	0	2410000	1	3340000	3
686	QZT33911.1	permease-like cell division protein FtsX [Caldalkalibacillus thermarum TA2.A1]	61800000	1	0	0	0	0	0	0	48000000	1	44100000	1	65000000	1	45400000	1	44500000	1	0	0	55800000	1	53900000	1	128000000	3	119000000	2	156000000	4	99100000	2	0	0	0	0	0	0	0	0	210000	1
687	QZT35245.1	RraA family protein [Caldalkalibacillus thermarum TA2.A1]	5260000	1	5040000	1	6430000	1	6490000	2	2830000	1	2420000	1	3690000	1	2620000	1	0	0	2880000	1	0	0	0	0	0	0	303000	1	0	0	0	0	0	0	0	0	0	0	0	0	354000000	11
688	QZT34164.1	NADH-quinone oxidoreductase subunit A [Caldalkalibacillus thermarum TA2.A1]	1940000	1	1560000	1	12900000	1	0	0	11000000	2	2960000	1	1390000	1	859000	1	0	0	0	0	0	0	0	0	0	0	0	0	0	0	0	0	7260000	1	0	0	0	0	0	0	3750000	2
689	QZT33189.1	DUF1885 family protein [Caldalkalibacillus thermarum TA2.A1]	56100000	1	0	1	7690000	1	22100000	1	236000000	2	212000000	2	15800000	2	39400000	1	0	1	0	1	0	0	0	0	157000000	2	110000000	1	6700000	1	122000000	2	161000000	3	550000000	4	155000000	2	693000000	4	109000000	5
690	QZT32809.1	ATP-dependent DNA helicase RecG [Caldalkalibacillus thermarum TA2.A1]	2380000	1	0	1	1550000	1	0	1	0	1	0	0	927000	2	1630000	2	3490000	2	547000	1	0	0	0	0	0	0	0	0	0	0	331000	1	0	0	0	0	0	0	0	0	0	0
691	QZT33279.1	AbgT family transporter [Caldalkalibacillus thermarum TA2.A1]	7220000	1	0	0	7700000	1	0	0	0	0	0	0	3310000	1	3370000	1	10900000	1	9550000	1	0	0	0	0	0	0	0	0	0	0	0	0	7730000	1	0	0	0	0	0	0	0	1
692	QZT33137.1	pantetheine-phosphate adenylyltransferase [Caldalkalibacillus thermarum TA2.A1]	3110000	1	0	0	2940000	1	0	0	0	0	0	0	2750000	1	2650000	1	0	0	0	0	0	0	0	0	3100000	1	2960000	2	2090000	1	2660000	1	0	0	0	0	0	0	0	0	1330000	2
693	QZT34908.1	glucose-6-phosphate isomerase [Caldalkalibacillus thermarum TA2.A1]	10700000	2	7540000	2	25700000	2	44600000	3	2540000	1	2600000	1	8420000	2	15400000	4	10700000	1	27100000	2	0	0	0	0	29300000	6	20700000	5	103000000	9	58600000	7	0	0	0	1	0	0	0	0	539000000	32
694	QZT34200.1	3-hydroxybutyryl-CoA dehydrogenase [Caldalkalibacillus thermarum TA2.A1]	4160000	1	0	0	0	1	1940000	1	0	0	0	0	0	0	3460000	1	0	0	0	0	6260000	1	4890000	1	29900000	3	7570000	2	16900000	3	20500000	3	0	0	11100000	1	0	0	0	0	233000000	13
695	QZT34331.1	DNA polymerase III subunit delta' [Caldalkalibacillus thermarum TA2.A1]	5940000	1	0	0	7030000	1	7610000	1	0	0	0	0	3280000	1	3890000	1	8340000	2	6860000	2	4380000	2	2920000	2	4780000	3	1490000	1	10800000	3	0	1	0	0	0	0	0	0	0	0	1900000	2
696	QZT33382.1	histidine triad nucleotide-binding protein [Caldalkalibacillus thermarum TA2.A1]	11200000	1	25700000	2	47400000	3	25100000	1	34700000	2	1850000	1	28500000	1	35300000	3	3820000	1	33600000	2	132000000	2	102000000	3	197000000	2	131000000	3	189000000	6	85500000	3	6380000	1	80900000	2	0	0	41600000	3	2130000000	9
697	QZT33012.1	flagellar motor switch phosphatase FliY [Caldalkalibacillus thermarum TA2.A1]	1480000	1	1290000	1	0	1	857000	1	0	1	0	0	0	0	607000	1	0	0	0	0	0	0	615000	1	2590000	1	0	0	0	0	0	0	0	0	0	0	0	0	0	0	707000	1
698	QZT34307.1	DNA gyrase subunit A [Caldalkalibacillus thermarum TA2.A1]	15300000	2	9710000	2	11800000	3	0	0	279000	1	0	0	6750000	2	4330000	2	3490000	1	7540000	2	3830000	1	8320000	2	4990000	2	1990000	2	21800000	7	25300000	6	0	0	0	0	0	0	0	0	99400000	30
699	QZT33891.1	ATP-dependent Clp endopeptidase proteolytic subunit ClpP [Caldalkalibacillus thermarum TA2.A1]	5640000	1	3880000	1	0	0	0	0	5460000	1	4940000	1	3290000	1	2960000	1	0	1	801000	1	0	0	0	0	16200000	1	11100000	1	0	0	8080000	1	0	1	18400000	1	0	0	0	0	5020000	3
700	QZT32530.1	tRNA (guanosine(46)-N7)-methyltransferase TrmB [Caldalkalibacillus thermarum TA2.A1]	359000	1	0	0	1360000	1	558000	1	0	0	0	0	1430000	1	0	0	1470000	2	868000	1	0	0	0	0	0	0	0	0	12000000	1	9460000	1	0	0	0	0	0	0	0	0	32000000	10
701	QZT32651.1	acetyl-CoA carboxylase biotin carboxylase subunit [Caldalkalibacillus thermarum TA2.A1]	11700000	1	11300000	1	13600000	1	12100000	2	25300000	5	3760000	1	0	0	2330000	1	8130000	1	1810000	1	66800000	4	55000000	4	52500000	4	26800000	4	61700000	9	40800000	4	0	0	0	0	0	0	0	0	293000000	17
702	QZT34755.1	CRISPR-associated helicase/endonuclease Cas3 [Caldalkalibacillus thermarum TA2.A1]	1940000	2	1350000	1	0	0	1290000	1	0	0	0	0	1040000	1	0	0	0	0	0	0	0	0	0	0	0	0	0	0	0	0	45000	1	0	0	0	0	0	0	0	0	0	0
703	QZT32907.1	MBL fold metallo-hydrolase [Caldalkalibacillus thermarum TA2.A1]	1740000	1	1320000	1	0	0	0	0	0	1	1830000	1	0	0	0	0	1280000	1	0	0	0	0	4130000	1	3270000	1	4380000	2	3190000	1	4080000	2	0	0	0	0	0	0	0	0	176000000	23
704	QZT34392.1	DNA integrity scanning diadenylate cyclase DisA [Caldalkalibacillus thermarum TA2.A1]	1400000	1	4970000	3	3630000	2	3370000	2	0	0	0	0	1920000	1	3430000	2	2740000	1	2930000	1	0	0	0	0	15300000	3	15500000	2	26900000	3	7950000	2	0	0	0	0	0	0	0	0	15900000	7
705	QZT34188.1	50S ribosomal protein L31 [Caldalkalibacillus thermarum TA2.A1]	64500000	1	58200000	1	31200000	1	27500000	1	63600000	1	59600000	1	38000000	1	34900000	1	28100000	1	0	0	118000000	1	103000000	1	157000000	1	168000000	1	242000000	1	194000000	2	0	0	171000000	2	0	0	161000000	1	107000000	5
706	QZT32895.1	thiol reductant ABC exporter subunit CydC [Caldalkalibacillus thermarum TA2.A1]	24900000	1	26300000	1	41200000	2	43000000	3	122000000	6	123000000	5	19200000	1	35300000	4	92300000	4	43700000	5	106000000	4	55200000	3	72900000	5	24900000	4	75600000	6	31900000	6	18100000	1	16400000	2	0	0	5490000	1	5490000	7
707	QZT34289.1	16S rRNA (guanine(527)-N(7))-methyltransferase RsmG [Caldalkalibacillus thermarum TA2.A1]	2580000	1	0	0	0	0	0	0	0	0	0	0	0	0	0	0	0	0	0	0	0	0	6720000	2	0	0	5400000	1	0	0	5190000	1	0	0	0	0	0	0	0	0	23000000	8
708	QZT33802.1	adenosylcobinamide-phosphate synthase CbiB [Caldalkalibacillus thermarum TA2.A1]	13300000	1	0	0	0	0	4880000	1	1610000	1	1690000	1	4210000	1	4220000	1	14000000	1	12900000	1	0	0	2460000	1	11200000	2	1410000	1	18000000	2	10500000	2	0	0	0	0	0	0	0	0	3320000	2
709	QZT34725.1	argininosuccinate synthase [Caldalkalibacillus thermarum TA2.A1]	933000	1	0	0	387000	1	266000	1	0	0	0	0	2470000	2	378000	1	360000	1	0	0	0	0	0	0	0	0	0	0	3080000	2	2220000	2	0	0	0	0	0	0	0	0	335000000	21
710	QZT33501.1	50S ribosomal protein L27 [Caldalkalibacillus thermarum TA2.A1]	151000000	1	123000000	1	0	0	0	0	0	0	71300000	2	0	0	0	0	41200000	1	35900000	1	231000000	3	232000000	3	61700000	2	60000000	2	349000000	4	76800000	3	0	0	248000000	3	0	0	0	0	26000000	3
711	QZT34444.1	translation initiation factor IF-1 [Caldalkalibacillus thermarum TA2.A1]	3370000	1	8170000	1	0	0	0	0	10200000	1	10600000	1	4250000	1	3370000	1	0	0	0	0	0	0	0	0	17000000	2	10500000	1	31600000	2	26600000	2	0	0	0	0	0	0	0	0	61700000	3
712	QZT35358.1	tRNA 4-thiouridine(8) synthase ThiI [Caldalkalibacillus thermarum TA2.A1]	21200000	1	14400000	1	5860000	2	622000	1	5720000	2	17100000	1	17100000	2	2250000	2	0	0	18900000	2	27900000	3	15800000	2	19700000	2	0	0	3210000	1	18300000	3	0	0	0	0	0	0	0	0	23800000	8
713	QZT33352.1	cyclase family protein [Caldalkalibacillus thermarum TA2.A1]	2750000	1	0	0	0	0	2170000	2	2420000	1	1790000	2	0	0	0	0	3910000	3	3340000	2	0	0	0	0	1970000	1	1920000	2	6430000	2	18200000	5	0	0	6830000	1	0	0	6880000	2	138000000	10
714	QZT33869.1	hypothetical protein HUR95_16975 [Caldalkalibacillus thermarum TA2.A1]	505000	1	0	0	0	0	0	0	2330000	1	1650000	1	1310000	1	0	0	13300000	1	0	0	0	0	0	0	0	0	0	0	0	0	0	0	0	0	0	0	0	0	0	0	0	1
715	QZT33540.1	ATP-dependent protease ATP-binding subunit ClpX [Caldalkalibacillus thermarum TA2.A1]	5340000	1	0	0	0	1	2050000	1	2120000	1	1980000	1	0	0	2380000	1	6740000	3	0	0	14300000	5	12100000	4	20900000	2	30400000	2	50000000	4	42300000	5	0	0	5120000	1	0	0	0	0	27000000	13
716	QZT34184.1	threonylcarbamoyl-AMP synthase [Caldalkalibacillus thermarum TA2.A1]	0	1	9340000	2	3960000	1	4640000	2	6590000	3	8830000	2	3840000	1	0	0	18600000	2	13800000	1	9080000	2	21500000	3	41200000	5	37400000	2	44300000	4	71200000	7	0	0	0	0	0	0	0	0	173000000	16
717	QZT32638.1	DUF1385 domain-containing protein [Caldalkalibacillus thermarum TA2.A1]	5780000	1	5320000	1	5290000	1	4610000	1	3830000	1	0	0	0	0	0	0	6380000	2	7860000	1	0	0	0	0	0	0	0	0	0	0	0	0	0	0	0	0	0	0	0	0	0	0
718	QZT34179.1	serine hydroxymethyltransferase [Caldalkalibacillus thermarum TA2.A1]	2370000	1	8460000	2	18500000	2	13700000	1	5200000	1	4710000	1	16300000	3	8840000	2	41900000	2	19500000	3	38100000	4	39900000	5	52000000	4	40500000	4	301000000	10	178000000	9	134000000	4	15300000	2	0	0	0	0	3430000000	28
719	QZT33185.1	DUF1054 domain-containing protein [Caldalkalibacillus thermarum TA2.A1]	10100000	1	0	0	0	0	1330000	1	0	0	0	0	0	0	0	0	0	0	0	0	3380000	1	0	0	10500000	2	22400000	3	32400000	3	31000000	3	0	0	0	0	0	0	0	0	308000000	17
720	QZT34626.1	2-dehydropantoate 2-reductase [Caldalkalibacillus thermarum TA2.A1]	762000	1	792000	1	0	0	3310000	2	0	0	0	0	0	0	0	0	591000	1	0	0	0	0	0	0	0	1	0	0	5300000	1	5180000	1	0	0	0	0	0	0	0	0	126000000	15
721	QZT33475.1	D-tyrosyl-tRNA(Tyr) deacylase [Caldalkalibacillus thermarum TA2.A1]	1180000	1	0	1	938000	2	0	1	3440000	1	1550000	1	0	0	1320000	1	0	0	0	0	4280000	1	3790000	1	5600000	1	0	0	0	0	7400000	1	1760000	1	0	0	0	0	2090000	1	17600000	4
722	QZT35106.1	adaptor protein MecA [Caldalkalibacillus thermarum TA2.A1]	8280000	1	0	0	5430000	1	5250000	1	0	0	3860000	2	4750000	1	0	0	5340000	1	4340000	1	0	0	1420000	1	3270000	1	23200000	2	9760000	3	15800000	3	0	0	0	0	0	0	0	0	0	0
723	QZT34024.1	DegV family protein [Caldalkalibacillus thermarum TA2.A1]	3630000	1	0	0	1810000	1	0	0	0	0	0	0	1370000	1	0	0	45800000	4	56900000	4	0	0	0	0	4970000	2	2830000	1	12200000	2	11600000	3	0	0	25200000	3	0	0	0	0	466000000	15
724	QZT33908.1	PDZ domain-containing protein [Caldalkalibacillus thermarum TA2.A1]	13100000	1	15500000	1	0	0	0	0	12600000	1	14800000	1	6460000	1	9770000	1	3990000	1	0	1	0	0	0	0	0	0	0	0	0	1	0	1	0	0	0	0	0	0	0	0	0	0
725	QZT35009.1	VWA domain-containing protein [Caldalkalibacillus thermarum TA2.A1]	2490000	1	2550000	1	1740000	1	1740000	1	0	0	0	0	0	1	1370000	1	1060000	1	0	0	0	0	0	0	0	0	0	0	1850000	1	0	0	0	0	0	0	0	0	0	0	2980000	3
726	QZT33363.1	DNA primase [Caldalkalibacillus thermarum TA2.A1]	4580000	1	0	0	0	0	1910000	1	0	0	0	0	0	0	3030000	2	0	0	0	0	2620000	2	9660000	3	6660000	1	2020000	1	2910000	3	0	0	0	0	0	0	0	0	2480000	1	888000	4
727	QZT35293.1	amidophosphoribosyltransferase [Caldalkalibacillus thermarum TA2.A1]	1610000	1	0	0	3800000	1	1810000	1	0	0	1310000	1	5300000	2	3270000	2	2680000	2	0	0	0	0	0	0	8510000	3	0	0	9350000	4	486000	1	0	0	0	0	0	0	0	0	0	2
728	QZT32977.1	30S ribosomal protein S15 [Caldalkalibacillus thermarum TA2.A1]	72900000	1	64500000	1	35300000	1	31100000	1	0	0	10200000	1	24200000	1	23000000	1	69100000	1	58900000	1	67900000	3	81600000	3	70200000	1	94200000	2	153000000	5	111000000	4	0	0	634000000	3	0	0	0	0	165000000	5
729	QZT33643.1	metalloregulator ArsR/SmtB family transcription factor [Caldalkalibacillus thermarum TA2.A1]	4890000	1	4200000	1	1940000	1	0	0	7000000	1	0	0	2940000	1	0	0	0	0	0	0	5500000	1	5580000	1	6750000	1	7080000	1	8690000	1	6760000	1	0	0	0	0	0	0	0	0	2810000	1
730	QZT34951.1	DNA polymerase I [Caldalkalibacillus thermarum TA2.A1]	3860000	1	2960000	1	3150000	1	2360000	1	0	0	0	0	0	0	0	0	0	0	0	0	0	0	0	0	1400000	1	0	0	0	0	0	0	0	0	0	0	0	0	0	0	2520000	5
731	QZT33621.1	electron transfer flavoprotein subunit beta/FixA family protein [Caldalkalibacillus thermarum TA2.A1]	3090000	1	3080000	2	2350000	1	1510000	1	9570000	2	2250000	2	2540000	2	863000	1	28100000	3	42700000	3	3910000	1	0	0	36900000	3	11500000	2	41000000	3	32000000	4	0	0	22500000	2	0	0	4790000	1	574000000	9
732	QZT33572.1	electron transfer flavoprotein subunit beta/FixA family protein [Caldalkalibacillus thermarum TA2.A1]	3090000	1	3080000	2	2350000	1	1510000	1	9570000	2	2250000	2	0	0	863000	1	28100000	3	42700000	3	3910000	1	0	0	0	0	0	0	0	0	0	0	0	0	0	0	0	0	0	0	0	1
733	QZT33414.1	leucine--tRNA ligase [Caldalkalibacillus thermarum TA2.A1]	11200000	1	0	1	22900000	3	17200000	3	8920000	1	0	0	2120000	1	1630000	2	10500000	2	1870000	1	869000	1	6800000	2	9350000	2	6780000	2	12500000	3	4530000	1	0	0	0	0	0	0	0	0	251000000	38
734	QZT33471.1	ABC transporter ATP-binding protein [Caldalkalibacillus thermarum TA2.A1]	2860000	1	8310000	2	0	0	2100000	1	16000000	3	15000000	4	6040000	2	2990000	2	4620000	2	2720000	1	37400000	2	17200000	1	29700000	1	15600000	1	55500000	4	36900000	3	0	0	0	0	0	0	0	0	131000000	11
735	QZT32795.1	guanylate kinase [Caldalkalibacillus thermarum TA2.A1]	0	1	1260000	1	27400000	2	0	0	0	0	4790000	2	0	1	1650000	1	1980000	2	0	0	2710000	1	0	0	33100000	3	12100000	2	77300000	5	78400000	6	0	0	0	0	0	0	6860000	1	168000000	17
736	QZT33419.1	ribosome biogenesis GTPase YqeH [Caldalkalibacillus thermarum TA2.A1]	1050000	1	0	1	1770000	1	1710000	1	0	0	0	0	0	0	302000	1	2690000	1	2310000	1	3330000	1	2970000	1	7240000	2	4180000	2	20100000	5	2620000	2	0	0	0	0	0	0	0	0	3610000	7
737	QZT34020.1	tetratricopeptide repeat protein [Caldalkalibacillus thermarum TA2.A1]	18000000	1	17300000	1	10300000	1	11100000	1	0	0	0	0	0	0	0	1	0	0	0	0	0	0	5140000	2	9030000	1	9250000	1	16900000	2	7070000	1	0	0	45500000	4	0	0	24500000	1	45600000	7
738	QZT35041.1	IS1380 family transposase [Caldalkalibacillus thermarum TA2.A1]	993000	1	4210000	1	2810000	1	4480000	2	2860000	1	1870000	1	2960000	1	0	0	1870000	1	4860000	1	0	0	0	0	12800000	3	11800000	3	18800000	4	18900000	5	0	0	0	0	0	0	12200000	2	2740000	4
739	QZT34564.1	IS1380 family transposase [Caldalkalibacillus thermarum TA2.A1]	993000	1	4210000	1	2810000	1	4480000	2	2860000	1	1870000	1	2960000	1	0	0	1870000	1	4860000	1	0	0	0	0	12800000	3	11800000	3	18800000	4	18900000	5	0	0	0	0	0	0	12200000	2	2740000	4
740	QZT33079.1	IS1380 family transposase [Caldalkalibacillus thermarum TA2.A1]	993000	1	4210000	1	2810000	1	4480000	2	2860000	1	1870000	1	2960000	1	0	0	1870000	1	4860000	1	0	0	0	0	12800000	3	11800000	3	18800000	4	18900000	5	0	0	0	0	0	0	12200000	2	2740000	4
741	QZT33224.1	IS1380 family transposase [Caldalkalibacillus thermarum TA2.A1]	993000	1	4210000	1	2810000	1	4480000	2	2860000	1	1870000	1	2960000	1	0	0	1870000	1	4860000	1	0	0	0	0	0	0	0	0	18800000	4	0	0	0	0	0	0	0	0	12200000	2	2740000	4
742	QZT33092.1	TRAP transporter permease [Caldalkalibacillus thermarum TA2.A1]	1920000	1	1850000	1	7630000	1	5930000	1	8830000	1	6060000	1	6190000	1	4120000	1	4740000	1	0	1	0	0	0	0	0	0	0	0	0	0	0	0	0	0	0	0	0	0	0	0	12700000	4
743	QZT33086.1	ribonuclease HII [Caldalkalibacillus thermarum TA2.A1]	0	1	0	0	827000	1	470000	1	0	0	0	0	0	0	0	0	714000	1	0	0	0	0	0	0	0	0	0	0	0	0	0	0	0	0	0	0	0	0	0	0	0	0
744	QZT32938.1	DNA mismatch repair endonuclease MutL [Caldalkalibacillus thermarum TA2.A1]	4080000	1	3250000	2	0	0	3580000	1	0	0	0	0	2810000	1	2570000	1	4340000	2	0	1	8800000	2	4730000	1	4080000	1	3970000	1	0	0	0	0	0	0	0	0	0	0	0	0	0	0
745	QZT35354.1	UDP-N-acetylmuramate--L-alanine ligase [Caldalkalibacillus thermarum TA2.A1]	2700000	1	0	0	3840000	1	2880000	1	0	0	0	0	1460000	1	1930000	1	0	0	0	0	0	0	3250000	1	2260000	1	0	0	2880000	1	2270000	1	0	0	0	0	0	0	0	0	5710000	7
746	QZT35127.1	YjcG family protein [Caldalkalibacillus thermarum TA2.A1]	9570000	1	12700000	2	45300000	2	34200000	1	0	0	17400000	1	39700000	2	32900000	5	38800000	2	17600000	2	0	0	0	0	16100000	2	16400000	2	58400000	5	24800000	3	0	0	0	0	0	0	22000000	1	916000000	14
747	QZT32867.1	PTS glucose transporter subunit IIA [Caldalkalibacillus thermarum TA2.A1]	4250000	1	0	0	0	0	0	0	0	0	0	1	0	0	1530000	1	0	0	0	0	0	0	0	0	0	0	0	0	0	0	0	0	0	0	0	0	0	0	0	0	135000000	9
748	QZT32980.1	bifunctional oligoribonuclease/PAP phosphatase NrnA [Caldalkalibacillus thermarum TA2.A1]	2470000	1	2790000	1	0	0	2480000	1	0	0	2010000	1	0	0	931000	1	0	0	0	0	0	0	7250000	1	4370000	1	0	0	2580000	1	897000	1	0	0	0	0	0	0	0	0	8400000	7
749	QZT34467.1	ABC transporter ATP-binding protein [Caldalkalibacillus thermarum TA2.A1]	2500000	1	0	0	0	0	0	0	0	0	0	0	0	0	0	0	0	0	0	0	0	0	0	0	0	0	0	0	0	0	0	0	0	0	0	0	0	0	0	0	0	0
750	QZT35236.1	inositol 2-dehydrogenase [Caldalkalibacillus thermarum TA2.A1]	2040000	1	0	0	0	0	0	0	0	0	0	0	0	0	0	0	0	0	0	0	0	0	0	0	0	0	0	0	1610000	3	0	0	0	0	0	0	0	0	0	0	0	0
751	QZT33698.1	hypothetical protein HUR95_15975 [Caldalkalibacillus thermarum TA2.A1]	8040000	1	6450000	1	9120000	2	6860000	1	8540000	1	8180000	1	8350000	1	5010000	1	5690000	1	0	0	2930000	1	2580000	1	3240000	1	2540000	1	3030000	1	4860000	3	0	0	0	0	0	0	0	0	7200000	3
752	QZT34984.1	M42 family metallopeptidase [Caldalkalibacillus thermarum TA2.A1]	708000	1	0	1	1820000	1	0	1	5750000	2	982000	1	2350000	1	2300000	2	14300000	2	0	1	23100000	2	14100000	2	46900000	5	204000	2	76000000	9	46800000	5	143000000	2	11400000	2	7110000	1	1020000	1	147000000	18
753	QZT32822.1	30S ribosomal protein S16 [Caldalkalibacillus thermarum TA2.A1]	49800000	1	51900000	1	30300000	1	29900000	1	48500000	1	51600000	2	0	0	27900000	1	18200000	1	22100000	2	40600000	2	97300000	1	245000000	2	145000000	3	200000000	2	230000000	2	0	0	97200000	3	0	0	39300000	1	129000000	3
754	QZT32760.1	methyltransferase domain-containing protein [Caldalkalibacillus thermarum TA2.A1]	1100000	1	1010000	1	0	0	0	0	0	0	0	0	549000	1	532000	1	2180000	1	0	0	0	0	0	0	0	0	0	0	806000	1	820000	1	0	0	0	0	0	0	0	0	4590000	5
755	QZT32986.1	ribosome maturation factor RimP [Caldalkalibacillus thermarum TA2.A1]	1230000	1	785000	1	0	0	0	0	3350000	1	0	0	0	0	0	0	0	0	0	0	18600000	2	17100000	2	19600000	5	6230000	2	9950000	1	1310000	1	7510000	1	0	0	0	0	2680000	1	3440000	2
756	QZT32680.1	M20/M25/M40 family metallo-hydrolase [Caldalkalibacillus thermarum TA2.A1]	921000	1	753000	1	0	1	6040000	1	745000	1	2330000	1	3020000	1	3810000	1	5060000	1	1900000	1	6000000	1	5130000	1	13000000	3	9920000	2	8390000	2	3050000	1	0	0	0	0	0	0	0	0	492000	2
757	QZT33134.1	nucleotidyltransferase [Caldalkalibacillus thermarum TA2.A1]	9590000	1	9340000	2	10100000	2	8860000	2	0	0	5590000	2	8030000	2	6060000	2	4700000	2	11400000	4	9580000	2	6350000	1	10200000	1	0	0	27300000	4	19500000	4	0	0	0	0	0	0	0	0	18900000	12
758	QZT33338.1	redoxin domain-containing protein [Caldalkalibacillus thermarum TA2.A1]	1640000	1	0	0	0	0	0	0	4680000	3	4650000	2	3410000	1	0	1	3370000	2	0	0	0	0	1770000	1	5300000	2	0	0	5950000	2	1470000	1	0	0	0	0	0	0	0	0	210000000	8
759	QZT33472.1	aspartate--tRNA ligase [Caldalkalibacillus thermarum TA2.A1]	1070000	1	9980000	1	15100000	2	11900000	1	7640000	1	6790000	1	12000000	2	9870000	2	4550000	2	10600000	2	2060000	1	6000000	2	8540000	1	7260000	1	12100000	5	17300000	4	0	0	0	0	0	0	0	0	445000000	39
760	QZT34938.1	DNA polymerase III subunit alpha [Caldalkalibacillus thermarum TA2.A1]	684000	1	665000	1	1490000	1	0	0	1820000	2	0	0	0	0	372000	1	0	0	0	0	775000	1	380000	1	794000	1	0	0	0	0	0	0	0	0	0	0	0	0	0	0	0	1
761	QZT34277.1	DeoR/GlpR family DNA-binding transcription regulator [Caldalkalibacillus thermarum TA2.A1]	1380000	1	1090000	1	959000	1	0	0	0	0	0	0	0	0	0	0	493000	1	0	0	0	0	0	0	0	0	184000	1	0	0	0	0	0	0	0	0	0	0	0	0	0	0
762	QZT33527.1	valine--tRNA ligase [Caldalkalibacillus thermarum TA2.A1]	8460000	1	7940000	1	17500000	2	18100000	3	19900000	3	15500000	3	9860000	2	11400000	3	3150000	1	3100000	1	0	1	9850000	5	31800000	5	4840000	3	53000000	6	16200000	4	0	0	0	0	0	0	0	0	810000000	49
763	QZT34068.1	glutathione ABC transporter substrate-binding protein [Caldalkalibacillus thermarum TA2.A1]	2750000	1	2430000	1	7620000	3	3140000	2	0	0	0	0	0	0	0	0	26700000	6	19700000	4	0	0	0	0	0	0	0	0	131000000	5	160000000	7	114000000	2	203000000	6	0	0	1790000	1	222000000	25
764	QZT32589.1	DUF1444 domain-containing protein [Caldalkalibacillus thermarum TA2.A1]	12800000	1	0	0	0	0	661000	1	0	0	0	0	745000	1	834000	1	0	0	13300000	2	0	0	99900	1	10200000	2	6250000	2	13100000	2	3990000	2	0	0	0	0	0	0	0	0	8530000	8
765	QZT32783.1	orotate phosphoribosyltransferase [Caldalkalibacillus thermarum TA2.A1]	0	1	1240000	1	0	0	0	0	0	0	0	0	0	0	0	0	0	0	0	0	0	0	0	0	0	0	0	0	2630000	1	1650000	1	0	0	0	0	0	0	0	0	0	0
766	QZT32857.1	hypothetical protein HUR95_10795 [Caldalkalibacillus thermarum TA2.A1]	12200000	1	0	0	0	0	0	0	0	0	0	0	0	0	0	0	0	0	0	0	0	0	0	0	0	0	0	0	0	0	0	0	0	0	61400000	1	0	0	0	0	4330000	3
767	QZT35094.1	Xaa-Pro peptidase family protein [Caldalkalibacillus thermarum TA2.A1]	3530000	1	9730000	2	0	0	7760000	2	7410000	2	0	0	0	0	2840000	1	5010000	2	2250000	1	9990000	1	9460000	1	457000	1	0	0	17600000	2	3300000	2	0	0	0	0	0	0	0	0	60500000	15
768	QZT34062.1	nucleotidyltransferase domain-containing protein [Caldalkalibacillus thermarum TA2.A1]	6660000	1	8920000	1	0	0	6060000	1	1740000	1	1430000	1	11900000	1	5040000	1	0	0	0	0	0	0	0	0	0	1	4050000	1	31600000	2	30800000	3	0	0	0	0	0	0	0	0	251000000	9
769	QZT34655.1	diacylglycerol kinase [Caldalkalibacillus thermarum TA2.A1]	3860000	1	4670000	2	7510000	2	7750000	3	27200000	1	25200000	1	9660000	3	6180000	4	7400000	3	2210000	2	39900000	2	45200000	4	33700000	2	15800000	2	45900000	5	33600000	4	19900000	1	0	0	0	0	42000000	2	11300000	4
770	QZT34264.1	30S ribosomal protein S18 [Caldalkalibacillus thermarum TA2.A1]	15100000	1	16100000	1	0	0	0	0	18100000	2	6100000	1	0	0	16700000	1	0	0	25400000	1	17800000	2	30000000	3	8230000	1	15600000	2	18500000	1	43200000	1	0	0	0	0	0	0	0	0	34100000	7
771	QZT35421.1	4-hydroxy-tetrahydrodipicolinate synthase [Caldalkalibacillus thermarum TA2.A1]	5850000	1	33800000	5	25700000	2	20700000	5	2060000	1	1270000	2	34500000	4	29900000	5	27800000	4	2980000	1	1590000	1	0	0	6770000	2	4480000	2	40500000	6	28900000	4	0	0	16100000	2	0	0	0	0	389000000	16
772	QZT35098.1	RDD family protein [Caldalkalibacillus thermarum TA2.A1]	9660000	1	7410000	1	0	0	0	0	0	0	0	0	5060000	1	0	0	12600000	1	4590000	1	0	0	0	0	0	0	0	0	0	0	0	0	0	0	0	0	0	0	0	0	0	0
773	QZT34596.1	MoxR family ATPase [Caldalkalibacillus thermarum TA2.A1]	1250000	1	1320000	1	1240000	1	735000	2	1680000	2	520000	1	647000	1	0	0	0	0	0	0	11800000	1	9480000	1	3440000	1	7300000	2	4570000	1	3300000	2	0	0	0	0	0	0	0	0	0	0
774	QZT35324.1	response regulator [Caldalkalibacillus thermarum TA2.A1]	1760000	1	0	0	0	0	0	0	0	0	0	0	0	0	0	0	0	0	0	0	4160000	1	5180000	2	0	0	4190000	1	143000000	2	0	0	0	0	0	0	0	0	0	0	0	0
775	QZT34402.1	RNA polymerase sporulation sigma factor SigH [Caldalkalibacillus thermarum TA2.A1]	2880000	1	0	0	3910000	1	2540000	1	2160000	1	1110000	1	2210000	1	867000	1	0	0	0	1	2500000	1	835000	1	2150000	1	0	0	1120000	1	0	0	0	0	0	0	0	0	0	0	0	0
776	QZT34022.1	hypothetical protein HUR95_00860 [Caldalkalibacillus thermarum TA2.A1]	18200000	1	13100000	1	10900000	1	7370000	1	0	0	0	0	0	0	0	0	0	0	0	0	0	0	0	0	2130000	1	0	0	0	0	0	0	0	0	0	0	0	0	0	0	83700000	4
777	QZT35073.1	hypothetical protein HUR95_07575 [Caldalkalibacillus thermarum TA2.A1]	2590000	1	1820000	1	0	0	0	0	0	0	0	0	1640000	1	0	0	0	0	0	0	0	0	0	0	0	0	0	0	0	0	0	0	0	0	0	0	0	0	0	0	0	0
778	QZT33246.1	M23 family metallopeptidase [Caldalkalibacillus thermarum TA2.A1]	4780000	1	4010000	1	3280000	1	0	0	0	0	1160000	1	0	0	0	0	0	0	5670000	2	0	0	0	0	0	0	0	0	3820000	2	2940000	1	0	0	0	0	0	0	0	0	0	0
779	QZT35057.1	bifunctional 3-deoxy-7-phosphoheptulonate synthase/chorismate mutase [Caldalkalibacillus thermarum TA2.A1]	1490000	1	1400000	1	0	0	0	0	2790000	1	11600000	2	0	0	10300000	2	0	0	0	0	35700000	2	16500000	2	27500000	3	9950000	1	40100000	4	31600000	4	0	0	0	0	0	0	2000000	1	487000000	17
780	QZT34047.1	sugar transferase [Caldalkalibacillus thermarum TA2.A1]	5180000	1	0	0	0	0	0	0	5260000	1	5710000	1	0	0	0	0	7960000	1	7120000	1	0	0	0	0	0	0	0	0	1060000	1	525000	1	0	0	0	0	0	0	0	0	0	0
781	QZT32870.1	radical SAM protein [Caldalkalibacillus thermarum TA2.A1]	2780000	1	0	0	0	0	2130000	1	0	0	1180000	1	0	0	2210000	2	6690000	2	0	0	9120000	1	0	0	7020000	1	0	0	395000	1	3470000	2	0	0	0	0	0	0	0	0	0	0
782	QZT32535.1	7-cyano-7-deazaguanine synthase QueC [Caldalkalibacillus thermarum TA2.A1]	0	1	0	0	4010000	1	0	1	0	0	0	0	8550000	2	8530000	2	0	0	0	0	0	0	3230000	1	10100000	1	0	0	26300000	3	21700000	3	0	0	0	0	0	0	0	0	83700000	8
783	QZT33704.1	replication-relaxation family protein [Caldalkalibacillus thermarum TA2.A1]	5960000	1	0	0	4500000	1	0	0	0	0	0	0	0	0	0	0	11400000	2	10500000	1	0	0	0	0	0	0	0	0	2870000	1	0	0	0	0	0	0	0	0	0	0	13000000	4
784	QZT33810.1	DUF2797 domain-containing protein [Caldalkalibacillus thermarum TA2.A1]	1790000	1	0	0	0	0	3560000	1	1300000	1	0	0	2850000	1	2050000	1	0	0	0	0	10700000	1	0	0	0	0	0	0	2960000	1	0	0	0	0	0	0	0	0	0	0	0	0
785	QZT32911.1	MBL fold metallo-hydrolase [Caldalkalibacillus thermarum TA2.A1]	7170000	1	2070000	1	0	0	1920000	1	11800000	3	11600000	2	8840000	4	2890000	2	4600000	3	0	0	19700000	2	960000	1	41600000	5	43400000	5	51500000	4	59300000	6	9040000	2	0	0	0	0	4310000	2	1410000000	33
786	QZT34333.1	DNA replication initiation control protein YabA [Caldalkalibacillus thermarum TA2.A1]	5170000	1	3770000	1	0	0	0	0	0	0	0	0	0	0	0	0	0	0	0	0	0	0	0	0	1670000	1	0	0	0	0	0	0	0	0	0	0	0	0	0	0	71400000	8
787	QZT34192.1	class II fructose-bisphosphatase [Caldalkalibacillus thermarum TA2.A1]	16200000	1	0	0	19700000	2	3560000	2	6490000	1	5180000	1	0	0	1150000	2	11700000	1	8080000	1	3080000	1	25400000	2	50800000	3	15400000	3	96200000	6	89400000	6	25400000	1	2010000	1	0	0	17000000	3	297000000	17
788	QZT33888.1	RNA polymerase factor sigma-54 [Caldalkalibacillus thermarum TA2.A1]	2990000	1	0	1	0	0	4750000	1	0	0	6390000	1	5900000	2	0	0	2800000	2	0	0	4560000	2	3770000	1	14700000	3	15800000	2	5520000	2	16000000	3	0	0	0	0	0	0	0	0	0	0
789	QZT34431.1	50S ribosomal protein L24 [Caldalkalibacillus thermarum TA2.A1]	34000000	1	76500000	1	0	0	0	0	65900000	1	0	1	36000000	2	32100000	1	0	0	0	0	561000000	4	552000000	6	630000000	6	654000000	6	817000000	5	1040000000	5	0	0	1200000000	7	0	0	24400000	1	177000000	7
790	QZT32731.1	c-type cytochrome [Caldalkalibacillus thermarum TA2.A1]	160000000	1	121000000	1	0	0	70300000	1	150000000	1	137000000	1	58400000	1	71100000	1	61900000	1	54800000	1	430000000	1	0	0	218000000	1	235000000	1	0	0	249000000	1	0	0	0	0	0	0	7830000	1	38500000	2
791	QZT32487.1	o-succinylbenzoate synthase [Caldalkalibacillus thermarum TA2.A1]	0	1	0	0	0	0	0	0	1730000	1	1140000	1	3810000	2	2800000	1	0	0	1140000	1	0	0	0	0	0	2	1690000	1	2330000	1	0	0	0	0	0	0	0	0	0	0	56000000	11
792	QZT32713.1	nucleoside-diphosphate kinase [Caldalkalibacillus thermarum TA2.A1]	534000	1	0	0	0	0	0	0	0	0	0	0	0	0	0	0	5510000	1	0	1	0	0	0	0	0	0	0	0	16700000	2	16600000	2	0	0	0	0	0	0	0	0	590000000	8
793	QZT32677.1	methylmalonyl-CoA mutase family protein [Caldalkalibacillus thermarum TA2.A1]	1150000	1	0	0	4570000	3	3880000	2	0	0	0	0	0	0	0	1	3890000	1	3860000	1	6020000	1	5230000	1	12000000	2	256000	1	7670000	4	9940000	5	2830000	1	0	0	0	0	0	0	72900000	15
794	QZT35061.1	transglycosylase domain-containing protein [Caldalkalibacillus thermarum TA2.A1]	931000	1	0	0	0	0	0	0	811000	1	0	0	0	0	0	0	9280000	5	3540000	2	0	0	0	0	0	0	0	0	33300000	4	11600000	3	0	0	0	0	0	0	0	0	310000	2
795	QZT32647.1	stage III sporulation protein AE [Caldalkalibacillus thermarum TA2.A1]	3670000	1	0	0	0	0	2310000	1	0	0	0	0	1430000	1	1430000	1	3140000	1	2690000	1	0	0	0	0	0	0	0	0	0	0	0	0	0	0	0	0	0	0	0	0	2660000	1
796	QZT34445.1	50S ribosomal protein L36 [Caldalkalibacillus thermarum TA2.A1]	96200000	1	0	0	0	0	0	0	90100000	2	64500000	1	0	0	38200000	1	19700000	1	0	0	439000000	4	270000000	2	373000000	3	307000000	3	436000000	4	309000000	3	0	0	464000000	2	0	0	0	0	35500000	4
797	QZT33196.1	acetoin utilization AcuB family protein [Caldalkalibacillus thermarum TA2.A1]	2650000	1	0	0	0	0	0	0	8960000	2	7110000	2	0	0	0	0	0	0	0	0	19400000	2	25600000	3	26600000	2	26900000	2	9470000	1	23100000	2	0	0	0	0	0	0	0	0	175000000	13
798	QZT34487.1	1 2-phenylacetyl-CoA epoxidase subunit A [Caldalkalibacillus thermarum TA2.A1]	2320000	1	0	0	3090000	1	0	0	3910000	1	7420000	2	0	0	2150000	1	0	0	0	0	20700000	1	24600000	2	41900000	4	9020000	3	24600000	5	3320000	2	0	0	0	0	0	0	0	0	2110000	2
799	QZT34387.1	CtsR family transcriptional regulator [Caldalkalibacillus thermarum TA2.A1]	11600000	1	12200000	2	0	0	0	0	8330000	1	7100000	1	3790000	1	0	0	16600000	2	1860000	1	18800000	2	0	0	16900000	3	22700000	3	31400000	3	43100000	4	0	0	0	0	0	0	0	0	7830000	5
800	QZT33651.1	DUF951 domain-containing protein [Caldalkalibacillus thermarum TA2.A1]	7740000	1	0	0	0	1	0	0	0	0	0	1	0	0	0	1	0	0	0	0	9170000	1	0	0	13300000	2	4640000	1	20600000	2	7880000	2	0	0	0	0	0	0	0	0	1160000	1
801	QZT33853.1	heme-dependent peroxidase [Caldalkalibacillus thermarum TA2.A1]	8520000	1	0	0	0	0	0	0	6870000	1	0	0	13000000	2	0	0	41300000	3	18100000	2	0	0	0	0	0	0	0	0	66100000	3	27000000	3	0	0	0	0	0	0	0	0	1280000000	15
802	QZT33622.1	enoyl-CoA hydratase [Caldalkalibacillus thermarum TA2.A1]	1870000	1	5520000	1	4620000	2	3310000	2	0	0	0	0	0	0	2750000	2	7210000	2	0	1	0	0	3700000	1	14000000	2	9300000	2	354000	1	10900000	3	0	0	0	0	0	0	0	0	241000000	14
803	QZT35187.1	sodium:alanine symporter family protein [Caldalkalibacillus thermarum TA2.A1]	1960000	1	1710000	1	0	0	0	0	0	0	1870000	1	0	1	1140000	1	0	0	439000	1	0	0	0	0	0	0	0	0	0	0	0	0	0	0	0	0	0	0	0	0	2180000	1
804	QZT33364.1	TIM barrel protein [Caldalkalibacillus thermarum TA2.A1]	1150000	1	0	0	0	0	0	0	0	0	0	0	0	0	0	0	0	0	7430000	2	0	0	0	0	0	0	0	0	10900000	3	13000000	3	0	0	0	0	0	0	0	0	141000000	15
805	QZT34238.1	AMP-binding protein [Caldalkalibacillus thermarum TA2.A1]	1200000	1	0	0	4260000	1	3040000	1	0	0	0	0	2700000	1	2210000	1	0	0	0	0	15000000	3	4180000	2	14300000	3	4700000	2	21200000	4	21900000	5	0	0	0	0	0	0	1000000	1	325000000	31
806	QZT34604.1	IS200/IS605 family element transposase accessory protein TnpB [Caldalkalibacillus thermarum TA2.A1]	3220000	1	0	0	0	0	0	1	0	0	0	0	0	0	0	0	0	0	0	0	0	0	0	0	0	0	0	0	0	0	0	0	0	0	0	0	0	0	0	0	0	0
807	QZT33721.1	IS200/IS605 family element transposase accessory protein TnpB [Caldalkalibacillus thermarum TA2.A1]	3220000	1	0	0	0	0	0	1	0	0	0	0	0	0	0	0	0	0	0	0	0	0	0	0	0	0	0	0	0	0	0	0	0	0	0	0	0	0	0	0	0	0
808	QZT34882.1	IS200/IS605 family element transposase accessory protein TnpB [Caldalkalibacillus thermarum TA2.A1]	3220000	1	0	0	0	0	0	1	0	0	0	0	0	0	0	0	0	0	0	0	0	0	0	0	0	0	0	0	25000000	1	0	0	0	0	0	0	0	0	0	0	0	0
809	QZT32498.1	IS200/IS605 family element transposase accessory protein TnpB [Caldalkalibacillus thermarum TA2.A1]	3220000	1	0	0	0	0	0	1	0	0	0	0	0	0	0	0	0	0	0	0	0	0	0	0	0	0	0	0	25000000	1	0	0	0	0	0	0	0	0	0	0	0	0
810	QZT34849.1	IS200/IS605 family element transposase accessory protein TnpB [Caldalkalibacillus thermarum TA2.A1]	3220000	1	0	0	0	0	0	1	0	0	0	0	0	0	0	0	0	0	0	0	0	0	0	0	0	0	0	0	25000000	1	0	0	0	0	0	0	0	0	0	0	0	0
811	QZT34956.1	cytosolic protein [Caldalkalibacillus thermarum TA2.A1]	40300000	1	37000000	1	24900000	1	21300000	1	68600000	1	7910000	1	15500000	1	0	0	41900000	1	51200000	2	0	0	0	0	0	0	8250000	1	139000000	3	113000000	3	0	0	215000000	1	0	0	85300000	2	17600000	5
812	QZT34584.1	polyamine aminopropyltransferase [Caldalkalibacillus thermarum TA2.A1]	13400000	1	12000000	1	15100000	2	19300000	3	16800000	1	19100000	2	10100000	1	10400000	1	3210000	2	5240000	2	0	0	0	0	15500000	1	18200000	2	28700000	2	21800000	2	0	0	0	0	0	0	843000	1	621000000	16
813	QZT32660.1	TlyA family RNA methyltransferase [Caldalkalibacillus thermarum TA2.A1]	792000	1	0	0	0	0	252000	1	1170000	1	0	0	0	0	685000	1	0	0	0	0	7250000	1	0	0	0	0	0	0	12200000	1	9350000	1	0	0	0	0	0	0	0	0	0	0
814	QZT34011.1	recombination protein RecT [Caldalkalibacillus thermarum TA2.A1]	46500000	1	0	0	0	0	0	0	0	0	0	0	0	0	0	0	0	0	0	0	0	0	0	0	0	0	0	0	0	0	0	0	0	0	0	0	0	0	0	0	0	0
815	QZT33801.1	threonine-phosphate decarboxylase CobD [Caldalkalibacillus thermarum TA2.A1]	2070000	1	0	0	0	0	0	0	0	0	0	0	0	0	0	0	268000	1	0	0	0	0	0	0	0	0	0	0	9750000	1	8650000	2	2930000	1	0	0	0	0	0	0	22900000	7
816	QZT34104.1	Zn-dependent hydrolase [Caldalkalibacillus thermarum TA2.A1]	11400000	1	0	0	15900000	2	13800000	2	0	0	0	1	0	0	1890000	1	2970000	1	10500000	2	41600000	4	7380000	2	55200000	6	26300000	3	49600000	4	68100000	6	0	0	5250000	1	0	0	5470000	1	146000000	19
817	QZT35301.1	ABC transporter ATP-binding protein/permease [Caldalkalibacillus thermarum TA2.A1]	9340000	1	0	0	6330000	1	0	0	16000000	2	0	0	9730000	1	1760000	1	3190000	1	0	0	14400000	2	8490000	2	5020000	2	5860000	3	14600000	5	9180000	2	0	0	0	0	0	0	0	0	305000	1
818	QZT34865.1	ABC transporter permease [Caldalkalibacillus thermarum TA2.A1]	3570000	1	0	0	10700000	1	8390000	1	0	0	0	0	2510000	1	2090000	1	18600000	1	12900000	1	0	0	0	0	0	0	0	0	0	0	0	0	0	0	0	0	0	0	0	0	168000	1
819	QZT33487.1	tRNA guanosine(34) transglycosylase Tgt [Caldalkalibacillus thermarum TA2.A1]	2700000	1	3890000	2	9980000	2	9180000	2	5160000	3	0	0	8150000	3	10800000	3	7110000	3	8360000	3	4660000	3	5250000	1	15900000	5	14400000	5	12500000	3	3650000	3	0	0	0	0	0	0	0	0	45700000	11
820	QZT34611.1	5-(carboxyamino)imidazole ribonucleotide synthase [Caldalkalibacillus thermarum TA2.A1]	2780000	1	0	0	15500000	1	13800000	1	0	0	0	0	0	0	1930000	1	0	0	22100000	1	18500000	2	27600000	5	55600000	6	43600000	5	54500000	5	56400000	7	0	0	0	0	0	0	0	0	41500000	12
821	QZT33188.1	DUF3055 domain-containing protein [Caldalkalibacillus thermarum TA2.A1]	1710000	1	0	0	0	0	1800000	1	0	0	0	0	0	0	1350000	1	0	0	0	0	0	0	0	0	0	0	0	0	0	0	0	0	0	0	0	0	0	0	0	0	4780000	2
822	QZT35467.1	zinc-binding dehydrogenase [Caldalkalibacillus thermarum TA2.A1]	6440000	1	7870000	2	11900000	2	4570000	2	28400000	2	2250000	2	3290000	2	10500000	2	4510000	1	640000	1	22400000	1	13400000	1	6510000	1	45900000	4	19800000	2	11800000	3	0	0	0	0	0	0	0	0	1030000000	19
823	QZT33757.1	SUF system NifU family Fe-S cluster assembly protein [Caldalkalibacillus thermarum TA2.A1]	1170000	1	0	0	4200000	1	4840000	2	5220000	2	7690000	3	3370000	1	3130000	1	3660000	1	0	1	11600000	2	4700000	2	15000000	2	3670000	1	1820000	1	1510000	1	0	0	0	0	0	0	0	0	724000000	16
824	QZT35295.1	LLM class oxidoreductase [Caldalkalibacillus thermarum TA2.A1]	0	1	0	0	0	0	0	0	0	0	0	0	0	0	0	0	0	0	0	0	0	0	0	0	0	0	0	0	0	0	0	0	0	0	0	0	0	0	0	0	1270000000	19
825	QZT34422.1	50S ribosomal protein L23 [Caldalkalibacillus thermarum TA2.A1]	9400000	1	5660000	1	3140000	1	0	0	13500000	1	10100000	1	5840000	1	0	0	0	0	0	0	189000000	5	187000000	5	72000000	2	26400000	1	229000000	3	109000000	2	0	0	334000000	5	0	0	0	0	64700000	6
826	QZT34207.1	D-cysteine desulfhydrase family protein [Caldalkalibacillus thermarum TA2.A1]	1060000	1	2910000	2	5120000	1	0	0	0	0	0	1	0	0	0	0	0	0	2870000	1	0	0	870000	2	0	0	0	0	1630000	1	2530000	2	0	0	0	0	0	0	0	0	583000	1
827	QZT33491.1	crossover junction endodeoxyribonuclease RuvC [Caldalkalibacillus thermarum TA2.A1]	3850000	1	4900000	2	8880000	1	6180000	1	7250000	1	0	0	6340000	1	7920000	2	4300000	1	0	0	0	0	0	0	0	0	6690000	2	8120000	1	5520000	1	0	0	0	0	0	0	0	0	0	0
828	QZT32757.1	DNA topoisomerase IV subunit A [Caldalkalibacillus thermarum TA2.A1]	6590000	1	0	0	0	0	0	0	0	0	0	0	0	0	0	0	0	0	0	0	0	0	0	0	0	0	0	0	0	0	0	0	0	0	0	0	0	0	0	0	0	0
829	QZT34972.1	2-isopropylmalate synthase [Caldalkalibacillus thermarum TA2.A1]	1090000	1	3760000	2	5370000	1	14200000	2	1780000	1	0	0	1150000	1	3430000	2	14500000	2	11900000	1	0	0	0	0	0	0	5710000	2	0	0	0	0	0	0	0	0	0	0	0	0	140000000	22
830	QZT35082.1	metal ABC transporter substrate-binding protein [Caldalkalibacillus thermarum TA2.A1]	1240000	1	1330000	1	0	0	0	0	0	0	0	0	0	0	0	0	0	1	0	0	0	0	0	0	0	0	0	0	0	1	11900000	2	0	0	23200000	1	0	0	0	0	19400000	3
831	QZT34244.1	GNAT family N-acetyltransferase [Caldalkalibacillus thermarum TA2.A1]	925000	1	2920000	1	4880000	1	6270000	2	0	0	0	0	3920000	2	3290000	2	6220000	3	2010000	1	1070000	1	0	0	11700000	2	0	0	13000000	1	1000000	1	0	0	0	0	0	0	0	0	72200000	9
832	QZT33122.1	adenosylhomocysteinase [Caldalkalibacillus thermarum TA2.A1]	4240000	1	0	0	13100000	3	10900000	1	4950000	1	1550000	1	4320000	1	3220000	1	2320000	1	4350000	1	82000000	5	55700000	3	64200000	5	46600000	6	96400000	10	61800000	6	0	0	30100000	2	0	0	3360000	1	1180000000	30
833	QZT35400.1	L-serine ammonia-lyase iron-sulfur-dependent subunit alpha [Caldalkalibacillus thermarum TA2.A1]	8220000	1	0	0	13100000	1	12700000	1	0	0	0	0	0	0	6710000	1	0	0	6950000	1	12700000	2	0	0	1810000	1	0	1	8970000	2	7290000	1	0	0	0	0	0	0	0	0	4290000	6
834	QZT34607.1	RNA methyltransferase [Caldalkalibacillus thermarum TA2.A1]	3400000	1	0	0	0	0	0	0	0	0	0	0	0	0	0	0	0	0	0	0	0	0	0	0	0	1	0	0	1050000	2	0	1	0	0	0	0	0	0	0	0	7900000	2
835	QZT34366.1	hypoxanthine phosphoribosyltransferase [Caldalkalibacillus thermarum TA2.A1]	3720000	1	0	0	0	0	0	0	932000	1	0	0	10700000	1	2110000	2	2090000	1	0	0	639000	1	0	0	7130000	2	6320000	1	20100000	3	7760000	2	0	0	0	0	0	0	0	0	137000000	15
836	QZT35229.1	DUF1659 domain-containing protein [Caldalkalibacillus thermarum TA2.A1]	14700000	1	0	0	0	0	0	0	0	0	0	0	0	0	3170000	1	0	0	0	0	0	0	0	0	12600000	1	0	0	0	0	0	0	0	0	0	0	0	0	0	0	2380000	1
837	QZT33155.1	diaminopimelate decarboxylase [Caldalkalibacillus thermarum TA2.A1]	4200000	1	0	0	4600000	1	0	0	0	0	2110000	1	3980000	1	3250000	2	0	0	2990000	1	0	0	0	0	0	0	2570000	1	0	0	0	0	0	0	0	0	0	0	0	0	163000000	23
838	QZT32951.1	L-threonine 3-dehydrogenase [Caldalkalibacillus thermarum TA2.A1]	7510000	1	8100000	1	12200000	2	9980000	3	3580000	3	9310000	1	9220000	2	8220000	1	9140000	3	672000	1	2860000	1	3300000	1	0	0	0	0	0	0	4660000	1	0	0	0	0	0	0	0	0	12300000	7
839	QZT35514.1	LamB/YcsF family protein [Caldalkalibacillus thermarum TA2.A1]	10600000	1	0	0	11000000	1	9110000	1	0	0	0	0	6980000	1	6510000	1	8700000	1	0	0	14300000	1	12000000	2	35500000	4	32400000	4	28300000	3	17600000	2	0	0	0	0	0	0	0	0	4130000	3
840	QZT33221.1	AAA family ATPase [Caldalkalibacillus thermarum TA2.A1]	2670000	1	0	0	2930000	1	0	0	0	0	286000	1	0	0	0	0	0	0	1270000	1	0	0	0	0	0	0	0	0	0	0	2900000	2	0	0	0	0	0	0	0	0	0	0
841	QZT35025.1	AAA family ATPase [Caldalkalibacillus thermarum TA2.A1]	2670000	1	0	0	2930000	1	0	0	0	0	286000	1	0	0	0	0	0	0	1270000	1	0	0	0	0	0	0	0	0	0	0	2900000	2	0	0	0	0	0	0	0	0	0	0
842	QZT34106.1	AAA family ATPase [Caldalkalibacillus thermarum TA2.A1]	2670000	1	0	0	2930000	1	0	0	0	0	286000	1	0	0	0	0	0	0	1270000	1	0	0	0	0	0	0	0	0	0	0	2900000	2	0	0	0	0	0	0	0	0	0	0
843	QZT33647.1	AAA family ATPase [Caldalkalibacillus thermarum TA2.A1]	2670000	1	0	0	2930000	1	0	0	0	0	286000	1	0	0	0	0	0	0	1270000	1	0	0	0	0	0	0	0	0	0	0	2900000	2	0	0	0	0	0	0	0	0	0	0
844	QZT33002.1	chemotaxis protein CheW [Caldalkalibacillus thermarum TA2.A1]	15600000	1	0	0	0	0	0	0	0	0	9490000	1	0	0	0	0	13900000	1	6930000	1	39300000	3	15500000	1	31500000	3	16600000	2	40000000	2	0	0	0	0	0	0	0	0	0	0	2360000	1
845	QZT35322.1	CoA-binding protein [Caldalkalibacillus thermarum TA2.A1]	1220000	1	0	0	0	0	1970000	1	0	0	0	0	0	0	0	0	0	0	0	0	0	0	0	0	0	0	0	0	14500000	1	0	0	0	0	0	0	0	0	0	0	221000000	12
846	QZT33406.1	30S ribosomal protein S20 [Caldalkalibacillus thermarum TA2.A1]	7010000	1	0	0	0	0	0	0	24400000	2	0	0	5650000	1	0	0	9990000	1	0	0	25400000	1	0	0	0	0	22800000	1	55000000	1	97200000	2	0	0	46000000	2	24200000	2	0	0	12700000	2
847	QZT34072.1	Lrp/AsnC family transcriptional regulator [Caldalkalibacillus thermarum TA2.A1]	0	1	0	0	6960000	1	0	0	5410000	1	3580000	1	4080000	1	0	0	0	0	0	0	0	0	0	0	0	0	0	0	714000	1	0	0	0	0	0	0	0	0	0	0	12500000	6
848	QZT34268.1	CoA transferase subunit A [Caldalkalibacillus thermarum TA2.A1]	5460000	1	6440000	2	0	0	1770000	1	7070000	2	8840000	4	6910000	3	4990000	2	5790000	2	0	0	0	0	0	0	12800000	3	12100000	2	21800000	4	18900000	3	0	0	0	0	0	0	0	0	2090000	2
849	QZT34149.1	AbrB/MazE/SpoVT family DNA-binding domain-containing protein [Caldalkalibacillus thermarum TA2.A1]	8340000	1	0	0	3540000	1	2990000	1	3590000	1	0	0	3580000	1	3480000	1	0	0	0	0	0	0	0	0	0	0	0	0	5420000	1	4600000	1	0	0	0	0	0	0	0	0	6010000	1
850	QZT32805.1	50S ribosomal protein L28 [Caldalkalibacillus thermarum TA2.A1]	16100000	1	0	0	0	0	0	0	0	0	0	0	0	0	0	0	0	0	0	0	50700000	1	11400000	2	28300000	1	32900000	2	33200000	2	22600000	1	0	0	0	0	0	0	0	0	62500000	3
851	QZT32548.1	metalloregulator ArsR/SmtB family transcription factor [Caldalkalibacillus thermarum TA2.A1]	5110000	1	4680000	1	0	0	0	0	0	0	0	0	3280000	1	0	0	0	1	0	0	0	0	0	0	0	0	0	0	0	0	0	0	0	0	0	0	0	0	0	0	94000000	5
852	QZT34172.1	F0F1 ATP synthase subunit A [Caldalkalibacillus thermarum TA2.A1]	34800000	1	0	0	0	0	0	0	23900000	1	17100000	1	23500000	1	16700000	1	19800000	1	0	0	0	0	0	0	0	0	0	0	8330000	1	7530000	1	0	0	0	0	0	0	12200000	1	23900000	5
853	QZT34983.1	LacI family transcriptional regulator [Caldalkalibacillus thermarum TA2.A1]	1720000	1	0	0	1940000	1	0	0	0	0	0	0	0	0	0	0	0	0	0	0	0	0	0	0	0	0	0	0	0	0	0	0	0	0	0	0	0	0	0	0	21100000	8
854	QZT34832.1	cation acetate symporter [Caldalkalibacillus thermarum TA2.A1]	4000000	1	0	0	0	0	0	0	0	0	0	0	0	0	0	0	0	0	0	0	0	0	0	0	0	0	0	0	0	0	0	0	0	0	0	0	0	0	0	0	0	0
855	QZT35111.1	PLP-dependent aminotransferase family protein [Caldalkalibacillus thermarum TA2.A1]	0	1	2210000	2	4720000	1	4720000	1	886000	2	0	2	1500000	1	1630000	1	4290000	2	3360000	1	0	0	0	0	1480000	2	0	1	0	0	601000	1	0	0	0	0	0	0	0	0	0	0
856	QZT34303.1	LysR family transcriptional regulator [Caldalkalibacillus thermarum TA2.A1]	807000	1	0	0	0	0	0	1	0	0	0	0	0	0	0	0	1110000	1	0	0	0	0	0	0	0	1	0	0	3140000	1	2600000	2	0	0	0	0	0	0	0	0	6340000	5
857	QZT33197.1	N-acetyltransferase [Caldalkalibacillus thermarum TA2.A1]	6800000	1	0	0	0	0	0	0	6410000	2	33400000	1	8830000	2	0	0	16100000	1	0	0	37000000	2	8200000	1	44300000	3	39500000	3	77200000	5	40500000	3	0	0	0	0	0	0	0	0	27100000	8
858	QZT33803.1	adenosylcobinamide amidohydrolase [Caldalkalibacillus thermarum TA2.A1]	5550000	1	0	0	9870000	1	5910000	1	4620000	1	0	0	1560000	1	0	1	0	0	4550000	1	0	0	0	0	0	0	8300000	1	22000000	3	9580000	1	0	0	0	0	2060000	1	20500000	2	10400000	7
859	QZT34391.1	DNA repair protein RadA [Caldalkalibacillus thermarum TA2.A1]	2220000	1	6580000	1	8540000	2	8770000	2	0	1	9250000	3	0	0	2580000	1	1160000	1	1800000	2	9960000	1	12100000	2	2380000	1	1650000	1	19600000	3	9160000	2	0	0	0	0	0	0	0	0	1280000	3
860	QZT32914.1	sulfurtransferase TusA family protein [Caldalkalibacillus thermarum TA2.A1]	7880000	1	0	0	0	0	0	0	0	0	0	0	0	0	0	0	0	0	0	0	0	0	0	0	0	0	0	0	4750000	1	0	0	0	0	0	0	0	0	0	0	350000000	9
861	QZT33737.1	TIGR01457 family HAD-type hydrolase [Caldalkalibacillus thermarum TA2.A1]	1540000	1	0	0	0	0	0	0	2980000	2	0	0	4160000	1	0	0	0	1	0	0	2250000	1	13900000	1	31900000	3	14100000	3	13600000	1	11800000	2	0	0	0	0	0	0	0	0	152000000	15
862	QZT33290.1	DUF1128 domain-containing protein [Caldalkalibacillus thermarum TA2.A1]	560000	1	0	0	350000	1	0	0	0	0	0	0	0	0	246000	1	0	0	0	0	0	0	1880000	1	0	0	0	0	0	0	0	1	0	0	0	0	0	0	0	0	38500000	8
863	QZT33123.1	bacillithiol biosynthesis cysteine-adding enzyme BshC [Caldalkalibacillus thermarum TA2.A1]	0	1	0	0	0	0	2160000	1	2860000	1	1790000	1	0	0	0	0	0	0	0	0	0	0	0	0	0	0	0	0	0	0	0	0	0	0	0	0	0	0	0	0	31300000	13
864	QZT33178.1	pyridoxamine 5'-phosphate oxidase family protein [Caldalkalibacillus thermarum TA2.A1]	1720000	1	970000	1	2790000	1	0	0	0	0	0	0	0	0	0	0	0	0	23600000	2	0	0	0	0	0	0	0	0	17900000	2	6610000	1	0	0	6910000	2	0	0	0	0	490000000	9
865	QZT32776.1	aspartate carbamoyltransferase catalytic subunit [Caldalkalibacillus thermarum TA2.A1]	1990000	1	0	0	0	0	6730000	2	1530000	1	0	0	2810000	2	1140000	1	1570000	1	1760000	1	0	1	190000	1	0	0	0	0	0	0	0	0	0	0	0	0	0	0	0	0	0	0
866	QZT34624.1	helix-turn-helix domain-containing protein [Caldalkalibacillus thermarum TA2.A1]	919000	1	0	0	0	0	0	0	0	0	0	0	0	0	0	0	0	0	0	0	0	0	0	0	0	0	0	0	0	0	0	0	0	0	0	0	0	0	0	0	0	0
867	QZT33624.1	long-chain fatty acid--CoA ligase [Caldalkalibacillus thermarum TA2.A1]	0	0	14800000	3	18100000	3	21900000	6	7630000	2	0	0	12800000	2	14900000	4	12600000	3	6770000	2	0	0	0	0	4140000	1	3990000	2	10600000	2	12600000	3	0	0	0	0	0	0	0	0	2660000	5
868	QZT33356.1	4-hydroxy-3-methylbut-2-enyl diphosphate reductase [Caldalkalibacillus thermarum TA2.A1]	0	0	12400000	2	0	0	14100000	1	24600000	2	17700000	2	33000000	3	32300000	3	3070000	1	0	0	129000000	5	167000000	6	238000000	10	159000000	6	236000000	7	162000000	7	24300000	1	48500000	3	6050000	1	26300000	2	435000000	15
869	QZT33532.1	porphobilinogen synthase [Caldalkalibacillus thermarum TA2.A1]	0	0	4850000	2	22600000	3	18700000	1	7020000	3	2520000	1	11400000	2	7090000	1	44500000	2	31900000	2	0	0	0	0	1830000	1	0	0	48000000	6	26300000	4	0	0	7020000	1	0	0	0	0	569000000	24
870	QZT32987.1	PolC-type DNA polymerase III [Caldalkalibacillus thermarum TA2.A1]	0	0	1700000	1	1410000	1	0	0	0	0	0	0	1130000	1	1220000	3	0	0	473000	1	0	0	0	0	806000	1	2840000	2	3980000	3	3380000	2	0	0	0	0	0	0	0	0	1250000	4
871	QZT35172.1	metal-sensitive transcriptional regulator [Caldalkalibacillus thermarum TA2.A1]	0	0	4550000	2	0	0	0	0	2630000	1	3230000	2	7110000	2	5990000	1	0	0	0	0	0	0	0	0	1070000	1	11300000	2	0	0	27400000	2	0	0	37700000	2	0	0	0	0	4430000	3
872	QZT34344.1	pur operon repressor [Caldalkalibacillus thermarum TA2.A1]	0	0	3920000	1	5530000	1	0	0	0	0	0	0	3650000	1	3030000	1	20800000	1	21900000	1	760000	1	496000	1	0	0	0	0	0	0	0	0	0	0	0	0	0	0	0	0	40100000	9
873	QZT32801.1	16S rRNA (cytosine(967)-C(5))-methyltransferase RsmB [Caldalkalibacillus thermarum TA2.A1]	0	0	7990000	2	7130000	2	580000	1	590000	1	0	0	908000	1	648000	1	0	0	0	0	2350000	1	2150000	1	1530000	1	1930000	1	4120000	1	4060000	1	0	0	0	0	0	0	0	0	0	1
874	QZT34592.1	hypothetical protein HUR95_04300 [Caldalkalibacillus thermarum TA2.A1]	0	0	18100000	1	0	1	0	1	0	0	0	0	0	1	0	1	3250000	1	5540000	1	17900000	1	18000000	1	1400000	1	0	0	0	0	0	0	0	0	26400000	1	0	0	718000	1	896000	1
875	QZT34718.1	ATP-binding cassette domain-containing protein [Caldalkalibacillus thermarum TA2.A1]	0	0	11100000	3	11500000	2	0	1	0	0	0	0	6230000	2	2110000	2	1480000	2	21600000	1	0	0	5090000	2	888000	1	0	0	4630000	4	8400000	3	0	0	0	0	3650000	1	0	0	4350000	5
876	QZT35055.1	DUF948 domain-containing protein [Caldalkalibacillus thermarum TA2.A1]	0	0	35400000	2	0	0	0	0	0	0	22400000	1	4430000	1	0	0	26600000	1	0	0	143000000	3	120000000	2	95200000	2	201000000	5	272000000	3	275000000	4	59300000	1	93000000	2	45800000	1	160000000	3	11200000	3
877	QZT33977.1	hypothetical protein HUR95_00615 [Caldalkalibacillus thermarum TA2.A1]	0	0	2590000	1	2460000	1	0	0	2830000	1	0	0	2260000	1	1940000	1	0	0	0	0	0	0	0	0	0	0	449000	1	2730000	1	1850000	1	0	0	0	0	0	0	0	0	0	0
878	QZT33503.1	50S ribosomal protein L21 [Caldalkalibacillus thermarum TA2.A1]	0	0	20800000	1	15300000	1	0	0	24100000	2	0	0	0	0	0	1	13700000	1	12200000	1	347000000	2	369000000	2	293000000	2	281000000	2	387000000	2	299000000	2	0	0	489000000	3	0	0	0	0	135000000	5
879	QZT35394.1	flavodoxin-dependent (E)-4-hydroxy-3-methylbut-2-enyl-diphosphate synthase [Caldalkalibacillus thermarum TA2.A1]	0	0	18300000	1	29900000	3	14300000	2	3150000	1	3050000	1	8610000	1	7880000	2	23400000	4	36900000	4	53000000	6	13500000	2	22300000	3	26600000	3	51400000	6	10800000	3	0	0	0	0	0	0	0	0	190000000	20
880	QZT34271.1	BMC domain-containing protein [Caldalkalibacillus thermarum TA2.A1]	0	0	5220000	1	8830000	1	8170000	1	0	0	0	0	0	0	0	0	28000000	1	26700000	1	0	0	0	0	765000	1	814000	1	0	0	0	0	0	0	0	0	0	0	0	0	104000000	4
881	QZT34550.1	rhomboid family intramembrane serine protease [Caldalkalibacillus thermarum TA2.A1]	0	0	8900000	1	8410000	1	7790000	1	0	1	0	0	8610000	1	8000000	1	0	0	0	0	0	0	0	0	0	0	0	0	9460000	1	0	0	0	0	0	0	0	0	0	0	757000	1
882	QZT34288.1	nucleoid occlusion protein [Caldalkalibacillus thermarum TA2.A1]	0	0	20200000	2	0	0	0	0	29200000	3	2780000	1	19000000	2	9610000	2	0	0	5010000	1	147000000	6	161000000	7	191000000	9	264000000	7	337000000	5	357000000	7	0	0	281000000	3	0	0	75600000	2	68100000	12
883	QZT33163.1	pyrimidine-nucleoside phosphorylase [Caldalkalibacillus thermarum TA2.A1]	0	0	2790000	1	14000000	2	10600000	2	0	0	772000	1	5870000	1	4050000	2	2620000	1	1800000	1	0	0	0	0	5050000	2	0	1	5220000	3	35500000	5	0	0	0	0	0	0	0	0	184000000	20
884	QZT34399.1	cysteine--tRNA ligase [Caldalkalibacillus thermarum TA2.A1]	0	0	17100000	2	5360000	1	11400000	2	38600000	4	35000000	3	15300000	2	17800000	1	6920000	1	3020000	1	22000000	2	21100000	2	41800000	5	19500000	2	50800000	6	36600000	6	0	0	0	0	0	0	0	0	346000000	28
885	QZT34993.1	cell division protein ZapA [Caldalkalibacillus thermarum TA2.A1]	0	0	4040000	1	5020000	1	3710000	1	0	1	3080000	1	0	0	3300000	1	2120000	1	5600000	1	0	0	0	0	2720000	1	3780000	1	7250000	1	5990000	1	0	0	15500000	2	0	0	2820000	1	25300000	4
886	QZT33098.1	YggS family pyridoxal phosphate-dependent enzyme [Caldalkalibacillus thermarum TA2.A1]	0	0	9600000	2	4120000	2	1310000	1	0	0	8330000	1	10400000	2	8450000	2	12000000	2	0	0	0	0	0	0	0	0	0	0	0	0	402000	1	0	0	0	0	0	0	0	0	112000000	8
887	QZT32813.1	ACP S-malonyltransferase [Caldalkalibacillus thermarum TA2.A1]	0	0	18100000	2	6280000	2	4880000	3	34000000	2	30600000	3	28000000	3	33000000	4	48300000	4	692000	1	0	0	0	0	4260000	1	3710000	1	29800000	1	28500000	2	0	0	0	0	0	0	17300000	3	221000000	10
888	QZT32557.1	phospholipid methyltransferase [Caldalkalibacillus thermarum TA2.A1]	0	0	5020000	1	0	0	0	0	0	0	0	0	0	0	0	0	0	0	0	0	0	0	0	0	0	0	1670000	1	2720000	1	0	0	0	0	0	0	0	0	0	0	0	0
889	QZT32788.1	carboxypeptidase M32 [Caldalkalibacillus thermarum TA2.A1]	0	0	3220000	1	0	0	0	0	5510000	2	2240000	1	8730000	3	4850000	1	5260000	1	6220000	2	1550000	1	1400000	1	28700000	4	1020000	1	29100000	4	18900000	4	3020000	1	0	0	0	0	2870000	1	585000000	33
890	QZT32631.1	ribosome biogenesis GTPase Der [Caldalkalibacillus thermarum TA2.A1]	0	0	1690000	1	2540000	1	2640000	2	1910000	1	0	0	3390000	1	3460000	3	1400000	2	0	0	7060000	1	0	0	0	0	6050000	1	0	0	390000	1	0	0	0	0	0	0	0	0	4940000	7
891	QZT34533.1	energy-coupling factor ABC transporter ATP-binding protein [Caldalkalibacillus thermarum TA2.A1]	0	0	4150000	1	5390000	1	4860000	1	419000	1	0	0	0	0	0	0	3110000	1	2730000	1	2270000	1	5000000	2	8620000	1	8080000	2	29500000	3	15400000	3	0	0	0	0	0	0	6060000	1	841000	3
892	QZT33408.1	zf-HC2 domain-containing protein [Caldalkalibacillus thermarum TA2.A1]	0	0	3790000	1	2660000	1	0	0	0	0	0	0	8640000	3	0	0	2330000	1	6890000	2	12600000	1	0	0	0	0	0	0	18200000	3	1640000	2	2790000	1	0	0	0	0	0	0	407000	2
893	QZT34462.1	TRAP transporter substrate-binding protein [Caldalkalibacillus thermarum TA2.A1]	0	0	7120000	1	0	0	0	0	0	0	0	0	7540000	1	0	0	6020000	1	0	1	0	0	0	0	5920000	2	0	0	2610000	1	0	1	0	0	0	0	0	1	0	0	725000	1
894	QZT33733.1	bifunctional cystathionine gamma-lyase/homocysteine desulfhydrase [Caldalkalibacillus thermarum TA2.A1]	0	0	7740000	1	12000000	2	10800000	2	0	0	6330000	1	1140000	1	5300000	1	1780000	1	6380000	1	0	0	0	0	0	0	0	0	0	0	0	0	0	0	0	0	0	0	0	0	443000000	24
895	QZT35402.1	conserved virulence factor C family protein [Caldalkalibacillus thermarum TA2.A1]	0	0	9020000	1	1720000	1	9440000	2	0	1	1780000	1	8120000	1	0	0	9920000	1	7010000	1	37700000	4	35100000	5	19900000	4	16600000	3	2840000	1	3950000	2	0	0	0	0	0	0	0	0	176000000	20
896	QZT34368.1	type III pantothenate kinase [Caldalkalibacillus thermarum TA2.A1]	0	0	2480000	1	0	0	0	0	5180000	1	0	0	0	0	0	0	5100000	1	3700000	1	0	0	0	0	2280000	1	2130000	1	0	0	0	0	0	0	0	0	0	0	0	0	180000000	10
897	QZT35266.1	TatD family hydrolase [Caldalkalibacillus thermarum TA2.A1]	0	0	3120000	1	3300000	1	2660000	1	3090000	1	2670000	1	3880000	2	0	0	6710000	2	0	0	0	0	0	0	4440000	1	4990000	1	346000	1	0	0	0	0	0	0	0	0	0	0	150000000	13
898	QZT33407.1	DNA polymerase III subunit delta [Caldalkalibacillus thermarum TA2.A1]	0	0	5210000	1	16700000	3	14400000	3	0	0	0	0	4710000	1	3150000	1	16200000	2	0	0	0	0	0	0	0	0	0	0	1050000	1	942000	1	0	0	0	0	0	0	0	0	289000	1
899	QZT35153.1	hypothetical protein HUR95_08070 [Caldalkalibacillus thermarum TA2.A1]	0	0	2170000	1	0	0	0	0	792000	1	714000	1	0	0	0	0	0	0	0	0	0	0	0	0	0	0	0	0	0	0	0	0	705000	1	0	0	0	0	0	0	0	0
900	QZT35262.1	aminotransferase class V-fold PLP-dependent enzyme [Caldalkalibacillus thermarum TA2.A1]	0	0	5220000	2	8300000	1	0	0	0	0	783000	1	4380000	1	0	0	7330000	1	6090000	1	0	0	0	0	0	0	0	0	0	0	0	0	0	0	0	0	0	0	0	0	54500000	13
901	QZT33131.1	enoyl-CoA hydratase/isomerase family protein [Caldalkalibacillus thermarum TA2.A1]	0	0	2100000	1	10800000	1	9390000	1	0	0	0	0	0	0	0	0	9900000	1	9100000	1	0	0	0	0	0	0	0	0	0	0	1630000	1	0	0	0	0	0	0	0	0	334000	1
902	QZT32964.1	insulinase family protein [Caldalkalibacillus thermarum TA2.A1]	0	0	0	1	3450000	2	1810000	1	3700000	2	0	0	2000000	1	1900000	2	2950000	1	1170000	1	3840000	1	0	0	11000000	2	4460000	3	3590000	1	0	0	0	0	0	0	0	0	0	0	5890000	6
903	QZT35276.1	phenylacetic acid degradation operon negative regulatory protein PaaX [Caldalkalibacillus thermarum TA2.A1]	0	0	3530000	2	0	0	2090000	1	1810000	1	3810000	2	0	0	1500000	1	3050000	1	0	0	0	0	17000000	2	8010000	2	19100000	2	69300000	3	28400000	4	0	0	0	0	0	0	2590000	1	24800000	8
904	QZT32779.1	carbamoyl-phosphate synthase large subunit [Caldalkalibacillus thermarum TA2.A1]	0	0	526000	1	1300000	1	0	0	0	0	295000	1	0	0	0	0	1020000	1	0	0	0	0	0	0	1370000	1	0	0	3630000	2	3650000	4	0	0	0	0	0	0	0	0	0	0
905	QZT34606.1	uracil-DNA glycosylase [Caldalkalibacillus thermarum TA2.A1]	0	0	2180000	1	4020000	1	4360000	2	6810000	3	2450000	1	0	0	3280000	2	1940000	2	721000	1	0	0	0	0	0	0	0	0	0	0	0	0	0	0	0	0	0	0	0	0	822000	2
906	QZT34617.1	phosphoribosylformylglycinamidine cyclo-ligase [Caldalkalibacillus thermarum TA2.A1]	0	0	5100000	1	5560000	2	9570000	2	0	0	0	0	1610000	1	7970000	2	16300000	3	0	0	1420000	2	13800000	2	24400000	2	624000	1	28900000	4	39300000	5	0	0	0	0	0	0	0	0	19900000	9
907	QZT35123.1	hypothetical protein HUR95_07870 [Caldalkalibacillus thermarum TA2.A1]	0	0	8970000	1	0	0	0	0	0	0	0	0	0	0	0	0	14500000	1	0	0	0	0	0	0	0	0	0	0	32800000	3	0	0	0	0	0	0	0	0	0	0	7430000	1
908	QZT32500.1	DUF1446 domain-containing protein [Caldalkalibacillus thermarum TA2.A1]	0	0	10600000	1	16800000	2	15100000	2	13200000	3	4650000	2	9170000	1	8660000	1	9630000	1	0	0	14100000	2	13800000	2	3870000	2	2080000	2	9650000	4	8780000	4	0	0	0	0	2280000	1	0	0	7440000	10
909	QZT33387.1	4Fe-4S dicluster domain-containing protein [Caldalkalibacillus thermarum TA2.A1]	0	0	1540000	1	1700000	1	0	0	0	0	0	0	0	0	0	0	0	0	0	0	9250000	1	757000	1	0	0	10400000	1	26100000	2	15300000	1	0	0	0	0	0	0	0	0	0	0
910	QZT35512.1	RNA polymerase sigma-I factor [Caldalkalibacillus thermarum TA2.A1]	0	0	1510000	1	0	0	0	0	0	0	0	1	0	0	4370000	2	0	0	0	0	0	0	0	0	0	0	0	0	0	0	0	0	0	0	0	0	0	0	0	0	0	0
911	QZT32486.1	M20 peptidase aminoacylase family protein [Caldalkalibacillus thermarum TA2.A1]	0	0	3860000	1	6270000	1	5670000	1	0	0	0	0	4240000	1	4180000	1	4270000	1	2690000	1	0	0	0	0	5230000	1	4430000	1	13900000	3	5780000	1	0	0	0	0	0	0	0	0	205000000	15
912	QZT35403.1	2-succinyl-5-enolpyruvyl-6-hydroxy-3-cyclohexene-1-carboxylic-acid synthase [Caldalkalibacillus thermarum TA2.A1]	0	0	382000	1	516000	1	519000	1	0	0	0	0	362000	1	0	0	0	0	587000	1	0	0	0	0	1250000	1	2210000	1	0	0	0	0	0	0	0	0	0	0	0	0	774000	4
913	QZT33151.1	bifunctional 3 4-dihydroxy-2-butanone-4-phosphate synthase/GTP cyclohydrolase II [Caldalkalibacillus thermarum TA2.A1]	0	0	17500000	1	19200000	1	12700000	1	3480000	1	0	0	0	0	0	0	27400000	1	734000	1	0	1	9050000	4	63900000	5	73200000	6	60000000	5	42500000	2	0	0	0	0	0	0	9550000	2	502000000	25
914	QZT34531.1	DUF445 family protein [Caldalkalibacillus thermarum TA2.A1]	0	0	1490000	1	507000	1	0	0	0	0	0	0	0	0	0	0	0	0	0	0	0	0	0	0	0	0	0	0	0	0	0	0	0	0	0	0	0	0	0	0	0	0
915	QZT32625.1	30S ribosomal protein S1 [Caldalkalibacillus thermarum TA2.A1]	0	0	1960000	1	1150000	1	1020000	1	0	0	0	0	1380000	1	1440000	1	0	0	694000	1	0	0	17800000	2	0	0	5250000	1	12300000	2	8210000	1	0	0	0	0	0	0	0	0	572000000	28
916	QZT34332.1	stage 0 sporulation family protein [Caldalkalibacillus thermarum TA2.A1]	0	0	6930000	1	0	0	287000	1	18600000	1	24600000	2	2980000	1	5700000	2	5090000	1	982000	1	49500000	5	36000000	5	54900000	5	25100000	3	96800000	7	75500000	5	63800000	4	24200000	3	23100000	1	25600000	2	19800000	12
917	QZT34973.1	3-isopropylmalate dehydrogenase [Caldalkalibacillus thermarum TA2.A1]	0	0	1210000	1	0	0	0	0	3380000	2	1420000	1	2080000	1	0	0	2380000	1	0	0	0	0	2600000	1	2350000	2	2770000	1	0	0	4380000	2	0	0	0	0	0	0	0	0	845000000	25
918	QZT34181.1	ribose 5-phosphate isomerase B [Caldalkalibacillus thermarum TA2.A1]	0	0	6810000	1	3850000	1	0	0	5760000	1	8390000	2	8370000	1	0	0	4240000	1	4990000	1	0	0	1720000	1	11600000	3	10500000	2	12900000	2	1160000	1	0	0	0	0	0	0	11000000	2	292000000	8
919	QZT33027.1	ATP-dependent protease ATPase subunit HslU [Caldalkalibacillus thermarum TA2.A1]	0	0	2390000	1	0	0	4790000	1	8030000	3	2720000	1	4640000	1	4930000	2	6000000	1	9150000	2	41600000	6	34500000	7	45600000	7	42500000	7	99500000	10	45600000	8	0	0	25900000	2	0	0	0	0	257000000	27
920	QZT33121.1	division/cell wall cluster transcriptional repressor MraZ [Caldalkalibacillus thermarum TA2.A1]	0	0	0	1	0	0	0	0	0	0	0	0	0	1	0	0	0	0	0	0	0	0	0	0	0	0	0	0	0	0	0	0	0	0	0	0	0	0	0	0	1840000	1
921	QZT34488.1	1 2-phenylacetyl-CoA epoxidase subunit B [Caldalkalibacillus thermarum TA2.A1]	0	0	3470000	1	0	0	0	0	0	0	0	0	0	0	0	0	0	0	0	0	0	0	0	0	2290000	1	0	0	9970000	2	2730000	1	2490000	1	0	0	672000	1	0	0	721000	1
922	QZT32748.1	hypothetical protein HUR95_10165 [Caldalkalibacillus thermarum TA2.A1]	0	0	1130000	1	972000	1	0	0	0	0	0	0	1510000	1	1010000	1	0	0	0	0	0	0	0	0	0	0	0	0	0	0	0	0	0	0	0	0	0	0	0	0	0	0
923	QZT35272.1	glutamate--tRNA ligase [Caldalkalibacillus thermarum TA2.A1]	0	0	16100000	1	21800000	2	0	0	11300000	1	0	0	23700000	2	0	0	20700000	3	0	0	0	0	0	0	15600000	3	4670000	2	54700000	5	67300000	5	29700000	3	26700000	4	0	0	0	0	684000000	24
924	QZT32678.1	methylmalonyl-CoA epimerase [Caldalkalibacillus thermarum TA2.A1]	0	0	605000	1	0	0	0	0	0	0	0	0	0	0	0	0	0	0	0	0	4940000	1	0	0	0	1	1730000	2	0	0	0	0	0	0	0	0	0	0	0	0	17600000	10
925	QZT33768.1	5-oxoprolinase subunit PxpB [Caldalkalibacillus thermarum TA2.A1]	0	0	2950000	1	2240000	1	2090000	1	0	0	0	0	1910000	1	1540000	1	1690000	1	0	0	0	0	0	0	0	0	0	0	7260000	2	3050000	1	0	0	0	0	0	0	0	0	0	0
926	QZT35468.1	nodulation protein NfeD [Caldalkalibacillus thermarum TA2.A1]	0	0	19000000	1	0	0	0	0	0	0	10300000	1	0	0	14500000	1	0	0	35000000	1	0	0	0	0	0	0	0	0	70800000	2	29200000	1	0	0	105000000	2	0	0	0	0	22700000	3
927	QZT32587.1	L-seryl-tRNA(Sec) selenium transferase [Caldalkalibacillus thermarum TA2.A1]	0	0	9360000	1	1000000	1	0	0	0	0	1210000	1	11200000	2	879000	1	7710000	1	3730000	1	0	0	2610000	1	2180000	1	23800000	2	82700000	8	41600000	6	0	0	0	0	0	0	0	0	25700000	16
928	QZT32739.1	biotin--[acetyl-CoA-carboxylase] ligase [Caldalkalibacillus thermarum TA2.A1]	0	0	3270000	1	0	0	0	0	0	0	0	0	0	0	0	0	0	0	0	0	9010000	1	0	0	8530000	1	0	0	10300000	2	9940000	2	0	0	0	0	0	0	0	0	367000	2
929	QZT34365.1	tRNA lysidine(34) synthetase TilS [Caldalkalibacillus thermarum TA2.A1]	0	0	562000	1	0	1	0	0	0	0	0	0	0	0	0	0	0	0	0	0	0	0	537000	1	1290000	1	0	0	153000000	1	0	0	0	0	0	0	0	0	0	0	54800	1
930	QZT34952.1	DNA-formamidopyrimidine glycosylase [Caldalkalibacillus thermarum TA2.A1]	0	0	654000	1	0	0	0	1	879000	1	0	0	0	0	0	0	0	0	0	0	0	0	0	0	0	0	0	0	0	0	0	0	0	0	0	0	0	0	0	0	0	0
931	QZT32965.1	insulinase family protein [Caldalkalibacillus thermarum TA2.A1]	0	0	2650000	1	9580000	2	552000	1	0	0	0	0	2210000	1	0	0	3510000	1	0	0	0	0	0	0	565000	1	0	0	19100000	3	20700000	4	0	0	0	0	0	0	0	0	13700000	10
932	QZT32729.1	ubiquinol-cytochrome c reductase iron-sulfur subunit [Caldalkalibacillus thermarum TA2.A1]	0	0	4960000	1	5640000	1	5290000	1	3570000	1	0	0	7310000	1	6090000	1	40100000	2	0	0	0	1	0	0	0	0	0	0	0	1	512000	1	544000000	7	985000000	2	271000000	2	323000000	1	144000000	5
933	QZT33148.1	SMC-Scp complex subunit ScpB [Caldalkalibacillus thermarum TA2.A1]	0	0	0	1	0	0	0	0	18900000	1	0	1	4350000	1	15700000	1	0	0	0	0	0	0	0	0	0	0	0	0	0	0	0	0	0	0	0	0	0	0	0	0	1340000	1
934	QZT33089.1	MurR/RpiR family transcriptional regulator [Caldalkalibacillus thermarum TA2.A1]	0	0	1680000	1	8790000	2	23500000	2	10900000	1	9630000	1	0	1	13800000	1	18000000	2	11500000	2	0	1	0	1	0	0	0	0	0	0	0	0	0	0	0	0	0	0	0	0	15500000	8
935	QZT33272.1	6-carboxytetrahydropterin synthase [Caldalkalibacillus thermarum TA2.A1]	0	0	0	1	0	0	0	0	0	0	0	0	0	0	0	0	0	0	0	0	0	0	0	0	0	0	0	0	0	0	0	0	0	0	0	0	0	0	0	0	88700000	6
936	QZT33031.1	DNA-processing protein DprA [Caldalkalibacillus thermarum TA2.A1]	0	0	3450000	1	0	0	2690000	1	0	0	0	0	0	0	0	0	0	0	1250000	1	0	0	0	0	0	0	0	0	0	0	0	0	0	0	0	0	0	0	0	0	0	0
937	QZT33200.1	iron-sulfur cluster repair di-iron protein [Caldalkalibacillus thermarum TA2.A1]	0	0	2310000	1	0	0	0	0	0	0	2010000	1	0	0	871000	1	2640000	2	0	0	4370000	1	4240000	1	6730000	2	2930000	1	0	0	2170000	1	0	0	0	0	0	0	0	0	447000	1
938	QZT35368.1	potassium/proton antiporter [Caldalkalibacillus thermarum TA2.A1]	0	0	1790000	1	3150000	1	2190000	1	3070000	1	2410000	1	3070000	1	1760000	1	0	0	419000	1	0	0	0	0	0	0	0	0	0	0	0	0	0	0	0	0	0	0	0	0	0	0
939	QZT35087.1	TIGR03943 family protein [Caldalkalibacillus thermarum TA2.A1]	0	0	4600000	1	0	0	1130000	1	954000	1	432000	1	0	0	478000	1	0	0	0	0	0	0	0	0	0	0	0	0	0	0	3610000	1	0	0	0	0	0	0	8990000	1	0	0
940	QZT33278.1	hypothetical protein HUR95_13430 [Caldalkalibacillus thermarum TA2.A1]	0	0	7090000	1	1630000	1	0	0	2000000	1	1730000	1	5510000	2	0	0	0	1	0	0	0	0	0	0	0	0	0	0	1560000	1	0	0	0	0	0	0	0	0	0	0	17900000	6
941	QZT33750.1	bifunctional metallophosphatase/5'-nucleotidase [Caldalkalibacillus thermarum TA2.A1]	0	0	2210000	1	0	0	1950000	1	0	0	0	0	0	0	906000	1	5040000	1	4880000	1	0	0	0	0	0	0	0	0	14800000	3	5170000	1	0	0	0	0	0	0	0	0	5760000	7
942	QZT32846.1	type 1 glutamine amidotransferase [Caldalkalibacillus thermarum TA2.A1]	0	0	2800000	1	14100000	1	11600000	1	0	0	0	0	2640000	1	0	0	50000000	2	0	0	0	0	0	0	1300000	1	11000000	1	2980000	1	0	0	0	0	0	0	0	0	0	0	331000000	13
943	QZT34995.1	selenide water dikinase SelD [Caldalkalibacillus thermarum TA2.A1]	0	0	970000	1	0	0	0	0	0	0	0	0	0	0	0	0	0	0	0	0	14700000	1	17800000	2	8050000	1	11600000	1	7950000	1	0	0	0	0	0	0	0	0	0	0	71200000	12
944	QZT33354.1	hypothetical protein HUR95_14005 [Caldalkalibacillus thermarum TA2.A1]	0	0	13200000	1	577000	1	0	0	1370000	1	5460000	1	10500000	1	9180000	1	8920000	1	0	0	0	0	0	0	0	0	0	0	0	0	0	0	0	0	0	0	0	0	0	0	169000	1
945	QZT34130.1	amidohydrolase [Caldalkalibacillus thermarum TA2.A1]	0	0	2680000	1	4100000	2	1650000	3	0	0	3240000	1	0	0	1870000	1	1870000	1	0	0	1890000	1	0	0	0	0	0	0	0	0	0	0	0	0	0	0	0	0	0	0	25600000	8
946	QZT33559.1	SDR family oxidoreductase [Caldalkalibacillus thermarum TA2.A1]	0	0	1100000	1	4190000	2	2560000	2	0	0	0	0	1110000	1	620000	1	2940000	1	2260000	1	0	0	0	0	0	0	1080000	1	2330000	1	2240000	1	0	0	0	0	0	0	0	0	0	0
947	QZT32521.1	dicarboxylate/amino acid:cation symporter [Caldalkalibacillus thermarum TA2.A1]	0	0	2380000	1	5060000	1	3910000	1	0	0	0	0	0	0	1130000	1	3800000	1	0	0	0	0	0	0	0	0	0	0	0	0	0	0	0	1	0	0	0	0	0	0	1140000	2
948	QZT33558.1	enoyl-CoA hydratase/isomerase family protein [Caldalkalibacillus thermarum TA2.A1]	0	0	648000	1	0	0	0	0	0	0	0	0	1310000	1	1040000	1	0	0	0	0	0	0	0	0	0	0	0	0	0	0	0	0	0	0	0	0	0	0	0	0	0	0
949	QZT32887.1	nitronate monooxygenase [Caldalkalibacillus thermarum TA2.A1]	0	0	3370000	1	6710000	2	5400000	2	3260000	1	3250000	1	5100000	3	1660000	1	5780000	3	0	0	1350000	1	11700000	1	11300000	1	7810000	1	7940000	1	6350000	1	0	0	0	0	0	0	0	0	1080000	3
950	QZT35164.1	4-hydroxythreonine-4-phosphate dehydrogenase PdxA [Caldalkalibacillus thermarum TA2.A1]	0	0	965000	1	2180000	2	2090000	2	0	0	1090000	2	0	0	782000	2	0	0	0	0	0	0	0	0	1600000	1	1820000	1	4360000	2	6940000	2	0	0	0	0	0	0	0	0	78600000	8
951	QZT34376.1	2-amino-4-hydroxy-6-hydroxymethyldihydropteridine diphosphokinase [Caldalkalibacillus thermarum TA2.A1]	0	0	4770000	1	7230000	1	0	0	4590000	1	3650000	1	6640000	1	3650000	1	5170000	1	3450000	1	0	0	4970000	2	9070000	1	1930000	1	10700000	1	0	0	0	0	0	0	0	0	0	0	507000	2
952	QZT33333.1	TrkA family potassium uptake protein [Caldalkalibacillus thermarum TA2.A1]	0	0	5070000	1	2870000	1	6320000	2	4530000	2	3630000	2	3510000	1	593000	1	0	0	0	0	9880000	2	5250000	1	5740000	1	10200000	2	15800000	4	15200000	3	0	0	2460000	1	0	0	1600000	1	8630000	7
953	QZT34943.1	acyl-CoA thioesterase [Caldalkalibacillus thermarum TA2.A1]	0	0	942000	1	1380000	1	4870000	2	0	0	562000	1	812000	2	430000	1	2510000	1	3080000	2	0	0	0	0	5230000	1	0	0	16500000	2	23400000	4	7390000	1	0	0	0	0	0	0	148000000	7
954	QZT32989.1	RIP metalloprotease RseP [Caldalkalibacillus thermarum TA2.A1]	0	0	2080000	1	0	0	1760000	1	0	0	0	0	0	0	0	0	8720000	1	0	0	0	0	0	0	0	0	0	0	0	0	0	0	0	0	0	0	0	0	0	0	0	1
955	QZT33792.1	electron transfer flavoprotein subunit alpha/FixB family protein [Caldalkalibacillus thermarum TA2.A1]	0	0	3530000	1	2370000	1	2100000	1	2070000	1	1900000	1	0	0	1890000	1	0	0	0	0	0	0	2140000	1	2330000	1	934000	1	0	0	0	0	0	0	0	0	0	0	0	0	0	0
956	QZT34912.1	SDR family oxidoreductase [Caldalkalibacillus thermarum TA2.A1]	0	0	1450000	1	2290000	2	1480000	2	2780000	1	3150000	2	492000	1	1490000	2	2750000	2	5870000	1	944000	1	1140000	1	5660000	2	3370000	1	0	0	3590000	1	0	0	0	0	0	0	0	0	248000000	17
957	QZT33285.1	oxygen-insensitive NADPH nitroreductase [Caldalkalibacillus thermarum TA2.A1]	0	0	2260000	1	6900000	1	5600000	1	0	0	0	0	4910000	1	0	0	7000000	1	144000	2	4030000	1	0	0	0	1	0	0	14700000	3	13800000	5	0	0	7820000	1	0	0	0	0	275000000	22
958	QZT33938.1	chemotaxis protein CheW [Caldalkalibacillus thermarum TA2.A1]	0	0	6530000	1	0	0	3470000	1	0	0	0	0	5540000	1	3550000	1	20000000	2	15700000	1	0	0	3660000	1	0	0	0	0	0	0	0	0	0	0	0	0	0	0	7780000	3	15000000	4
959	QZT35252.1	lytic transglycosylase domain-containing protein [Caldalkalibacillus thermarum TA2.A1]	0	0	727000	1	0	0	0	0	0	0	0	0	0	0	0	0	743000	1	2370000	1	0	0	0	0	0	0	0	0	0	0	0	0	0	0	0	0	0	0	0	0	0	0
960	QZT33504.1	Rne/Rng family ribonuclease [Caldalkalibacillus thermarum TA2.A1]	0	0	941000	1	0	0	0	0	2020000	2	503000	1	0	0	0	0	690000	1	0	0	0	0	0	0	0	0	0	0	0	0	0	0	0	0	0	0	0	0	0	0	19500000	13
961	QZT34473.1	enoyl-CoA hydratase/isomerase family protein [Caldalkalibacillus thermarum TA2.A1]	0	0	0	1	0	0	0	0	0	0	0	0	0	0	0	0	0	0	0	0	0	0	0	0	3850000	1	0	0	3500000	1	0	0	0	0	0	0	0	0	0	0	6410000	4
962	QZT35298.1	23S rRNA (uracil(1939)-C(5))-methyltransferase RlmD [Caldalkalibacillus thermarum TA2.A1]	0	0	3260000	1	0	0	0	0	0	0	0	0	0	0	0	0	7550000	2	3000000	1	0	0	95300	1	0	0	0	0	895000	1	0	0	0	0	0	0	0	0	0	0	0	0
963	QZT32959.1	CDP-diacylglycerol--glycerol-3-phosphate 3-phosphatidyltransferase [Caldalkalibacillus thermarum TA2.A1]	0	0	6000000	1	0	0	0	0	14200000	1	0	0	0	0	7050000	1	0	0	0	0	0	0	0	0	0	0	0	0	0	0	0	0	0	0	0	0	0	0	0	0	0	0
964	QZT33283.1	radical SAM/CxCxxxxC motif protein YfkAB [Caldalkalibacillus thermarum TA2.A1]	0	0	0	1	0	0	0	0	0	0	0	0	0	0	163000	1	15100000	1	12100000	1	0	0	0	0	623000	1	0	0	4110000	1	4250000	2	0	0	0	0	0	0	0	0	256000	2
965	QZT33536.1	glutamyl-tRNA reductase [Caldalkalibacillus thermarum TA2.A1]	0	0	785000	1	0	0	0	0	0	0	0	0	0	0	0	0	0	0	0	0	0	0	3540000	1	0	0	0	0	2580000	1	0	0	0	0	0	0	0	0	0	0	70200	1
966	QZT33118.1	PASTA domain-containing protein [Caldalkalibacillus thermarum TA2.A1]	0	0	982000	1	0	0	0	0	0	0	0	0	0	0	0	0	0	0	0	0	0	0	0	0	0	0	0	0	0	0	0	0	0	0	0	0	0	0	0	0	0	0
967	QZT32865.1	(S)-benzoin forming benzil reductase [Caldalkalibacillus thermarum TA2.A1]	0	0	1680000	1	0	0	0	0	0	0	0	0	0	0	343000	1	0	0	0	0	25000000	4	14900000	4	24200000	4	27700000	6	46700000	5	18300000	2	0	0	3770000	1	0	0	0	0	329000000	21
968	QZT35089.1	hypothetical protein HUR95_07655 [Caldalkalibacillus thermarum TA2.A1]	0	0	730000	1	0	0	0	0	0	0	0	0	0	0	0	0	0	0	0	0	0	0	0	0	20600000	2	14300000	2	27000000	1	10500000	1	0	0	0	0	0	0	0	0	0	0
969	QZT33894.1	transposase [Caldalkalibacillus thermarum TA2.A1]	0	0	283000	1	0	0	0	0	0	0	0	0	0	0	0	0	0	0	0	0	0	0	0	0	0	0	0	0	0	0	0	0	0	0	0	0	0	0	0	0	0	0
970	QZT34581.1	ribosomal protein S18-alanine N-acetyltransferase [Caldalkalibacillus thermarum TA2.A1]	0	0	687000	1	0	0	1040000	1	0	0	494000	1	881000	1	852000	1	0	0	0	0	0	0	0	0	0	0	0	0	0	0	0	0	0	0	0	0	0	0	0	0	1300000	2
971	QZT33884.1	triose-phosphate isomerase [Caldalkalibacillus thermarum TA2.A1]	0	0	2240000	1	0	0	0	0	0	0	0	0	0	0	0	0	0	0	0	0	0	0	731000	1	3640000	1	0	0	6340000	2	1500000	1	0	0	0	0	0	0	0	0	771000000	16
972	QZT34330.1	cyclic-di-AMP receptor [Caldalkalibacillus thermarum TA2.A1]	0	0	9450000	1	0	0	0	0	0	0	7640000	1	5110000	1	0	0	0	0	0	0	19200000	2	26100000	3	11200000	2	34600000	3	21500000	2	16700000	1	0	0	56500000	2	0	0	0	0	25800000	4
973	QZT33308.1	ThiF family adenylyltransferase [Caldalkalibacillus thermarum TA2.A1]	0	0	0	0	27800000	2	17500000	2	11100000	1	8790000	1	27200000	2	9790000	1	56200000	4	72600000	3	28200000	2	14000000	3	24500000	5	12500000	2	48100000	4	48700000	6	2660000	1	0	0	0	0	0	0	96100000	13
974	QZT34817.1	thiol peroxidase [Caldalkalibacillus thermarum TA2.A1]	0	0	0	0	47600000	2	0	0	49300000	1	0	0	38700000	1	0	0	0	0	0	0	137000000	4	98200000	5	203000000	3	169000000	4	176000000	2	176000000	4	0	0	103000000	1	0	0	0	0	3490000000	16
975	QZT33116.1	UDP-N-acetylmuramoyl-L-alanyl-D-glutamate--2 6-diaminopimelate ligase [Caldalkalibacillus thermarum TA2.A1]	0	0	0	0	6450000	2	1990000	1	0	0	0	0	6190000	2	1730000	1	3820000	2	11700000	2	3200000	2	5590000	2	19900000	5	11000000	3	25900000	4	19400000	5	0	0	0	0	0	0	0	0	101000000	21
976	QZT33695.1	thymidine kinase [Caldalkalibacillus thermarum TA2.A1]	0	0	0	0	12200000	3	6510000	2	0	0	0	0	2700000	1	0	0	0	0	2730000	1	0	1	5020000	1	11300000	2	1870000	2	2380000	2	1140000	2	0	0	0	0	0	0	0	0	2100000	3
977	QZT34119.1	cysteine hydrolase [Caldalkalibacillus thermarum TA2.A1]	0	0	0	0	7640000	1	5860000	1	5260000	1	0	1	5850000	1	0	0	3910000	1	2480000	1	0	0	0	0	0	0	0	0	7750000	1	2430000	1	0	0	0	0	0	0	0	0	226000000	14
978	QZT33747.1	FAD-dependent thymidylate synthase [Caldalkalibacillus thermarum TA2.A1]	0	0	0	0	1030000	1	1200000	1	1580000	1	0	0	0	1	0	0	0	0	1900000	1	3130000	1	3570000	2	11800000	2	2260000	1	18100000	2	0	0	2130000	1	0	0	0	0	0	0	248000000	12
979	QZT35461.1	phosphonate ABC transporter permease protein PhnE [Caldalkalibacillus thermarum TA2.A1]	0	0	0	0	9660000	2	8660000	2	0	0	0	0	0	0	0	0	0	0	0	0	0	0	0	0	0	0	0	0	0	0	0	0	0	0	0	0	0	0	0	0	0	0
980	QZT33458.1	O-methyltransferase [Caldalkalibacillus thermarum TA2.A1]	0	0	0	0	7400000	1	6570000	1	0	0	0	0	4280000	1	3990000	1	6280000	1	4850000	1	0	0	903000	1	5620000	3	4710000	2	6580000	2	11200000	3	0	0	0	0	0	0	0	0	8380000	5
981	QZT32455.1	acyl-CoA/acyl-ACP dehydrogenase [Caldalkalibacillus thermarum TA2.A1]	0	0	0	0	1970000	1	1690000	2	728000	1	0	0	0	0	0	0	0	0	0	0	0	0	0	0	0	0	0	0	10400000	1	0	0	0	0	0	0	0	0	0	0	0	0
982	QZT34100.1	3D-(3 5/4)-trihydroxycyclohexane-1 2-dione acylhydrolase (decyclizing) [Caldalkalibacillus thermarum TA2.A1]	0	0	0	0	1790000	1	3510000	2	0	0	0	0	1660000	1	0	0	0	0	2370000	2	0	0	0	0	0	0	1510000	1	3390000	1	2980000	2	0	0	0	0	0	0	0	0	47900000	17
983	QZT34582.1	tRNA (adenosine(37)-N6)-threonylcarbamoyltransferase complex transferase subunit TsaD [Caldalkalibacillus thermarum TA2.A1]	0	0	0	0	2010000	1	1350000	1	0	0	0	0	859000	1	0	0	0	0	0	0	5570000	2	6560000	3	2880000	2	4220000	1	3630000	1	7690000	2	0	0	0	0	0	0	0	0	13500000	7
984	QZT35401.1	heme o synthase [Caldalkalibacillus thermarum TA2.A1]	0	0	0	0	12400000	1	10300000	1	0	0	0	0	12800000	1	12500000	1	0	0	0	0	50600000	2	51000000	3	16700000	1	56800000	2	75700000	2	54700000	2	0	0	0	0	0	0	22200000	1	2200000	1
985	QZT32618.1	asparaginase [Caldalkalibacillus thermarum TA2.A1]	0	0	0	0	7150000	1	6390000	1	0	0	0	0	0	0	2620000	1	0	0	5730000	1	0	0	0	0	3490000	1	2200000	1	3630000	1	2480000	1	0	0	0	0	0	0	0	0	47800000	7
986	QZT33370.1	cytidine deaminase [Caldalkalibacillus thermarum TA2.A1]	0	0	0	0	10800000	1	8990000	1	0	0	0	0	0	0	0	0	9220000	1	0	0	0	0	0	0	0	0	0	1	5160000	2	6420000	2	0	0	0	0	0	0	2140000	1	81400000	8
987	QZT34518.1	DEAD/DEAH box helicase [Caldalkalibacillus thermarum TA2.A1]	0	0	0	0	7300000	2	5720000	2	2920000	1	2090000	1	2490000	1	1390000	1	1870000	1	16100000	3	33100000	4	7120000	3	30200000	6	11800000	2	29700000	6	14400000	3	1620000	1	0	0	0	0	0	0	7660000	8
988	QZT33160.1	anti-sigma F factor [Caldalkalibacillus thermarum TA2.A1]	0	0	0	0	0	1	1340000	1	2100000	1	0	0	2290000	1	0	0	0	0	0	0	0	0	0	0	0	0	0	0	8050000	2	547000	1	0	0	0	0	0	0	0	0	7120000	3
989	QZT32792.1	NFACT family protein [Caldalkalibacillus thermarum TA2.A1]	0	0	0	0	3690000	2	2060000	1	0	0	0	0	872000	1	0	0	1490000	1	0	0	0	0	0	0	0	0	0	0	0	0	0	0	0	0	0	0	0	0	0	0	0	0
990	QZT33821.1	biotin synthase BioB [Caldalkalibacillus thermarum TA2.A1]	0	0	0	0	4630000	1	0	0	0	0	0	0	0	0	2130000	1	2800000	1	0	0	6380000	1	0	0	13700000	2	7810000	1	21400000	4	16400000	3	0	0	0	0	0	0	0	0	16900000	10
991	QZT34600.1	glutamine-hydrolyzing GMP synthase [Caldalkalibacillus thermarum TA2.A1]	0	0	0	0	3430000	1	4950000	2	0	0	3210000	1	0	0	1790000	1	2770000	1	1680000	1	8490000	1	7540000	1	16700000	4	12500000	5	52500000	7	33000000	6	0	0	0	0	0	0	0	0	862000000	31
992	QZT35254.1	aminotransferase class I/II-fold pyridoxal phosphate-dependent enzyme [Caldalkalibacillus thermarum TA2.A1]	0	0	0	0	5250000	2	0	0	0	0	0	0	1220000	1	0	0	2010000	1	2370000	1	0	0	0	0	0	0	0	0	245000	1	0	0	0	0	0	0	0	0	0	0	119000000	10
993	QZT33779.1	altronate dehydratase family protein [Caldalkalibacillus thermarum TA2.A1]	0	0	0	0	0	1	0	1	223000	1	0	0	710000	1	0	1	0	1	0	0	0	0	0	0	1380000	1	0	0	0	0	0	0	0	0	0	0	0	0	0	0	0	0
994	QZT32808.1	L-serine ammonia-lyase iron-sulfur-dependent subunit beta [Caldalkalibacillus thermarum TA2.A1]	0	0	0	0	0	1	0	0	0	0	0	0	0	0	0	0	7900000	1	0	0	2210000	1	0	0	1080000	1	0	0	0	1	0	1	0	0	0	0	0	0	0	0	1480000	2
995	QZT35474.1	bis(5'-nucleosyl)-tetraphosphatase (symmetrical) YqeK [Caldalkalibacillus thermarum TA2.A1]	0	0	0	0	7980000	1	7100000	1	0	0	0	0	0	0	0	0	0	0	0	0	2420000	1	0	0	0	0	1710000	1	0	0	0	0	0	0	0	0	0	0	0	0	13600000	5
996	QZT33541.1	ATP-dependent Clp endopeptidase proteolytic subunit ClpP [Caldalkalibacillus thermarum TA2.A1]	0	0	0	0	16100000	2	13900000	1	15000000	2	13500000	2	11600000	1	10900000	1	0	0	0	0	0	0	0	0	9620000	2	24000000	2	9590000	1	8460000	1	0	0	0	0	0	0	0	0	8550000	1
997	QZT32800.1	methionyl-tRNA formyltransferase [Caldalkalibacillus thermarum TA2.A1]	0	0	0	0	2960000	1	2530000	1	0	0	1520000	1	0	0	0	0	0	0	0	0	1370000	1	0	0	1080000	1	820000	1	252000	1	0	0	0	0	0	0	0	0	0	0	100000000	13
998	QZT32745.1	amidohydrolase [Caldalkalibacillus thermarum TA2.A1]	0	0	0	0	13700000	1	0	0	11500000	1	10300000	1	9640000	1	0	0	307000	1	0	0	0	1	23400000	4	2540000	1	2040000	1	13100000	2	7080000	2	0	0	0	0	0	0	0	0	136000000	16
999	QZT32934.1	BrxA/BrxB family bacilliredoxin [Caldalkalibacillus thermarum TA2.A1]	0	0	0	0	5310000	1	1390000	1	0	0	0	0	0	0	0	0	6700000	2	5500000	1	0	0	0	0	7100000	1	0	0	102000000	5	81100000	4	9600000	1	74600000	2	0	0	1840000	1	362000000	12
1000	QZT34193.1	UDP-N-acetylglucosamine 1-carboxyvinyltransferase [Caldalkalibacillus thermarum TA2.A1]	0	0	0	0	9040000	1	11300000	2	0	0	0	0	6350000	2	312000	2	11100000	2	0	0	0	0	0	0	20700000	2	19800000	3	90600000	7	51100000	3	0	0	0	0	0	0	0	0	69400000	19
1001	QZT33310.1	molybdenum cofactor biosynthesis protein MoaE [Caldalkalibacillus thermarum TA2.A1]	0	0	0	0	25100000	1	0	0	0	0	0	0	11900000	1	11600000	1	35500000	1	26800000	1	40000000	3	24000000	2	29700000	2	16000000	1	32100000	2	13400000	1	0	0	0	0	0	0	15600000	1	49700000	4
1002	QZT34620.1	phosphoribosylamine--glycine ligase [Caldalkalibacillus thermarum TA2.A1]	0	0	0	0	4100000	1	2150000	1	0	1	0	0	0	0	2890000	2	4470000	2	0	0	0	0	2500000	1	0	0	3100000	1	23100000	4	17700000	3	0	0	0	0	0	0	0	0	212000000	17
1003	QZT35471.1	formate dehydrogenase-N subunit alpha [Caldalkalibacillus thermarum TA2.A1]	0	0	0	0	0	1	0	1	0	0	0	0	0	0	0	0	0	0	0	0	0	0	0	0	0	0	0	0	0	0	0	0	0	0	0	0	0	0	0	0	0	0
1004	QZT34246.1	NADP-dependent phosphogluconate dehydrogenase [Caldalkalibacillus thermarum TA2.A1]	0	0	0	0	4380000	1	0	0	0	0	8720000	1	3220000	2	2290000	1	3100000	1	3050000	1	0	0	0	0	11000000	4	3320000	3	57300000	7	101000000	7	0	0	0	0	3580000	1	0	0	477000000	24
1005	QZT33166.1	phosphopentomutase [Caldalkalibacillus thermarum TA2.A1]	0	0	0	0	2460000	1	4030000	1	5490000	1	2090000	1	2200000	1	4260000	1	1220000	1	0	0	10000000	1	13100000	3	5840000	2	9950000	3	45100000	5	25100000	6	428000	1	0	0	0	0	0	0	76700000	12
1006	QZT34885.1	metal-sensitive transcriptional regulator [Caldalkalibacillus thermarum TA2.A1]	0	0	0	0	25000000	1	13900000	1	23500000	1	14900000	1	0	0	11300000	1	0	0	8860000	1	2060000	1	6720000	1	59300000	2	52700000	2	18300000	1	28300000	2	0	0	64800000	2	0	0	0	0	35300000	4
1007	QZT34754.1	type I-B CRISPR-associated protein Cas5b [Caldalkalibacillus thermarum TA2.A1]	0	0	0	0	4540000	1	3780000	1	0	0	0	0	0	0	0	0	11300000	1	0	0	0	0	0	0	10100000	2	10900000	2	7130000	2	13700000	2	0	0	0	0	0	0	0	0	251000000	14
1008	QZT34341.1	Veg family protein [Caldalkalibacillus thermarum TA2.A1]	0	0	0	0	9230000	1	8160000	1	15300000	1	13400000	1	0	0	0	0	0	0	4680000	1	9990000	1	9260000	2	68300000	2	57300000	1	88800000	3	66000000	3	0	0	0	0	0	0	51200000	1	10100000	2
1009	QZT34035.1	LCP family protein [Caldalkalibacillus thermarum TA2.A1]	0	0	0	0	685000	1	0	0	0	0	0	0	0	0	0	0	0	0	0	0	0	0	0	0	0	0	0	0	0	0	0	0	0	0	0	0	0	0	0	0	0	0
1010	QZT33318.1	MoaD/ThiS family protein [Caldalkalibacillus thermarum TA2.A1]	0	0	0	0	4290000	1	4370000	1	0	0	0	0	2980000	1	0	0	3870000	1	0	0	0	0	0	0	0	0	0	0	0	0	1040000	1	0	0	0	0	0	0	0	0	55800000	2
1011	QZT32924.1	MerR family transcriptional regulator [Caldalkalibacillus thermarum TA2.A1]	0	0	0	0	937000	1	547000	1	0	0	0	0	0	0	0	0	0	0	5310000	1	5930000	1	5890000	1	0	0	1690000	1	0	0	2200000	1	0	0	0	0	0	0	0	0	11900000	5
1012	QZT33165.1	purine-nucleoside phosphorylase [Caldalkalibacillus thermarum TA2.A1]	0	0	0	0	1130000	1	186000	1	0	0	0	0	0	0	0	0	2160000	1	2340000	1	0	0	0	0	0	0	0	0	0	0	2480000	1	0	0	0	0	0	0	0	0	167000000	12
1013	QZT34031.1	S8 family serine peptidase [Caldalkalibacillus thermarum TA2.A1]	0	0	0	0	1770000	1	1560000	1	0	0	0	0	2710000	1	1900000	1	1300000	1	0	0	0	0	0	0	811000	1	0	0	1010000	1	0	0	0	0	0	0	0	0	0	0	82600	1
1014	QZT34247.1	PucR family transcriptional regulator [Caldalkalibacillus thermarum TA2.A1]	0	0	0	0	0	1	0	0	0	0	0	0	0	0	0	0	0	0	8730000	1	3100000	1	0	1	3100000	1	2200000	1	0	1	686000	1	0	0	0	0	0	0	0	0	0	0
1015	QZT34811.1	dUTP diphosphatase [Caldalkalibacillus thermarum TA2.A1]	0	0	0	0	6000000	1	0	0	0	0	0	0	6160000	1	7510000	2	1080000	1	7410000	1	0	0	0	0	0	0	0	0	6660000	1	1390000	1	0	0	0	0	0	0	0	0	39400000	7
1016	QZT34301.1	DNA replication/repair protein RecF [Caldalkalibacillus thermarum TA2.A1]	0	0	0	0	1180000	1	964000	1	0	0	0	0	0	0	0	1	0	0	0	0	0	0	0	0	0	0	0	0	0	0	0	0	0	0	0	0	0	0	0	0	77700	1
1017	QZT34037.1	DUF5693 family protein [Caldalkalibacillus thermarum TA2.A1]	0	0	0	0	1460000	1	729000	1	910000	1	646000	1	0	0	0	0	758000	1	0	0	0	0	0	0	0	0	0	0	0	0	0	0	0	0	0	0	0	0	0	0	0	0
1018	QZT33819.1	8-amino-7-oxononanoate synthase [Caldalkalibacillus thermarum TA2.A1]	0	0	0	0	2680000	1	0	0	0	0	0	0	0	0	0	0	10700000	2	8430000	2	2080000	1	2180000	1	314000	2	683000	1	1090000	1	0	0	0	0	0	0	0	0	0	0	477000	3
1019	QZT32636.1	patatin-like phospholipase family protein [Caldalkalibacillus thermarum TA2.A1]	0	0	0	0	12300000	1	0	0	0	0	0	0	0	0	0	0	0	0	3490000	1	0	0	0	0	0	0	0	0	0	0	0	0	0	0	0	0	0	0	0	0	109000	1
1020	QZT33569.1	MaoC family dehydratase N-terminal domain-containing protein [Caldalkalibacillus thermarum TA2.A1]	0	0	0	0	0	1	221000	1	0	0	0	0	0	0	0	0	0	0	0	0	0	0	0	0	0	0	0	0	0	0	0	0	0	0	0	0	0	0	0	0	0	0
1021	QZT34203.1	mechanosensitive ion channel family protein [Caldalkalibacillus thermarum TA2.A1]	0	0	0	0	8910000	1	7940000	1	0	0	0	0	0	0	0	0	255000000	3	237000000	2	0	0	0	0	0	0	0	0	27600000	2	62700000	3	0	0	50700000	1	0	0	0	0	240000000	7
1022	QZT32537.1	YtoQ family protein [Caldalkalibacillus thermarum TA2.A1]	0	0	0	0	3580000	1	0	0	0	0	0	0	0	0	0	0	40900000	2	38000000	2	0	0	0	0	0	0	0	0	6900000	1	0	0	0	0	10900000	1	0	0	0	0	311000000	9
1023	QZT35230.1	metallophosphatase family protein [Caldalkalibacillus thermarum TA2.A1]	0	0	0	0	7690000	1	0	0	0	0	0	0	0	0	0	0	4380000	1	0	0	0	0	0	0	0	0	0	0	20300000	4	11500000	2	0	0	0	0	0	0	0	0	172000000	14
1024	QZT34227.1	biotin transporter BioY [Caldalkalibacillus thermarum TA2.A1]	0	0	0	0	2310000	1	0	0	12300000	1	0	0	0	0	0	0	3060000	1	0	0	0	0	0	0	0	0	0	0	0	0	0	0	0	0	0	0	0	0	0	0	3080000	1
1025	QZT33365.1	glycine--tRNA ligase subunit beta [Caldalkalibacillus thermarum TA2.A1]	0	0	0	0	1750000	1	1730000	2	0	1	0	0	914000	1	0	0	2720000	1	2760000	1	20000000	2	2010000	1	5980000	1	0	0	2490000	1	6310000	2	0	0	0	0	0	0	2960000	2	146000000	30
1026	QZT34540.1	acyl--CoA ligase [Caldalkalibacillus thermarum TA2.A1]	0	0	0	0	2890000	1	2740000	1	0	0	0	0	3520000	2	2990000	1	2190000	1	4170000	2	14700000	3	7980000	3	22000000	5	26900000	4	34300000	4	9580000	3	0	0	0	0	0	0	0	0	149000000	23
1027	QZT34810.1	PAS domain S-box protein [Caldalkalibacillus thermarum TA2.A1]	0	0	0	0	1920000	1	0	0	4540000	1	0	0	4910000	1	0	0	3720000	1	6570000	2	0	0	1510000	1	0	0	0	0	17000000	3	18900000	3	0	0	0	0	0	0	0	0	0	0
1028	QZT34695.1	SDR family oxidoreductase [Caldalkalibacillus thermarum TA2.A1]	0	0	0	0	0	1	20200000	3	12600000	3	6030000	2	25800000	3	3000000	2	19000000	4	7670000	4	40100000	6	32700000	5	112000000	8	72700000	6	78600000	8	69700000	7	0	0	8840000	1	0	0	16600000	3	194000000	13
1029	QZT34761.1	3-oxoacyl-ACP reductase [Caldalkalibacillus thermarum TA2.A1]	0	0	0	0	1160000	1	0	0	0	0	0	0	0	0	0	0	0	0	0	0	0	0	0	0	0	0	1750000	1	0	0	0	0	0	0	0	0	0	0	0	0	84800000	10
1030	QZT34690.1	A/G-specific adenine glycosylase [Caldalkalibacillus thermarum TA2.A1]	0	0	0	0	1770000	1	1380000	1	1030000	2	0	0	1410000	1	916000	1	0	0	0	0	0	0	8480000	1	6740000	1	5820000	2	14900000	2	0	0	0	0	0	0	0	0	0	0	7830000	5
1031	QZT32707.1	GTP cyclohydrolase I FolE [Caldalkalibacillus thermarum TA2.A1]	0	0	0	0	4060000	1	5820000	2	0	0	2550000	1	0	0	4050000	2	4570000	1	3690000	1	0	0	0	0	0	0	0	0	1620000	1	1480000	1	0	0	0	0	0	0	0	0	375000000	14
1032	QZT33073.1	hypothetical protein HUR95_12220 [Caldalkalibacillus thermarum TA2.A1]	0	0	0	0	0	1	0	1	0	0	0	0	0	0	0	0	0	1	0	0	0	0	0	0	0	0	0	0	0	0	0	0	0	0	0	0	0	0	0	0	0	0
1033	QZT33064.1	hypothetical protein HUR95_12160 [Caldalkalibacillus thermarum TA2.A1]	0	0	0	0	0	1	0	1	0	0	0	0	0	0	0	0	0	1	0	0	0	0	0	0	0	0	0	0	0	0	0	0	0	0	0	0	0	0	0	0	0	0
1034	QZT33468.1	cysteine desulfurase [Caldalkalibacillus thermarum TA2.A1]	0	0	0	0	7730000	1	0	0	0	0	0	0	0	0	0	0	1350000	1	0	0	0	0	0	0	0	0	829000	1	18500000	2	19600000	3	0	0	0	0	0	0	4130000	1	241000000	11
1035	QZT33767.1	divalent metal cation transporter [Caldalkalibacillus thermarum TA2.A1]	0	0	0	0	181000	1	0	0	0	0	0	0	0	0	0	0	0	0	0	0	0	0	0	0	0	0	0	0	0	0	0	0	4130000	1	0	0	0	0	0	0	4440000	2
1036	QZT34371.1	transposase [Caldalkalibacillus thermarum TA2.A1]	0	0	0	0	4780000	1	0	0	0	0	0	0	0	0	2690000	1	3250000	1	0	0	0	0	0	0	0	0	0	0	0	0	2430000	1	0	0	0	0	0	0	0	0	0	0
1037	QZT34117.1	transposase [Caldalkalibacillus thermarum TA2.A1]	0	0	0	0	4780000	1	0	0	0	0	0	0	0	0	2690000	1	3250000	1	0	0	17700000	1	0	0	0	0	0	0	0	0	2430000	1	0	0	0	0	0	0	0	0	0	0
1038	QZT34196.1	CTP synthase [Caldalkalibacillus thermarum TA2.A1]	0	0	0	0	2140000	1	2390000	2	0	0	0	0	1110000	1	0	0	0	0	0	0	3950000	1	0	0	2260000	1	7130000	3	0	0	920000	2	0	0	0	0	0	0	0	0	154000000	19
1039	QZT33816.1	LacI family transcriptional regulator [Caldalkalibacillus thermarum TA2.A1]	0	0	0	0	2900000	1	0	0	0	0	0	0	0	0	0	0	0	0	0	0	0	0	0	0	0	0	0	0	0	0	0	0	0	0	0	0	0	0	0	0	0	0
1040	QZT32780.1	dihydroorotate dehydrogenase electron transfer subunit [Caldalkalibacillus thermarum TA2.A1]	0	0	0	0	549000	1	0	0	0	0	0	0	0	0	0	0	634000	1	0	0	0	0	0	0	0	0	0	0	0	0	0	0	0	0	0	0	0	0	0	0	0	0
1041	QZT32963.1	SDR family oxidoreductase [Caldalkalibacillus thermarum TA2.A1]	0	0	0	0	1150000	1	0	0	0	0	0	0	0	0	0	0	1090000	1	3490000	2	0	0	0	0	0	0	0	0	0	0	0	0	0	0	0	0	0	0	0	0	0	0
1042	QZT35191.1	replicative DNA helicase [Caldalkalibacillus thermarum TA2.A1]	0	0	0	0	319000	1	0	0	0	0	0	0	0	0	0	0	0	0	0	0	0	0	0	0	0	0	0	0	0	0	0	0	0	0	0	0	0	0	0	0	0	0
1043	QZT33099.1	peptidoglycan editing factor PgeF [Caldalkalibacillus thermarum TA2.A1]	0	0	0	0	648000	1	0	0	0	0	0	0	0	0	0	0	0	0	0	0	758000	1	444000	1	3360000	1	0	0	3370000	1	0	0	0	0	0	0	0	0	0	0	16200000	7
1044	QZT35049.1	response regulator transcription factor [Caldalkalibacillus thermarum TA2.A1]	0	0	0	0	1540000	1	1150000	1	0	0	0	0	0	0	1030000	1	0	0	0	0	0	0	3380000	1	2220000	1	1750000	1	1620000	1	0	0	0	0	0	0	0	0	0	0	0	0
1045	QZT33090.1	aspartate aminotransferase family protein [Caldalkalibacillus thermarum TA2.A1]	0	0	0	0	1400000	1	0	0	0	0	0	0	0	0	0	0	0	0	0	0	1970000	1	2060000	1	0	0	0	0	0	0	0	1	0	0	0	0	0	0	0	0	17000000	9
1046	QZT33602.1	RimK family alpha-L-glutamate ligase [Caldalkalibacillus thermarum TA2.A1]	0	0	0	0	173000	1	0	0	1380000	1	694000	1	108000	1	170000	1	0	0	0	0	1290000	1	804000	1	3370000	2	2530000	2	11300000	2	10400000	3	0	0	0	0	0	0	0	0	0	0
1047	QZT34071.1	chromate transporter [Caldalkalibacillus thermarum TA2.A1]	0	0	0	0	2410000	1	2270000	1	0	0	0	0	1430000	1	0	0	1080000	1	0	0	0	0	0	0	0	0	0	0	0	0	0	0	0	0	0	0	0	0	0	0	0	1
1048	QZT33065.1	tyrosine-type recombinase/integrase [Caldalkalibacillus thermarum TA2.A1]	0	0	0	0	176000	1	0	0	0	0	0	0	0	0	0	0	0	0	0	0	0	0	0	0	0	0	0	0	0	0	5540000	1	0	0	0	0	0	0	0	0	0	0
1049	QZT33735.1	NifU family protein [Caldalkalibacillus thermarum TA2.A1]	0	0	0	0	10200000	1	0	0	0	0	0	0	0	0	0	0	0	0	0	0	21700000	2	21800000	1	61700000	3	48000000	3	79100000	2	79500000	4	38000000	1	220000000	3	21500000	2	97000000	3	303000000	6
1050	QZT34542.1	NAD(P)H:quinone oxidoreductase [Caldalkalibacillus thermarum TA2.A1]	0	0	0	0	8900000	1	3100000	2	0	0	0	1	3780000	1	0	0	4100000	1	0	0	30800000	2	36500000	3	25400000	3	28500000	3	65200000	3	25600000	2	11700000	1	101000000	2	26600000	1	0	0	2500000000	11
1051	QZT34061.1	hypothetical protein HUR95_01070 [Caldalkalibacillus thermarum TA2.A1]	0	0	0	0	0	0	4770000	3	2470000	1	0	0	4480000	2	4270000	3	3440000	1	4710000	2	0	0	3900000	1	79900000	4	61000000	4	127000000	7	80600000	6	0	0	0	0	0	0	0	0	3200000	5
1052	QZT35495.1	leucyl aminopeptidase [Caldalkalibacillus thermarum TA2.A1]	0	0	0	0	0	0	1700000	1	664000	1	7890000	3	5570000	1	1600000	1	11000000	3	4750000	1	0	0	4760000	1	0	0	19200000	2	62100000	7	41900000	8	0	0	31000000	5	0	0	0	0	945000000	30
1053	QZT32901.1	peroxiredoxin [Caldalkalibacillus thermarum TA2.A1]	0	0	0	0	0	0	7500000	1	0	0	0	0	8410000	1	13200000	2	16300000	1	13500000	1	8490000	1	42600000	2	101000000	4	66900000	4	108000000	3	82700000	3	0	0	0	0	0	0	0	0	379000000	13
1054	QZT33690.1	thymidine kinase [Caldalkalibacillus thermarum TA2.A1]	0	0	0	0	0	0	6510000	2	0	0	0	0	2700000	1	0	0	0	0	2730000	1	0	0	0	0	0	0	0	0	0	0	0	0	0	0	0	0	0	0	0	0	0	0
1055	QZT35062.1	tyrosine--tRNA ligase [Caldalkalibacillus thermarum TA2.A1]	0	0	0	0	0	0	1910000	1	5290000	1	628000	1	0	0	1360000	1	0	0	696000	1	39700000	2	32700000	4	50300000	3	4750000	1	29700000	4	41500000	5	0	0	0	0	0	0	0	0	545000000	27
1056	QZT34776.1	dipeptidase [Caldalkalibacillus thermarum TA2.A1]	0	0	0	0	0	0	25400000	2	5150000	1	3890000	1	0	0	0	0	3750000	1	29800000	1	0	1	0	0	62300000	5	43400000	5	150000000	8	74200000	6	0	0	0	0	0	0	0	0	380000000	22
1057	QZT33307.1	HAD family hydrolase [Caldalkalibacillus thermarum TA2.A1]	0	0	0	0	0	0	4160000	1	3540000	1	0	0	0	0	0	0	0	0	0	0	3380000	1	4570000	2	0	0	0	2	0	1	0	1	0	0	0	0	0	0	0	0	24000000	9
1058	QZT35088.1	class I SAM-dependent methyltransferase [Caldalkalibacillus thermarum TA2.A1]	0	0	0	0	0	0	325000	1	0	0	0	0	0	0	349000	1	295000	1	0	0	0	1	658000	1	1330000	1	0	1	1720000	1	1250000	1	0	0	0	0	0	0	0	0	4930000	4
1059	QZT34638.1	DNA helicase PcrA [Caldalkalibacillus thermarum TA2.A1]	0	0	0	0	0	0	1890000	1	0	0	0	0	0	0	273000	1	0	0	6000000	3	5500000	1	1740000	1	3400000	1	0	0	612000	1	242000	1	0	0	0	0	0	0	0	0	53400000	28
1060	QZT32464.1	ACR3 family arsenite efflux transporter [Caldalkalibacillus thermarum TA2.A1]	0	0	0	0	0	0	2060000	1	1500000	1	1400000	1	1760000	1	0	0	1690000	1	1190000	1	0	0	0	0	0	0	0	0	0	0	0	0	0	0	0	0	0	0	0	0	1660000	1
1061	QZT33083.1	potassium/proton antiporter [Caldalkalibacillus thermarum TA2.A1]	0	0	0	0	0	0	2420000	1	0	1	0	0	0	0	1520000	1	0	0	0	0	0	0	0	0	0	0	0	0	0	1	0	0	0	0	0	0	0	0	0	0	0	0
1062	QZT32606.1	LLM class flavin-dependent oxidoreductase [Caldalkalibacillus thermarum TA2.A1]	0	0	0	0	0	0	350000	1	0	0	0	0	0	0	0	0	2750000	1	630000	1	1510000	1	1180000	1	10700000	3	171000	1	0	0	55700	1	0	0	0	0	0	0	0	0	26200000	11
1063	QZT32725.1	tetratricopeptide repeat protein [Caldalkalibacillus thermarum TA2.A1]	0	0	0	0	0	0	819000	1	0	0	0	0	0	0	0	0	0	0	0	0	0	0	0	0	0	0	0	0	0	0	0	0	0	0	0	0	0	0	0	0	4550000	3
1064	QZT34534.1	homoserine O-succinyltransferase [Caldalkalibacillus thermarum TA2.A1]	0	0	0	0	0	0	9850000	1	0	0	0	0	0	0	0	0	0	0	0	0	21300000	1	10000000	1	8990000	1	28600000	2	9410000	2	5090000	1	0	0	0	0	0	0	0	0	456000000	17
1065	QZT33480.1	protein translocase subunit SecF [Caldalkalibacillus thermarum TA2.A1]	0	0	0	0	0	0	949000	1	6000000	1	6340000	1	0	0	2870000	1	0	1	0	0	3780000	1	1540000	1	1850000	1	1620000	1	119000000	4	92200000	4	43800000	4	0	0	0	0	0	0	17300000	5
1066	QZT32462.1	O-methyltransferase [Caldalkalibacillus thermarum TA2.A1]	0	0	0	0	0	0	588000	1	0	0	0	0	0	0	0	0	0	0	1420000	1	0	0	0	0	0	0	0	0	0	0	0	0	0	0	0	0	0	0	0	0	118000000	11
1067	QZT34591.1	hypothetical protein HUR95_04295 [Caldalkalibacillus thermarum TA2.A1]	0	0	0	0	0	0	1510000	1	0	0	0	0	0	0	0	0	0	0	0	0	0	0	0	0	0	0	0	0	0	0	0	0	0	0	0	0	0	0	0	0	0	0
1068	QZT35128.1	phosphatidylglycerophosphatase A [Caldalkalibacillus thermarum TA2.A1]	0	0	0	0	0	0	1190000	1	0	0	0	0	0	0	1190000	1	667000	1	0	0	0	0	362000	1	0	0	0	0	0	0	710000	1	0	0	0	0	0	0	0	0	83500000	6
1069	QZT34801.1	aminotransferase A [Caldalkalibacillus thermarum TA2.A1]	0	0	0	0	0	0	0	1	803000	1	0	0	712000	1	0	0	0	0	0	0	0	0	0	0	3940000	2	2720000	2	1240000	1	0	0	0	0	0	0	0	0	0	0	60500000	16
1070	QZT34537.1	type I methionyl aminopeptidase [Caldalkalibacillus thermarum TA2.A1]	0	0	0	0	0	0	0	1	0	0	0	0	0	0	0	0	0	0	0	0	0	0	0	0	0	0	0	0	0	0	1950000	1	0	0	0	0	0	0	0	0	0	0
1071	QZT35277.1	PaaI family thioesterase [Caldalkalibacillus thermarum TA2.A1]	0	0	0	0	0	0	7190000	1	0	0	0	0	0	0	0	0	53800000	1	81900000	1	0	0	0	0	10500000	2	11100000	2	16700000	2	0	1	0	0	0	0	16100000	1	0	0	76300000	4
1072	QZT35485.1	glutamate racemase [Caldalkalibacillus thermarum TA2.A1]	0	0	0	0	0	0	608000	1	0	0	703000	1	0	0	0	0	0	0	0	0	0	0	0	0	1020000	1	0	0	1380000	1	1320000	1	0	0	0	0	0	0	0	0	15500000	5
1073	QZT34712.1	hypothetical protein HUR95_05240 [Caldalkalibacillus thermarum TA2.A1]	0	0	0	0	0	0	4930000	1	0	0	0	0	3030000	2	0	0	4960000	2	0	0	0	0	0	0	0	0	0	0	0	0	0	0	0	0	0	0	0	0	0	0	53000000	10
1074	QZT33416.1	nicotinate-nucleotide adenylyltransferase [Caldalkalibacillus thermarum TA2.A1]	0	0	0	0	0	0	3240000	1	0	0	0	0	0	0	0	0	0	0	1640000	1	0	0	0	0	0	0	0	0	0	0	0	0	0	0	0	0	0	0	0	0	3880000	3
1075	QZT32817.1	ribonuclease III [Caldalkalibacillus thermarum TA2.A1]	0	0	0	0	0	0	857000	1	0	0	0	0	0	0	0	0	0	0	0	1	0	0	3040000	1	0	0	0	0	0	0	0	0	0	0	0	0	0	0	0	0	24900000	6
1076	QZT33359.1	class I SAM-dependent methyltransferase [Caldalkalibacillus thermarum TA2.A1]	0	0	0	0	0	0	1930000	1	0	0	0	0	0	0	0	0	13600000	3	2920000	1	2290000	1	2770000	1	8070000	2	5660000	2	0	0	0	0	0	0	0	0	0	0	0	0	49100000	12
1077	QZT35054.1	aminopeptidase [Caldalkalibacillus thermarum TA2.A1]	0	0	0	0	0	0	569000	1	1600000	1	2030000	1	3220000	2	0	0	12400000	1	5260000	3	0	0	0	0	18300000	4	7800000	2	32700000	3	27500000	3	0	0	10100000	2	0	0	0	0	249000000	22
1078	QZT33299.1	hypothetical protein HUR95_13555 [Caldalkalibacillus thermarum TA2.A1]	0	0	0	0	0	0	3150000	1	0	1	0	0	3360000	1	0	0	0	0	0	0	0	0	0	0	0	0	0	0	0	0	0	0	0	0	0	0	0	0	0	0	0	0
1079	QZT34794.1	response regulator transcription factor [Caldalkalibacillus thermarum TA2.A1]	0	0	0	0	0	0	275000	1	0	0	0	0	0	0	0	0	1170000	1	0	0	0	0	0	0	0	0	0	0	0	0	0	0	0	0	0	0	0	0	0	0	0	0
1080	QZT34252.1	two-component system regulatory protein YycI [Caldalkalibacillus thermarum TA2.A1]	0	0	0	0	0	0	0	1	0	0	0	0	0	0	0	0	6330000	1	0	0	0	0	0	0	0	0	0	0	31100000	2	16000000	1	0	0	0	0	0	0	0	0	0	0
1081	QZT32697.1	lipoate--protein ligase family protein [Caldalkalibacillus thermarum TA2.A1]	0	0	0	0	0	0	2470000	1	0	0	0	0	0	0	0	0	0	0	0	0	8410000	1	14900000	2	1020000	2	5930000	1	0	0	0	0	0	0	0	0	0	0	0	0	981000	3
1082	QZT32633.1	NAD(P)H-dependent glycerol-3-phosphate dehydrogenase [Caldalkalibacillus thermarum TA2.A1]	0	0	0	0	0	0	493000	1	0	0	0	0	0	0	0	0	533000	1	0	0	0	0	0	0	0	0	0	0	0	0	0	0	0	0	0	0	0	0	0	0	6080000	5
1083	QZT34935.1	hypothetical protein HUR95_06740 [Caldalkalibacillus thermarum TA2.A1]	0	0	0	0	0	0	4650000	1	0	0	0	0	0	0	0	0	0	0	0	0	0	0	0	0	1080000	1	0	0	0	0	0	0	0	0	0	0	0	0	0	0	0	0
1084	QZT32824.1	ribosome maturation factor RimM [Caldalkalibacillus thermarum TA2.A1]	0	0	0	0	0	0	18100000	1	23900000	1	20600000	1	13000000	1	0	0	17400000	1	0	0	3280000	1	1510000	1	0	0	2310000	1	4360000	2	1840000	1	0	0	0	0	0	0	0	0	29600000	4
1085	QZT33013.1	flagellar motor switch protein FliM [Caldalkalibacillus thermarum TA2.A1]	0	0	0	0	0	0	945000	1	0	0	238000	1	788000	1	951000	2	575000	1	0	0	0	0	0	0	0	0	0	0	0	0	0	0	0	0	0	0	0	0	0	0	0	0
1086	QZT32531.1	MBL fold metallo-hydrolase [Caldalkalibacillus thermarum TA2.A1]	0	0	0	0	0	0	1260000	1	0	0	672000	1	1520000	1	855000	1	0	0	0	0	0	0	0	0	0	0	0	0	0	0	0	0	0	0	0	0	0	0	0	0	84400000	12
1087	QZT32704.1	hypothetical protein HUR95_09930 [Caldalkalibacillus thermarum TA2.A1]	0	0	0	0	0	0	1890000	1	0	0	0	0	0	0	0	0	6160000	1	6170000	1	0	0	0	0	0	0	0	0	82400000	4	89200000	7	89500000	2	20600000	1	0	0	0	0	1830000	3
1088	QZT32501.1	DUF4387 domain-containing protein [Caldalkalibacillus thermarum TA2.A1]	0	0	0	0	0	0	181000	1	0	0	799000	1	0	0	0	0	0	0	0	0	0	0	0	0	0	0	0	0	0	0	0	0	0	0	0	0	0	0	0	0	1200000	3
1089	QZT33467.1	ATP-dependent RecD-like DNA helicase [Caldalkalibacillus thermarum TA2.A1]	0	0	0	0	0	0	0	1	299000	1	114000	1	0	1	0	0	0	0	0	0	0	0	0	0	2210000	2	1540000	2	672000	1	1000000	2	0	0	0	0	0	0	0	0	1130000	3
1090	QZT33198.1	Crp/Fnr family transcriptional regulator [Caldalkalibacillus thermarum TA2.A1]	0	0	0	0	0	0	27700000	1	0	0	0	0	0	0	0	0	17300000	1	15400000	1	13700000	1	0	0	0	0	0	0	55900000	1	29300000	3	0	0	0	0	0	0	0	0	26500000	6
1091	QZT34073.1	gamma-glutamyltransferase family protein [Caldalkalibacillus thermarum TA2.A1]	0	0	0	0	0	0	464000	1	0	0	0	0	0	0	0	0	15300000	3	14400000	2	0	0	0	0	0	0	0	0	5830000	3	1790000	2	0	0	0	0	0	0	0	0	1920000000	42
1092	QZT32775.1	bifunctional pyr operon transcriptional regulator/uracil phosphoribosyltransferase PyrR [Caldalkalibacillus thermarum TA2.A1]	0	0	0	0	0	0	582000	1	0	0	460000	1	0	0	0	0	0	0	0	0	0	0	0	0	0	0	6620000	1	0	0	0	0	0	0	8440000	1	0	0	0	0	112000000	12
1093	QZT32918.1	pyridoxine/pyridoxal/pyridoxamine kinase [Caldalkalibacillus thermarum TA2.A1]	0	0	0	0	0	0	0	0	25900000	4	21300000	1	0	0	804000	1	14700000	2	13600000	1	43700000	3	30300000	4	81600000	7	71000000	7	99300000	8	53100000	8	7290000	1	0	0	0	0	0	0	491000000	17
1094	QZT34159.1	NADH-quinone oxidoreductase subunit NuoI [Caldalkalibacillus thermarum TA2.A1]	0	0	0	0	0	0	0	0	42900000	2	56600000	4	11000000	1	0	0	0	0	0	0	69100000	2	68700000	2	153000000	2	202000000	3	722000000	5	565000000	4	227000000	2	616000000	3	130000000	1	434000000	3	36300000	4
1095	QZT32734.1	YitT family protein [Caldalkalibacillus thermarum TA2.A1]	0	0	0	0	0	0	0	0	20800000	2	16100000	2	0	0	0	0	0	0	4840000	1	0	0	0	0	3440000	1	0	0	0	0	10700000	3	0	0	0	0	0	0	7140000	1	0	0
1096	QZT34962.1	methyl-accepting chemotaxis protein [Caldalkalibacillus thermarum TA2.A1]	0	0	0	0	0	0	0	0	324000	1	0	0	570000	1	0	0	0	0	0	0	0	0	0	0	0	0	0	0	0	0	0	0	0	0	0	0	0	0	0	0	0	0
1097	QZT33357.1	MATE family efflux transporter [Caldalkalibacillus thermarum TA2.A1]	0	0	0	0	0	0	0	0	2970000	1	0	0	0	0	0	0	0	0	0	0	0	0	0	0	0	0	0	0	0	0	0	0	0	0	0	0	0	0	0	0	0	0
1098	QZT35452.1	Asp23/Gls24 family envelope stress response protein [Caldalkalibacillus thermarum TA2.A1]	0	0	0	0	0	0	0	0	0	1	12700000	1	0	0	3090000	1	0	0	0	0	21900000	1	21200000	2	81400000	3	1580000	1	181000000	4	18000000	1	30200000	2	0	0	37600000	1	4730000	1	168000000	4
1099	QZT32923.1	transcriptional repressor LexA [Caldalkalibacillus thermarum TA2.A1]	0	0	0	0	0	0	0	0	5860000	2	1700000	1	1770000	1	0	0	3460000	1	2690000	1	34300000	2	90400000	3	78700000	2	113000000	3	130000000	4	117000000	3	5650000	1	40100000	1	0	0	9620000	1	2720000	1
1100	QZT34276.1	class II aldolase/adducin family protein [Caldalkalibacillus thermarum TA2.A1]	0	0	0	0	0	0	0	0	0	1	0	1	0	0	0	0	5600000	1	0	0	20500000	5	3550000	2	22300000	4	23700000	4	21500000	3	30200000	5	17300000	2	0	0	0	0	1540000	1	19100000	9
1101	QZT34753.1	TIGR02556 family CRISPR-associated protein [Caldalkalibacillus thermarum TA2.A1]	0	0	0	0	0	0	0	0	6740000	1	0	0	6470000	2	564000	1	0	0	0	0	0	0	0	0	6840000	1	6520000	1	10800000	2	16000000	3	0	0	0	0	0	0	0	0	1480000000	49
1102	QZT35077.1	transcriptional repressor [Caldalkalibacillus thermarum TA2.A1]	0	0	0	0	0	0	0	0	1190000	1	0	0	0	0	0	0	0	0	0	0	0	0	0	0	1150000	1	0	0	0	0	0	0	0	0	0	0	0	0	0	0	0	0
1103	QZT34891.1	iron-containing alcohol dehydrogenase [Caldalkalibacillus thermarum TA2.A1]	0	0	0	0	0	0	0	0	1200000	1	1270000	1	0	0	0	0	0	0	0	0	0	0	1230000	1	0	1	0	1	0	0	0	0	0	0	0	0	0	0	0	0	36200000	11
1104	QZT33953.1	hypothetical protein HUR95_00485 [Caldalkalibacillus thermarum TA2.A1]	0	0	0	0	0	0	0	0	1230000	1	0	0	0	0	0	0	0	0	0	0	459000	1	421000	1	0	0	0	0	0	0	864000	1	0	0	0	0	0	0	0	0	0	0
1105	QZT33456.1	transcription elongation factor GreA [Caldalkalibacillus thermarum TA2.A1]	0	0	0	0	0	0	0	0	0	1	0	0	0	0	0	0	0	0	0	0	0	0	1200000	1	4630000	2	6310000	3	1460000	1	173000	1	0	0	5310000	1	0	0	0	0	415000000	11
1106	QZT35479.1	preprotein translocase subunit YajC [Caldalkalibacillus thermarum TA2.A1]	0	0	0	0	0	0	0	0	17200000	1	15200000	1	0	0	0	0	93400000	2	57100000	2	0	0	2220000	1	1620000	1	0	0	53600000	3	71400000	4	0	0	0	0	0	0	0	0	51000000	2
1107	QZT33312.1	5-formyltetrahydrofolate cyclo-ligase [Caldalkalibacillus thermarum TA2.A1]	0	0	0	0	0	0	0	0	1780000	1	0	0	2360000	1	1710000	1	3040000	1	2340000	1	2340000	1	4700000	1	9180000	2	0	0	19700000	2	11300000	1	0	0	0	0	0	0	0	0	13500000	3
1108	QZT32782.1	orotidine-5'-phosphate decarboxylase [Caldalkalibacillus thermarum TA2.A1]	0	0	0	0	0	0	0	0	0	1	249000	1	0	0	0	0	0	0	0	0	0	0	0	0	0	0	0	0	0	0	0	0	0	0	0	0	0	0	0	0	0	0
1109	QZT34652.1	Asp-tRNA(Asn)/Glu-tRNA(Gln) amidotransferase subunit GatC [Caldalkalibacillus thermarum TA2.A1]	0	0	0	0	0	0	0	0	2870000	1	2190000	1	0	0	0	0	0	0	0	0	0	0	0	0	6330000	1	10700000	2	10700000	2	7200000	2	0	0	0	0	0	0	0	0	16700000	4
1110	QZT34221.1	haloacid dehalogenase-like hydrolase [Caldalkalibacillus thermarum TA2.A1]	0	0	0	0	0	0	0	0	297000	1	385000	1	0	0	0	0	0	0	0	0	0	0	0	0	0	0	0	0	0	0	0	0	0	0	0	0	0	0	0	0	11000000	3
1111	QZT34425.1	50S ribosomal protein L22 [Caldalkalibacillus thermarum TA2.A1]	0	0	0	0	0	0	0	0	8950000	1	0	0	0	0	0	0	0	0	0	0	252000000	5	353000000	6	411000000	5	453000000	5	444000000	6	348000000	5	0	0	544000000	4	21700000	1	17000000	1	105000000	6
1112	QZT35270.1	tRNA dihydrouridine synthase DusB [Caldalkalibacillus thermarum TA2.A1]	0	0	0	0	0	0	0	0	0	1	0	0	0	0	0	0	0	0	607000	2	2330000	1	1960000	1	3440000	2	1060000	1	661000	1	0	0	0	0	0	0	0	0	0	0	4280000	7
1113	QZT34543.1	kinase-associated lipoprotein B [Caldalkalibacillus thermarum TA2.A1]	0	0	0	0	0	0	0	0	5100000	1	0	0	0	0	0	0	0	0	0	0	0	0	0	0	4160000	1	0	0	0	1	0	0	0	0	0	0	0	0	0	0	6530000	3
1114	QZT33954.1	hypothetical protein HUR95_00490 [Caldalkalibacillus thermarum TA2.A1]	0	0	0	0	0	0	0	0	1510000	1	0	0	0	0	0	0	0	0	0	0	0	0	0	0	0	0	0	0	0	0	0	0	0	0	0	0	0	0	0	0	0	0
1115	QZT34242.1	methyl-accepting chemotaxis protein [Caldalkalibacillus thermarum TA2.A1]	0	0	0	0	0	0	0	0	2050000	1	0	0	0	0	0	0	0	0	0	0	0	0	0	0	0	0	0	0	0	0	0	0	0	0	0	0	0	0	0	0	1220000	1
1116	QZT33175.1	MBL fold metallo-hydrolase [Caldalkalibacillus thermarum TA2.A1]	0	0	0	0	0	0	0	0	1250000	1	1190000	1	0	0	753000	1	584000	1	739000	2	809000	1	567000	1	3750000	1	2960000	1	0	0	0	0	0	0	0	0	0	0	0	0	632000000	12
1117	QZT33167.1	site-specific tyrosine recombinase XerD [Caldalkalibacillus thermarum TA2.A1]	0	0	0	0	0	0	0	0	4570000	1	0	0	0	0	0	0	0	0	0	0	0	0	0	0	0	0	5630000	1	4450000	1	0	0	0	0	0	0	0	0	0	0	0	0
1118	QZT34140.1	3-hydroxyacyl-ACP dehydratase FabZ [Caldalkalibacillus thermarum TA2.A1]	0	0	0	0	0	0	0	0	0	1	0	1	2520000	1	1930000	1	0	0	0	0	0	0	0	0	0	0	0	0	0	0	0	0	0	0	0	0	0	0	0	0	1130000000	12
1119	QZT34329.1	dTMP kinase [Caldalkalibacillus thermarum TA2.A1]	0	0	0	0	0	0	0	0	6660000	1	5660000	1	0	0	0	0	3100000	1	0	0	0	0	1400000	1	7990000	1	7460000	3	17700000	3	6930000	1	0	0	0	0	0	0	0	0	30500000	5
1120	QZT33723.1	phage Gp37/Gp68 family protein [Caldalkalibacillus thermarum TA2.A1]	0	0	0	0	0	0	0	0	1960000	1	0	0	2920000	1	0	0	0	0	1490000	1	0	0	0	0	1280000	1	1870000	1	0	0	0	0	0	0	0	0	0	0	0	0	0	0
1121	QZT34968.1	NupC/NupG family nucleoside CNT transporter [Caldalkalibacillus thermarum TA2.A1]	0	0	0	0	0	0	0	0	1770000	1	0	0	0	0	0	0	0	0	0	1	0	0	0	0	0	0	0	0	21700000	3	18300000	2	12400000	1	0	0	0	0	0	0	28700000	4
1122	QZT34523.1	MOSC domain-containing protein [Caldalkalibacillus thermarum TA2.A1]	0	0	0	0	0	0	0	0	0	1	0	0	0	0	0	0	0	0	0	0	0	0	0	0	0	0	0	0	0	0	0	0	0	0	0	0	0	0	0	0	24700000	9
1123	QZT33826.1	heme ABC transporter ATP-binding protein [Caldalkalibacillus thermarum TA2.A1]	0	0	0	0	0	0	0	0	2150000	1	4450000	1	0	0	0	0	0	0	0	0	11300000	2	8880000	1	1490000	2	2550000	3	5810000	2	0	0	0	0	0	0	0	0	839000	1	585000	3
1124	QZT33287.1	glycerate kinase [Caldalkalibacillus thermarum TA2.A1]	0	0	0	0	0	0	0	0	779000	1	0	1	0	0	0	0	0	0	0	0	0	0	2380000	1	0	0	0	0	10500000	4	4810000	1	0	0	0	0	0	0	0	0	102000000	12
1125	QZT34657.1	nitrilase [Caldalkalibacillus thermarum TA2.A1]	0	0	0	0	0	0	0	0	0	1	0	0	366000	1	434000	1	0	1	860000	1	0	0	0	0	5430000	2	271000	1	2350000	1	0	0	0	0	0	0	0	0	441000	1	0	0
1126	QZT34157.1	NADH-quinone oxidoreductase subunit NuoK [Caldalkalibacillus thermarum TA2.A1]	0	0	0	0	0	0	0	0	1650000	1	0	0	0	0	0	0	0	0	0	0	0	0	0	0	0	0	0	0	10100000	1	9190000	1	0	0	0	0	0	0	0	0	3370000	1
1127	QZT34129.1	alanine:cation symporter family protein [Caldalkalibacillus thermarum TA2.A1]	0	0	0	0	0	0	0	0	2430000	1	0	0	27200000	1	23500000	1	0	0	13000000	1	0	0	0	0	0	0	0	0	26500000	2	30400000	2	0	0	19700000	1	0	0	0	0	5880000	4
1128	QZT34970.1	acetolactate synthase small subunit [Caldalkalibacillus thermarum TA2.A1]	0	0	0	0	0	0	0	0	955000	1	0	0	0	0	0	0	0	0	0	0	2620000	1	2750000	1	2910000	1	2490000	1	3580000	1	2370000	1	0	0	0	0	0	0	0	0	170000000	11
1129	QZT33720.1	ParM/StbA family protein [Caldalkalibacillus thermarum TA2.A1]	0	0	0	0	0	0	0	0	0	1	0	0	0	0	0	0	0	1	0	0	0	0	0	0	0	0	0	0	0	0	0	0	0	0	0	0	0	0	0	0	0	0
1130	QZT35241.1	FAD-binding protein [Caldalkalibacillus thermarum TA2.A1]	0	0	0	0	0	0	0	0	15300000	1	0	0	0	0	0	0	0	0	0	0	0	0	0	0	0	0	0	0	0	0	0	0	0	0	0	0	0	0	0	0	42400000	10
1131	QZT34046.1	GDP-mannose 4 6-dehydratase [Caldalkalibacillus thermarum TA2.A1]	0	0	0	0	0	0	0	0	3100000	1	3280000	1	6960000	1	6590000	1	8640000	1	7650000	1	0	0	0	0	0	0	0	0	0	0	0	0	0	0	0	0	0	0	0	0	22700000	7
1132	QZT34261.1	50S ribosomal protein L9 [Caldalkalibacillus thermarum TA2.A1]	0	0	0	0	0	0	0	0	6590000	1	0	0	0	0	0	0	0	0	0	0	120000000	3	172000000	5	75900000	2	61200000	3	153000000	6	86200000	3	6150000	1	572000000	8	12700000	1	0	0	148000000	8
1133	QZT34881.1	aldehyde ferredoxin oxidoreductase C-terminal domain-containing protein [Caldalkalibacillus thermarum TA2.A1]	0	0	0	0	0	0	0	0	607000	1	0	0	0	0	0	0	0	0	0	0	0	0	0	0	0	0	0	0	0	0	0	0	0	0	0	0	0	0	0	0	0	0
1134	QZT32610.1	spore coat protein [Caldalkalibacillus thermarum TA2.A1]	0	0	0	0	0	0	0	0	844000	1	0	0	0	0	0	0	0	0	0	0	0	0	0	0	0	0	0	0	0	0	0	0	0	0	0	0	0	0	0	0	0	0
1135	QZT33446.1	carbon-nitrogen family hydrolase [Caldalkalibacillus thermarum TA2.A1]	0	0	0	0	0	0	0	0	1880000	1	1510000	1	0	0	0	0	0	0	9420000	2	0	0	0	0	0	0	0	0	0	0	0	0	0	0	0	0	0	0	0	0	89400000	11
1136	QZT35279.1	ABC transporter ATP-binding protein [Caldalkalibacillus thermarum TA2.A1]	0	0	0	0	0	0	0	0	1540000	1	0	0	0	0	0	0	0	0	0	0	0	0	0	0	0	0	0	0	0	0	0	0	0	0	0	0	0	0	0	0	0	0
1137	QZT34291.1	tRNA uridine-5-carboxymethylaminomethyl(34) synthesis GTPase MnmE [Caldalkalibacillus thermarum TA2.A1]	0	0	0	0	0	0	0	0	1590000	1	1610000	1	508000	1	801000	1	0	0	0	0	9120000	2	0	2	0	0	0	0	6070000	2	6340000	1	0	0	0	0	0	0	0	0	136000000	19
1138	QZT32802.1	Stk1 family PASTA domain-containing Ser/Thr kinase [Caldalkalibacillus thermarum TA2.A1]	0	0	0	0	0	0	0	0	0	0	42200000	1	30000000	1	24900000	1	24800000	1	29300000	1	0	0	0	1	1840000	1	0	0	0	0	0	0	0	0	0	0	0	0	0	0	504000	2
1139	QZT33553.1	quinone oxidoreductase [Caldalkalibacillus thermarum TA2.A1]	0	0	0	0	0	0	0	0	0	0	550000	1	749000	1	486000	1	0	0	0	0	0	0	815000	1	0	0	0	0	2590000	2	289000	1	0	0	0	0	0	0	0	0	6480000	4
1140	QZT34866.1	hypothetical protein HUR95_06340 [Caldalkalibacillus thermarum TA2.A1]	0	0	0	0	0	0	0	0	0	0	6070000	1	0	0	0	0	0	0	0	0	6340000	1	5760000	1	5620000	1	2870000	1	0	0	0	0	0	0	0	0	0	0	0	0	20600000	2
1141	QZT32983.1	YlxQ family RNA-binding protein [Caldalkalibacillus thermarum TA2.A1]	0	0	0	0	0	0	0	0	0	0	212000	1	2210000	1	0	0	2900000	1	0	0	1960000	1	0	0	0	0	2380000	1	4280000	2	8460000	2	0	0	0	0	0	0	0	0	14400000	3
1142	QZT34049.1	CDP-alcohol phosphatidyltransferase family protein [Caldalkalibacillus thermarum TA2.A1]	0	0	0	0	0	0	0	0	0	0	1520000	1	2870000	1	2410000	1	0	0	0	0	0	0	0	0	0	0	0	0	0	0	0	0	0	0	0	0	0	0	0	0	0	0
1143	QZT34316.1	ABC transporter ATP-binding protein [Caldalkalibacillus thermarum TA2.A1]	0	0	0	0	0	0	0	0	0	0	4210000	1	0	0	0	0	0	0	4720000	1	0	0	0	1	0	0	0	0	0	0	0	0	0	0	4980000	1	0	0	8040000	1	0	0
1144	QZT33705.1	hypothetical protein HUR95_16020 [Caldalkalibacillus thermarum TA2.A1]	0	0	0	0	0	0	0	0	0	0	896000	1	0	0	0	0	0	0	0	0	0	0	0	0	0	0	0	0	0	1	0	0	0	0	0	0	0	0	0	0	0	0
1145	QZT34820.1	M55 family metallopeptidase [Caldalkalibacillus thermarum TA2.A1]	0	0	0	0	0	0	0	0	0	0	1610000	1	0	0	0	0	10300000	2	0	0	0	0	0	0	9450000	1	0	0	2790000	1	0	0	0	0	0	0	0	0	0	0	141000000	11
1146	QZT32710.1	heptaprenyl diphosphate synthase component 1 [Caldalkalibacillus thermarum TA2.A1]	0	0	0	0	0	0	0	0	0	0	620000	1	0	0	0	0	0	0	0	0	0	0	0	0	0	0	0	0	0	0	0	0	0	0	0	0	0	0	0	0	0	0
1147	QZT34579.1	tRNA (adenosine(37)-N6)-threonylcarbamoyltransferase complex ATPase subunit type 1 TsaE [Caldalkalibacillus thermarum TA2.A1]	0	0	0	0	0	0	0	0	0	0	2370000	1	0	0	0	0	569000	1	0	0	0	0	0	0	0	0	0	0	0	0	0	0	0	0	0	0	0	0	0	0	22000000	4
1148	QZT34890.1	IS1634 family transposase [Caldalkalibacillus thermarum TA2.A1]	0	0	0	0	0	0	0	0	0	0	2150000	1	0	0	0	0	0	0	491000	1	0	0	0	0	0	1	0	0	4090000	1	0	0	0	0	0	0	0	0	0	0	0	0
1149	QZT33228.1	hypothetical protein HUR95_13135 [Caldalkalibacillus thermarum TA2.A1]	0	0	0	0	0	0	0	0	0	0	2150000	1	0	0	0	0	0	0	491000	1	0	0	0	0	0	1	0	0	7240000	1	0	0	0	0	0	0	0	0	0	0	0	0
1150	QZT34732.1	IS1634 family transposase [Caldalkalibacillus thermarum TA2.A1]	0	0	0	0	0	0	0	0	0	0	2150000	1	0	0	0	0	0	0	491000	1	0	0	0	0	0	1	0	0	7240000	1	0	0	0	0	0	0	0	0	0	0	0	0
1151	QZT32661.1	NAD(+)/NADH kinase [Caldalkalibacillus thermarum TA2.A1]	0	0	0	0	0	0	0	0	0	0	5380000	1	0	0	0	0	0	0	2850000	1	0	0	1910000	1	4150000	1	5450000	1	6220000	1	4750000	1	0	0	0	0	0	0	0	0	30400000	7
1152	QZT35216.1	FixH family protein [Caldalkalibacillus thermarum TA2.A1]	0	0	0	0	0	0	0	0	0	0	3410000	1	0	0	0	0	0	0	0	0	0	0	54700000	1	49900000	1	35500000	1	142000000	1	127000000	1	828000000	3	0	0	0	0	0	0	37200000	2
1153	QZT34154.1	NADH-quinone oxidoreductase subunit NuoN [Caldalkalibacillus thermarum TA2.A1]	0	0	0	0	0	0	0	0	0	0	2860000	1	0	0	0	0	0	0	0	0	0	0	0	0	0	0	0	0	0	0	0	0	0	0	0	0	0	0	0	0	0	0
1154	QZT33447.1	pyridoxal phosphate-dependent aminotransferase [Caldalkalibacillus thermarum TA2.A1]	0	0	0	0	0	0	0	0	0	0	0	1	0	0	0	0	186000	1	0	0	0	0	0	0	570000	1	0	0	0	0	0	0	0	0	0	0	0	0	0	0	29200000	7
1155	QZT35198.1	BREX-3 system P-loop-containing protein BrxF [Caldalkalibacillus thermarum TA2.A1]	0	0	0	0	0	0	0	0	0	0	624000	1	0	0	0	0	0	0	0	0	0	0	0	0	0	0	0	0	0	0	0	0	0	0	0	0	0	0	0	0	0	0
1156	QZT34701.1	alpha-glucosidase [Caldalkalibacillus thermarum TA2.A1]	0	0	0	0	0	0	0	0	0	0	1570000	1	0	0	0	0	0	0	0	0	0	0	0	0	0	0	0	0	1590000	1	0	0	0	0	0	0	0	0	0	0	9000000	11
1157	QZT34175.1	thioredoxin family protein [Caldalkalibacillus thermarum TA2.A1]	0	0	0	0	0	0	0	0	0	0	0	0	5740000	1	0	0	0	0	0	0	0	0	0	0	0	0	0	0	0	0	0	0	0	0	0	0	0	0	0	0	60400000	5
1158	QZT34385.1	quinolinate synthase NadA [Caldalkalibacillus thermarum TA2.A1]	0	0	0	0	0	0	0	0	0	0	0	0	1040000	1	0	0	0	0	0	0	51700000	3	10000000	1	40000000	4	20200000	2	27000000	4	25600000	4	0	0	0	0	0	0	0	0	7680000	5
1159	QZT33393.1	deoxyribose-phosphate aldolase [Caldalkalibacillus thermarum TA2.A1]	0	0	0	0	0	0	0	0	0	0	0	0	7530000	2	0	0	3010000	1	0	0	0	0	0	0	0	0	0	0	3520000	1	0	0	0	0	0	0	0	0	5120000	1	155000000	10
1160	QZT35386.1	lipoyl(octanoyl) transferase LipB [Caldalkalibacillus thermarum TA2.A1]	0	0	0	0	0	0	0	0	0	0	0	0	3200000	1	0	0	54300000	1	51000000	1	32500000	1	49000000	1	22700000	2	23600000	2	57600000	3	24000000	2	7970000	1	0	0	0	0	0	0	61400000	7
1161	QZT32565.1	formate dehydrogenase accessory sulfurtransferase FdhD [Caldalkalibacillus thermarum TA2.A1]	0	0	0	0	0	0	0	0	0	0	0	0	11000000	1	0	0	7450000	1	0	0	0	0	0	0	0	0	0	0	0	0	0	0	0	0	0	0	0	0	0	0	0	0
1162	QZT35107.1	hypothetical protein HUR95_07760 [Caldalkalibacillus thermarum TA2.A1]	0	0	0	0	0	0	0	0	0	0	0	0	10900000	1	0	0	0	0	0	0	0	0	33600000	1	46600000	1	34100000	1	0	0	53900000	1	0	0	0	0	14100000	1	0	0	0	0
1163	QZT32812.1	ketoacyl-ACP synthase III [Caldalkalibacillus thermarum TA2.A1]	0	0	0	0	0	0	0	0	0	0	0	0	1370000	1	0	1	0	0	0	0	6930000	1	6110000	1	0	0	4340000	1	8040000	1	6800000	1	0	0	0	0	0	0	0	0	41300000	10
1164	QZT34877.1	NADPH dehydrogenase NamA [Caldalkalibacillus thermarum TA2.A1]	0	0	0	0	0	0	0	0	0	0	0	0	0	1	0	0	0	0	0	0	0	0	0	0	0	0	497000	2	0	0	813000	1	0	0	0	0	0	0	0	0	497000000	21
1165	QZT34818.1	IclR family transcriptional regulator [Caldalkalibacillus thermarum TA2.A1]	0	0	0	0	0	0	0	0	0	0	0	0	124000	1	0	0	3570000	1	0	0	2950000	1	2750000	1	0	0	2820000	1	3410000	1	2670000	1	0	0	0	0	0	0	0	0	722000	1
1166	QZT34260.1	replicative DNA helicase [Caldalkalibacillus thermarum TA2.A1]	0	0	0	0	0	0	0	0	0	0	0	0	1660000	1	0	0	0	0	0	0	0	0	0	0	0	0	0	0	0	0	0	0	0	0	0	0	0	0	0	0	15400000	9
1167	QZT34828.1	NAD(P)-dependent oxidoreductase [Caldalkalibacillus thermarum TA2.A1]	0	0	0	0	0	0	0	0	0	0	0	0	1100000	1	0	0	9730000	2	0	0	0	0	0	0	0	0	0	0	13200000	3	6850000	2	0	0	8060000	1	0	0	0	0	645000000	21
1168	QZT32763.1	FAD-binding oxidoreductase [Caldalkalibacillus thermarum TA2.A1]	0	0	0	0	0	0	0	0	0	0	0	0	718000	1	0	0	462000	1	0	0	0	0	0	0	3710000	1	0	0	0	0	0	0	0	0	0	0	0	0	0	0	0	0
1169	QZT32716.1	3-dehydroquinate synthase [Caldalkalibacillus thermarum TA2.A1]	0	0	0	0	0	0	0	0	0	0	0	0	166000	1	0	0	0	0	0	0	0	0	0	0	0	0	0	0	1770000	1	0	0	0	0	0	0	0	0	0	0	19400000	9
1170	QZT33297.1	helix-turn-helix domain-containing protein [Caldalkalibacillus thermarum TA2.A1]	0	0	0	0	0	0	0	0	0	0	0	0	2040000	1	0	0	0	0	0	0	0	0	0	0	0	0	0	0	0	0	0	0	0	0	0	0	0	0	0	0	2330000	2
1171	QZT32456.1	hypothetical protein HUR95_08455 [Caldalkalibacillus thermarum TA2.A1]	0	0	0	0	0	0	0	0	0	0	0	0	809000	1	0	0	668000	1	0	0	0	0	0	0	0	0	0	0	0	0	0	0	0	0	0	0	0	0	0	0	0	0
1172	QZT34355.1	MazG family protein [Caldalkalibacillus thermarum TA2.A1]	0	0	0	0	0	0	0	0	0	0	0	0	0	0	3830000	1	0	0	5280000	1	0	0	0	0	0	0	0	0	0	0	6820000	1	0	0	0	0	0	0	0	0	67600000	13
1173	QZT34270.1	EutN/CcmL family microcompartment protein [Caldalkalibacillus thermarum TA2.A1]	0	0	0	0	0	0	0	0	0	0	0	0	0	0	727000	1	1890000	1	1980000	1	0	0	0	0	0	0	0	0	774000	1	948000	1	0	0	0	0	0	0	0	0	14400000	3
1174	QZT34372.1	aminodeoxychorismate/anthranilate synthase component II [Caldalkalibacillus thermarum TA2.A1]	0	0	0	0	0	0	0	0	0	0	0	0	0	0	0	1	1560000	2	1650000	1	19200000	1	0	0	0	0	0	0	0	1	0	0	0	0	0	0	0	0	0	0	66700000	7
1175	QZT33358.1	Nif3-like dinuclear metal center hexameric protein [Caldalkalibacillus thermarum TA2.A1]	0	0	0	0	0	0	0	0	0	0	0	0	0	0	1270000	1	0	0	0	0	0	0	0	0	3850000	1	3700000	1	27200000	2	0	0	0	0	0	0	0	0	0	0	779000000	27
1176	QZT33109.1	DUF881 domain-containing protein [Caldalkalibacillus thermarum TA2.A1]	0	0	0	0	0	0	0	0	0	0	0	0	0	0	0	1	0	0	0	0	0	0	0	0	7320000	1	0	0	0	0	0	0	0	0	9140000	1	0	0	0	0	0	0
1177	QZT33519.1	type II secretion system F family protein [Caldalkalibacillus thermarum TA2.A1]	0	0	0	0	0	0	0	0	0	0	0	0	0	0	2600000	1	0	0	0	0	6700000	1	0	0	5830000	1	6620000	1	17100000	5	37400000	5	0	0	0	0	0	0	0	0	0	0
1178	QZT33479.1	cation diffusion facilitator family transporter [Caldalkalibacillus thermarum TA2.A1]	0	0	0	0	0	0	0	0	0	0	0	0	0	0	0	1	0	0	0	0	0	0	0	0	0	0	0	0	0	0	0	0	0	0	0	0	0	0	0	0	0	0
1179	QZT34869.1	RNA 2' 3'-cyclic phosphodiesterase [Caldalkalibacillus thermarum TA2.A1]	0	0	0	0	0	0	0	0	0	0	0	0	0	0	594000	1	529000	1	1030000	1	0	0	0	0	0	0	0	0	0	0	0	0	0	0	0	0	0	0	0	0	0	0
1180	QZT33104.1	hypothetical protein HUR95_12415 [Caldalkalibacillus thermarum TA2.A1]	0	0	0	0	0	0	0	0	0	0	0	0	0	0	9030000	1	0	0	0	0	0	0	0	0	0	0	0	0	0	0	51300000	1	0	0	0	0	0	0	0	0	0	0
1181	QZT32607.1	transposase [Caldalkalibacillus thermarum TA2.A1]	0	0	0	0	0	0	0	0	0	0	0	0	0	0	0	1	0	0	0	0	0	0	0	0	0	0	0	0	0	0	0	0	0	0	0	0	0	0	0	0	0	0
1182	QZT34544.1	aldo/keto reductase [Caldalkalibacillus thermarum TA2.A1]	0	0	0	0	0	0	0	0	0	0	0	0	0	0	0	0	71600000	6	58700000	4	0	0	0	0	0	0	0	0	98600000	7	62700000	4	0	0	41100000	2	0	0	0	0	212000000	20
1183	QZT35263.1	peptide-binding protein [Caldalkalibacillus thermarum TA2.A1]	0	0	0	0	0	0	0	0	0	0	0	0	0	0	0	0	103000000	9	70900000	1	0	0	0	0	0	0	0	0	49200000	3	20700000	4	61600000	3	0	0	0	0	0	0	158000000	20
1184	QZT33856.1	mechanosensitive ion channel family protein [Caldalkalibacillus thermarum TA2.A1]	0	0	0	0	0	0	0	0	0	0	0	0	0	0	0	0	16500000	3	11400000	3	0	0	0	0	0	0	0	0	0	0	0	0	0	0	0	0	0	0	0	0	21600000	8
1185	QZT34658.1	basic amino acid ABC transporter substrate-binding protein [Caldalkalibacillus thermarum TA2.A1]	0	0	0	0	0	0	0	0	0	0	0	0	0	0	0	0	26400000	2	17400000	1	0	0	0	0	0	0	0	0	4300000	1	0	0	0	0	0	0	0	0	0	0	18100000	3
1186	QZT33164.1	purine-nucleoside phosphorylase [Caldalkalibacillus thermarum TA2.A1]	0	0	0	0	0	0	0	0	0	0	0	0	0	0	0	0	3210000	2	0	0	0	0	0	0	0	0	0	0	1040000	1	0	0	0	0	0	0	0	0	0	0	124000000	9
1187	QZT33328.1	extracellular solute-binding protein [Caldalkalibacillus thermarum TA2.A1]	0	0	0	0	0	0	0	0	0	0	0	0	0	0	0	0	13400000	2	12800000	2	0	0	0	0	0	0	0	0	164000000	6	51200000	4	26000000	2	264000000	5	0	0	0	0	367000000	18
1188	QZT32553.1	TlpA family protein disulfide reductase [Caldalkalibacillus thermarum TA2.A1]	0	0	0	0	0	0	0	0	0	0	0	0	0	0	0	0	3600000	1	0	0	0	0	0	0	0	0	0	0	13700000	3	9080000	3	0	0	5060000	1	0	0	0	0	0	0
1189	QZT35382.1	acetyl-CoA carboxylase biotin carboxyl carrier protein [Caldalkalibacillus thermarum TA2.A1]	0	0	0	0	0	0	0	0	0	0	0	0	0	0	0	0	14100000	1	14000000	1	42000000	1	40200000	1	42100000	1	39900000	1	30600000	1	0	0	0	0	0	0	0	0	4060000	1	255000000	10
1190	QZT34580.1	tRNA (adenosine(37)-N6)-threonylcarbamoyltransferase complex dimerization subunit type 1 TsaB [Caldalkalibacillus thermarum TA2.A1]	0	0	0	0	0	0	0	0	0	0	0	0	0	0	0	0	4070000	1	2960000	1	0	0	0	0	0	0	0	0	0	0	0	0	0	0	0	0	0	0	0	0	30100000	10
1191	QZT35304.1	tRNA epoxyqueuosine(34) reductase QueG [Caldalkalibacillus thermarum TA2.A1]	0	0	0	0	0	0	0	0	0	0	0	0	0	0	0	0	1340000	1	0	0	0	0	0	0	0	0	0	0	1050000	1	0	0	0	0	0	0	0	0	0	0	0	0
1192	QZT33746.1	metal ABC transporter substrate-binding protein [Caldalkalibacillus thermarum TA2.A1]	0	0	0	0	0	0	0	0	0	0	0	0	0	0	0	0	14700000	1	7300000	2	0	0	0	0	0	0	0	0	2340000	2	7250000	2	0	0	0	0	0	0	0	0	544000000	13
1193	QZT32698.1	D-amino-acid transaminase [Caldalkalibacillus thermarum TA2.A1]	0	0	0	0	0	0	0	0	0	0	0	0	0	0	0	0	1020000	1	682000	1	0	0	0	0	0	0	0	0	0	0	0	0	0	0	0	0	0	0	0	0	1670000000	21
1194	QZT35243.1	M20 family metallo-hydrolase [Caldalkalibacillus thermarum TA2.A1]	0	0	0	0	0	0	0	0	0	0	0	0	0	0	0	0	0	1	0	0	0	0	0	0	0	0	0	0	0	0	0	0	0	0	0	0	0	0	0	0	63800000	14
1195	QZT32564.1	molybdenum cofactor guanylyltransferase [Caldalkalibacillus thermarum TA2.A1]	0	0	0	0	0	0	0	0	0	0	0	0	0	0	0	0	3240000	1	2400000	1	0	0	0	0	0	0	0	0	8920000	1	7540000	1	0	0	0	0	0	0	0	0	1960000	2
1196	QZT34522.1	ABC transporter permease [Caldalkalibacillus thermarum TA2.A1]	0	0	0	0	0	0	0	0	0	0	0	0	0	0	0	0	12100000	2	12800000	2	0	0	0	0	0	0	0	0	0	0	0	1	0	0	0	0	0	0	0	0	320000	1
1197	QZT34044.1	polysaccharide deacetylase family protein [Caldalkalibacillus thermarum TA2.A1]	0	0	0	0	0	0	0	0	0	0	0	0	0	0	0	0	6400000	1	0	0	0	0	0	0	0	0	0	0	599000	1	0	0	0	0	0	0	0	0	0	0	107000	1
1198	QZT34829.1	YciI family protein [Caldalkalibacillus thermarum TA2.A1]	0	0	0	0	0	0	0	0	0	0	0	0	0	0	0	0	7160000	1	0	0	0	0	0	0	0	0	0	0	11700000	1	8970000	1	3950000	1	0	0	0	0	0	0	392000000	10
1199	QZT34598.1	DUF58 domain-containing protein [Caldalkalibacillus thermarum TA2.A1]	0	0	0	0	0	0	0	0	0	0	0	0	0	0	0	0	5090000	1	5020000	1	0	0	0	0	0	0	0	0	625000	1	363000	1	0	0	0	0	0	0	0	0	0	0
1200	QZT33030.1	type I DNA topoisomerase [Caldalkalibacillus thermarum TA2.A1]	0	0	0	0	0	0	0	0	0	0	0	0	0	0	0	0	3710000	1	0	0	0	0	0	0	0	0	0	1	0	0	0	0	0	0	0	0	0	0	0	0	2460000	3
1201	QZT35526.1	cytochrome c [Caldalkalibacillus thermarum TA2.A1]	0	0	0	0	0	0	0	0	0	0	0	0	0	0	0	0	344000000	2	113000000	1	0	0	0	0	0	0	0	0	219000000	3	12000000	1	24800000	2	219000000	2	0	0	0	0	0	1
1202	QZT34647.1	NAD(P)H-hydrate dehydratase [Caldalkalibacillus thermarum TA2.A1]	0	0	0	0	0	0	0	0	0	0	0	0	0	0	0	0	2030000	1	0	0	0	0	0	0	0	0	0	0	10500000	2	3460000	1	0	0	0	0	0	0	0	0	409000000	26
1203	QZT33596.1	succinate dehydrogenase cytochrome b558 subunit [Caldalkalibacillus thermarum TA2.A1]	0	0	0	0	0	0	0	0	0	0	0	0	0	0	0	0	5720000	1	4600000	1	0	0	0	0	0	0	0	0	0	0	0	0	0	0	0	0	0	0	0	0	15600000	1
1204	QZT35360.1	globin [Caldalkalibacillus thermarum TA2.A1]	0	0	0	0	0	0	0	0	0	0	0	0	0	0	0	0	1080000	1	0	0	0	0	0	0	0	0	0	0	0	0	0	0	0	0	0	0	0	0	0	0	0	0
1205	QZT34030.1	aspartyl-phosphate phosphatase Spo0E family protein [Caldalkalibacillus thermarum TA2.A1]	0	0	0	0	0	0	0	0	0	0	0	0	0	0	0	0	530000	1	0	0	0	0	0	0	0	0	0	0	0	0	0	0	0	0	0	0	0	0	0	0	0	0
1206	QZT34636.1	hypothetical protein HUR95_04650 [Caldalkalibacillus thermarum TA2.A1]	0	0	0	0	0	0	0	0	0	0	0	0	0	0	0	0	3530000	1	2460000	1	0	0	0	0	2630000	1	19500000	2	13400000	2	0	1	0	0	17700000	1	0	0	15300000	2	10600000	2
1207	QZT35522.1	iron ABC transporter permease [Caldalkalibacillus thermarum TA2.A1]	0	0	0	0	0	0	0	0	0	0	0	0	0	0	0	0	13300000	1	10600000	1	0	0	0	0	0	0	0	0	0	0	0	0	0	0	0	0	0	0	0	0	543000	1
1208	QZT34237.1	N-6 DNA methylase [Caldalkalibacillus thermarum TA2.A1]	0	0	0	0	0	0	0	0	0	0	0	0	0	0	0	0	6480000	1	4260000	1	1060000	1	0	0	0	0	0	0	3050000	1	2010000	1	0	0	0	0	0	0	0	0	85600000	20
1209	QZT35133.1	hypothetical protein HUR95_07920 [Caldalkalibacillus thermarum TA2.A1]	0	0	0	0	0	0	0	0	0	0	0	0	0	0	0	0	277000	1	642000	1	0	0	0	0	7450000	1	8840000	2	59800000	5	24000000	4	7100000	1	19400000	2	0	0	1490000	1	21000000	7
1210	QZT32756.1	DNA topoisomerase IV subunit B [Caldalkalibacillus thermarum TA2.A1]	0	0	0	0	0	0	0	0	0	0	0	0	0	0	0	0	7580000	1	0	0	0	0	0	0	4850000	1	3750000	1	15600000	4	11200000	2	0	0	0	0	0	0	0	0	0	0
1211	QZT33096.1	RNA-binding protein [Caldalkalibacillus thermarum TA2.A1]	0	0	0	0	0	0	0	0	0	0	0	0	0	0	0	0	4180000	1	0	0	0	0	0	0	0	0	0	0	1380000	1	1100000	1	0	0	0	0	0	0	0	0	865000	2
1212	QZT32777.1	dihydroorotase [Caldalkalibacillus thermarum TA2.A1]	0	0	0	0	0	0	0	0	0	0	0	0	0	0	0	0	1500000	1	0	1	0	0	0	0	0	0	0	0	3060000	2	873000	1	0	0	0	0	0	0	0	0	19000000	7
1213	QZT35115.1	hypothetical protein HUR95_07830 [Caldalkalibacillus thermarum TA2.A1]	0	0	0	0	0	0	0	0	0	0	0	0	0	0	0	0	6930000	1	6000000	1	0	0	0	0	0	0	0	0	0	0	0	0	0	0	0	0	0	0	0	0	22400000	4
1214	QZT34300.1	S4 domain-containing protein YaaA [Caldalkalibacillus thermarum TA2.A1]	0	0	0	0	0	0	0	0	0	0	0	0	0	0	0	0	5060000	1	0	0	0	0	13100000	1	0	0	8830000	1	8420000	1	7660000	1	0	0	0	0	0	0	1580000	1	75800000	7
1215	QZT33174.1	SAM-dependent methyltransferase [Caldalkalibacillus thermarum TA2.A1]	0	0	0	0	0	0	0	0	0	0	0	0	0	0	0	0	300000	1	0	0	0	0	0	0	1630000	1	1850000	1	0	0	0	0	0	0	0	0	0	0	0	0	4570000	3
1216	QZT33322.1	ThiF family adenylyltransferase [Caldalkalibacillus thermarum TA2.A1]	0	0	0	0	0	0	0	0	0	0	0	0	0	0	0	0	2260000	1	3120000	1	4320000	2	426000	2	0	0	0	0	0	0	0	0	0	0	0	0	0	0	0	0	4790000	5
1217	QZT33497.1	ACT domain-containing protein [Caldalkalibacillus thermarum TA2.A1]	0	0	0	0	0	0	0	0	0	0	0	0	0	0	0	0	2330000	1	3000000	1	0	0	0	0	864000	1	0	0	0	0	0	0	0	0	0	0	0	0	0	0	5610000	6
1218	QZT35515.1	2-dehydro-3-deoxy-D-gluconate 5-dehydrogenase KduD [Caldalkalibacillus thermarum TA2.A1]	0	0	0	0	0	0	0	0	0	0	0	0	0	0	0	0	1060000	1	0	0	0	0	0	0	1420000	1	1140000	1	2600000	1	1870000	1	0	0	0	0	0	0	0	0	170000	1
1219	QZT35500.1	Fic family protein [Caldalkalibacillus thermarum TA2.A1]	0	0	0	0	0	0	0	0	0	0	0	0	0	0	0	0	1620000	1	0	0	0	0	0	0	0	0	0	0	0	0	0	0	0	0	0	0	0	0	0	0	8170000	7
1220	QZT34971.1	ketol-acid reductoisomerase [Caldalkalibacillus thermarum TA2.A1]	0	0	0	0	0	0	0	0	0	0	0	0	0	0	0	0	1600000	1	0	0	5120000	1	0	0	0	0	0	0	0	0	0	0	0	0	0	0	0	0	0	0	9710000000	32
1221	QZT34609.1	DUF2179 domain-containing protein [Caldalkalibacillus thermarum TA2.A1]	0	0	0	0	0	0	0	0	0	0	0	0	0	0	0	0	2100000	1	0	0	0	0	0	0	0	0	0	0	0	0	0	0	0	0	0	0	0	0	0	0	0	0
1222	QZT33650.1	hypothetical protein HUR95_15695 [Caldalkalibacillus thermarum TA2.A1]	0	0	0	0	0	0	0	0	0	0	0	0	0	0	0	0	18000000	1	17700000	1	0	0	3010000	1	0	0	0	0	26400000	2	17800000	1	0	0	0	0	0	0	0	0	89000000	5
1223	QZT33913.1	YpdA family putative bacillithiol disulfide reductase [Caldalkalibacillus thermarum TA2.A1]	0	0	0	0	0	0	0	0	0	0	0	0	0	0	0	0	244000	1	0	0	0	0	0	0	0	0	0	0	3360000	1	3170000	1	0	0	0	0	0	0	0	0	257000000	18
1224	QZT34310.1	IMP dehydrogenase [Caldalkalibacillus thermarum TA2.A1]	0	0	0	0	0	0	0	0	0	0	0	0	0	0	0	0	3820000	1	0	0	18400000	1	16800000	1	15400000	3	17100000	2	22400000	1	28000000	1	0	0	0	0	0	0	0	0	2370000000	37
1225	QZT35083.1	metal ABC transporter ATP-binding protein [Caldalkalibacillus thermarum TA2.A1]	0	0	0	0	0	0	0	0	0	0	0	0	0	0	0	0	10400000	1	0	0	0	0	0	0	0	0	0	0	0	0	0	0	0	0	0	0	0	0	0	0	0	0
1226	QZT33366.1	glycine--tRNA ligase subunit alpha [Caldalkalibacillus thermarum TA2.A1]	0	0	0	0	0	0	0	0	0	0	0	0	0	0	0	0	5900000	1	5450000	2	0	0	5900000	1	0	0	0	0	0	0	426000	1	0	0	0	0	0	0	0	0	115000000	13
1227	QZT32516.1	MBL fold metallo-hydrolase [Caldalkalibacillus thermarum TA2.A1]	0	0	0	0	0	0	0	0	0	0	0	0	0	0	0	0	0	1	0	0	0	0	0	0	0	0	0	0	0	0	0	0	0	0	0	0	0	0	0	0	0	0
1228	QZT32567.1	group-specific protein [Caldalkalibacillus thermarum TA2.A1]	0	0	0	0	0	0	0	0	0	0	0	0	0	0	0	0	379000	1	0	0	0	0	0	0	0	0	0	0	0	0	0	0	0	0	0	0	0	0	0	0	0	1
1229	QZT35405.1	ectoine synthase [Caldalkalibacillus thermarum TA2.A1]	0	0	0	0	0	0	0	0	0	0	0	0	0	0	0	0	4770000	1	0	0	0	0	0	0	0	0	0	0	0	0	0	0	0	0	0	0	0	0	0	0	0	0
1230	QZT33777.1	5-dehydro-4-deoxy-D-glucuronate isomerase [Caldalkalibacillus thermarum TA2.A1]	0	0	0	0	0	0	0	0	0	0	0	0	0	0	0	0	0	1	8670000	1	0	0	3630000	1	0	0	0	0	0	0	0	0	0	0	0	0	0	0	0	0	0	0
1231	QZT35103.1	phosphate propanoyltransferase [Caldalkalibacillus thermarum TA2.A1]	0	0	0	0	0	0	0	0	0	0	0	0	0	0	0	0	726000	1	0	0	0	0	0	0	2710000	1	2160000	1	6780000	1	5970000	1	0	0	0	0	0	0	0	0	736000000	12
1232	QZT33739.1	DUF3055 domain-containing protein [Caldalkalibacillus thermarum TA2.A1]	0	0	0	0	0	0	0	0	0	0	0	0	0	0	0	0	1040000	1	0	0	0	0	0	0	0	0	0	0	0	0	0	0	0	0	0	0	0	0	0	0	40500000	7
1233	QZT34665.1	trehalose operon repressor [Caldalkalibacillus thermarum TA2.A1]	0	0	0	0	0	0	0	0	0	0	0	0	0	0	0	0	642000	1	0	0	0	0	0	0	0	0	0	0	0	0	0	0	0	0	0	0	0	0	0	0	8530000	2
1234	QZT34541.1	MarR family transcriptional regulator [Caldalkalibacillus thermarum TA2.A1]	0	0	0	0	0	0	0	0	0	0	0	0	0	0	0	0	2480000	1	3120000	1	0	0	0	0	0	0	0	0	0	0	0	0	0	0	0	0	0	0	0	0	884000	1
1235	QZT33071.1	nitrile hydratase subunit beta [Caldalkalibacillus thermarum TA2.A1]	0	0	0	0	0	0	0	0	0	0	0	0	0	0	0	0	0	1	0	0	0	0	0	0	0	0	0	0	0	0	0	0	0	0	0	0	0	0	0	0	0	0
1236	QZT33024.1	flagellar basal body rod protein FlgC [Caldalkalibacillus thermarum TA2.A1]	0	0	0	0	0	0	0	0	0	0	0	0	0	0	0	0	0	1	0	0	0	0	0	0	0	0	0	0	0	0	0	0	0	0	0	0	0	0	0	0	0	0
1237	QZT33775.1	5-deoxy-glucuronate isomerase [Caldalkalibacillus thermarum TA2.A1]	0	0	0	0	0	0	0	0	0	0	0	0	0	0	0	0	0	1	0	0	0	0	0	0	2800000	1	0	0	0	0	0	0	0	0	0	0	0	0	0	0	2400000	3
1238	QZT32671.1	Glu/Leu/Phe/Val dehydrogenase [Caldalkalibacillus thermarum TA2.A1]	0	0	0	0	0	0	0	0	0	0	0	0	0	0	0	0	0	0	414000	2	0	0	0	0	0	0	0	0	10800000	2	9760000	2	0	0	0	0	0	0	0	0	597000000	22
1239	QZT34927.1	methyl-accepting chemotaxis protein [Caldalkalibacillus thermarum TA2.A1]	0	0	0	0	0	0	0	0	0	0	0	0	0	0	0	0	0	0	6150000	1	0	0	0	0	369000	1	0	0	0	0	0	0	0	0	0	0	2020000	1	0	0	0	0
1240	QZT33309.1	molybdopterin converting factor subunit 1 [Caldalkalibacillus thermarum TA2.A1]	0	0	0	0	0	0	0	0	0	0	0	0	0	0	0	0	0	0	2000000	1	0	0	0	0	0	0	0	0	0	0	0	0	0	0	0	0	0	0	0	0	35100000	3
1241	QZT34743.1	CRISPR-associated helicase Cas3' [Caldalkalibacillus thermarum TA2.A1]	0	0	0	0	0	0	0	0	0	0	0	0	0	0	0	0	0	0	1400000	1	0	0	0	0	0	0	0	0	2440000	1	2350000	2	0	0	0	0	0	0	0	0	0	0
1242	QZT35480.1	NAD(+) synthase [Caldalkalibacillus thermarum TA2.A1]	0	0	0	0	0	0	0	0	0	0	0	0	0	0	0	0	0	0	0	1	3590000	1	0	0	0	0	0	0	13500000	2	12500000	1	0	0	0	0	0	0	0	0	1270000000	17
1243	QZT32992.1	isoprenyl transferase [Caldalkalibacillus thermarum TA2.A1]	0	0	0	0	0	0	0	0	0	0	0	0	0	0	0	0	0	0	2370000	1	0	0	7040000	1	7650000	2	2430000	1	29800000	2	19200000	4	0	0	0	0	0	0	0	0	5660000	4
1244	QZT33477.1	adenine phosphoribosyltransferase [Caldalkalibacillus thermarum TA2.A1]	0	0	0	0	0	0	0	0	0	0	0	0	0	0	0	0	0	0	9030000	1	0	0	0	0	0	0	0	0	0	1	0	0	0	0	7420000	1	0	0	0	0	149000000	14
1245	QZT33882.1	phosphopyruvate hydratase [Caldalkalibacillus thermarum TA2.A1]	0	0	0	0	0	0	0	0	0	0	0	0	0	0	0	0	0	0	5290000	2	7490000	2	1450000	2	0	0	1500000	1	75500000	6	117000000	8	18100000	1	259000000	10	0	0	0	0	2710000000	30
1246	QZT32984.1	YlxR family protein [Caldalkalibacillus thermarum TA2.A1]	0	0	0	0	0	0	0	0	0	0	0	0	0	0	0	0	0	0	15500000	1	0	0	0	0	0	0	0	0	0	0	10500000	1	0	0	0	0	0	0	0	0	21900000	4
1247	QZT34143.1	flagellar hook-basal body protein [Caldalkalibacillus thermarum TA2.A1]	0	0	0	0	0	0	0	0	0	0	0	0	0	0	0	0	0	0	3140000	1	0	0	0	0	0	0	0	0	0	0	0	0	0	0	0	0	0	0	0	0	0	0
1248	QZT33202.1	YwiC-like family protein [Caldalkalibacillus thermarum TA2.A1]	0	0	0	0	0	0	0	0	0	0	0	0	0	0	0	0	0	0	3070000	1	0	0	0	0	0	0	0	0	0	0	0	0	0	0	0	0	0	0	0	0	0	0
1249	QZT33034.1	DNA/RNA nuclease SfsA [Caldalkalibacillus thermarum TA2.A1]	0	0	0	0	0	0	0	0	0	0	0	0	0	0	0	0	0	0	594000	1	4080000	1	4180000	1	5890000	1	6310000	1	11500000	2	69700000	3	0	0	0	0	0	0	0	0	471000	3
1250	QZT34837.1	DUF294 nucleotidyltransferase-like domain-containing protein [Caldalkalibacillus thermarum TA2.A1]	0	0	0	0	0	0	0	0	0	0	0	0	0	0	0	0	0	0	37600000	1	0	0	0	0	0	0	0	0	0	0	0	0	0	0	0	0	0	0	0	0	0	0
1251	QZT34930.1	sensor domain-containing diguanylate cyclase [Caldalkalibacillus thermarum TA2.A1]	0	0	0	0	0	0	0	0	0	0	0	0	0	0	0	0	0	0	361000	1	0	0	0	0	292000	1	0	0	666000	1	504000	1	0	0	0	0	0	0	0	0	0	0
1252	QZT34545.1	chromate transporter [Caldalkalibacillus thermarum TA2.A1]	0	0	0	0	0	0	0	0	0	0	0	0	0	0	0	0	0	0	2630000	1	0	0	0	0	0	0	0	0	0	0	0	0	0	0	0	0	0	0	0	0	0	0
1253	QZT32858.1	diaminobutyrate--2-oxoglutarate transaminase [Caldalkalibacillus thermarum TA2.A1]	0	0	0	0	0	0	0	0	0	0	0	0	0	0	0	0	0	0	0	1	0	0	0	0	0	0	0	0	0	0	0	0	0	0	0	0	0	0	0	0	0	0
1254	QZT34668.1	histidine phosphatase family protein [Caldalkalibacillus thermarum TA2.A1]	0	0	0	0	0	0	0	0	0	0	0	0	0	0	0	0	0	0	265000	1	9310000	2	2290000	1	4240000	1	2590000	1	4070000	1	1550000	1	0	0	0	0	0	0	0	0	72500000	8
1255	QZT32825.1	tRNA (guanosine(37)-N1)-methyltransferase TrmD [Caldalkalibacillus thermarum TA2.A1]	0	0	0	0	0	0	0	0	0	0	0	0	0	0	0	0	0	0	1060000	1	0	0	0	0	0	0	0	0	0	0	0	0	0	0	0	0	0	0	0	0	443000	1
1256	QZT34220.1	IS200/IS605 family element transposase accessory protein TnpB [Caldalkalibacillus thermarum TA2.A1]	0	0	0	0	0	0	0	0	0	0	0	0	0	0	0	0	0	0	911000	1	1230000	1	504000	1	4390000	1	0	0	3770000	1	4140000	2	0	0	0	0	0	0	0	0	7050000	5
1257	QZT34085.1	IS200/IS605 family element transposase accessory protein TnpB [Caldalkalibacillus thermarum TA2.A1]	0	0	0	0	0	0	0	0	0	0	0	0	0	0	0	0	0	0	911000	1	1230000	1	504000	1	4390000	1	0	0	3770000	1	4140000	2	0	0	0	0	0	0	0	0	7050000	5
1258	QZT33770.1	IS200/IS605 family element transposase accessory protein TnpB [Caldalkalibacillus thermarum TA2.A1]	0	0	0	0	0	0	0	0	0	0	0	0	0	0	0	0	0	0	911000	1	1230000	1	504000	1	4390000	1	0	0	3770000	1	4140000	2	0	0	0	0	0	0	0	0	7050000	5
1259	QZT33510.1	rod shape-determining protein MreD [Caldalkalibacillus thermarum TA2.A1]	0	0	0	0	0	0	0	0	0	0	0	0	0	0	0	0	0	0	1550000	1	0	0	0	0	0	0	0	0	0	0	0	0	0	0	0	0	0	0	0	0	175000	1
1260	QZT33420.1	YqeG family HAD IIIA-type phosphatase [Caldalkalibacillus thermarum TA2.A1]	0	0	0	0	0	0	0	0	0	0	0	0	0	0	0	0	0	0	2200000	1	0	0	0	0	0	0	0	0	0	0	1980000	1	0	0	0	0	0	0	0	0	0	0
1261	QZT34438.1	50S ribosomal protein L30 [Caldalkalibacillus thermarum TA2.A1]	0	0	0	0	0	0	0	0	0	0	0	0	0	0	0	0	0	0	0	0	656000000	4	541000000	4	49400000	3	405000000	4	0	0	231000000	1	0	0	1180000000	5	0	0	0	0	75700000	5
1262	QZT32942.1	YlbF family regulator [Caldalkalibacillus thermarum TA2.A1]	0	0	0	0	0	0	0	0	0	0	0	0	0	0	0	0	0	0	0	0	23400000	2	12200000	2	18400000	3	17900000	3	4800000	2	0	0	0	0	30400000	4	0	0	2750000	1	59400000	5
1263	QZT33362.1	RNA polymerase sigma factor RpoD [Caldalkalibacillus thermarum TA2.A1]	0	0	0	0	0	0	0	0	0	0	0	0	0	0	0	0	0	0	0	0	23400000	3	15100000	2	23800000	4	14200000	3	3590000	2	9620000	3	0	0	22200000	2	0	0	0	0	25800000	10
1264	QZT32536.1	DUF84 family protein [Caldalkalibacillus thermarum TA2.A1]	0	0	0	0	0	0	0	0	0	0	0	0	0	0	0	0	0	0	0	0	11400000	2	4400000	1	5520000	1	3580000	1	14100000	2	10700000	2	0	0	0	0	0	0	0	0	8330000	6
1265	QZT33120.1	16S rRNA (cytosine(1402)-N(4))-methyltransferase RsmH [Caldalkalibacillus thermarum TA2.A1]	0	0	0	0	0	0	0	0	0	0	0	0	0	0	0	0	0	0	0	0	24700000	2	21900000	2	0	0	13800000	2	13100000	3	10000000	2	0	0	0	0	0	0	0	0	2270000	3
1266	QZT34555.1	anti-sigma B factor RsbW [Caldalkalibacillus thermarum TA2.A1]	0	0	0	0	0	0	0	0	0	0	0	0	0	0	0	0	0	0	0	0	21600000	3	21800000	3	15800000	1	8650000	4	42100000	5	24500000	3	0	0	0	0	0	0	0	0	14300000	6
1267	QZT33629.1	divergent PAP2 family protein [Caldalkalibacillus thermarum TA2.A1]	0	0	0	0	0	0	0	0	0	0	0	0	0	0	0	0	0	0	0	0	1970000	1	1340000	1	0	0	836000	1	0	0	2270000	1	0	0	0	0	0	0	0	0	5040000	3
1268	QZT33311.1	molybdopterin molybdotransferase MoeA [Caldalkalibacillus thermarum TA2.A1]	0	0	0	0	0	0	0	0	0	0	0	0	0	0	0	0	0	0	0	0	5360000	2	1310000	1	4050000	1	4380000	1	10900000	3	4590000	1	0	0	0	0	0	0	0	0	187000000	17
1269	QZT32637.1	hypothetical protein HUR95_09525 [Caldalkalibacillus thermarum TA2.A1]	0	0	0	0	0	0	0	0	0	0	0	0	0	0	0	0	0	0	0	0	14200000	1	10500000	1	0	0	0	0	0	0	0	0	0	0	18300000	1	0	0	0	0	0	0
1270	QZT33822.1	Uma2 family endonuclease [Caldalkalibacillus thermarum TA2.A1]	0	0	0	0	0	0	0	0	0	0	0	0	0	0	0	0	0	0	0	0	4160000	1	3420000	1	3780000	1	3210000	1	5450000	1	0	0	0	0	0	0	0	0	0	0	79600000	11
1271	QZT34737.1	IS1634 family transposase [Caldalkalibacillus thermarum TA2.A1]	0	0	0	0	0	0	0	0	0	0	0	0	0	0	0	0	0	0	0	0	8170000	1	0	0	0	0	0	0	4570000	1	4040000	1	0	0	5090000	1	0	0	0	0	1020000	2
1272	QZT34505.1	IS1634 family transposase [Caldalkalibacillus thermarum TA2.A1]	0	0	0	0	0	0	0	0	0	0	0	0	0	0	0	0	0	0	0	0	8170000	1	0	0	0	0	0	0	4570000	1	4040000	1	0	0	0	0	0	0	0	0	1020000	2
1273	QZT35313.1	CRISPR-associated protein Cas4 [Caldalkalibacillus thermarum TA2.A1]	0	0	0	0	0	0	0	0	0	0	0	0	0	0	0	0	0	0	0	0	13000000	2	14100000	2	5590000	1	6350000	1	7580000	1	6070000	1	0	0	0	0	0	0	0	0	0	0
1274	QZT33380.1	GatB/YqeY domain-containing protein [Caldalkalibacillus thermarum TA2.A1]	0	0	0	0	0	0	0	0	0	0	0	0	0	0	0	0	0	0	0	0	9610000	2	6720000	2	0	0	1250000	1	4620000	1	5790000	1	0	0	0	0	0	0	7340000	1	111000000	6
1275	QZT34195.1	response regulator [Caldalkalibacillus thermarum TA2.A1]	0	0	0	0	0	0	0	0	0	0	0	0	0	0	0	0	0	0	0	0	11500000	2	1450000	1	4680000	1	3080000	1	41800000	4	32500000	3	0	0	0	0	0	0	0	0	4700000	3
1276	QZT33124.1	2-dehydropantoate 2-reductase [Caldalkalibacillus thermarum TA2.A1]	0	0	0	0	0	0	0	0	0	0	0	0	0	0	0	0	0	0	0	0	2750000	2	5050000	1	0	0	0	0	0	0	0	0	0	0	0	0	0	0	0	0	2570000	2
1277	QZT34294.1	membrane protein insertase YidC [Caldalkalibacillus thermarum TA2.A1]	0	0	0	0	0	0	0	0	0	0	0	0	0	0	0	0	0	0	0	0	73900000	1	0	0	52000000	1	53800000	1	66000000	1	51600000	1	0	0	0	0	0	0	13600000	1	0	0
1278	QZT33315.1	nucleotidyltransferase family protein [Caldalkalibacillus thermarum TA2.A1]	0	0	0	0	0	0	0	0	0	0	0	0	0	0	0	0	0	0	0	0	8080000	1	16000000	2	3620000	1	0	0	3460000	1	3040000	1	0	0	0	0	0	0	0	0	0	0
1279	QZT34756.1	type I-B CRISPR-associated endonuclease Cas1b [Caldalkalibacillus thermarum TA2.A1]	0	0	0	0	0	0	0	0	0	0	0	0	0	0	0	0	0	0	0	0	0	1	5140000	1	6380000	1	5340000	1	6590000	1	0	1	0	0	0	0	0	0	0	0	0	0
1280	QZT35125.1	PHP domain-containing protein [Caldalkalibacillus thermarum TA2.A1]	0	0	0	0	0	0	0	0	0	0	0	0	0	0	0	0	0	0	0	0	1580000	2	0	0	0	0	0	0	0	0	0	0	0	0	0	0	0	0	0	0	6160000	6
1281	QZT33457.1	uridine kinase [Caldalkalibacillus thermarum TA2.A1]	0	0	0	0	0	0	0	0	0	0	0	0	0	0	0	0	0	0	0	0	11300000	2	12000000	1	0	0	1930000	1	0	0	0	1	0	0	0	0	0	0	0	0	0	0
1282	QZT34614.1	phosphoribosylformylglycinamidine synthase subunit PurS [Caldalkalibacillus thermarum TA2.A1]	0	0	0	0	0	0	0	0	0	0	0	0	0	0	0	0	0	0	0	0	29000000	2	22500000	2	36700000	3	9140000	1	38500000	3	23300000	2	0	0	24000000	3	0	0	0	0	8960000	4
1283	QZT34429.1	30S ribosomal protein S17 [Caldalkalibacillus thermarum TA2.A1]	0	0	0	0	0	0	0	0	0	0	0	0	0	0	0	0	0	0	0	0	32200000	1	33600000	2	0	0	46100000	1	64200000	1	0	0	0	0	107000000	2	86700000	3	0	0	43000000	3
1284	QZT33462.1	IreB family regulatory phosphoprotein [Caldalkalibacillus thermarum TA2.A1]	0	0	0	0	0	0	0	0	0	0	0	0	0	0	0	0	0	0	0	0	2870000	1	3670000	2	14900000	3	13800000	3	25200000	2	21400000	2	27600000	1	13900000	1	0	0	8110000	1	93700000	5
1285	QZT33963.1	flagellar assembly protein FliW [Caldalkalibacillus thermarum TA2.A1]	0	0	0	0	0	0	0	0	0	0	0	0	0	0	0	0	0	0	0	0	2970000	1	2530000	1	4330000	1	4270000	1	0	0	0	0	0	0	0	0	0	0	0	0	12400000	3
1286	QZT32682.1	sulfurtransferase [Caldalkalibacillus thermarum TA2.A1]	0	0	0	0	0	0	0	0	0	0	0	0	0	0	0	0	0	0	0	0	3060000	1	0	1	418000	1	1060000	1	7320000	2	0	0	0	0	0	0	0	0	0	0	19100000	6
1287	QZT32851.1	1 4-dihydroxy-2-naphthoate polyprenyltransferase [Caldalkalibacillus thermarum TA2.A1]	0	0	0	0	0	0	0	0	0	0	0	0	0	0	0	0	0	0	0	0	16200000	1	0	0	14500000	1	14700000	1	16200000	1	0	0	0	0	0	0	0	0	0	0	3700000	1
1288	QZT32939.1	DNA mismatch repair protein MutS [Caldalkalibacillus thermarum TA2.A1]	0	0	0	0	0	0	0	0	0	0	0	0	0	0	0	0	0	0	0	0	1490000	1	1560000	1	1080000	2	0	0	0	0	0	0	0	0	0	0	0	0	0	0	9050000	11
1289	QZT35114.1	oligoendopeptidase F [Caldalkalibacillus thermarum TA2.A1]	0	0	0	0	0	0	0	0	0	0	0	0	0	0	0	0	0	0	0	0	1850000	1	1810000	1	0	0	0	0	0	0	0	0	0	0	0	0	0	0	0	0	31400000	15
1290	QZT34132.1	AbgT family transporter [Caldalkalibacillus thermarum TA2.A1]	0	0	0	0	0	0	0	0	0	0	0	0	0	0	0	0	0	0	0	0	26800000	1	25800000	1	19000000	1	20600000	1	23800000	1	17600000	1	0	0	0	0	0	0	4580000	1	80400000	8
1291	QZT32524.1	rRNA pseudouridine synthase [Caldalkalibacillus thermarum TA2.A1]	0	0	0	0	0	0	0	0	0	0	0	0	0	0	0	0	0	0	0	0	8700000	1	8120000	2	17700000	2	16100000	2	9490000	1	6350000	2	0	0	0	0	0	0	0	0	2140000	2
1292	QZT34696.1	peroxide-responsive transcriptional repressor PerR [Caldalkalibacillus thermarum TA2.A1]	0	0	0	0	0	0	0	0	0	0	0	0	0	0	0	0	0	0	0	0	0	1	1490000	1	3790000	1	0	0	27800000	1	14200000	2	8780000	1	0	0	0	0	4130000	1	8560000	2
1293	QZT33255.1	hypothetical protein HUR95_13290 [Caldalkalibacillus thermarum TA2.A1]	0	0	0	0	0	0	0	0	0	0	0	0	0	0	0	0	0	0	0	0	13900000	1	14600000	1	11900000	1	11100000	1	18700000	1	24100000	2	0	0	0	0	0	0	0	0	0	0
1294	QZT35352.1	MoxR family ATPase [Caldalkalibacillus thermarum TA2.A1]	0	0	0	0	0	0	0	0	0	0	0	0	0	0	0	0	0	0	0	0	3020000	1	0	0	2210000	1	2250000	1	0	1	0	1	0	0	0	0	0	0	0	0	9390000	6
1295	QZT34357.1	RNA-binding S4 domain-containing protein [Caldalkalibacillus thermarum TA2.A1]	0	0	0	0	0	0	0	0	0	0	0	0	0	0	0	0	0	0	0	0	6340000	1	5530000	1	5720000	1	6440000	1	10600000	1	11600000	1	0	0	0	0	0	0	0	0	15200000	2
1296	QZT32662.1	DNA repair protein RecN [Caldalkalibacillus thermarum TA2.A1]	0	0	0	0	0	0	0	0	0	0	0	0	0	0	0	0	0	0	0	0	0	1	1170000	1	6120000	2	7540000	2	2540000	1	3340000	2	0	0	0	0	0	0	0	0	133000000	26
1297	QZT33925.1	methionine biosynthesis PLP-dependent protein [Caldalkalibacillus thermarum TA2.A1]	0	0	0	0	0	0	0	0	0	0	0	0	0	0	0	0	0	0	0	0	243000	1	0	0	0	0	0	0	1190000	1	0	0	0	0	0	0	0	0	0	0	55600000	15
1298	QZT32850.1	LysR family transcriptional regulator [Caldalkalibacillus thermarum TA2.A1]	0	0	0	0	0	0	0	0	0	0	0	0	0	0	0	0	0	0	0	0	3070000	1	0	0	828000	1	0	0	0	1	0	0	0	0	0	0	0	0	0	0	32900000	4
1299	QZT34986.1	RNA methyltransferase [Caldalkalibacillus thermarum TA2.A1]	0	0	0	0	0	0	0	0	0	0	0	0	0	0	0	0	0	0	0	0	0	1	5360000	2	0	0	0	0	5890000	1	5410000	1	0	0	0	0	0	0	0	0	0	0
1300	QZT35308.1	CRISPR-associated protein Cas4 [Caldalkalibacillus thermarum TA2.A1]	0	0	0	0	0	0	0	0	0	0	0	0	0	0	0	0	0	0	0	0	8580000	1	8440000	1	0	0	0	0	15300000	2	11400000	2	0	0	0	0	0	0	0	0	583000	1
1301	QZT32957.1	RecX family transcriptional regulator [Caldalkalibacillus thermarum TA2.A1]	0	0	0	0	0	0	0	0	0	0	0	0	0	0	0	0	0	0	0	0	10800000	1	11000000	2	10200000	2	9190000	2	4200000	1	10600000	2	0	0	0	0	0	0	0	0	16600000	5
1302	QZT32778.1	carbamoyl phosphate synthase small subunit [Caldalkalibacillus thermarum TA2.A1]	0	0	0	0	0	0	0	0	0	0	0	0	0	0	0	0	0	0	0	0	1460000	1	1060000	1	0	0	2920000	1	0	0	0	0	0	0	0	0	0	0	0	0	0	0
1303	QZT33286.1	hypothetical protein HUR95_13485 [Caldalkalibacillus thermarum TA2.A1]	0	0	0	0	0	0	0	0	0	0	0	0	0	0	0	0	0	0	0	0	3540000	1	0	0	0	0	0	0	0	1	0	0	0	0	0	0	0	0	0	0	0	0
1304	QZT35484.1	ribonuclease PH [Caldalkalibacillus thermarum TA2.A1]	0	0	0	0	0	0	0	0	0	0	0	0	0	0	0	0	0	0	0	0	1530000	1	5330000	2	0	0	6040000	3	9830000	2	6830000	3	0	0	0	0	0	0	0	0	565000000	14
1305	QZT34224.1	GntR family transcriptional regulator [Caldalkalibacillus thermarum TA2.A1]	0	0	0	0	0	0	0	0	0	0	0	0	0	0	0	0	0	0	0	0	3380000	1	0	0	0	0	1930000	1	2370000	1	0	0	0	0	0	0	0	0	0	0	612000	2
1306	QZT32823.1	KH domain-containing protein [Caldalkalibacillus thermarum TA2.A1]	0	0	0	0	0	0	0	0	0	0	0	0	0	0	0	0	0	0	0	0	6440000	1	0	0	4040000	1	0	0	2880000	1	2440000	1	0	0	9430000	2	2000000	1	0	0	2220000	3
1307	QZT35472.1	nucleotide exchange factor GrpE [Caldalkalibacillus thermarum TA2.A1]	0	0	0	0	0	0	0	0	0	0	0	0	0	0	0	0	0	0	0	0	36100000	1	0	0	29700000	1	0	0	0	0	0	0	0	0	0	0	0	0	0	0	261000000	9
1308	QZT34960.1	DnaD domain protein [Caldalkalibacillus thermarum TA2.A1]	0	0	0	0	0	0	0	0	0	0	0	0	0	0	0	0	0	0	0	0	2520000	1	2970000	1	9940000	2	7880000	2	11400000	1	8580000	2	0	0	10300000	2	0	0	0	0	1390000	4
1309	QZT35193.1	hypothetical protein HUR95_08295 [Caldalkalibacillus thermarum TA2.A1]	0	0	0	0	0	0	0	0	0	0	0	0	0	0	0	0	0	0	0	0	37200000	1	0	0	0	0	0	0	0	0	0	0	0	0	0	0	0	0	0	0	0	0
1310	QZT33697.1	hypothetical protein HUR95_15970 [Caldalkalibacillus thermarum TA2.A1]	0	0	0	0	0	0	0	0	0	0	0	0	0	0	0	0	0	0	0	0	1670000	1	3310000	2	0	0	0	0	0	0	0	0	0	0	0	0	0	0	0	0	42100000	4
1311	QZT32797.1	bifunctional phosphopantothenoylcysteine decarboxylase/phosphopantothenate--cysteine ligase CoaBC [Caldalkalibacillus thermarum TA2.A1]	0	0	0	0	0	0	0	0	0	0	0	0	0	0	0	0	0	0	0	0	10500000	1	8560000	1	11000000	2	856000	1	23400000	3	8610000	1	0	0	0	0	0	0	0	0	42100000	10
1312	QZT33734.1	cysteine synthase A [Caldalkalibacillus thermarum TA2.A1]	0	0	0	0	0	0	0	0	0	0	0	0	0	0	0	0	0	0	0	0	5430000	1	5030000	1	5830000	1	0	1	3860000	1	0	0	0	0	0	0	0	0	0	0	9060000	6
1313	QZT33274.1	cold-shock protein [Caldalkalibacillus thermarum TA2.A1]	0	0	0	0	0	0	0	0	0	0	0	0	0	0	0	0	0	0	0	0	7570000	1	0	0	3680000	1	0	0	5140000	1	0	0	0	0	0	0	0	0	0	0	50500000	3
1314	QZT32933.1	YwhD family protein [Caldalkalibacillus thermarum TA2.A1]	0	0	0	0	0	0	0	0	0	0	0	0	0	0	0	0	0	0	0	0	14900000	1	16000000	1	22100000	2	26800000	3	18400000	2	7690000	1	0	0	28800000	1	0	0	0	0	725000000	11
1315	QZT34281.1	IS110 family transposase [Caldalkalibacillus thermarum TA2.A1]	0	0	0	0	0	0	0	0	0	0	0	0	0	0	0	0	0	0	0	0	0	1	0	0	0	1	0	0	0	1	0	0	0	0	0	0	0	0	0	0	1150000	2
1316	QZT34233.1	type I restriction endonuclease subunit R [Caldalkalibacillus thermarum TA2.A1]	0	0	0	0	0	0	0	0	0	0	0	0	0	0	0	0	0	0	0	0	785000	1	0	0	0	0	0	0	0	0	0	0	0	0	0	0	0	0	0	0	2100000	8
1317	QZT32913.1	sulfurtransferase TusA family protein [Caldalkalibacillus thermarum TA2.A1]	0	0	0	0	0	0	0	0	0	0	0	0	0	0	0	0	0	0	0	0	0	1	0	0	2820000	1	2970000	1	5460000	2	5450000	2	0	0	0	0	0	0	0	0	955000000	14
1318	QZT33660.1	hypothetical protein HUR95_15750 [Caldalkalibacillus thermarum TA2.A1]	0	0	0	0	0	0	0	0	0	0	0	0	0	0	0	0	0	0	0	0	3030000	1	3940000	1	0	0	0	0	0	0	0	0	0	0	0	0	0	0	0	0	0	1
1319	QZT34812.1	hypothetical protein HUR95_05980 [Caldalkalibacillus thermarum TA2.A1]	0	0	0	0	0	0	0	0	0	0	0	0	0	0	0	0	0	0	0	0	0	1	0	0	0	0	0	0	0	0	0	0	0	0	0	0	0	0	0	0	0	0
1320	QZT33586.1	3-oxoacyl-ACP reductase FabG [Caldalkalibacillus thermarum TA2.A1]	0	0	0	0	0	0	0	0	0	0	0	0	0	0	0	0	0	0	0	0	0	1	0	0	1420000	1	1140000	1	2600000	1	1870000	1	0	0	0	0	0	0	0	0	0	0
1321	QZT34274.1	BMC domain-containing protein [Caldalkalibacillus thermarum TA2.A1]	0	0	0	0	0	0	0	0	0	0	0	0	0	0	0	0	0	0	0	0	1910000	1	0	0	0	0	0	0	0	0	0	0	0	0	0	0	0	0	0	0	0	0
1322	QZT33154.1	peptidylprolyl isomerase [Caldalkalibacillus thermarum TA2.A1]	0	0	0	0	0	0	0	0	0	0	0	0	0	0	0	0	0	0	0	0	1720000	1	0	1	0	0	0	0	0	0	3000000	1	0	0	0	0	0	0	0	0	1460000	1
1323	QZT34790.1	acyl-CoA dehydrogenase family protein [Caldalkalibacillus thermarum TA2.A1]	0	0	0	0	0	0	0	0	0	0	0	0	0	0	0	0	0	0	0	0	0	1	0	0	0	0	0	0	1800000	1	0	0	0	0	0	0	0	0	0	0	21100000	10
1324	QZT33919.1	anthranilate phosphoribosyltransferase [Caldalkalibacillus thermarum TA2.A1]	0	0	0	0	0	0	0	0	0	0	0	0	0	0	0	0	0	0	0	0	4650000	1	0	0	0	0	0	0	0	0	0	0	0	0	0	0	0	0	0	0	172000000	16
1325	QZT34778.1	NUDIX domain-containing protein [Caldalkalibacillus thermarum TA2.A1]	0	0	0	0	0	0	0	0	0	0	0	0	0	0	0	0	0	0	0	0	0	1	0	0	0	0	0	0	0	0	0	0	0	0	0	0	0	0	0	0	0	0
1326	QZT33513.1	Maf family protein [Caldalkalibacillus thermarum TA2.A1]	0	0	0	0	0	0	0	0	0	0	0	0	0	0	0	0	0	0	0	0	4500000	1	5020000	1	12700000	1	13600000	1	14100000	1	13000000	1	0	0	0	0	0	0	4290000	1	4990000	5
1327	QZT32854.1	2-succinyl-6-hydroxy-2 4-cyclohexadiene-1-carboxylate synthase [Caldalkalibacillus thermarum TA2.A1]	0	0	0	0	0	0	0	0	0	0	0	0	0	0	0	0	0	0	0	0	0	1	0	0	0	0	0	0	0	0	0	0	0	0	0	0	0	0	0	0	0	0
1328	QZT32549.1	cadmium-translocating P-type ATPase [Caldalkalibacillus thermarum TA2.A1]	0	0	0	0	0	0	0	0	0	0	0	0	0	0	0	0	0	0	0	0	1090000	1	0	0	309000	1	0	0	1430000	1	0	0	0	0	0	0	0	0	0	0	4940000	6
1329	QZT33455.1	penicillin-binding protein 2 [Caldalkalibacillus thermarum TA2.A1]	0	0	0	0	0	0	0	0	0	0	0	0	0	0	0	0	0	0	0	0	0	1	0	0	0	0	0	0	0	0	0	0	0	0	0	0	0	0	0	0	0	0
1330	QZT35161.1	hypothetical protein HUR95_08115 [Caldalkalibacillus thermarum TA2.A1]	0	0	0	0	0	0	0	0	0	0	0	0	0	0	0	0	0	0	0	0	13200000	1	13700000	1	9360000	1	0	0	0	1	0	0	0	0	0	0	0	0	0	0	13700000	3
1331	QZT34124.1	M20 family metallopeptidase [Caldalkalibacillus thermarum TA2.A1]	0	0	0	0	0	0	0	0	0	0	0	0	0	0	0	0	0	0	0	0	234000	1	0	0	0	0	2190000	1	0	0	0	0	0	0	0	0	0	0	0	0	6740000	1
1332	QZT34343.1	4-(cytidine 5'-diphospho)-2-C-methyl-D-erythritol kinase [Caldalkalibacillus thermarum TA2.A1]	0	0	0	0	0	0	0	0	0	0	0	0	0	0	0	0	0	0	0	0	7470000	1	0	0	0	0	0	0	765000	1	0	1	0	0	0	0	0	0	0	0	5130000	3
1333	QZT32648.1	stage III sporulation protein AF [Caldalkalibacillus thermarum TA2.A1]	0	0	0	0	0	0	0	0	0	0	0	0	0	0	0	0	0	0	0	0	0	1	0	0	0	0	0	0	0	0	0	0	0	0	0	0	0	0	0	0	0	0
1334	QZT32520.1	ferredoxin [Caldalkalibacillus thermarum TA2.A1]	0	0	0	0	0	0	0	0	0	0	0	0	0	0	0	0	0	0	0	0	24700000	1	22200000	1	0	0	0	0	0	0	0	0	0	0	567000000	1	0	0	0	0	387000000	2
1335	QZT33773.1	dihydrodipicolinate synthase family protein [Caldalkalibacillus thermarum TA2.A1]	0	0	0	0	0	0	0	0	0	0	0	0	0	0	0	0	0	0	0	0	0	0	0	1	0	0	0	0	0	0	6800000	1	0	0	0	0	0	0	0	0	164000000	15
1336	QZT35247.1	thymidine kinase [Caldalkalibacillus thermarum TA2.A1]	0	0	0	0	0	0	0	0	0	0	0	0	0	0	0	0	0	0	0	0	0	0	1290000	1	0	0	0	0	0	0	0	0	0	0	0	0	0	0	0	0	19600000	6
1337	QZT35260.1	sugar ABC transporter ATP-binding protein [Caldalkalibacillus thermarum TA2.A1]	0	0	0	0	0	0	0	0	0	0	0	0	0	0	0	0	0	0	0	0	0	0	1510000	1	0	0	1850000	2	0	0	0	0	0	0	0	0	0	0	0	0	22200	1
1338	QZT33944.1	acetyltransferase [Caldalkalibacillus thermarum TA2.A1]	0	0	0	0	0	0	0	0	0	0	0	0	0	0	0	0	0	0	0	0	0	0	1190000	1	0	0	0	0	0	0	0	0	0	0	0	0	0	0	0	0	1380000	1
1339	QZT34324.1	recombination mediator RecR [Caldalkalibacillus thermarum TA2.A1]	0	0	0	0	0	0	0	0	0	0	0	0	0	0	0	0	0	0	0	0	0	0	2570000	1	1600000	1	1900000	1	0	0	0	0	0	0	0	0	0	0	0	0	4080000	3
1340	QZT32588.1	preQ(1) synthase [Caldalkalibacillus thermarum TA2.A1]	0	0	0	0	0	0	0	0	0	0	0	0	0	0	0	0	0	0	0	0	0	0	12400000	1	0	0	0	0	0	0	0	0	0	0	0	0	0	0	0	0	199000000	8
1341	QZT32623.1	(d)CMP kinase [Caldalkalibacillus thermarum TA2.A1]	0	0	0	0	0	0	0	0	0	0	0	0	0	0	0	0	0	0	0	0	0	0	4350000	1	0	1	2240000	1	0	0	4700000	1	0	0	0	0	0	0	0	0	38100000	9
1342	QZT34415.1	50S ribosomal protein L7ae-like protein [Caldalkalibacillus thermarum TA2.A1]	0	0	0	0	0	0	0	0	0	0	0	0	0	0	0	0	0	0	0	0	0	0	2220000	1	0	0	10500000	1	19900000	2	11200000	1	0	0	0	0	0	0	0	0	98400000	3
1343	QZT34219.1	ion transporter [Caldalkalibacillus thermarum TA2.A1]	0	0	0	0	0	0	0	0	0	0	0	0	0	0	0	0	0	0	0	0	0	0	266000	1	0	0	0	0	0	0	0	0	0	0	0	0	0	0	0	0	0	0
1344	QZT34234.1	restriction endonuclease subunit S [Caldalkalibacillus thermarum TA2.A1]	0	0	0	0	0	0	0	0	0	0	0	0	0	0	0	0	0	0	0	0	0	0	2240000	1	0	0	0	0	0	0	0	0	0	0	0	0	0	0	0	0	0	0
1345	QZT32601.1	inorganic diphosphatase [Caldalkalibacillus thermarum TA2.A1]	0	0	0	0	0	0	0	0	0	0	0	0	0	0	0	0	0	0	0	0	0	0	0	1	0	0	0	0	759000	1	0	0	0	0	8340000	2	0	0	5710000	1	1500000000	17
1346	QZT33015.1	flagellar hook-basal body complex protein [Caldalkalibacillus thermarum TA2.A1]	0	0	0	0	0	0	0	0	0	0	0	0	0	0	0	0	0	0	0	0	0	0	854000	1	1080000	1	954000	1	0	0	1050000	1	0	0	0	0	0	0	0	0	0	0
1347	QZT34461.1	hydroxyphenylacetyl-CoA thioesterase PaaI [Caldalkalibacillus thermarum TA2.A1]	0	0	0	0	0	0	0	0	0	0	0	0	0	0	0	0	0	0	0	0	0	0	466000	1	1110000	1	934000	1	0	0	0	0	0	0	0	0	0	0	0	0	34200000	3
1348	QZT32672.1	dihydrolipoyl dehydrogenase [Caldalkalibacillus thermarum TA2.A1]	0	0	0	0	0	0	0	0	0	0	0	0	0	0	0	0	0	0	0	0	0	0	1780000	1	702000	1	0	0	0	0	2870000	1	0	0	0	0	0	0	0	0	316000000	19
1349	QZT35060.1	5'-methylthioadenosine/adenosylhomocysteine nucleosidase [Caldalkalibacillus thermarum TA2.A1]	0	0	0	0	0	0	0	0	0	0	0	0	0	0	0	0	0	0	0	0	0	0	11400000	1	4830000	1	0	0	34200000	4	22000000	3	0	0	0	0	0	0	0	0	177000000	13
1350	QZT35527.1	thioredoxin family protein [Caldalkalibacillus thermarum TA2.A1]	0	0	0	0	0	0	0	0	0	0	0	0	0	0	0	0	0	0	0	0	0	0	3280000	1	17200000	2	11300000	1	26000000	3	3950000	1	0	0	0	0	0	0	9030000	1	407000000	14
1351	QZT32804.1	ribulose-phosphate 3-epimerase [Caldalkalibacillus thermarum TA2.A1]	0	0	0	0	0	0	0	0	0	0	0	0	0	0	0	0	0	0	0	0	0	0	5000000	1	0	0	0	0	5620000	1	0	0	0	0	0	0	0	0	0	0	6010000	3
1352	QZT34147.1	M23 family metallopeptidase [Caldalkalibacillus thermarum TA2.A1]	0	0	0	0	0	0	0	0	0	0	0	0	0	0	0	0	0	0	0	0	0	0	3690000	1	0	0	0	0	0	0	3000000	1	0	0	0	0	0	0	0	0	0	0
1353	QZT33724.1	ImmA/IrrE family metallo-endopeptidase [Caldalkalibacillus thermarum TA2.A1]	0	0	0	0	0	0	0	0	0	0	0	0	0	0	0	0	0	0	0	0	0	0	0	1	0	0	0	0	0	0	0	0	0	0	0	0	0	0	0	0	0	0
1354	QZT33493.1	YebC/PmpR family DNA-binding transcriptional regulator [Caldalkalibacillus thermarum TA2.A1]	0	0	0	0	0	0	0	0	0	0	0	0	0	0	0	0	0	0	0	0	0	0	3780000	1	0	0	0	0	0	0	0	0	0	0	0	0	0	0	0	0	14400000	5
1355	QZT32519.1	fumarylacetoacetate hydrolase family protein [Caldalkalibacillus thermarum TA2.A1]	0	0	0	0	0	0	0	0	0	0	0	0	0	0	0	0	0	0	0	0	0	0	633000	1	1310000	1	0	0	0	0	0	0	0	0	0	0	0	0	0	0	107000000	10
1356	QZT35149.1	amidase [Caldalkalibacillus thermarum TA2.A1]	0	0	0	0	0	0	0	0	0	0	0	0	0	0	0	0	0	0	0	0	0	0	898000	1	0	0	0	0	0	0	0	0	0	0	0	0	0	0	0	0	72600000	17
1357	QZT33782.1	LacI family transcriptional regulator [Caldalkalibacillus thermarum TA2.A1]	0	0	0	0	0	0	0	0	0	0	0	0	0	0	0	0	0	0	0	0	0	0	3350000	1	0	0	0	0	1660000	1	0	0	0	0	0	0	0	0	0	0	2240000	4
1358	QZT32684.1	GspE/PulE family protein [Caldalkalibacillus thermarum TA2.A1]	0	0	0	0	0	0	0	0	0	0	0	0	0	0	0	0	0	0	0	0	0	0	3580000	1	0	0	0	0	0	0	0	0	0	0	0	0	0	0	0	0	0	0
1359	QZT33525.1	sensor domain-containing diguanylate cyclase [Caldalkalibacillus thermarum TA2.A1]	0	0	0	0	0	0	0	0	0	0	0	0	0	0	0	0	0	0	0	0	0	0	836000	1	0	0	0	0	0	0	0	0	0	0	0	0	0	0	0	0	0	0
1360	QZT33450.1	cytochrome c oxidase subunit 2A [Caldalkalibacillus thermarum TA2.A1]	0	0	0	0	0	0	0	0	0	0	0	0	0	0	0	0	0	0	0	0	0	0	71400000	1	49400000	1	30700000	1	47100000	1	27000000	1	0	0	57600000	1	490000000	2	0	0	0	0
1361	QZT34280.1	S-methyl-5-thioribose kinase [Caldalkalibacillus thermarum TA2.A1]	0	0	0	0	0	0	0	0	0	0	0	0	0	0	0	0	0	0	0	0	0	0	0	1	0	0	0	0	0	0	0	0	0	0	0	0	0	0	0	0	2740000	4
1362	QZT33125.1	SurA N-terminal domain-containing protein [Caldalkalibacillus thermarum TA2.A1]	0	0	0	0	0	0	0	0	0	0	0	0	0	0	0	0	0	0	0	0	0	0	126000	1	0	0	0	0	0	0	0	0	0	0	0	0	0	0	0	0	0	0
1363	QZT35278.1	branched-chain amino acid ABC transporter permease [Caldalkalibacillus thermarum TA2.A1]	0	0	0	0	0	0	0	0	0	0	0	0	0	0	0	0	0	0	0	0	0	0	10600000	1	0	0	0	0	0	0	0	0	0	0	0	0	0	0	0	0	0	0
1364	QZT35066.1	hypothetical protein HUR95_07540 [Caldalkalibacillus thermarum TA2.A1]	0	0	0	0	0	0	0	0	0	0	0	0	0	0	0	0	0	0	0	0	0	0	361000	1	1360000	1	650000	1	0	0	0	0	0	0	0	0	0	0	0	0	7140000	4
1365	QZT35505.1	TraM recognition domain-containing protein [Caldalkalibacillus thermarum TA2.A1]	0	0	0	0	0	0	0	0	0	0	0	0	0	0	0	0	0	0	0	0	0	0	0	1	0	0	0	0	0	0	0	0	0	0	0	0	0	0	0	0	65700000	1
1366	QZT33237.1	hypothetical protein HUR95_13190 [Caldalkalibacillus thermarum TA2.A1]	0	0	0	0	0	0	0	0	0	0	0	0	0	0	0	0	0	0	0	0	0	0	0	0	7450000	1	8840000	2	59800000	5	0	0	7100000	1	19400000	2	0	0	1490000	1	21000000	7
1367	QZT33395.1	tRNA (N(6)-L-threonylcarbamoyladenosine(37)-C(2))-methylthiotransferase MtaB [Caldalkalibacillus thermarum TA2.A1]	0	0	0	0	0	0	0	0	0	0	0	0	0	0	0	0	0	0	0	0	0	0	0	0	16800000	2	13700000	3	2890000	2	1680000	1	0	0	0	0	0	0	0	0	0	0
1368	QZT34131.1	amidohydrolase [Caldalkalibacillus thermarum TA2.A1]	0	0	0	0	0	0	0	0	0	0	0	0	0	0	0	0	0	0	0	0	0	0	0	0	2580000	1	0	0	0	1	1610000	1	0	0	0	0	0	0	0	0	52900000	11
1369	QZT32981.1	30S ribosome-binding factor RbfA [Caldalkalibacillus thermarum TA2.A1]	0	0	0	0	0	0	0	0	0	0	0	0	0	0	0	0	0	0	0	0	0	0	0	0	13600000	2	0	0	0	0	31600000	1	0	0	0	0	0	0	0	0	249000000	7
1370	QZT34744.1	type I-B CRISPR-associated endonuclease Cas1b [Caldalkalibacillus thermarum TA2.A1]	0	0	0	0	0	0	0	0	0	0	0	0	0	0	0	0	0	0	0	0	0	0	0	0	5580000	1	5220000	1	0	0	4670000	1	0	0	0	0	0	0	0	0	0	0
1371	QZT34255.1	response regulator transcription factor [Caldalkalibacillus thermarum TA2.A1]	0	0	0	0	0	0	0	0	0	0	0	0	0	0	0	0	0	0	0	0	0	0	0	0	1820000	1	1150000	1	1630000	1	3020000	2	0	0	0	0	0	0	0	0	482000000	9
1372	QZT33145.1	rRNA pseudouridine synthase [Caldalkalibacillus thermarum TA2.A1]	0	0	0	0	0	0	0	0	0	0	0	0	0	0	0	0	0	0	0	0	0	0	0	0	2530000	1	1760000	1	0	0	0	0	0	0	0	0	0	0	0	0	3750000	5
1373	QZT35337.1	metal-dependent hydrolase [Caldalkalibacillus thermarum TA2.A1]	0	0	0	0	0	0	0	0	0	0	0	0	0	0	0	0	0	0	0	0	0	0	0	0	20400000	1	30400000	2	24300000	1	20100000	2	4380000	1	0	0	0	0	0	0	2480000000	11
1374	QZT35288.1	RNA-binding transcriptional accessory protein [Caldalkalibacillus thermarum TA2.A1]	0	0	0	0	0	0	0	0	0	0	0	0	0	0	0	0	0	0	0	0	0	0	0	0	655000	1	471000	1	0	0	0	0	0	0	0	0	0	0	0	0	3560000	8
1375	QZT34245.1	carbon-nitrogen hydrolase family protein [Caldalkalibacillus thermarum TA2.A1]	0	0	0	0	0	0	0	0	0	0	0	0	0	0	0	0	0	0	0	0	0	0	0	0	3450000	2	0	0	2650000	1	6930000	2	0	0	0	0	0	0	0	0	111000000	13
1376	QZT34714.1	ribonuclease HI [Caldalkalibacillus thermarum TA2.A1]	0	0	0	0	0	0	0	0	0	0	0	0	0	0	0	0	0	0	0	0	0	0	0	0	9830000	2	0	0	4620000	1	5510000	2	0	0	0	0	0	0	0	0	38900000	6
1377	QZT34101.1	hypothetical protein HUR95_01325 [Caldalkalibacillus thermarum TA2.A1]	0	0	0	0	0	0	0	0	0	0	0	0	0	0	0	0	0	0	0	0	0	0	0	0	4820000	1	0	0	0	0	1620000	1	0	0	0	0	0	0	0	0	583000	1
1378	QZT34405.1	50S ribosomal protein L33 [Caldalkalibacillus thermarum TA2.A1]	0	0	0	0	0	0	0	0	0	0	0	0	0	0	0	0	0	0	0	0	0	0	0	0	68200000	1	66400000	1	13500000	1	73400000	1	0	0	0	0	0	0	0	0	112000000	2
1379	QZT33187.1	GapA-binding peptide SR1P [Caldalkalibacillus thermarum TA2.A1]	0	0	0	0	0	0	0	0	0	0	0	0	0	0	0	0	0	0	0	0	0	0	0	0	32600000	1	0	0	32600000	1	22200000	1	0	0	0	0	0	0	3570000	1	0	0
1380	QZT32871.1	macro domain-containing protein [Caldalkalibacillus thermarum TA2.A1]	0	0	0	0	0	0	0	0	0	0	0	0	0	0	0	0	0	0	0	0	0	0	0	0	815000	1	0	0	1560000	1	0	0	0	0	0	0	0	0	0	0	61500000	10
1381	QZT33179.1	YlaI family protein [Caldalkalibacillus thermarum TA2.A1]	0	0	0	0	0	0	0	0	0	0	0	0	0	0	0	0	0	0	0	0	0	0	0	0	11300000	1	12500000	1	12300000	2	0	0	0	0	0	0	0	0	0	0	23800000	6
1382	QZT34032.1	YigZ family protein [Caldalkalibacillus thermarum TA2.A1]	0	0	0	0	0	0	0	0	0	0	0	0	0	0	0	0	0	0	0	0	0	0	0	0	6230000	1	0	0	0	0	0	0	0	0	0	0	0	0	0	1	47300000	8
1383	QZT33656.1	tyrosine-type recombinase/integrase [Caldalkalibacillus thermarum TA2.A1]	0	0	0	0	0	0	0	0	0	0	0	0	0	0	0	0	0	0	0	0	0	0	0	0	582000	1	0	0	0	1	5540000	1	0	0	0	0	0	0	0	0	0	0
1384	QZT33006.1	flagellar biosynthesis protein FlhF [Caldalkalibacillus thermarum TA2.A1]	0	0	0	0	0	0	0	0	0	0	0	0	0	0	0	0	0	0	0	0	0	0	0	0	0	1	1460000	1	1910000	1	1510000	1	0	0	0	0	0	0	0	0	0	0
1385	QZT32632.1	glycerol-3-phosphate 1-O-acyltransferase PlsY [Caldalkalibacillus thermarum TA2.A1]	0	0	0	0	0	0	0	0	0	0	0	0	0	0	0	0	0	0	0	0	0	0	0	0	907000	1	0	0	0	0	0	0	0	0	0	0	0	0	0	0	0	0
1386	QZT32863.1	low molecular weight phosphotyrosine protein phosphatase [Caldalkalibacillus thermarum TA2.A1]	0	0	0	0	0	0	0	0	0	0	0	0	0	0	0	0	0	0	0	0	0	0	0	0	6780000	1	16200000	1	0	0	0	0	0	0	0	0	0	0	0	0	152000000	5
1387	QZT35286.1	hypothetical protein HUR95_03755 [Caldalkalibacillus thermarum TA2.A1]	0	0	0	0	0	0	0	0	0	0	0	0	0	0	0	0	0	0	0	0	0	0	0	0	3010000	1	0	0	0	0	0	0	0	0	0	0	0	0	0	0	5380000	4
1388	QZT34118.1	aminotransferase class I/II-fold pyridoxal phosphate-dependent enzyme [Caldalkalibacillus thermarum TA2.A1]	0	0	0	0	0	0	0	0	0	0	0	0	0	0	0	0	0	0	0	0	0	0	0	0	2940000	1	0	0	10100000	1	9750000	1	0	0	0	0	0	0	0	0	105000000	14
1389	QZT32714.1	protein-glutamate O-methyltransferase CheR [Caldalkalibacillus thermarum TA2.A1]	0	0	0	0	0	0	0	0	0	0	0	0	0	0	0	0	0	0	0	0	0	0	0	0	7410000	1	0	0	749000	1	5810000	1	0	0	3930000	2	0	0	0	0	719000	3
1390	QZT34710.1	hypothetical protein HUR95_05230 [Caldalkalibacillus thermarum TA2.A1]	0	0	0	0	0	0	0	0	0	0	0	0	0	0	0	0	0	0	0	0	0	0	0	0	3800000	1	0	0	3550000	2	0	0	0	0	0	0	0	0	0	0	0	0
1391	QZT34469.1	phenylacetate--CoA ligase [Caldalkalibacillus thermarum TA2.A1]	0	0	0	0	0	0	0	0	0	0	0	0	0	0	0	0	0	0	0	0	0	0	0	0	387000	1	0	0	0	0	0	0	0	0	0	0	0	0	0	0	0	0
1392	QZT33518.1	prepilin-type N-terminal cleavage/methylation domain-containing protein [Caldalkalibacillus thermarum TA2.A1]	0	0	0	0	0	0	0	0	0	0	0	0	0	0	0	0	0	0	0	0	0	0	0	0	4910000	1	0	0	119000000	3	105000000	3	0	0	164000000	4	0	0	0	0	3450000	2
1393	QZT34187.1	peptide chain release factor 1 [Caldalkalibacillus thermarum TA2.A1]	0	0	0	0	0	0	0	0	0	0	0	0	0	0	0	0	0	0	0	0	0	0	0	0	4780000	1	0	0	6700000	2	0	0	0	0	0	0	0	0	0	0	404000000	25
1394	QZT35366.1	GNAT family N-acetyltransferase [Caldalkalibacillus thermarum TA2.A1]	0	0	0	0	0	0	0	0	0	0	0	0	0	0	0	0	0	0	0	0	0	0	0	0	10300000	1	0	0	3840000	1	3710000	2	0	0	0	0	0	0	0	0	28500000	6
1395	QZT34549.1	homoserine dehydrogenase [Caldalkalibacillus thermarum TA2.A1]	0	0	0	0	0	0	0	0	0	0	0	0	0	0	0	0	0	0	0	0	0	0	0	0	4050000	1	0	0	25300000	2	0	1	0	0	0	0	0	0	0	0	34200000	11
1396	QZT34508.1	IS110 family transposase [Caldalkalibacillus thermarum TA2.A1]	0	0	0	0	0	0	0	0	0	0	0	0	0	0	0	0	0	0	0	0	0	0	0	0	0	1	0	0	0	0	0	0	0	0	0	0	0	0	0	0	0	0
1397	QZT32787.1	DUF84 family protein [Caldalkalibacillus thermarum TA2.A1]	0	0	0	0	0	0	0	0	0	0	0	0	0	0	0	0	0	0	0	0	0	0	0	0	919000	1	0	0	0	0	537000	1	0	0	0	0	0	0	0	0	209000	1
1398	QZT35437.1	D-alanyl-D-alanine carboxypeptidase [Caldalkalibacillus thermarum TA2.A1]	0	0	0	0	0	0	0	0	0	0	0	0	0	0	0	0	0	0	0	0	0	0	0	0	622000	1	0	0	0	0	0	0	0	0	0	0	0	0	0	0	0	0
1399	QZT33789.1	bifunctional 4-hydroxy-2-oxoglutarate aldolase/2-dehydro-3-deoxy-phosphogluconate aldolase [Caldalkalibacillus thermarum TA2.A1]	0	0	0	0	0	0	0	0	0	0	0	0	0	0	0	0	0	0	0	0	0	0	0	0	576000	1	0	0	0	0	0	0	0	0	0	0	0	0	0	0	21900000	5
1400	QZT33169.1	transcriptional repressor [Caldalkalibacillus thermarum TA2.A1]	0	0	0	0	0	0	0	0	0	0	0	0	0	0	0	0	0	0	0	0	0	0	0	0	5180000	1	0	0	6660000	1	0	0	0	0	0	0	0	0	0	0	22500000	6
1401	QZT34517.1	GNAT family N-acetyltransferase [Caldalkalibacillus thermarum TA2.A1]	0	0	0	0	0	0	0	0	0	0	0	0	0	0	0	0	0	0	0	0	0	0	0	0	255000	1	531000	1	6170000	1	0	0	0	0	0	0	0	0	0	0	0	0
1402	QZT33473.1	histidine--tRNA ligase [Caldalkalibacillus thermarum TA2.A1]	0	0	0	0	0	0	0	0	0	0	0	0	0	0	0	0	0	0	0	0	0	0	0	0	3640000	1	0	0	0	0	0	0	0	0	0	0	0	0	0	0	277000000	20
1403	QZT34216.1	HD domain-containing protein [Caldalkalibacillus thermarum TA2.A1]	0	0	0	0	0	0	0	0	0	0	0	0	0	0	0	0	0	0	0	0	0	0	0	0	713000	1	0	0	0	0	825000	1	0	0	0	0	0	0	0	0	8070000	10
1404	QZT35143.1	HAMP domain-containing histidine kinase [Caldalkalibacillus thermarum TA2.A1]	0	0	0	0	0	0	0	0	0	0	0	0	0	0	0	0	0	0	0	0	0	0	0	0	12600000	1	0	0	0	0	0	0	0	0	0	0	0	0	0	0	0	0
1405	QZT35426.1	tyrosine recombinase XerC [Caldalkalibacillus thermarum TA2.A1]	0	0	0	0	0	0	0	0	0	0	0	0	0	0	0	0	0	0	0	0	0	0	0	0	1630000	1	0	0	0	0	0	1	0	0	0	0	0	0	0	0	0	0
1406	QZT33339.1	redoxin domain-containing protein [Caldalkalibacillus thermarum TA2.A1]	0	0	0	0	0	0	0	0	0	0	0	0	0	0	0	0	0	0	0	0	0	0	0	0	0	0	2830000	1	831000	1	2410000	1	0	0	0	0	0	0	0	0	125000000	4
1407	QZT35258.1	BMC domain-containing protein [Caldalkalibacillus thermarum TA2.A1]	0	0	0	0	0	0	0	0	0	0	0	0	0	0	0	0	0	0	0	0	0	0	0	0	0	0	5010000	1	4340000	1	3860000	1	0	0	0	0	0	0	0	0	0	0
1408	QZT32653.1	transcription antitermination factor NusB [Caldalkalibacillus thermarum TA2.A1]	0	0	0	0	0	0	0	0	0	0	0	0	0	0	0	0	0	0	0	0	0	0	0	0	0	0	5220000	1	0	0	0	0	0	0	0	0	0	0	0	0	61700000	10
1409	QZT34213.1	polyamine aminopropyltransferase [Caldalkalibacillus thermarum TA2.A1]	0	0	0	0	0	0	0	0	0	0	0	0	0	0	0	0	0	0	0	0	0	0	0	0	0	0	9310000	2	0	2	4260000	1	0	0	0	0	0	0	0	0	78100000	13
1410	QZT34098.1	5-deoxy-glucuronate isomerase [Caldalkalibacillus thermarum TA2.A1]	0	0	0	0	0	0	0	0	0	0	0	0	0	0	0	0	0	0	0	0	0	0	0	0	0	0	743000	1	12000000	2	0	0	0	0	0	0	0	0	0	0	68500000	6
1411	QZT34595.1	diacylglycerol kinase family lipid kinase [Caldalkalibacillus thermarum TA2.A1]	0	0	0	0	0	0	0	0	0	0	0	0	0	0	0	0	0	0	0	0	0	0	0	0	0	0	2160000	1	0	0	0	0	0	0	0	0	0	0	0	0	0	0
1412	QZT35453.1	YlaN family protein [Caldalkalibacillus thermarum TA2.A1]	0	0	0	0	0	0	0	0	0	0	0	0	0	0	0	0	0	0	0	0	0	0	0	0	0	0	5810000	1	10200000	1	9860000	1	0	0	0	0	0	0	0	0	20500000	5
1413	QZT34375.1	dihydropteroate synthase [Caldalkalibacillus thermarum TA2.A1]	0	0	0	0	0	0	0	0	0	0	0	0	0	0	0	0	0	0	0	0	0	0	0	0	0	0	2570000	1	15100000	4	3310000	3	0	0	42900000	1	0	0	0	0	249000000	17
1414	QZT34433.1	type Z 30S ribosomal protein S14 [Caldalkalibacillus thermarum TA2.A1]	0	0	0	0	0	0	0	0	0	0	0	0	0	0	0	0	0	0	0	0	0	0	0	0	0	0	3490000	1	0	0	0	0	0	0	0	0	0	0	0	0	0	0
1415	QZT34218.1	helix-turn-helix transcriptional regulator [Caldalkalibacillus thermarum TA2.A1]	0	0	0	0	0	0	0	0	0	0	0	0	0	0	0	0	0	0	0	0	0	0	0	0	0	0	0	1	1110000	1	0	0	0	0	0	0	0	0	0	0	0	0
1416	QZT33978.1	phage tail protein [Caldalkalibacillus thermarum TA2.A1]	0	0	0	0	0	0	0	0	0	0	0	0	0	0	0	0	0	0	0	0	0	0	0	0	0	0	759000	1	0	0	0	1	0	0	0	0	0	0	0	0	0	0
1417	QZT34339.1	16S rRNA (adenine(1518)-N(6)/adenine(1519)-N(6))-dimethyltransferase RsmA [Caldalkalibacillus thermarum TA2.A1]	0	0	0	0	0	0	0	0	0	0	0	0	0	0	0	0	0	0	0	0	0	0	0	0	0	0	0	1	0	1	0	0	0	0	0	0	0	0	0	0	1910000	4
1418	QZT34694.1	transposase [Caldalkalibacillus thermarum TA2.A1]	0	0	0	0	0	0	0	0	0	0	0	0	0	0	0	0	0	0	0	0	0	0	0	0	0	0	0	1	8660000	2	2490000	1	0	0	0	0	0	0	8370000	1	0	0
1419	QZT34661.1	23S rRNA (uracil(1939)-C(5))-methyltransferase RlmD [Caldalkalibacillus thermarum TA2.A1]	0	0	0	0	0	0	0	0	0	0	0	0	0	0	0	0	0	0	0	0	0	0	0	0	0	0	500000	1	0	0	0	0	0	0	0	0	0	0	0	0	0	0
1420	QZT32508.1	HAD family hydrolase [Caldalkalibacillus thermarum TA2.A1]	0	0	0	0	0	0	0	0	0	0	0	0	0	0	0	0	0	0	0	0	0	0	0	0	0	0	1470000	1	0	0	966000	1	0	0	0	0	0	0	0	0	23100000	6
1421	QZT35140.1	SHOCT domain-containing protein [Caldalkalibacillus thermarum TA2.A1]	0	0	0	0	0	0	0	0	0	0	0	0	0	0	0	0	0	0	0	0	0	0	0	0	0	0	0	1	0	0	0	0	0	0	0	0	0	0	0	0	0	0
1422	QZT35444.1	acetoin utilization protein AcuC [Caldalkalibacillus thermarum TA2.A1]	0	0	0	0	0	0	0	0	0	0	0	0	0	0	0	0	0	0	0	0	0	0	0	0	0	0	1910000	1	0	0	0	0	0	0	0	0	0	0	0	0	0	0
1423	QZT35489.1	acyl-CoA dehydrogenase family protein [Caldalkalibacillus thermarum TA2.A1]	0	0	0	0	0	0	0	0	0	0	0	0	0	0	0	0	0	0	0	0	0	0	0	0	0	0	201000	1	0	0	0	0	0	0	0	0	0	0	0	0	0	0
1424	QZT33762.1	MetQ/NlpA family ABC transporter substrate-binding protein [Caldalkalibacillus thermarum TA2.A1]	0	0	0	0	0	0	0	0	0	0	0	0	0	0	0	0	0	0	0	0	0	0	0	0	0	0	0	0	122000000	3	40900000	2	166000000	7	189000000	3	0	0	0	0	312000000	5
1425	QZT34066.1	DUF2922 domain-containing protein [Caldalkalibacillus thermarum TA2.A1]	0	0	0	0	0	0	0	0	0	0	0	0	0	0	0	0	0	0	0	0	0	0	0	0	0	0	0	0	10600000	2	0	0	0	0	0	0	0	0	0	0	1450000	2
1426	QZT35235.1	5-dehydro-2-deoxygluconokinase [Caldalkalibacillus thermarum TA2.A1]	0	0	0	0	0	0	0	0	0	0	0	0	0	0	0	0	0	0	0	0	0	0	0	0	0	0	0	0	5420000	4	1850000	2	0	0	0	0	0	0	0	0	91800000	13
1427	QZT32605.1	nitroreductase [Caldalkalibacillus thermarum TA2.A1]	0	0	0	0	0	0	0	0	0	0	0	0	0	0	0	0	0	0	0	0	0	0	0	0	0	0	0	0	16100000	2	14600000	2	0	0	0	0	0	0	0	0	118000000	8
1428	QZT35257.1	phosphate propanoyltransferase [Caldalkalibacillus thermarum TA2.A1]	0	0	0	0	0	0	0	0	0	0	0	0	0	0	0	0	0	0	0	0	0	0	0	0	0	0	0	0	6850000	2	3240000	1	0	0	0	0	0	0	0	0	0	0
1429	QZT33850.1	transposase [Caldalkalibacillus thermarum TA2.A1]	0	0	0	0	0	0	0	0	0	0	0	0	0	0	0	0	0	0	0	0	0	0	0	0	0	0	0	0	8660000	2	2490000	1	0	0	0	0	0	0	8370000	1	0	0
1430	QZT35214.1	copper resistance protein CopC [Caldalkalibacillus thermarum TA2.A1]	0	0	0	0	0	0	0	0	0	0	0	0	0	0	0	0	0	0	0	0	0	0	0	0	0	0	0	0	11800000	2	3650000	1	0	0	0	0	0	0	0	0	14000000	2
1431	QZT33133.1	DUF177 domain-containing protein [Caldalkalibacillus thermarum TA2.A1]	0	0	0	0	0	0	0	0	0	0	0	0	0	0	0	0	0	0	0	0	0	0	0	0	0	0	0	0	3180000	1	2820000	1	0	0	0	0	0	0	0	0	6400000	3
1432	QZT32540.1	alpha/beta hydrolase [Caldalkalibacillus thermarum TA2.A1]	0	0	0	0	0	0	0	0	0	0	0	0	0	0	0	0	0	0	0	0	0	0	0	0	0	0	0	0	9330000	1	7630000	2	0	0	0	0	0	0	2190000	1	74600000	11
1433	QZT33562.1	ABC transporter substrate-binding protein [Caldalkalibacillus thermarum TA2.A1]	0	0	0	0	0	0	0	0	0	0	0	0	0	0	0	0	0	0	0	0	0	0	0	0	0	0	0	0	23300000	1	20100000	1	0	0	0	0	0	0	0	0	0	0
1434	QZT34639.1	NAD-dependent DNA ligase LigA [Caldalkalibacillus thermarum TA2.A1]	0	0	0	0	0	0	0	0	0	0	0	0	0	0	0	0	0	0	0	0	0	0	0	0	0	0	0	0	3620000	1	0	0	0	0	0	0	0	0	0	0	216000000	34
1435	QZT32900.1	FAD-binding protein [Caldalkalibacillus thermarum TA2.A1]	0	0	0	0	0	0	0	0	0	0	0	0	0	0	0	0	0	0	0	0	0	0	0	0	0	0	0	0	4530000	1	0	0	0	0	0	0	0	0	0	0	0	0
1436	QZT35274.1	energy-coupling factor transporter transmembrane protein EcfT [Caldalkalibacillus thermarum TA2.A1]	0	0	0	0	0	0	0	0	0	0	0	0	0	0	0	0	0	0	0	0	0	0	0	0	0	0	0	0	5550000	1	4970000	1	0	0	0	0	0	0	0	0	0	0
1437	QZT35228.1	ABC transporter permease [Caldalkalibacillus thermarum TA2.A1]	0	0	0	0	0	0	0	0	0	0	0	0	0	0	0	0	0	0	0	0	0	0	0	0	0	0	0	0	9600000	1	8680000	1	0	0	0	0	0	0	0	0	1480000	1
1438	QZT32991.1	phosphatidate cytidylyltransferase [Caldalkalibacillus thermarum TA2.A1]	0	0	0	0	0	0	0	0	0	0	0	0	0	0	0	0	0	0	0	0	0	0	0	0	0	0	0	0	2700000	1	0	0	0	0	0	0	0	0	0	0	0	0
1439	QZT34539.1	radical SAM protein [Caldalkalibacillus thermarum TA2.A1]	0	0	0	0	0	0	0	0	0	0	0	0	0	0	0	0	0	0	0	0	0	0	0	0	0	0	0	0	4410000	2	0	0	0	0	0	0	0	0	0	0	0	0
1440	QZT33242.1	DMT family transporter [Caldalkalibacillus thermarum TA2.A1]	0	0	0	0	0	0	0	0	0	0	0	0	0	0	0	0	0	0	0	0	0	0	0	0	0	0	0	0	29700000	1	0	0	0	0	0	0	0	0	0	0	1030000	1
1441	QZT32898.1	response regulator transcription factor [Caldalkalibacillus thermarum TA2.A1]	0	0	0	0	0	0	0	0	0	0	0	0	0	0	0	0	0	0	0	0	0	0	0	0	0	0	0	0	1530000	1	0	0	0	0	0	0	0	0	0	0	0	0
1442	QZT34632.1	flagellin [Caldalkalibacillus thermarum TA2.A1]	0	0	0	0	0	0	0	0	0	0	0	0	0	0	0	0	0	0	0	0	0	0	0	0	0	0	0	0	9240000	1	0	0	0	0	4650000	1	0	0	0	0	486000000	18
1443	QZT35521.1	DUF1028 domain-containing protein [Caldalkalibacillus thermarum TA2.A1]	0	0	0	0	0	0	0	0	0	0	0	0	0	0	0	0	0	0	0	0	0	0	0	0	0	0	0	0	4720000	1	3910000	1	0	0	0	0	0	0	0	0	65200000	10
1444	QZT32493.1	hypothetical protein HUR95_08670 [Caldalkalibacillus thermarum TA2.A1]	0	0	0	0	0	0	0	0	0	0	0	0	0	0	0	0	0	0	0	0	0	0	0	0	0	0	0	0	12800000	1	0	0	0	0	0	0	0	0	0	0	969000	1
1445	QZT32578.1	thiaminase II [Caldalkalibacillus thermarum TA2.A1]	0	0	0	0	0	0	0	0	0	0	0	0	0	0	0	0	0	0	0	0	0	0	0	0	0	0	0	0	8670000	1	0	0	0	0	0	0	0	0	0	0	1220000000	14
1446	QZT32528.1	cysteine synthase A [Caldalkalibacillus thermarum TA2.A1]	0	0	0	0	0	0	0	0	0	0	0	0	0	0	0	0	0	0	0	0	0	0	0	0	0	0	0	0	0	1	0	0	0	0	0	0	0	0	0	0	1240000000	22
1447	QZT34361.1	RNA-binding protein S1 [Caldalkalibacillus thermarum TA2.A1]	0	0	0	0	0	0	0	0	0	0	0	0	0	0	0	0	0	0	0	0	0	0	0	0	0	0	0	0	4550000	1	0	0	0	0	0	0	0	0	0	0	0	0
1448	QZT34496.1	HNH endonuclease [Caldalkalibacillus thermarum TA2.A1]	0	0	0	0	0	0	0	0	0	0	0	0	0	0	0	0	0	0	0	0	0	0	0	0	0	0	0	0	7380000	1	0	0	0	0	0	0	0	0	0	0	0	0
1449	QZT34944.1	membrane protein FxsA [Caldalkalibacillus thermarum TA2.A1]	0	0	0	0	0	0	0	0	0	0	0	0	0	0	0	0	0	0	0	0	0	0	0	0	0	0	0	0	3430000	1	3790000	1	0	0	0	0	0	0	0	0	0	0
1450	QZT34468.1	ABC transporter substrate-binding protein [Caldalkalibacillus thermarum TA2.A1]	0	0	0	0	0	0	0	0	0	0	0	0	0	0	0	0	0	0	0	0	0	0	0	0	0	0	0	0	2750000	1	0	0	0	0	0	0	0	0	0	0	0	0
1451	QZT34474.1	enoyl-CoA hydratase/isomerase family protein [Caldalkalibacillus thermarum TA2.A1]	0	0	0	0	0	0	0	0	0	0	0	0	0	0	0	0	0	0	0	0	0	0	0	0	0	0	0	0	2410000	1	0	0	0	0	0	0	0	0	0	0	0	0
1452	QZT34879.1	NAD(P)/FAD-dependent oxidoreductase [Caldalkalibacillus thermarum TA2.A1]	0	0	0	0	0	0	0	0	0	0	0	0	0	0	0	0	0	0	0	0	0	0	0	0	0	0	0	0	399000	1	1240000	1	0	0	0	0	0	0	0	0	302000	2
1453	QZT32947.1	cytochrome c oxidase subunit 3 [Caldalkalibacillus thermarum TA2.A1]	0	0	0	0	0	0	0	0	0	0	0	0	0	0	0	0	0	0	0	0	0	0	0	0	0	0	0	0	55500000	1	0	0	0	0	0	0	0	0	0	0	47400000	2
1454	QZT33126.1	acyl-CoA carboxylase subunit beta [Caldalkalibacillus thermarum TA2.A1]	0	0	0	0	0	0	0	0	0	0	0	0	0	0	0	0	0	0	0	0	0	0	0	0	0	0	0	0	217000	1	2610000	1	0	0	2470000	1	0	0	0	0	69200000	16
1455	QZT35006.1	YjiH family protein [Caldalkalibacillus thermarum TA2.A1]	0	0	0	0	0	0	0	0	0	0	0	0	0	0	0	0	0	0	0	0	0	0	0	0	0	0	0	0	6100000	1	0	0	0	0	0	0	0	0	0	0	7900000	4
1456	QZT33765.1	hypothetical protein HUR95_16360 [Caldalkalibacillus thermarum TA2.A1]	0	0	0	0	0	0	0	0	0	0	0	0	0	0	0	0	0	0	0	0	0	0	0	0	0	0	0	0	3470000	1	0	0	0	0	0	0	0	0	0	0	1770000	1
1457	QZT34397.1	2-C-methyl-D-erythritol 2 4-cyclodiphosphate synthase [Caldalkalibacillus thermarum TA2.A1]	0	0	0	0	0	0	0	0	0	0	0	0	0	0	0	0	0	0	0	0	0	0	0	0	0	0	0	0	1610000	1	0	0	0	0	0	0	0	0	0	0	267000000	9
1458	QZT32681.1	tryptophan--tRNA ligase [Caldalkalibacillus thermarum TA2.A1]	0	0	0	0	0	0	0	0	0	0	0	0	0	0	0	0	0	0	0	0	0	0	0	0	0	0	0	0	4560000	1	0	0	0	0	15700000	1	0	0	0	0	283000000	20
1459	QZT34691.1	DUF402 domain-containing protein [Caldalkalibacillus thermarum TA2.A1]	0	0	0	0	0	0	0	0	0	0	0	0	0	0	0	0	0	0	0	0	0	0	0	0	0	0	0	0	2350000	1	0	0	0	0	0	0	0	0	0	0	24100000	6
1460	QZT35497.1	thermonuclease family protein [Caldalkalibacillus thermarum TA2.A1]	0	0	0	0	0	0	0	0	0	0	0	0	0	0	0	0	0	0	0	0	0	0	0	0	0	0	0	0	0	1	0	1	0	0	0	0	0	0	0	0	0	0
1461	QZT35518.1	4Fe-4S dicluster domain-containing protein [Caldalkalibacillus thermarum TA2.A1]	0	0	0	0	0	0	0	0	0	0	0	0	0	0	0	0	0	0	0	0	0	0	0	0	0	0	0	0	6460000	1	6100000	1	0	0	0	0	0	0	0	0	0	0
1462	QZT35511.1	ABC transporter permease [Caldalkalibacillus thermarum TA2.A1]	0	0	0	0	0	0	0	0	0	0	0	0	0	0	0	0	0	0	0	0	0	0	0	0	0	0	0	0	12700000	1	0	0	4080000	1	0	0	0	0	0	0	25300000	2
1463	QZT34766.1	hypothetical protein HUR95_05690 [Caldalkalibacillus thermarum TA2.A1]	0	0	0	0	0	0	0	0	0	0	0	0	0	0	0	0	0	0	0	0	0	0	0	0	0	0	0	0	671000	1	0	0	0	0	0	0	0	0	0	0	0	0
1464	QZT33459.1	endolytic transglycosylase MltG [Caldalkalibacillus thermarum TA2.A1]	0	0	0	0	0	0	0	0	0	0	0	0	0	0	0	0	0	0	0	0	0	0	0	0	0	0	0	0	1140000	1	1060000	1	0	0	0	0	0	0	0	0	9640000	2
1465	QZT35473.1	dCMP deaminase family protein [Caldalkalibacillus thermarum TA2.A1]	0	0	0	0	0	0	0	0	0	0	0	0	0	0	0	0	0	0	0	0	0	0	0	0	0	0	0	0	4020000	1	0	0	0	0	0	0	0	0	2930000	1	13600000	2
1466	QZT33330.1	phosphate ABC transporter ATP-binding protein PstB [Caldalkalibacillus thermarum TA2.A1]	0	0	0	0	0	0	0	0	0	0	0	0	0	0	0	0	0	0	0	0	0	0	0	0	0	0	0	0	0	1	0	0	0	0	0	0	0	0	0	0	0	0
1467	QZT33945.1	hypothetical protein HUR95_00440 [Caldalkalibacillus thermarum TA2.A1]	0	0	0	0	0	0	0	0	0	0	0	0	0	0	0	0	0	0	0	0	0	0	0	0	0	0	0	0	6950000	1	6140000	1	0	0	0	0	0	0	0	0	11900000	2
1468	QZT35020.1	ubiquinol-cytochrome c reductase iron-sulfur subunit [Caldalkalibacillus thermarum TA2.A1]	0	0	0	0	0	0	0	0	0	0	0	0	0	0	0	0	0	0	0	0	0	0	0	0	0	0	0	0	4150000	1	0	0	0	0	0	0	0	0	0	0	0	0
1469	QZT34279.1	transposase [Caldalkalibacillus thermarum TA2.A1]	0	0	0	0	0	0	0	0	0	0	0	0	0	0	0	0	0	0	0	0	0	0	0	0	0	0	0	0	22700000	1	0	0	0	0	0	0	0	0	0	0	0	0
1470	QZT32541.1	transposase [Caldalkalibacillus thermarum TA2.A1]	0	0	0	0	0	0	0	0	0	0	0	0	0	0	0	0	0	0	0	0	0	0	0	0	0	0	0	0	22700000	1	0	0	0	0	23800000	1	0	0	0	0	0	0
1471	QZT33043.1	transposase [Caldalkalibacillus thermarum TA2.A1]	0	0	0	0	0	0	0	0	0	0	0	0	0	0	0	0	0	0	0	0	0	0	0	0	0	0	0	0	22700000	1	0	0	0	0	23800000	1	0	0	0	0	0	0
1472	QZT34630.1	transposase [Caldalkalibacillus thermarum TA2.A1]	0	0	0	0	0	0	0	0	0	0	0	0	0	0	0	0	0	0	0	0	0	0	0	0	0	0	0	0	22700000	1	0	0	0	0	23800000	1	0	0	0	0	0	0
1473	QZT35440.1	NUDIX hydrolase [Caldalkalibacillus thermarum TA2.A1]	0	0	0	0	0	0	0	0	0	0	0	0	0	0	0	0	0	0	0	0	0	0	0	0	0	0	0	0	112000	1	6510000	1	0	0	0	0	0	0	0	0	7570000	4
1474	QZT34412.1	class I SAM-dependent methyltransferase [Caldalkalibacillus thermarum TA2.A1]	0	0	0	0	0	0	0	0	0	0	0	0	0	0	0	0	0	0	0	0	0	0	0	0	0	0	0	0	1650000	1	0	0	0	0	0	0	0	0	0	0	1010000	1
1475	QZT35244.1	ATP-binding cassette domain-containing protein [Caldalkalibacillus thermarum TA2.A1]	0	0	0	0	0	0	0	0	0	0	0	0	0	0	0	0	0	0	0	0	0	0	0	0	0	0	0	0	0	0	0	1	0	0	0	0	0	0	0	0	0	0
1476	QZT35335.1	copper chaperone CopZ [Caldalkalibacillus thermarum TA2.A1]	0	0	0	0	0	0	0	0	0	0	0	0	0	0	0	0	0	0	0	0	0	0	0	0	0	0	0	0	0	0	0	1	0	0	11500000	1	0	0	0	0	146000000	5
1477	QZT32559.1	hypothetical protein HUR95_09080 [Caldalkalibacillus thermarum TA2.A1]	0	0	0	0	0	0	0	0	0	0	0	0	0	0	0	0	0	0	0	0	0	0	0	0	0	0	0	0	0	0	25600000	1	0	0	0	0	0	0	0	0	0	0
1478	QZT32616.1	genetic competence negative regulator [Caldalkalibacillus thermarum TA2.A1]	0	0	0	0	0	0	0	0	0	0	0	0	0	0	0	0	0	0	0	0	0	0	0	0	0	0	0	0	0	0	175000	1	0	0	0	0	0	0	0	0	0	0
1479	QZT32691.1	threonine ammonia-lyase [Caldalkalibacillus thermarum TA2.A1]	0	0	0	0	0	0	0	0	0	0	0	0	0	0	0	0	0	0	0	0	0	0	0	0	0	0	0	0	0	0	2270000	1	0	0	0	0	0	0	0	0	972000	2
1480	QZT32796.1	DNA-directed RNA polymerase subunit omega [Caldalkalibacillus thermarum TA2.A1]	0	0	0	0	0	0	0	0	0	0	0	0	0	0	0	0	0	0	0	0	0	0	0	0	0	0	0	0	0	0	1330000	1	0	0	0	0	0	0	0	0	72600000	4
1481	QZT33490.1	Holliday junction branch migration protein RuvA [Caldalkalibacillus thermarum TA2.A1]	0	0	0	0	0	0	0	0	0	0	0	0	0	0	0	0	0	0	0	0	0	0	0	0	0	0	0	0	0	0	2120000	1	0	0	0	0	0	0	0	0	31200000	7
1482	QZT34189.1	ISLre2 family transposase [Caldalkalibacillus thermarum TA2.A1]	0	0	0	0	0	0	0	0	0	0	0	0	0	0	0	0	0	0	0	0	0	0	0	0	0	0	0	0	0	0	13300000	1	0	0	0	0	0	0	0	0	0	0
1483	QZT35268.1	anthranilate synthase component I family protein [Caldalkalibacillus thermarum TA2.A1]	0	0	0	0	0	0	0	0	0	0	0	0	0	0	0	0	0	0	0	0	0	0	0	0	0	0	0	0	0	0	504000	1	0	0	0	0	0	0	0	0	21600000	14
1484	QZT34275.1	aldehyde dehydrogenase EutE [Caldalkalibacillus thermarum TA2.A1]	0	0	0	0	0	0	0	0	0	0	0	0	0	0	0	0	0	0	0	0	0	0	0	0	0	0	0	0	0	0	713000	1	0	0	0	0	0	0	0	0	4410000	9
1485	QZT34251.1	MBL fold metallo-hydrolase [Caldalkalibacillus thermarum TA2.A1]	0	0	0	0	0	0	0	0	0	0	0	0	0	0	0	0	0	0	0	0	0	0	0	0	0	0	0	0	0	0	403000	1	0	0	0	0	0	0	0	0	0	0
1486	QZT33138.1	16S rRNA (guanine(966)-N(2))-methyltransferase RsmD [Caldalkalibacillus thermarum TA2.A1]	0	0	0	0	0	0	0	0	0	0	0	0	0	0	0	0	0	0	0	0	0	0	0	0	0	0	0	0	0	0	2180000	1	0	0	0	0	0	0	0	0	4760000	1
1487	QZT32820.1	putative DNA-binding protein [Caldalkalibacillus thermarum TA2.A1]	0	0	0	0	0	0	0	0	0	0	0	0	0	0	0	0	0	0	0	0	0	0	0	0	0	0	0	0	0	0	0	1	0	0	0	0	0	0	0	0	0	0
1488	QZT32990.1	1-deoxy-D-xylulose-5-phosphate reductoisomerase [Caldalkalibacillus thermarum TA2.A1]	0	0	0	0	0	0	0	0	0	0	0	0	0	0	0	0	0	0	0	0	0	0	0	0	0	0	0	0	0	0	2600000	1	0	0	0	0	0	0	0	0	17700000	6
1489	QZT34777.1	C40 family peptidase [Caldalkalibacillus thermarum TA2.A1]	0	0	0	0	0	0	0	0	0	0	0	0	0	0	0	0	0	0	0	0	0	0	0	0	0	0	0	0	0	0	0	1	0	0	0	0	0	0	0	0	0	0
1490	QZT33898.1	ATP phosphoribosyltransferase regulatory subunit [Caldalkalibacillus thermarum TA2.A1]	0	0	0	0	0	0	0	0	0	0	0	0	0	0	0	0	0	0	0	0	0	0	0	0	0	0	0	0	0	0	12100000	1	0	0	0	0	0	0	0	0	11000000	5
1491	QZT33277.1	helix-turn-helix transcriptional regulator [Caldalkalibacillus thermarum TA2.A1]	0	0	0	0	0	0	0	0	0	0	0	0	0	0	0	0	0	0	0	0	0	0	0	0	0	0	0	0	0	0	107000	1	0	0	0	0	0	0	0	0	0	0
1492	QZT35113.1	IS256 family transposase [Caldalkalibacillus thermarum TA2.A1]	0	0	0	0	0	0	0	0	0	0	0	0	0	0	0	0	0	0	0	0	0	0	0	0	0	0	0	0	0	0	0	1	0	0	0	0	0	0	0	0	0	0
1493	QZT32591.1	IS256 family transposase [Caldalkalibacillus thermarum TA2.A1]	0	0	0	0	0	0	0	0	0	0	0	0	0	0	0	0	0	0	0	0	0	0	0	0	0	0	0	0	0	0	0	1	0	0	0	0	0	0	0	0	0	0
1494	QZT32945.1	cytochrome c oxidase assembly protein [Caldalkalibacillus thermarum TA2.A1]	0	0	0	0	0	0	0	0	0	0	0	0	0	0	0	0	0	0	0	0	0	0	0	0	0	0	0	0	0	0	0	1	0	0	0	0	0	0	0	0	0	0
1495	QZT34681.1	glutamate synthase large subunit [Caldalkalibacillus thermarum TA2.A1]	0	0	0	0	0	0	0	0	0	0	0	0	0	0	0	0	0	0	0	0	0	0	0	0	0	0	0	0	0	0	0	0	0	0	0	0	0	0	0	0	1220000000	81
1496	QZT34370.1	cysteine synthase A [Caldalkalibacillus thermarum TA2.A1]	0	0	0	0	0	0	0	0	0	0	0	0	0	0	0	0	0	0	0	0	0	0	0	0	0	0	0	0	0	0	0	0	0	0	0	0	0	0	0	0	1350000000	19
1497	QZT34874.1	aldehyde dehydrogenase family protein [Caldalkalibacillus thermarum TA2.A1]	0	0	0	0	0	0	0	0	0	0	0	0	0	0	0	0	0	0	0	0	0	0	0	0	0	0	0	0	0	0	0	0	0	0	0	0	0	0	0	0	132000000	24
1498	QZT33922.1	sulfate adenylyltransferase [Caldalkalibacillus thermarum TA2.A1]	0	0	0	0	0	0	0	0	0	0	0	0	0	0	0	0	0	0	0	0	0	0	0	0	0	0	0	0	0	0	0	0	0	0	0	0	0	0	0	0	270000000	23
1499	QZT32935.1	RNA chaperone Hfq [Caldalkalibacillus thermarum TA2.A1]	0	0	0	0	0	0	0	0	0	0	0	0	0	0	0	0	0	0	0	0	0	0	0	0	0	0	0	0	0	0	0	0	0	0	0	0	0	0	0	0	1320000000	11
1500	QZT32600.1	alanine--glyoxylate aminotransferase family protein [Caldalkalibacillus thermarum TA2.A1]	0	0	0	0	0	0	0	0	0	0	0	0	0	0	0	0	0	0	0	0	0	0	0	0	0	0	0	0	0	0	0	0	0	0	0	0	0	0	0	0	379000000	19
1501	QZT34719.1	N-acetyl-gamma-glutamyl-phosphate reductase [Caldalkalibacillus thermarum TA2.A1]	0	0	0	0	0	0	0	0	0	0	0	0	0	0	0	0	0	0	0	0	0	0	0	0	0	0	0	0	0	0	0	0	0	0	0	0	0	0	0	0	245000000	19
1502	QZT34641.1	ABC transporter ATP-binding protein [Caldalkalibacillus thermarum TA2.A1]	0	0	0	0	0	0	0	0	0	0	0	0	0	0	0	0	0	0	0	0	0	0	0	0	0	0	0	0	0	0	0	0	0	0	0	0	0	0	0	0	264000000	16
1503	QZT34875.1	iron-containing alcohol dehydrogenase [Caldalkalibacillus thermarum TA2.A1]	0	0	0	0	0	0	0	0	0	0	0	0	0	0	0	0	0	0	0	0	0	0	0	0	0	0	0	0	0	0	0	0	0	0	0	0	0	0	0	0	210000000	15
1504	QZT34369.1	Hsp33 family molecular chaperone HslO [Caldalkalibacillus thermarum TA2.A1]	0	0	0	0	0	0	0	0	0	0	0	0	0	0	0	0	0	0	0	0	0	0	0	0	0	0	0	0	0	0	0	0	0	0	0	0	0	0	0	0	94100000	15
1505	QZT32866.1	phosphoenolpyruvate--protein phosphotransferase [Caldalkalibacillus thermarum TA2.A1]	0	0	0	0	0	0	0	0	0	0	0	0	0	0	0	0	0	0	0	0	0	0	0	0	0	0	0	0	0	0	0	0	0	0	0	0	0	0	0	0	86100000	21
1506	QZT33571.1	electron transfer flavoprotein subunit alpha/FixB family protein [Caldalkalibacillus thermarum TA2.A1]	0	0	0	0	0	0	0	0	0	0	0	0	0	0	0	0	0	0	0	0	0	0	0	0	0	0	0	0	0	0	0	0	0	0	0	0	0	0	0	0	1810000	2
1507	QZT34548.1	threonine synthase [Caldalkalibacillus thermarum TA2.A1]	0	0	0	0	0	0	0	0	0	0	0	0	0	0	0	0	0	0	0	0	0	0	0	0	0	0	0	0	0	0	0	0	0	0	0	0	0	0	0	0	75100000	12
1508	QZT35003.1	gamma carbonic anhydrase family protein [Caldalkalibacillus thermarum TA2.A1]	0	0	0	0	0	0	0	0	0	0	0	0	0	0	0	0	0	0	0	0	0	0	0	0	0	0	0	0	0	0	0	0	0	0	0	0	0	0	0	0	169000000	11
1509	QZT33933.1	peptide chain release factor 2 [Caldalkalibacillus thermarum TA2.A1]	0	0	0	0	0	0	0	0	0	0	0	0	0	0	0	0	0	0	0	0	0	0	0	0	0	0	0	0	0	0	0	0	0	0	0	0	0	0	0	0	96100000	12
1510	QZT32577.1	N-acetyldiaminopimelate deacetylase [Caldalkalibacillus thermarum TA2.A1]	0	0	0	0	0	0	0	0	0	0	0	0	0	0	0	0	0	0	0	0	0	0	0	0	0	0	0	0	0	0	0	0	0	0	0	0	0	0	0	0	104000000	12
1511	QZT34726.1	argininosuccinate lyase [Caldalkalibacillus thermarum TA2.A1]	0	0	0	0	0	0	0	0	0	0	0	0	0	0	0	0	0	0	0	0	0	0	0	0	0	0	0	0	0	0	0	0	0	0	0	0	0	0	0	0	48600000	11
1512	QZT34078.1	glycoside hydrolase family 32 protein [Caldalkalibacillus thermarum TA2.A1]	0	0	0	0	0	0	0	0	0	0	0	0	0	0	0	0	0	0	0	0	0	0	0	0	0	0	0	0	0	0	0	0	0	0	0	0	0	0	0	0	39000000	12
1513	QZT34212.1	agmatinase [Caldalkalibacillus thermarum TA2.A1]	0	0	0	0	0	0	0	0	0	0	0	0	0	0	0	0	0	0	0	0	0	0	0	0	0	0	0	0	0	0	0	0	0	0	0	0	0	0	0	0	85200000	11
1514	QZT33876.1	formyltetrahydrofolate deformylase [Caldalkalibacillus thermarum TA2.A1]	0	0	0	0	0	0	0	0	0	0	0	0	0	0	0	0	0	0	0	0	0	0	0	0	0	0	0	0	0	0	0	0	0	0	0	0	0	0	0	0	39800000	9
1515	QZT34183.1	low molecular weight protein arginine phosphatase [Caldalkalibacillus thermarum TA2.A1]	0	0	0	0	0	0	0	0	0	0	0	0	0	0	0	0	0	0	0	0	0	0	0	0	0	0	0	0	0	0	0	0	0	0	0	0	0	0	0	0	230000000	9
1516	QZT32491.1	D-aminoacylase [Caldalkalibacillus thermarum TA2.A1]	0	0	0	0	0	0	0	0	0	0	0	0	0	0	0	0	0	0	0	0	0	0	0	0	0	0	0	0	0	0	0	0	0	0	0	0	0	0	0	0	53400000	14
1517	QZT35305.1	acetylornithine transaminase [Caldalkalibacillus thermarum TA2.A1]	0	0	0	0	0	0	0	0	0	0	0	0	0	0	0	0	0	0	0	0	0	0	0	0	0	0	0	0	0	0	0	0	0	0	0	0	0	0	0	0	65800000	10
1518	QZT33857.1	prephenate dehydratase [Caldalkalibacillus thermarum TA2.A1]	0	0	0	0	0	0	0	0	0	0	0	0	0	0	0	0	0	0	0	0	0	0	0	0	0	0	0	0	0	0	0	0	0	0	0	0	0	0	0	0	53000000	8
1519	QZT32510.1	citramalate synthase [Caldalkalibacillus thermarum TA2.A1]	0	0	0	0	0	0	0	0	0	0	0	0	0	0	0	0	0	0	0	0	0	0	0	0	0	0	0	0	0	0	0	0	0	0	0	0	0	0	0	0	89200000	17
1520	QZT32799.1	peptide deformylase [Caldalkalibacillus thermarum TA2.A1]	0	0	0	0	0	0	0	0	0	0	0	0	0	0	0	0	0	0	0	0	0	0	0	0	0	0	0	0	0	0	0	0	0	0	0	0	0	0	0	0	103000000	9
1521	QZT32740.1	3-methyl-2-oxobutanoate hydroxymethyltransferase [Caldalkalibacillus thermarum TA2.A1]	0	0	0	0	0	0	0	0	0	0	0	0	0	0	0	0	0	0	0	0	0	0	0	0	0	0	0	0	0	0	0	0	0	0	0	0	0	0	0	0	41600000	8
1522	QZT34378.1	transcription elongation factor GreA [Caldalkalibacillus thermarum TA2.A1]	0	0	0	0	0	0	0	0	0	0	0	0	0	0	0	0	0	0	0	0	0	0	0	0	0	0	0	0	0	0	0	0	0	0	0	0	0	0	0	0	44300000	6
1523	QZT34510.1	arsenate reductase (thioredoxin) [Caldalkalibacillus thermarum TA2.A1]	0	0	0	0	0	0	0	0	0	0	0	0	0	0	0	0	0	0	0	0	0	0	0	0	0	0	0	0	0	0	0	0	0	0	0	0	0	0	0	0	89200000	10
1524	QZT33817.1	alpha-glucosidase [Caldalkalibacillus thermarum TA2.A1]	0	0	0	0	0	0	0	0	0	0	0	0	0	0	0	0	0	0	0	0	0	0	0	0	0	0	0	0	0	0	0	0	0	0	0	0	0	0	0	0	70800000	15
1525	QZT33930.1	hypothetical protein HUR95_00335 [Caldalkalibacillus thermarum TA2.A1]	0	0	0	0	0	0	0	0	0	0	0	0	0	0	0	0	0	0	0	0	0	0	0	0	0	0	0	0	0	0	0	0	0	0	0	0	0	0	0	0	84000000	3
1526	QZT32837.1	pyrroline-5-carboxylate reductase [Caldalkalibacillus thermarum TA2.A1]	0	0	0	0	0	0	0	0	0	0	0	0	0	0	0	0	0	0	0	0	0	0	0	0	0	0	0	0	0	0	0	0	0	0	0	0	0	0	0	0	32800000	7
1527	QZT33295.1	ROK family glucokinase [Caldalkalibacillus thermarum TA2.A1]	0	0	0	0	0	0	0	0	0	0	0	0	0	0	0	0	0	0	0	0	0	0	0	0	0	0	0	0	0	0	0	0	0	0	0	0	0	0	0	0	16100000	8
1528	QZT35126.1	GNAT family N-acetyltransferase [Caldalkalibacillus thermarum TA2.A1]	0	0	0	0	0	0	0	0	0	0	0	0	0	0	0	0	0	0	0	0	0	0	0	0	0	0	0	0	0	0	0	0	0	0	0	0	0	0	0	0	37900000	8
1529	QZT33353.1	glucose-6-phosphate dehydrogenase [Caldalkalibacillus thermarum TA2.A1]	0	0	0	0	0	0	0	0	0	0	0	0	0	0	0	0	0	0	0	0	0	0	0	0	0	0	0	0	0	0	0	0	0	0	0	0	0	0	0	0	8090000	15
1530	QZT35306.1	ornithine carbamoyltransferase [Caldalkalibacillus thermarum TA2.A1]	0	0	0	0	0	0	0	0	0	0	0	0	0	0	0	0	0	0	0	0	0	0	0	0	0	0	0	0	0	0	0	0	0	0	0	0	0	0	0	0	37700000	12
1531	QZT32793.1	YicC family protein [Caldalkalibacillus thermarum TA2.A1]	0	0	0	0	0	0	0	0	0	0	0	0	0	0	0	0	0	0	0	0	0	0	0	0	0	0	0	0	0	0	0	0	0	0	0	0	0	0	0	0	45700000	9
1532	QZT35463.1	arsenate reductase (thioredoxin) [Caldalkalibacillus thermarum TA2.A1]	0	0	0	0	0	0	0	0	0	0	0	0	0	0	0	0	0	0	0	0	0	0	0	0	0	0	0	0	0	0	0	0	0	0	0	0	0	0	0	0	25900000	7
1533	QZT35374.1	amylo-alpha-1 6-glucosidase [Caldalkalibacillus thermarum TA2.A1]	0	0	0	0	0	0	0	0	0	0	0	0	0	0	0	0	0	0	0	0	0	0	0	0	0	0	0	0	0	0	0	0	0	0	0	0	0	0	0	0	13100000	11
1534	QZT32708.1	trp RNA-binding attenuation protein MtrB [Caldalkalibacillus thermarum TA2.A1]	0	0	0	0	0	0	0	0	0	0	0	0	0	0	0	0	0	0	0	0	0	0	0	0	0	0	0	0	0	0	0	0	0	0	0	0	0	0	0	0	318000000	5
1535	QZT33727.1	alanine racemase [Caldalkalibacillus thermarum TA2.A1]	0	0	0	0	0	0	0	0	0	0	0	0	0	0	0	0	0	0	0	0	0	0	0	0	0	0	0	0	0	0	0	0	0	0	0	0	0	0	0	0	28500000	10
1536	QZT34384.1	carboxylating nicotinate-nucleotide diphosphorylase [Caldalkalibacillus thermarum TA2.A1]	0	0	0	0	0	0	0	0	0	0	0	0	0	0	0	0	0	0	0	0	0	0	0	0	0	0	0	0	0	0	0	0	0	0	0	0	0	0	0	0	53200000	10
1537	QZT34642.1	ABC transporter permease [Caldalkalibacillus thermarum TA2.A1]	0	0	0	0	0	0	0	0	0	0	0	0	0	0	0	0	0	0	0	0	0	0	0	0	0	0	0	0	0	0	0	0	0	0	0	0	0	0	0	0	76600000	5
1538	QZT33348.1	acetate--CoA ligase [Caldalkalibacillus thermarum TA2.A1]	0	0	0	0	0	0	0	0	0	0	0	0	0	0	0	0	0	0	0	0	0	0	0	0	0	0	0	0	0	0	0	0	0	0	0	0	0	0	0	0	4570000	8
1539	QZT33797.1	histidinol-phosphatase HisJ family protein [Caldalkalibacillus thermarum TA2.A1]	0	0	0	0	0	0	0	0	0	0	0	0	0	0	0	0	0	0	0	0	0	0	0	0	0	0	0	0	0	0	0	0	0	0	0	0	0	0	0	0	24100000	9
1540	QZT33916.1	SDR family oxidoreductase [Caldalkalibacillus thermarum TA2.A1]	0	0	0	0	0	0	0	0	0	0	0	0	0	0	0	0	0	0	0	0	0	0	0	0	0	0	0	0	0	0	0	0	0	0	0	0	0	0	0	0	31000000	8
1541	QZT34113.1	aspartate aminotransferase family protein [Caldalkalibacillus thermarum TA2.A1]	0	0	0	0	0	0	0	0	0	0	0	0	0	0	0	0	0	0	0	0	0	0	0	0	0	0	0	0	0	0	0	0	0	0	0	0	0	0	0	0	18200000	10
1542	QZT32656.1	exodeoxyribonuclease VII large subunit [Caldalkalibacillus thermarum TA2.A1]	0	0	0	0	0	0	0	0	0	0	0	0	0	0	0	0	0	0	0	0	0	0	0	0	0	0	0	0	0	0	0	0	0	0	0	0	0	0	0	0	4470000	9
1543	QZT32905.1	DsrE/DsrF/DrsH-like family protein [Caldalkalibacillus thermarum TA2.A1]	0	0	0	0	0	0	0	0	0	0	0	0	0	0	0	0	0	0	0	0	0	0	0	0	0	0	0	0	0	0	0	0	0	0	0	0	0	0	0	0	97200000	6
1544	QZT34553.1	alanine racemase [Caldalkalibacillus thermarum TA2.A1]	0	0	0	0	0	0	0	0	0	0	0	0	0	0	0	0	0	0	0	0	0	0	0	0	0	0	0	0	0	0	0	0	0	0	0	0	0	0	0	0	28600000	9
1545	QZT34225.1	glucosamine-6-phosphate deaminase [Caldalkalibacillus thermarum TA2.A1]	0	0	0	0	0	0	0	0	0	0	0	0	0	0	0	0	0	0	0	0	0	0	0	0	0	0	0	0	0	0	0	0	0	0	0	0	0	0	0	0	26600000	7
1546	QZT35451.1	hydroxyethylthiazole kinase [Caldalkalibacillus thermarum TA2.A1]	0	0	0	0	0	0	0	0	0	0	0	0	0	0	0	0	0	0	0	0	0	0	0	0	0	0	0	0	0	0	0	0	0	0	0	0	0	0	0	0	41800000	7
1547	QZT34186.1	peptide chain release factor N(5)-glutamine methyltransferase [Caldalkalibacillus thermarum TA2.A1]	0	0	0	0	0	0	0	0	0	0	0	0	0	0	0	0	0	0	0	0	0	0	0	0	0	0	0	0	0	0	0	0	0	0	0	0	0	0	0	0	17800000	10
1548	QZT34637.1	heptaprenylglyceryl phosphate synthase [Caldalkalibacillus thermarum TA2.A1]	0	0	0	0	0	0	0	0	0	0	0	0	0	0	0	0	0	0	0	0	0	0	0	0	0	0	0	0	0	0	0	0	0	0	0	0	0	0	0	0	22400000	7
1549	QZT33794.1	glycine cleavage system protein GcvH [Caldalkalibacillus thermarum TA2.A1]	0	0	0	0	0	0	0	0	0	0	0	0	0	0	0	0	0	0	0	0	0	0	0	0	0	0	0	0	0	0	0	0	0	0	0	0	0	0	0	0	254000000	5
1550	QZT33281.1	sulfur carrier protein ThiS [Caldalkalibacillus thermarum TA2.A1]	0	0	0	0	0	0	0	0	0	0	0	0	0	0	0	0	0	0	0	0	0	0	0	0	0	0	0	0	0	0	0	0	0	0	0	0	0	0	0	0	56800000	5
1551	QZT34853.1	glycerol kinase GlpK [Caldalkalibacillus thermarum TA2.A1]	0	0	0	0	0	0	0	0	0	0	0	0	0	0	0	0	0	0	0	0	0	0	0	0	0	0	0	0	0	0	0	0	0	0	0	0	0	0	0	0	14500000	9
1552	QZT34443.1	KOW domain-containing RNA-binding protein [Caldalkalibacillus thermarum TA2.A1]	0	0	0	0	0	0	0	0	0	0	0	0	0	0	0	0	0	0	0	0	0	0	0	0	0	0	0	0	0	0	0	0	0	0	0	0	0	0	0	0	38600000	5
1553	QZT34373.1	aminodeoxychorismate lyase [Caldalkalibacillus thermarum TA2.A1]	0	0	0	0	0	0	0	0	0	0	0	0	0	0	0	0	0	0	0	0	0	0	0	0	0	0	0	0	0	0	0	0	0	0	0	0	0	0	0	0	19500000	7
1554	QZT35269.1	dihydroneopterin aldolase [Caldalkalibacillus thermarum TA2.A1]	0	0	0	0	0	0	0	0	0	0	0	0	0	0	0	0	0	0	0	0	0	0	0	0	0	0	0	0	0	0	0	0	0	0	0	0	0	0	0	0	67900000	5
1555	QZT34629.1	DUF2294 domain-containing protein [Caldalkalibacillus thermarum TA2.A1]	0	0	0	0	0	0	0	0	0	0	0	0	0	0	0	0	0	0	0	0	0	0	0	0	0	0	0	0	0	0	0	0	0	0	0	0	0	0	0	0	52400000	8
1556	QZT33488.1	tRNA preQ1(34) S-adenosylmethionine ribosyltransferase-isomerase QueA [Caldalkalibacillus thermarum TA2.A1]	0	0	0	0	0	0	0	0	0	0	0	0	0	0	0	0	0	0	0	0	0	0	0	0	0	0	0	0	0	0	0	0	0	0	0	0	0	0	0	0	11700000	8
1557	QZT33766.1	tryptophan synthase subunit beta [Caldalkalibacillus thermarum TA2.A1]	0	0	0	0	0	0	0	0	0	0	0	0	0	0	0	0	0	0	0	0	0	0	0	0	0	0	0	0	0	0	0	0	0	0	0	0	0	0	0	0	6100000	7
1558	QZT33649.1	hypothetical protein HUR95_15690 [Caldalkalibacillus thermarum TA2.A1]	0	0	0	0	0	0	0	0	0	0	0	0	0	0	0	0	0	0	0	0	0	0	0	0	0	0	0	0	0	0	0	0	0	0	0	0	0	0	0	0	18100000	4
1559	QZT33872.1	flavin reductase family protein [Caldalkalibacillus thermarum TA2.A1]	0	0	0	0	0	0	0	0	0	0	0	0	0	0	0	0	0	0	0	0	0	0	0	0	0	0	0	0	0	0	0	0	0	0	0	0	0	0	0	0	14700000	8
1560	QZT34481.1	gamma carbonic anhydrase family protein [Caldalkalibacillus thermarum TA2.A1]	0	0	0	0	0	0	0	0	0	0	0	0	0	0	0	0	0	0	0	0	0	0	0	0	0	0	0	0	0	0	0	0	0	0	0	0	0	0	0	0	229000000	4
1561	QZT33186.1	aminotransferase class I/II-fold pyridoxal phosphate-dependent enzyme [Caldalkalibacillus thermarum TA2.A1]	0	0	0	0	0	0	0	0	0	0	0	0	0	0	0	0	0	0	0	0	0	0	0	0	0	0	0	0	0	0	0	0	0	0	0	0	0	0	0	0	6610000	6
1562	QZT33897.1	bifunctional phosphoribosyl-AMP cyclohydrolase/phosphoribosyl-ATP diphosphatase HisIE [Caldalkalibacillus thermarum TA2.A1]	0	0	0	0	0	0	0	0	0	0	0	0	0	0	0	0	0	0	0	0	0	0	0	0	0	0	0	0	0	0	0	0	0	0	0	0	0	0	0	0	36300000	7
1563	QZT35028.1	copper chaperone CopZ [Caldalkalibacillus thermarum TA2.A1]	0	0	0	0	0	0	0	0	0	0	0	0	0	0	0	0	0	0	0	0	0	0	0	0	0	0	0	0	0	0	0	0	0	0	0	0	0	0	0	0	82600000	5
1564	QZT34724.1	carbamoyl-phosphate synthase (glutamine-hydrolyzing) large subunit [Caldalkalibacillus thermarum TA2.A1]	0	0	0	0	0	0	0	0	0	0	0	0	0	0	0	0	0	0	0	0	0	0	0	0	0	0	0	0	0	0	0	0	0	0	0	0	0	0	0	0	4950000	9
1565	QZT33603.1	hypothetical protein HUR95_15420 [Caldalkalibacillus thermarum TA2.A1]	0	0	0	0	0	0	0	0	0	0	0	0	0	0	0	0	0	0	0	0	0	0	0	0	0	0	0	0	0	0	0	0	0	0	0	0	0	0	0	0	51300000	5
1566	QZT35369.1	rhodanese-like domain-containing protein [Caldalkalibacillus thermarum TA2.A1]	0	0	0	0	0	0	0	0	0	0	0	0	0	0	0	0	0	0	0	0	0	0	0	0	0	0	0	0	0	0	0	0	0	0	0	0	0	0	0	0	65600000	6
1567	QZT33921.1	adenylyl-sulfate kinase [Caldalkalibacillus thermarum TA2.A1]	0	0	0	0	0	0	0	0	0	0	0	0	0	0	0	0	0	0	0	0	0	0	0	0	0	0	0	0	0	0	0	0	0	0	0	0	0	0	0	0	14000000	6
1568	QZT33890.1	phospho-sugar mutase [Caldalkalibacillus thermarum TA2.A1]	0	0	0	0	0	0	0	0	0	0	0	0	0	0	0	0	0	0	0	0	0	0	0	0	0	0	0	0	0	0	0	0	0	0	0	0	0	0	0	0	12000000	7
1569	QZT35071.1	hypothetical protein HUR95_07565 [Caldalkalibacillus thermarum TA2.A1]	0	0	0	0	0	0	0	0	0	0	0	0	0	0	0	0	0	0	0	0	0	0	0	0	0	0	0	0	0	0	0	0	0	0	0	0	0	0	0	0	20900000	5
1570	QZT34826.1	aspartate kinase [Caldalkalibacillus thermarum TA2.A1]	0	0	0	0	0	0	0	0	0	0	0	0	0	0	0	0	0	0	0	0	0	0	0	0	0	0	0	0	0	0	0	0	0	0	0	0	0	0	0	0	3990000	3
1571	QZT33418.1	shikimate dehydrogenase [Caldalkalibacillus thermarum TA2.A1]	0	0	0	0	0	0	0	0	0	0	0	0	0	0	0	0	0	0	0	0	0	0	0	0	0	0	0	0	0	0	0	0	0	0	0	0	0	0	0	0	11600000	8
1572	QZT32932.1	iron-sulfur cluster insertion protein ErpA [Caldalkalibacillus thermarum TA2.A1]	0	0	0	0	0	0	0	0	0	0	0	0	0	0	0	0	0	0	0	0	0	0	0	0	0	0	0	0	0	0	0	0	0	0	0	0	0	0	0	0	34800000	4
1573	QZT35455.1	hypothetical protein HUR95_13380 [Caldalkalibacillus thermarum TA2.A1]	0	0	0	0	0	0	0	0	0	0	0	0	0	0	0	0	0	0	0	0	0	0	0	0	0	0	0	0	0	0	0	0	0	0	0	0	0	0	0	0	23100000	3
1574	QZT32742.1	aspartate 1-decarboxylase [Caldalkalibacillus thermarum TA2.A1]	0	0	0	0	0	0	0	0	0	0	0	0	0	0	0	0	0	0	0	0	0	0	0	0	0	0	0	0	0	0	0	0	0	0	0	0	0	0	0	0	10600000	4
1575	QZT33441.1	MerR family transcriptional regulator [Caldalkalibacillus thermarum TA2.A1]	0	0	0	0	0	0	0	0	0	0	0	0	0	0	0	0	0	0	0	0	0	0	0	0	0	0	0	0	0	0	0	0	0	0	0	0	0	0	0	0	7730000	5
1576	QZT35209.1	4a-hydroxytetrahydrobiopterin dehydratase [Caldalkalibacillus thermarum TA2.A1]	0	0	0	0	0	0	0	0	0	0	0	0	0	0	0	0	0	0	0	0	0	0	0	0	0	0	0	0	0	0	0	0	0	0	0	0	0	0	0	0	9290000	3
1577	QZT34556.1	RNA polymerase sigma factor SigB [Caldalkalibacillus thermarum TA2.A1]	0	0	0	0	0	0	0	0	0	0	0	0	0	0	0	0	0	0	0	0	0	0	0	0	0	0	0	0	0	0	0	0	0	0	0	0	0	0	0	0	24500000	6
1578	QZT33265.1	DUF309 domain-containing protein [Caldalkalibacillus thermarum TA2.A1]	0	0	0	0	0	0	0	0	0	0	0	0	0	0	0	0	0	0	0	0	0	0	0	0	0	0	0	0	0	0	0	0	0	0	0	0	0	0	0	0	11700000	4
1579	QZT32815.1	acyl carrier protein [Caldalkalibacillus thermarum TA2.A1]	0	0	0	0	0	0	0	0	0	0	0	0	0	0	0	0	0	0	0	0	0	0	0	0	0	0	0	0	0	0	0	0	0	0	3100000	1	0	0	0	0	64500000	3
1580	QZT32458.1	flavodoxin [Caldalkalibacillus thermarum TA2.A1]	0	0	0	0	0	0	0	0	0	0	0	0	0	0	0	0	0	0	0	0	0	0	0	0	0	0	0	0	0	0	0	0	0	0	0	0	0	0	0	0	7540000	3
1581	QZT32463.1	(2Fe-2S)-binding protein [Caldalkalibacillus thermarum TA2.A1]	0	0	0	0	0	0	0	0	0	0	0	0	0	0	0	0	0	0	0	0	0	0	0	0	0	0	0	0	0	0	0	0	0	0	0	0	0	0	0	0	8830000	4
1582	QZT34320.1	tRNA adenosine(34) deaminase TadA [Caldalkalibacillus thermarum TA2.A1]	0	0	0	0	0	0	0	0	0	0	0	0	0	0	0	0	0	0	0	0	0	0	0	0	0	0	0	0	0	0	0	0	0	0	0	0	0	0	0	0	3750000	3
1583	QZT34802.1	peptide-methionine (S)-S-oxide reductase MsrA [Caldalkalibacillus thermarum TA2.A1]	0	0	0	0	0	0	0	0	0	0	0	0	0	0	0	0	0	0	0	0	0	0	0	0	0	0	0	0	0	0	0	0	0	0	0	0	0	0	0	0	9000000	5
1584	QZT35302.1	hypothetical protein HUR95_05105 [Caldalkalibacillus thermarum TA2.A1]	0	0	0	0	0	0	0	0	0	0	0	0	0	0	0	0	0	0	0	0	0	0	0	0	0	0	0	0	0	0	0	0	0	0	0	0	0	0	0	0	261000000	4
1585	QZT33877.1	DUF2332 domain-containing protein [Caldalkalibacillus thermarum TA2.A1]	0	0	0	0	0	0	0	0	0	0	0	0	0	0	0	0	0	0	0	0	0	0	0	0	0	0	0	0	0	0	0	0	0	0	0	0	0	0	0	0	2920000	5
1586	QZT33161.1	anti-sigma F factor antagonist [Caldalkalibacillus thermarum TA2.A1]	0	0	0	0	0	0	0	0	0	0	0	0	0	0	0	0	0	0	0	0	0	0	0	0	0	0	0	0	0	0	0	0	0	0	0	0	0	0	0	0	15000000	4
1587	QZT32657.1	exodeoxyribonuclease VII small subunit [Caldalkalibacillus thermarum TA2.A1]	0	0	0	0	0	0	0	0	0	0	0	0	0	0	0	0	0	0	0	0	0	0	0	0	0	0	0	0	0	0	0	0	0	0	0	0	0	0	0	0	6100000	2
1588	QZT34123.1	glucose 1-dehydrogenase [Caldalkalibacillus thermarum TA2.A1]	0	0	0	0	0	0	0	0	0	0	0	0	0	0	0	0	0	0	0	0	0	0	0	0	0	0	0	0	0	0	0	0	0	0	0	0	0	0	0	0	3650000	3
1589	QZT35392.1	bacillithiol biosynthesis deacetylase BshB1 [Caldalkalibacillus thermarum TA2.A1]	0	0	0	0	0	0	0	0	0	0	0	0	0	0	0	0	0	0	0	0	0	0	0	0	0	0	0	0	0	0	0	0	0	0	0	0	0	0	0	0	3430000	4
1590	QZT34933.1	SCP2 sterol-binding domain-containing protein [Caldalkalibacillus thermarum TA2.A1]	0	0	0	0	0	0	0	0	0	0	0	0	0	0	0	0	0	0	0	0	0	0	0	0	0	0	0	0	0	0	0	0	0	0	0	0	0	0	0	0	8090000	2
1591	QZT35300.1	gamma-type small acid-soluble spore protein [Caldalkalibacillus thermarum TA2.A1]	0	0	0	0	0	0	0	0	0	0	0	0	0	0	0	0	0	0	0	0	0	0	0	0	0	0	0	0	0	0	0	0	0	0	0	0	0	0	0	0	20300000	1
1592	QZT32926.1	YrzA family protein [Caldalkalibacillus thermarum TA2.A1]	0	0	0	0	0	0	0	0	0	0	0	0	0	0	0	0	0	0	0	0	0	0	0	0	0	0	0	0	0	0	0	0	0	0	0	0	0	0	0	0	2240000	2
1593	QZT33546.1	MarR family transcriptional regulator [Caldalkalibacillus thermarum TA2.A1]	0	0	0	0	0	0	0	0	0	0	0	0	0	0	0	0	0	0	0	0	0	0	0	0	0	0	0	0	0	0	0	0	0	0	0	0	0	0	0	0	2190000	3
1594	QZT33460.1	DUF1292 domain-containing protein [Caldalkalibacillus thermarum TA2.A1]	0	0	0	0	0	0	0	0	0	0	0	0	0	0	0	0	0	0	0	0	0	0	0	0	0	0	0	0	0	0	0	0	0	0	7320000	1	0	0	0	0	23800000	2
1595	QZT33923.1	phosphoadenylyl-sulfate reductase [Caldalkalibacillus thermarum TA2.A1]	0	0	0	0	0	0	0	0	0	0	0	0	0	0	0	0	0	0	0	0	0	0	0	0	0	0	0	0	0	0	0	0	0	0	0	0	0	0	0	0	3420000	3
1596	QZT33738.1	DUF86 domain-containing protein [Caldalkalibacillus thermarum TA2.A1]	0	0	0	0	0	0	0	0	0	0	0	0	0	0	0	0	0	0	0	0	0	0	0	0	0	0	0	0	0	0	0	0	0	0	0	0	0	0	0	0	1710000	5
1597	QZT33728.1	hypothetical protein HUR95_16140 [Caldalkalibacillus thermarum TA2.A1]	0	0	0	0	0	0	0	0	0	0	0	0	0	0	0	0	0	0	0	0	0	0	0	0	0	0	0	0	0	0	0	0	0	0	0	0	0	0	0	0	4080000	3
1598	QZT34226.1	N-acetylglucosamine-6-phosphate deacetylase [Caldalkalibacillus thermarum TA2.A1]	0	0	0	0	0	0	0	0	0	0	0	0	0	0	0	0	0	0	0	0	0	0	0	0	0	0	0	0	0	0	0	0	0	0	0	0	0	0	0	0	6240000	4
1599	QZT35506.1	DUF1450 domain-containing protein [Caldalkalibacillus thermarum TA2.A1]	0	0	0	0	0	0	0	0	0	0	0	0	0	0	0	0	0	0	0	0	0	0	0	0	0	0	0	0	0	0	0	0	0	0	0	0	0	0	0	0	5910000	1
1600	QZT34470.1	aldehyde dehydrogenase family protein [Caldalkalibacillus thermarum TA2.A1]	0	0	0	0	0	0	0	0	0	0	0	0	0	0	0	0	0	0	0	0	0	0	0	0	0	0	0	0	0	0	0	0	0	0	0	0	0	0	0	0	4750000	3
1601	QZT34485.1	PaaI family thioesterase [Caldalkalibacillus thermarum TA2.A1]	0	0	0	0	0	0	0	0	0	0	0	0	0	0	0	0	0	0	0	0	0	0	0	0	0	0	0	0	0	0	0	0	0	0	0	0	0	0	0	0	25300000	3
1602	QZT34648.1	sodium-dependent transporter [Caldalkalibacillus thermarum TA2.A1]	0	0	0	0	0	0	0	0	0	0	0	0	0	0	0	0	0	0	0	0	0	0	0	0	0	0	0	0	0	0	0	0	19000000	1	0	0	0	0	0	0	2300000	3
1603	QZT34150.1	type II toxin-antitoxin system PemK/MazF family toxin [Caldalkalibacillus thermarum TA2.A1]	0	0	0	0	0	0	0	0	0	0	0	0	0	0	0	0	0	0	0	0	0	0	0	0	0	0	0	0	0	0	0	0	0	0	0	0	0	0	0	0	13000000	3
1604	QZT35398.1	Stp1/IreP family PP2C-type Ser/Thr phosphatase [Caldalkalibacillus thermarum TA2.A1]	0	0	0	0	0	0	0	0	0	0	0	0	0	0	0	0	0	0	0	0	0	0	0	0	0	0	0	0	0	0	0	0	0	0	0	0	0	0	0	0	1250000	2
1605	QZT34921.1	GbsR/MarR family transcriptional regulator [Caldalkalibacillus thermarum TA2.A1]	0	0	0	0	0	0	0	0	0	0	0	0	0	0	0	0	0	0	0	0	0	0	0	0	0	0	0	0	0	0	0	0	0	0	0	0	0	0	0	0	4650000	2
1606	QZT33687.1	DUF4241 domain-containing protein [Caldalkalibacillus thermarum TA2.A1]	0	0	0	0	0	0	0	0	0	0	0	0	0	0	0	0	0	0	0	0	0	0	0	0	0	0	0	0	0	0	0	0	0	0	0	0	0	0	0	0	97200000	2
1607	QZT35439.1	alanine dehydrogenase [Caldalkalibacillus thermarum TA2.A1]	0	0	0	0	0	0	0	0	0	0	0	0	0	0	0	0	0	0	0	0	0	0	0	0	0	0	0	0	0	0	0	0	0	0	0	0	0	0	0	0	271000	2
1608	QZT35117.1	NAD kinase [Caldalkalibacillus thermarum TA2.A1]	0	0	0	0	0	0	0	0	0	0	0	0	0	0	0	0	0	0	0	0	0	0	0	0	0	0	0	0	0	0	0	0	0	0	0	0	0	0	0	0	3940000	3
1609	QZT34848.1	glycerophosphodiester phosphodiesterase [Caldalkalibacillus thermarum TA2.A1]	0	0	0	0	0	0	0	0	0	0	0	0	0	0	0	0	0	0	0	0	0	0	0	0	0	0	0	0	0	0	0	0	0	0	0	0	0	0	0	0	964000	3
1610	QZT33394.1	NUDIX hydrolase [Caldalkalibacillus thermarum TA2.A1]	0	0	0	0	0	0	0	0	0	0	0	0	0	0	0	0	0	0	0	0	0	0	0	0	0	0	0	0	0	0	0	0	0	0	0	0	0	0	0	0	2480000	5
1611	QZT35070.1	hypothetical protein HUR95_07560 [Caldalkalibacillus thermarum TA2.A1]	0	0	0	0	0	0	0	0	0	0	0	0	0	0	0	0	0	0	0	0	0	0	0	0	0	0	0	0	0	0	0	0	0	0	0	0	0	0	0	0	15400000	4
1612	QZT35377.1	CoA pyrophosphatase [Caldalkalibacillus thermarum TA2.A1]	0	0	0	0	0	0	0	0	0	0	0	0	0	0	0	0	0	0	0	0	0	0	0	0	0	0	0	0	0	0	0	0	0	0	0	0	0	0	0	0	6650000	2
1613	QZT32902.1	hypothetical protein HUR95_11180 [Caldalkalibacillus thermarum TA2.A1]	0	0	0	0	0	0	0	0	0	0	0	0	0	0	0	0	0	0	0	0	0	0	0	0	0	0	0	0	0	0	0	0	0	0	0	0	0	0	0	0	3860000	3
1614	QZT34883.1	MoaD/ThiS family protein [Caldalkalibacillus thermarum TA2.A1]	0	0	0	0	0	0	0	0	0	0	0	0	0	0	0	0	0	0	0	0	0	0	0	0	0	0	0	0	0	0	0	0	0	0	0	0	0	0	0	0	1940000	2
1615	QZT34788.1	DUF3870 domain-containing protein [Caldalkalibacillus thermarum TA2.A1]	0	0	0	0	0	0	0	0	0	0	0	0	0	0	0	0	0	0	0	0	0	0	0	0	0	0	0	0	0	0	0	0	0	0	0	0	0	0	0	0	15100000	3
1616	QZT32526.1	Cof-type HAD-IIB family hydrolase [Caldalkalibacillus thermarum TA2.A1]	0	0	0	0	0	0	0	0	0	0	0	0	0	0	0	0	0	0	0	0	0	0	0	0	0	0	0	0	0	0	0	0	0	0	0	0	0	0	0	0	1170000	2
1617	QZT32654.1	O-sialoglycoprotein endopeptidase [Caldalkalibacillus thermarum TA2.A1]	0	0	0	0	0	0	0	0	0	0	0	0	0	0	0	0	0	0	0	0	0	0	0	0	0	0	0	0	0	0	0	0	0	0	0	0	0	0	0	0	3140000	3
1618	QZT35108.1	MBL fold metallo-hydrolase [Caldalkalibacillus thermarum TA2.A1]	0	0	0	0	0	0	0	0	0	0	0	0	0	0	0	0	0	0	0	0	0	0	0	0	0	0	0	0	0	0	0	0	0	0	0	0	0	0	0	0	3170000	4
1619	QZT34001.1	hypothetical protein HUR95_00745 [Caldalkalibacillus thermarum TA2.A1]	0	0	0	0	0	0	0	0	0	0	0	0	0	0	0	0	0	0	0	0	0	0	0	0	0	0	0	0	0	0	0	0	0	0	0	0	0	0	0	0	3850000	2
1620	QZT34345.1	septation regulator SpoVG [Caldalkalibacillus thermarum TA2.A1]	0	0	0	0	0	0	0	0	0	0	0	0	0	0	0	0	0	0	0	0	0	0	0	0	0	0	0	0	0	0	0	0	0	0	11000000	1	0	0	0	0	13300000	3
1621	QZT35205.1	DUF262 domain-containing protein [Caldalkalibacillus thermarum TA2.A1]	0	0	0	0	0	0	0	0	0	0	0	0	0	0	0	0	0	0	0	0	0	0	0	0	0	0	0	0	0	0	0	0	0	0	0	0	0	0	0	0	1350000	3
1622	QZT35409.1	PRD domain-containing protein [Caldalkalibacillus thermarum TA2.A1]	0	0	0	0	0	0	0	0	0	0	0	0	0	0	0	0	0	0	0	0	0	0	0	0	0	0	0	0	0	0	0	0	0	0	0	0	0	0	0	0	1580000	3
1623	QZT35249.1	DNA-directed RNA polymerase subunit delta [Caldalkalibacillus thermarum TA2.A1]	0	0	0	0	0	0	0	0	0	0	0	0	0	0	0	0	0	0	0	0	0	0	0	0	0	0	0	0	0	0	0	0	0	0	0	0	0	0	0	0	4380000	2
1624	QZT34576.1	iron-sulfur cluster biosynthesis family protein [Caldalkalibacillus thermarum TA2.A1]	0	0	0	0	0	0	0	0	0	0	0	0	0	0	0	0	0	0	0	0	0	0	0	0	0	0	0	0	0	0	0	0	0	0	0	0	0	0	0	0	12400000	2
1625	QZT35408.1	phosphocarrier protein HPr [Caldalkalibacillus thermarum TA2.A1]	0	0	0	0	0	0	0	0	0	0	0	0	0	0	0	0	0	0	0	0	0	0	0	0	0	0	0	0	0	0	0	0	0	0	0	0	0	0	0	0	6140000	1
1626	QZT35361.1	response regulator transcription factor [Caldalkalibacillus thermarum TA2.A1]	0	0	0	0	0	0	0	0	0	0	0	0	0	0	0	0	0	0	0	0	0	0	0	0	0	0	0	0	0	0	0	0	0	0	0	0	0	0	0	0	810000	2
1627	QZT35447.1	response regulator transcription factor [Caldalkalibacillus thermarum TA2.A1]	0	0	0	0	0	0	0	0	0	0	0	0	0	0	0	0	0	0	0	0	0	0	0	0	0	0	0	0	0	0	0	0	0	0	0	0	0	0	0	0	810000	2
1628	QZT35182.1	hypothetical protein HUR95_08235 [Caldalkalibacillus thermarum TA2.A1]	0	0	0	0	0	0	0	0	0	0	0	0	0	0	0	0	0	0	0	0	0	0	0	0	0	0	0	0	0	0	0	0	0	0	0	0	0	0	0	0	5150000	3
1629	QZT35417.1	methionine gamma-lyase family protein [Caldalkalibacillus thermarum TA2.A1]	0	0	0	0	0	0	0	0	0	0	0	0	0	0	0	0	0	0	0	0	0	0	0	0	0	0	0	0	0	0	0	0	0	0	0	0	0	0	0	0	312000	2
1630	QZT34899.1	IclR family transcriptional regulator [Caldalkalibacillus thermarum TA2.A1]	0	0	0	0	0	0	0	0	0	0	0	0	0	0	0	0	0	0	0	0	0	0	0	0	0	0	0	0	0	0	0	0	0	0	0	0	0	0	0	0	759000	2
1631	QZT34206.1	hypothetical protein HUR95_01950 [Caldalkalibacillus thermarum TA2.A1]	0	0	0	0	0	0	0	0	0	0	0	0	0	0	0	0	0	0	0	0	0	0	0	0	0	0	0	0	0	0	0	0	0	0	0	0	0	0	0	0	2450000	2
1632	QZT34560.1	DUF3006 domain-containing protein [Caldalkalibacillus thermarum TA2.A1]	0	0	0	0	0	0	0	0	0	0	0	0	0	0	0	0	0	0	0	0	0	0	0	0	0	0	0	0	0	0	0	0	0	0	0	0	0	0	0	0	1770000	2
1633	QZT34578.1	thiamine-phosphate kinase [Caldalkalibacillus thermarum TA2.A1]	0	0	0	0	0	0	0	0	0	0	0	0	0	0	0	0	0	0	0	0	0	0	0	0	0	0	0	0	0	0	0	0	0	0	0	0	0	0	0	0	4610000	3
[truncated: 157 more rows]
